# Supplementary material for: Effects of Cryopreservation on Sperm with Cryodiluent in Viviparous Black Rockfish (Sebastes schlegelii)
Source: MDPI journal article supplement (doi:10.3390/ijms23063392), 2022-03-21
Supplement: s1 [file s1]

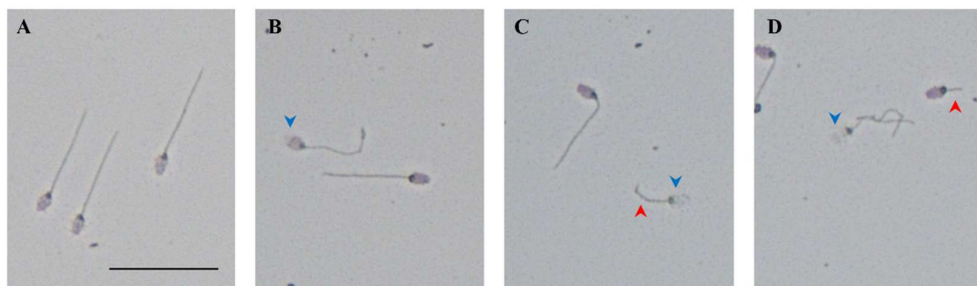

**Figure S1.** The morphology of fresh and post-thaw sperm. (A) Morphology of fresh sperm. (B–D) Morphology of post-thaw sperm. The sperm was dyed by sperm morphology rapid staining solution (Solarbio, Beijing, CHN). Abnormal head, indicated by blue arrowhead; broken tail, indicated by red arrowhead. Scale bar = 20  $\mu\text{m}$ .
