# Supplementary material for: Effects of Cryopreservation on Sperm with Cryodiluent in Viviparous Black Rockfish (Sebastes schlegelii)
Source: Int J Mol Sci. 2022 Mar 21;23(6):3392. doi: 10.3390/ijms23063392 (PMC8955014; doi:10.3390/ijms23063392)
Supplement: Supplementary file 1 [file ijms-23-03392-s001.zip › Data S1. The supplementary data of transcriptome analysis.xlsx]

## Sheet: DEGs
id	baseMean	log2FoldChange	lfcSE	stat	pvalue	qvalue	F1	F2	F3	C1	C2	C3	Unigene	Nr	Swissprot	KEGG	GO
S.schlegelii_GLEAN_10002217	210.119	-11.4461	1.85752	-6.16204	7.18e-10	9.15e-06	22.2695	10.2793	27.8471	0	0	0	S.schlegelii_GLEAN_10002217	gi|734650142|ref|XP_010754388.1|/6.77468e-165/PREDICTED: ubiquitin carboxyl-terminal hydrolase 64E-like [Larimichthys crocea]	O22207/1e-19/ UBP5_ARATH Ubiquitin carboxyl-terminal hydrolase 5 OS=Arabidopsis thaliana GN=UBP5 PE=1 SV=2	sasa:106596943/3e-79/ubiquitin carboxyl-terminal hydrolase 26-like; K11857 ubiquitin carboxyl-terminal hydrolase 47 [EC:3.4.19.12]	biological_process:GO:0006511//ubiquitin-dependent protein catabolic process;GO:0016579//protein deubiquitination;molecular_function:GO:0036459//ubiquitinyl hydrolase activity;
S.schlegelii_GLEAN_10006899	20.4856	-22.1849	3.90949	-5.67462	1.39e-08	9.79e-06	0	0	5.02286	0	0	0	S.schlegelii_GLEAN_10006899	gi|734624843|ref|XP_010740492.1|/0/PREDICTED: solute carrier family 13 member 1 [Larimichthys crocea]	Q9JHI4/0.0/ S13A1_MOUSE Solute carrier family 13 member 1 OS=Mus musculus GN=Slc13a1 PE=2 SV=2	lco:104927986/0.0/slc13a1; solute carrier family 13 member 1; K14444 solute carrier family 13 (sodium/sulfate cotransporter), member 1/4	biological_process:GO:0006814//sodium ion transport;GO:0055085//transmembrane transport;cellular_component:GO:0016020//membrane;molecular_function:GO:0005215//transporter activity;
S.schlegelii_GLEAN_10019435	20.4856	-22.1849	3.90949	-5.67462	1.39e-08	9.79e-06	0	0	2.3383	0	0	0	S.schlegelii_GLEAN_10019435	gi|808871545|gb|KKF21226.1|/0/1-phosphatidylinositol-4,5-bisphosphate phosphodiesterase beta-4 [Larimichthys crocea]	Q15147/0.0/ PLCB4_HUMAN 1-phosphatidylinositol 4,5-bisphosphate phosphodiesterase beta-4 OS=Homo sapiens GN=PLCB4 PE=1 SV=3	lco:104919801/0.0/plcb4; phospholipase C beta 4; K05858 phosphatidylinositol phospholipase C, beta [EC:3.1.4.11]	biological_process:GO:0006629//lipid metabolic process;GO:0007165//signal transduction;GO:0035556//intracellular signal transduction;molecular_function:GO:0004435//phosphatidylinositol phospholipase C activity;GO:0005515//protein binding;
S.schlegelii_GLEAN_10018520	20.4856	-22.1849	3.90949	-5.67462	1.39e-08	9.79e-06	0	0	24.1005	0	0	0	S.schlegelii_GLEAN_10018520	gi|734608309|ref|XP_010731399.1|/1.96139e-125/PREDICTED: protein FAM219B [Larimichthys crocea] &gt;gi|808868475|gb|KKF18789.1| Hypothetical protein EH28_14303 [Larimichthys crocea]	Q14DQ1/4e-46/ F219B_MOUSE Protein FAM219B OS=Mus musculus GN=Fam219b PE=1 SV=1	NA	NA
S.schlegelii_GLEAN_10000100	20.4856	-22.1849	3.90949	-5.67462	1.39e-08	9.79e-06	0	0	5.19462	0	0	0	S.schlegelii_GLEAN_10000100	gi|554841485|ref|XP_005931160.1|/0/PREDICTED: cerebral cavernous malformations 2 protein-like [Haplochromis burtoni]	Q9NUG4/0.0/ CCM2L_HUMAN Cerebral cavernous malformations 2 protein-like OS=Homo sapiens GN=CCM2L PE=2 SV=3	NA	NA
S.schlegelii_GLEAN_10008056	20.4856	-22.1849	3.90949	-5.67462	1.39e-08	9.79e-06	0	0	4.00122	0	0	0	S.schlegelii_GLEAN_10008056	gi|962024957|ref|XP_014882475.1|/0/PREDICTED: E3 ubiquitin/ISG15 ligase TRIM25-like, partial [Poecilia latipinna]	Q5R760/2e-61/ TRI16_PONAB Tripartite motif-containing protein 16 OS=Pongo abelii GN=TRIM16 PE=2 SV=1	mze:101467271/0.0/E3 ubiquitin/ISG15 ligase TRIM25-like; K10652 tripartite motif-containing protein 25 [EC:2.3.2.27]	cellular_component:GO:0005622//intracellular;molecular_function:GO:0005515//protein binding;GO:0008270//zinc ion binding;
S.schlegelii_GLEAN_10011823	20.4856	-22.1849	3.90949	-5.67462	1.39e-08	9.79e-06	0	0	5.56462	0	0	0	S.schlegelii_GLEAN_10011823	gi|808880674|gb|KKF28485.1|/0/Kelch-like protein 30 [Larimichthys crocea]	Q0D2K2/0.0/ KLH30_HUMAN Kelch-like protein 30 OS=Homo sapiens GN=KLHL30 PE=2 SV=3	lco:104926029/0.0/klhl30; kelch like family member 30; K10466 kelch-like protein 30	molecular_function:GO:0005515//protein binding;
S.schlegelii_GLEAN_10012992	18.8683	-22.0731	3.90973	-5.6457	1.65e-08	9.79e-06	0	0	6.21997	0	0	0	S.schlegelii_GLEAN_10012992	gi|734599395|ref|XP_010752437.1|/0/PREDICTED: magnesium transporter MRS2 homolog, mitochondrial [Larimichthys crocea]	Q9ET09/4e-153/ MRS2_RAT Magnesium transporter MRS2 homolog, mitochondrial OS=Rattus norvegicus GN=Mrs2 PE=2 SV=1	lcf:108889536/0.0/mrs2; magnesium transporter MRS2 homolog, mitochondrial; K16075 magnesium transporter	NA
S.schlegelii_GLEAN_10001789	18.8683	-22.0731	3.90973	-5.6457	1.65e-08	9.79e-06	0	0	14.7348	0	0	0	S.schlegelii_GLEAN_10001789	gi|657571157|ref|XP_008289136.1|/5.74949e-120/PREDICTED: ubiquitin-like-conjugating enzyme ATG10 [Stegastes partitus] &gt;gi|657571159|ref|XP_008289137.1| PREDICTED: ubiquitin-like-conjugating enzyme ATG10 [Stegastes partitus] &gt;gi|657571161|ref|XP_008289138.1| PREDICTED: ubiquitin-like-conjugating enzyme ATG10 [Stegastes partitus]	Q8R1P4/2e-57/ ATG10_MOUSE Ubiquitin-like-conjugating enzyme ATG10 OS=Mus musculus GN=Atg10 PE=1 SV=1	lco:109142683/2e-132/ubiquitin-like-conjugating enzyme ATG10; K17888 ubiquitin-like-conjugating enzyme ATG10	NA
S.schlegelii_GLEAN_10020106	18.8683	-22.0731	3.90973	-5.6457	1.65e-08	9.79e-06	0	0	5.13297	0	0	0	S.schlegelii_GLEAN_10020106	gi|657565799|ref|XP_008286215.1|/0/PREDICTED: solute carrier family 22 member 4-like [Stegastes partitus]	O76082/0.0/ S22A5_HUMAN Solute carrier family 22 member 5 OS=Homo sapiens GN=SLC22A5 PE=1 SV=1	lcf:108893855/0.0/solute carrier family 22 member 5-like; K08202 MFS transporter, OCT family, solute carrier family 22 (organic cation transporter), member 4/5	biological_process:GO:0055085//transmembrane transport;cellular_component:GO:0016021//integral component of membrane;molecular_function:GO:0022857//transmembrane transporter activity;
S.schlegelii_GLEAN_10001913	18.8683	-22.0731	3.90973	-5.6457	1.65e-08	9.79e-06	0	0	6.28258	0	0	0	S.schlegelii_GLEAN_10001913	gi|928039815|ref|XP_013868639.1|/0/PREDICTED: RNA-directed DNA polymerase from mobile element jockey-like [Austrofundulus limnaeus]	P21328/2e-30/ RTJK_DROME RNA-directed DNA polymerase from mobile element jockey OS=Drosophila melanogaster GN=pol PE=1 SV=1	csem:103389101/4e-132/LOW QUALITY PROTEIN: ryanodine receptor 3-like; K04963 ryanodine receptor 3	biological_process:GO:0055114//oxidation-reduction process;molecular_function:GO:0008168//methyltransferase activity;GO:0016706//oxidoreductase activity, acting on paired donors, with incorporation or reduction of molecular oxygen, 2-oxoglutarate as one donor, and incorporation of one atom each of oxygen into both donors;
S.schlegelii_GLEAN_10007560	18.8683	-22.0731	3.90973	-5.6457	1.65e-08	9.79e-06	0	0	1.6271	0	0	0	S.schlegelii_GLEAN_10007560	gi|498938135|ref|XP_004541579.1|/0/PREDICTED: FH1/FH2 domain-containing protein 3-like isoform X2 [Maylandia zebra]	Q2V2M9/0.0/ FHOD3_HUMAN FH1/FH2 domain-containing protein 3 OS=Homo sapiens GN=FHOD3 PE=1 SV=2	ncc:104942019/2e-54/acetoacetyl-CoA synthetase-like; K01907 acetoacetyl-CoA synthetase [EC:6.2.1.16]	biological_process:GO:0007015//actin filament organization;
S.schlegelii_GLEAN_10003413	17.7902	-21.9936	3.90991	-5.62509	1.85e-08	9.79e-06	0	0	9.72794	0	0	0	S.schlegelii_GLEAN_10003413	gi|923810056|ref|XP_013766222.1|/1.91173e-146/PREDICTED: homeobox protein Nkx-2.4-like [Pundamilia nyererei]	Q9EQM3/2e-84/ NKX24_MOUSE Homeobox protein Nkx-2.4 OS=Mus musculus GN=Nkx2-4 PE=2 SV=2	mze:101477120/5e-147/nkx2-4; NK2 homeobox 4; K09344 homeobox protein Nkx-2.4	biological_process:GO:0006355//regulation of transcription, DNA-templated;molecular_function:GO:0003677//DNA binding;GO:0043565//sequence-specific DNA binding;
S.schlegelii_GLEAN_10021374	17.7902	-21.9936	3.90991	-5.62509	1.85e-08	9.79e-06	0	0	10.0145	0	0	0	S.schlegelii_GLEAN_10021374	gi|736246453|ref|XP_010786629.1|/0/PREDICTED: ketosamine-3-kinase-like [Notothenia coriiceps]	Q8K274/2e-161/ KT3K_MOUSE Ketosamine-3-kinase OS=Mus musculus GN=Fn3krp PE=1 SV=2	ncc:104960327/0.0/ketosamine-3-kinase-like; K15523 protein-ribulosamine 3-kinase [EC:2.7.1.172]	NA
S.schlegelii_GLEAN_10018266	17.7902	-21.9936	3.90991	-5.62509	1.85e-08	9.79e-06	0	0	4.12522	0	0	0	S.schlegelii_GLEAN_10018266	gi|734642454|ref|XP_010750161.1|/0/PREDICTED: pro-neuregulin-1, membrane-bound isoform-like [Larimichthys crocea]	Q05199/5e-58/ NRG1_CHICK Pro-neuregulin-1, membrane-bound isoform OS=Gallus gallus GN=NRG1 PE=1 SV=1	lcf:108877713/0.0/pro-neuregulin-1, membrane-bound isoform-like isoform X1; K05455 neuregulin 1	biological_process:GO:0009790//embryo development;molecular_function:GO:0005102//receptor binding;GO:0005515//protein binding;
S.schlegelii_GLEAN_10004696	16.9815	-21.931	3.91006	-5.60886	2.04e-08	9.79e-06	0	0	4.77165	0	0	0	S.schlegelii_GLEAN_10004696	gi|401664016|dbj|BAM36389.1|/0/bloodthirsty-2 [Oplegnathus fasciatus]	Q02084/5e-68/ A33_PLEWA Zinc-binding protein A33 OS=Pleurodeles waltl PE=1 SV=2	lcf:108873960/0.0/E3 ubiquitin-protein ligase TRIM21-like; K10651 tripartite motif-containing protein 21 [EC:2.3.2.27]	cellular_component:GO:0005622//intracellular;molecular_function:GO:0005515//protein binding;GO:0008270//zinc ion binding;
S.schlegelii_GLEAN_10012137	16.9815	-21.931	3.91006	-5.60886	2.04e-08	9.79e-06	0	0	25.8189	0	0	0	S.schlegelii_GLEAN_10012137	gi|734640296|ref|XP_010748980.1|/1.14535e-50/PREDICTED: zinc finger protein RFP-like [Larimichthys crocea]	NA	lcf:108880987/9e-38/E3 ubiquitin-protein ligase TRIM21-like isoform X1; K10651 tripartite motif-containing protein 21 [EC:2.3.2.27]	NA
S.schlegelii_GLEAN_10012574	16.9815	-21.931	3.91006	-5.60886	2.04e-08	9.79e-06	0	0	1.76143	0	0	0	S.schlegelii_GLEAN_10012574	gi|657540416|ref|XP_008276249.1|/0/PREDICTED: bile salt export pump-like isoform X1 [Stegastes partitus]	O95342/0.0/ ABCBB_HUMAN Bile salt export pump OS=Homo sapiens GN=ABCB11 PE=1 SV=2	lcf:108880225/0.0/bile salt export pump-like isoform X1; K05664 ATP-binding cassette, subfamily B (MDR/TAP), member 11	biological_process:GO:0006810//transport;GO:0015721//bile acid and bile salt transport;GO:0055085//transmembrane transport;cellular_component:GO:0016021//integral component of membrane;molecular_function:GO:0005524//ATP binding;GO:0016887//ATPase activity;GO:0042626//ATPase activity, coupled to transmembrane movement of substances;
S.schlegelii_GLEAN_10018355	16.9815	-21.931	3.91006	-5.60886	2.04e-08	9.79e-06	0	0	37.2923	0	0	0	S.schlegelii_GLEAN_10018355	gi|229368142|gb|ACQ59051.1|/1.70391e-67/Nattectin precursor [Anoplopoma fimbria]	P81018/2e-27/ LADD_ONCMY Ladderlectin OS=Oncorhynchus mykiss PE=1 SV=2	ncc:104967547/3e-58/ladderlectin-like; K22244 regenerating islet-derived protein 4	NA
S.schlegelii_GLEAN_10022621	16.9815	-21.931	3.91006	-5.60886	2.04e-08	9.79e-06	0	0	10.7856	0	0	0	S.schlegelii_GLEAN_10022621	gi|736180005|ref|XP_010768394.1|/4.09066e-138/PREDICTED: transcription factor HES-7-like [Notothenia coriiceps]	Q8BKT2/9e-17/ HES7_MOUSE Transcription factor HES-7 OS=Mus musculus GN=Hes7 PE=1 SV=1	ncc:104944544/8e-139/transcription factor HES-7-like; K09087 hairy and enhancer of split 2/6/7	molecular_function:GO:0046983//protein dimerization activity;
S.schlegelii_GLEAN_10001301	16.1729	-21.8635	3.91022	-5.59137	2.25e-08	9.79e-06	0	0	4.53969	0	0	0	S.schlegelii_GLEAN_10001301	gi|401664016|dbj|BAM36389.1|/0/bloodthirsty-2 [Oplegnathus fasciatus]	Q62158/5e-72/ TRI27_MOUSE Zinc finger protein RFP OS=Mus musculus GN=Trim27 PE=1 SV=2	lcf:108873960/0.0/E3 ubiquitin-protein ligase TRIM21-like; K10651 tripartite motif-containing protein 21 [EC:2.3.2.27]	cellular_component:GO:0005622//intracellular;molecular_function:GO:0005515//protein binding;GO:0008270//zinc ion binding;GO:0046872//metal ion binding;
S.schlegelii_GLEAN_10016129	16.1729	-21.8635	3.91022	-5.59137	2.25e-08	9.79e-06	0	0	74.368	0	0	0	S.schlegelii_GLEAN_10016129	gi|908560916|ref|XP_013123710.1|/1.67365e-18/PREDICTED: uncharacterized protein LOC106097799 [Oreochromis niloticus]	NA	NA	NA
S.schlegelii_GLEAN_10009138	15.3642	-21.7948	3.9104	-5.57354	2.5e-08	9.79e-06	0	0	6.06224	0	0	0	S.schlegelii_GLEAN_10009138	gi|657531758|ref|XP_008302468.1|/0/PREDICTED: transforming growth factor beta-2-like [Stegastes partitus]	P27090/2e-155/ TGFB2_MOUSE Transforming growth factor beta-2 OS=Mus musculus GN=Tgfb2 PE=1 SV=2	lcf:108872574/0.0/transforming growth factor beta-2-like; K13376 transforming growth factor beta-2	biological_process:GO:0016049//cell growth;GO:0040007//growth;cellular_component:GO:0005615//extracellular space;molecular_function:GO:0005160//transforming growth factor beta receptor binding;GO:0008083//growth factor activity;
S.schlegelii_GLEAN_10018610	15.3642	-21.7948	3.9104	-5.57354	2.5e-08	9.79e-06	0	0	5.17709	0	0	0	S.schlegelii_GLEAN_10018610	gi|808880366|gb|KKF28246.1|/0/Protocadherin gamma-A8 [Larimichthys crocea]	Q9NRJ7/2e-69/ PCDBG_HUMAN Protocadherin beta-16 OS=Homo sapiens GN=PCDHB16 PE=1 SV=3	ccar:109108540/0.0/protocadherin gamma-A10-like; K16495 protocadherin gamma subfamily A	biological_process:GO:0007155//cell adhesion;GO:0007156//homophilic cell adhesion via plasma membrane adhesion molecules;cellular_component:GO:0005886//plasma membrane;GO:0016020//membrane;molecular_function:GO:0005509//calcium ion binding;
S.schlegelii_GLEAN_10021746	15.3642	-21.7948	3.9104	-5.57354	2.5e-08	9.79e-06	0	0	5.7517	0	0	0	S.schlegelii_GLEAN_10021746	gi|554812922|ref|XP_005917300.1|/0/PREDICTED: kynurenine--oxoglutarate transaminase 1 isoform X1 [Haplochromis burtoni]	Q8BTY1/0.0/ KAT1_MOUSE Kynurenine--oxoglutarate transaminase 1 OS=Mus musculus GN=Kyat1 PE=1 SV=1	lcf:108874060/0.0/kyat1; LOW QUALITY PROTEIN: kynurenine--oxoglutarate transaminase 1; K00816 kynurenine---oxoglutarate transaminase / cysteine-S-conjugate beta-lyase / glutamine---phenylpyruvate transaminase [EC:2.6.1.7 4.4.1.13 2.6.1.64]	biological_process:GO:0009058//biosynthetic process;molecular_function:GO:0030170//pyridoxal phosphate binding;
S.schlegelii_GLEAN_10000020	15.3642	-21.7948	3.9104	-5.57354	2.5e-08	9.79e-06	0	0	21.6201	0	0	0	S.schlegelii_GLEAN_10000020	gi|21070180|gb|AAM34209.1|AF503912_2/5.62544e-50/envelope protein [Danio rerio]	P60509/2e-09/ ERB1_HUMAN Endogenous retrovirus group PABLB member 1 Env polyprotein OS=Homo sapiens GN=ERVPABLB-1 PE=2 SV=1	ipu:108267213/1e-10/Fc receptor-like protein 5; K06727 Fc receptor-like protein	NA
S.schlegelii_GLEAN_10002992	15.3642	-21.7948	3.9104	-5.57354	2.5e-08	9.79e-06	0	0	6.34785	0	0	0	S.schlegelii_GLEAN_10002992	gi|657596211|ref|XP_008302798.1|/0/PREDICTED: kelch domain-containing protein 10-like [Stegastes partitus]	Q28DE7/0.0/ KLD10_XENTR Kelch domain-containing protein 10 OS=Xenopus tropicalis GN=klhdc10 PE=2 SV=2	nai:NECAME_03983/7e-47/metallo-beta-lactamase domain protein; K14403 cleavage and polyadenylation specificity factor subunit 3 [EC:3.1.27.-]	molecular_function:GO:0005515//protein binding;
S.schlegelii_GLEAN_10001002	19.677	-21.7672	3.9096	-5.56763	2.58e-08	9.79e-06	0	0	8.29301	0	0	0	S.schlegelii_GLEAN_10001002	gi|657753963|ref|XP_008312500.1|/1.01037e-85/PREDICTED: uncharacterized protein LOC103381760 [Cynoglossus semilaevis]	NA	nfu:107396952/2e-16/ryanodine receptor 2-like; K04962 ryanodine receptor 2	biological_process:GO:0006351//transcription, DNA-templated;GO:0006355//regulation of transcription, DNA-templated;GO:0006366//transcription from RNA polymerase II promoter;cellular_component:GO:0005634//nucleus;molecular_function:GO:0000981//sequence-specific DNA binding RNA polymerase II transcription factor activity;GO:0003700//sequence-specific DNA binding transcription factor activity;
S.schlegelii_GLEAN_10008823	19.677	-21.7672	3.9096	-5.56763	2.58e-08	9.79e-06	0	0	13.2473	0	0	0	S.schlegelii_GLEAN_10008823	gi|657549225|ref|XP_008279391.1|/2.40523e-103/PREDICTED: class II histocompatibility antigen, B-L beta chain-like [Stegastes partitus]	P13762/1e-34/ DRB4_HUMAN HLA class II histocompatibility antigen, DR beta 4 chain OS=Homo sapiens GN=HLA-DRB4 PE=1 SV=2	lcf:108899536/3e-126/H-2 class II histocompatibility antigen, E-S beta chain-like isoform X1; K06752 major histocompatibility complex, class II	biological_process:GO:0006955//immune response;GO:0019882//antigen processing and presentation;cellular_component:GO:0016020//membrane;GO:0042613//MHC class II protein complex;molecular_function:GO:0005515//protein binding;
S.schlegelii_GLEAN_10019730	19.677	-21.7672	3.9096	-5.56763	2.58e-08	9.79e-06	0	0	9.197	0	0	0	S.schlegelii_GLEAN_10019730	gi|734607704|ref|XP_010731061.1|/0/PREDICTED: low-density lipoprotein receptor class A domain-containing protein 3 [Larimichthys crocea]	A2AR95/2e-120/ LRAD3_MOUSE Low-density lipoprotein receptor class A domain-containing protein 3 OS=Mus musculus GN=Ldlrad3 PE=1 SV=1	amj:102565081/7e-26/LRP2; LDL receptor related protein 2; K06233 low density lipoprotein-related protein 2	molecular_function:GO:0005515//protein binding;
S.schlegelii_GLEAN_10013695	14.3908	-21.7075	3.91064	-5.55088	2.84e-08	9.79e-06	1.87271	0	0	0	0	0	S.schlegelii_GLEAN_10013695	gi|734637166|ref|XP_010747255.1|/0/PREDICTED: lipid phosphate phosphatase-related protein type 4-like [Larimichthys crocea]	Q7TME0/0.0/ PLPR4_MOUSE Phospholipid phosphatase-related protein type 4 OS=Mus musculus GN=Plppr4 PE=1 SV=2	lco:104933488/0.0/phospholipid phosphatase-related protein type 4-like; K19582 lipid phosphate phosphatase-related protein type 3/4	biological_process:GO:0007409//axonogenesis;GO:0046839//phospholipid dephosphorylation;cellular_component:GO:0005887//integral component of plasma membrane;molecular_function:GO:0042577//lipid phosphatase activity;
S.schlegelii_GLEAN_10004041	14.3908	-21.7075	3.91064	-5.55088	2.84e-08	9.79e-06	6.33555	0	0	0	0	0	S.schlegelii_GLEAN_10004041	gi|808875608|gb|KKF24367.1|/1.20229e-134/Interferon-induced protein 44 [Larimichthys crocea]	P27473/2e-47/ IFI44_PANTR Interferon-induced protein 44 OS=Pan troglodytes GN=IFI44 PE=1 SV=1	NA	molecular_function:GO:0005525//GTP binding;
S.schlegelii_GLEAN_10008307	14.3908	-21.7075	3.91064	-5.55088	2.84e-08	9.79e-06	9.64998	0	0	0	0	0	S.schlegelii_GLEAN_10008307	gi|808863485|gb|KKF14808.1|/2.15214e-161/Ras-related protein Rab-27B [Larimichthys crocea]	O00194/3e-133/ RB27B_HUMAN Ras-related protein Rab-27B OS=Homo sapiens GN=RAB27B PE=1 SV=4	lcf:108901139/4e-160/ras-related protein Rab-27B-like; K07886 Ras-related protein Rab-27B	biological_process:GO:0006886//intracellular protein transport;GO:0006913//nucleocytoplasmic transport;GO:0007165//signal transduction;GO:0007264//small GTPase mediated signal transduction;GO:0015031//protein transport;cellular_component:GO:0005622//intracellular;GO:0016020//membrane;molecular_function:GO:0003924//GTPase activity;GO:0005525//GTP binding;
S.schlegelii_GLEAN_10019692	14.3908	-21.7075	3.91064	-5.55088	2.84e-08	9.79e-06	2.05502	0	0	0	0	0	S.schlegelii_GLEAN_10019692	gi|542223291|ref|XP_005451146.1|/4.42278e-133/PREDICTED: caldesmon [Oreochromis niloticus]	Q05682/2e-53/ CALD1_HUMAN Caldesmon OS=Homo sapiens GN=CALD1 PE=1 SV=3	lcf:108888482/1e-140/cald1; caldesmon; K12327 caldesmon	NA
S.schlegelii_GLEAN_10018075	14.3908	-21.7075	3.91064	-5.55088	2.84e-08	9.79e-06	1.84426	0	0	0	0	0	S.schlegelii_GLEAN_10018075	gi|734613164|ref|XP_010734075.1|/0/PREDICTED: protein argonaute-2 [Larimichthys crocea]	Q8CJG0/0.0/ AGO2_MOUSE Protein argonaute-2 OS=Mus musculus GN=Ago2 PE=1 SV=3	lco:104922835/0.0/ago2; protein argonaute-2; K11593 eukaryotic translation initiation factor 2C	molecular_function:GO:0003676//nucleic acid binding;GO:0005515//protein binding;
S.schlegelii_GLEAN_10003231	222.032	-11.5255	2.04827	-5.62693	1.83e-08	9.79e-06	13.6164	2.07486	57.3263	0	0	0	S.schlegelii_GLEAN_10003231	gi|808860178|gb|KKF12219.1|/0/Protein NLRC3 [Larimichthys crocea]	Q7RTR2/2e-66/ NLRC3_HUMAN NLR family CARD domain-containing protein 3 OS=Homo sapiens GN=NLRC3 PE=1 SV=2	lcf:108892181/0.0/NACHT, LRR and PYD domains-containing protein 12-like; K20865 NACHT, LRR and PYD domains-containing protein 12	NA
S.schlegelii_GLEAN_10002099	151.241	-10.9725	1.96955	-5.57105	2.53e-08	9.79e-06	12.4684	57.8959	13.242	0	0	0	S.schlegelii_GLEAN_10002099	gi|736251007|ref|XP_010788034.1|/1.9856e-164/PREDICTED: uncharacterized protein CXorf38 homolog [Notothenia coriiceps]	Q8C5K5/2e-69/ CX038_MOUSE Uncharacterized protein CXorf38 homolog OS=Mus musculus PE=1 SV=1	epa:110235238/1e-14/uncharacterized protein LOC110235238; K21440 ankyrin repeat domain-containing protein 50	NA
S.schlegelii_GLEAN_10000903	13.7985	-21.6465	3.91081	-5.53504	3.11e-08	9.94e-06	1.25667	0.000445768	0	0.000437235	0.000726085	0	S.schlegelii_GLEAN_10000903	gi|808880822|gb|KKF28546.1|/0/Deubiquitinating protein VCIP135 [Larimichthys crocea]	Q8CF97/0.0/ VCIP1_RAT Deubiquitinating protein VCIP135 OS=Rattus norvegicus GN=Vcpip1 PE=1 SV=2	lcf:108882463/0.0/vcpip1; deubiquitinating protein VCIP135; K11861 deubiquitinating protein VCIP135 [EC:3.4.19.12]	NA
S.schlegelii_GLEAN_10004374	13.7559	-21.6446	3.91082	-5.53453	3.12e-08	9.94e-06	13.0506	0	0	0	0	0	S.schlegelii_GLEAN_10004374	gi|974098713|ref|XP_015247966.1|/1.87227e-108/PREDICTED: fas apoptotic inhibitory molecule 1-like [Cyprinodon variegatus]	Q9WUD8/5e-88/ FAIM1_MOUSE Fas apoptotic inhibitory molecule 1 OS=Mus musculus GN=Faim PE=1 SV=1	NA	biological_process:GO:0043066//negative regulation of apoptotic process;
S.schlegelii_GLEAN_10017799	13.7559	-21.6446	3.91082	-5.53453	3.12e-08	9.94e-06	5.67659	0	0	0	0	0	S.schlegelii_GLEAN_10017799	gi|908517821|ref|XP_013121692.1|/0/PREDICTED: general transcription factor II-I repeat domain-containing protein 2B-like [Oreochromis niloticus]	Q86UP8/8e-73/ GTD2A_HUMAN General transcription factor II-I repeat domain-containing protein 2A OS=Homo sapiens GN=GTF2IRD2 PE=1 SV=2	gja:107122456/2e-62/zinc finger protein 208-like; K09228 KRAB domain-containing zinc finger protein	molecular_function:GO:0046983//protein dimerization activity;
S.schlegelii_GLEAN_10018812	102.717	-10.4136	1.98513	-5.24582	1.56e-07	4.84e-05	13.6298	14.9653	21.4949	0	0	0	S.schlegelii_GLEAN_10018812	gi|736238956|ref|XP_010784385.1|/0/PREDICTED: mesoderm-specific transcript homolog protein isoform X2 [Notothenia coriiceps]	Q5EB52/1e-167/ MEST_HUMAN Mesoderm-specific transcript homolog protein OS=Homo sapiens GN=MEST PE=2 SV=2	NA	molecular_function:GO:0003824//catalytic activity;
S.schlegelii_GLEAN_10015276	117.976	-10.6132	2.03099	-5.22563	1.74e-07	5.27e-05	826.682	183.778	554.536	0	0	0	S.schlegelii_GLEAN_10015276	gi|657546569|ref|XP_008278451.1|/1.85392e-43/PREDICTED: phosphatidylinositol N-acetylglucosaminyltransferase subunit Y [Stegastes partitus]	Q3MUY2/8e-37/ PIGY_HUMAN Phosphatidylinositol N-acetylglucosaminyltransferase subunit Y OS=Homo sapiens GN=PIGY PE=1 SV=1	pret:103466265/7e-44/pigy; phosphatidylinositol N-acetylglucosaminyltransferase subunit Y; K11001 phosphatidylinositol glycan anchor biosynthesis, class Y	NA
S.schlegelii_GLEAN_10000863	104.512	-10.4391	2.00321	-5.21118	1.88e-07	5.43e-05	9.88783	12.8329	5.60549	0	0	0	S.schlegelii_GLEAN_10000863	gi|734649230|ref|XP_010753885.1|/0/PREDICTED: TELO2-interacting protein 2 [Larimichthys crocea]	Q6NXR4/3e-87/ TTI2_HUMAN TELO2-interacting protein 2 OS=Homo sapiens GN=TTI2 PE=1 SV=1	csem:103376790/0.0/LOW QUALITY PROTEIN: uncharacterized protein LOC103376790; K08155 MFS transporter, DHA1 family, solute carrier family 18 (vesicular amine transporter), member 1/2	NA
S.schlegelii_GLEAN_10001888	230.871	11.0052	2.11027	5.21506	1.84e-07	5.43e-05	0	0	0	550.475	34.9224	20.5364	S.schlegelii_GLEAN_10001888	gi|734649535|ref|XP_010754058.1|/2.30502e-52/PREDICTED: Ig mu heavy chain disease protein-like [Larimichthys crocea]	P01763/2e-30/ HV348_HUMAN Immunoglobulin heavy variable 3-48 OS=Homo sapiens GN=IGHV3-48 PE=1 SV=2	xtr:101733806/4e-30/uncharacterized LOC101733806; K06856 immunoglobulin heavy chain	molecular_function:GO:0005515//protein binding;	protein binding
S.schlegelii_GLEAN_10002199	142.997	10.3141	1.98126	5.20585	1.93e-07	5.47e-05	0	0	0	33.728	4.94766	19.6158	S.schlegelii_GLEAN_10002199	gi|410914840|ref|XP_003970895.1|/0/PREDICTED: G protein-coupled receptor kinase 6 [Takifugu rubripes]	P43250/0.0/ GRK6_HUMAN G protein-coupled receptor kinase 6 OS=Homo sapiens GN=GRK6 PE=1 SV=2	tru:101074586/0.0/grk6; G protein-coupled receptor kinase 6; K08291 G protein-coupled receptor kinase [EC:2.7.11.16]	biological_process:GO:0006468//protein phosphorylation;GO:0007165//signal transduction;molecular_function:GO:0004672//protein kinase activity;GO:0004674//protein serine/threonine kinase activity;GO:0004703//G-protein coupled receptor kinase activity;GO:0005524//ATP binding;	ATP binding
S.schlegelii_GLEAN_10002320	133.412	10.2141	2.04243	5.00095	5.7e-07	0.000158033	0	0	0	64.2015	6.19255	19.6739	S.schlegelii_GLEAN_10002320	gi|808861774|gb|KKF13571.1|/1.57589e-174/C-X-C chemokine receptor type 6 [Larimichthys crocea]	Q9TV16/4e-51/ CXCR6_PANTR C-X-C chemokine receptor type 6 OS=Pan troglodytes GN=CXCR6 PE=2 SV=1	lco:104929216/3e-175/C-C chemokine receptor type 7-like; K04182 C-C chemokine receptor type 7	biological_process:GO:0007186//G-protein coupled receptor signaling pathway;cellular_component:GO:0016021//integral component of membrane;molecular_function:GO:0004930//G-protein coupled receptor activity;	G-protein coupled receptor activity
S.schlegelii_GLEAN_10004156	85.6669	-10.152	2.05197	-4.94742	7.52e-07	0.000203895	8.59618	7.45743	6.54103	0	0	0	S.schlegelii_GLEAN_10004156	gi|734616599|ref|XP_010735950.1|/0/PREDICTED: cholesterol side-chain cleavage enzyme, mitochondrial [Larimichthys crocea]	Q07217/0.0/ CP11A_ONCMY Cholesterol side-chain cleavage enzyme, mitochondrial OS=Oncorhynchus mykiss GN=cyp11a1 PE=2 SV=1	lcf:108886266/0.0/cholesterol side-chain cleavage enzyme, mitochondrial; K00498 cholesterol monooxygenase (side-chain-cleaving) [EC:1.14.15.6]	biological_process:GO:0055114//oxidation-reduction process;molecular_function:GO:0005506//iron ion binding;GO:0016705//oxidoreductase activity, acting on paired donors, with incorporation or reduction of molecular oxygen;GO:0020037//heme binding;
S.schlegelii_GLEAN_10011924	103.77	9.85129	2.0047	4.91409	8.92e-07	0.000236798	0	0	0	8.14877	9.68625	18.1486	S.schlegelii_GLEAN_10011924	gi|734599310|ref|XP_010751960.1|/0/PREDICTED: glycine--tRNA ligase-like [Larimichthys crocea]	Q5RBL1/0.0/ GARS_PONAB Glycine--tRNA ligase OS=Pongo abelii GN=GARS PE=2 SV=1	lco:104937430/0.0/glycine--tRNA ligase-like; K01880 glycyl-tRNA synthetase [EC:6.1.1.14]	biological_process:GO:0006418//tRNA aminoacylation for protein translation;GO:0006426//glycyl-tRNA aminoacylation;cellular_component:GO:0005737//cytoplasm;molecular_function:GO:0000166//nucleotide binding;GO:0004812//aminoacyl-tRNA ligase activity;GO:0004820//glycine-tRNA ligase activity;GO:0005524//ATP binding;
S.schlegelii_GLEAN_10016614	87.7272	-10.1857	2.07716	-4.90368	9.41e-07	0.000239716	3.68967	1.94637	6.47448	0	0	0	S.schlegelii_GLEAN_10016614	gi|736219763|ref|XP_010779542.1|/0/PREDICTED: patched domain-containing protein 1 [Notothenia coriiceps]	Q96NR3/0.0/ PTHD1_HUMAN Patched domain-containing protein 1 OS=Homo sapiens GN=PTCHD1 PE=2 SV=2	cpic:101953743/4e-10/NPC1L1; NPC1 like intracellular cholesterol transporter 1; K14461 Niemann-Pick C1-like protein 1	cellular_component:GO:0016020//membrane;molecular_function:GO:0008158//hedgehog receptor activity;
S.schlegelii_GLEAN_10000267	105.376	9.87365	2.01196	4.90748	9.23e-07	0.000239716	0	0	0	18.039	5.33146	7.96969	S.schlegelii_GLEAN_10000267	gi|554859839|ref|XP_005940049.1|/0/PREDICTED: B-cell receptor CD22-like [Haplochromis burtoni]	P20273/5e-25/ CD22_HUMAN B-cell receptor CD22 OS=Homo sapiens GN=CD22 PE=1 SV=2	ncc:104950783/0.0/B-cell receptor CD22-like isoform X1; K06467 CD22 antigen	molecular_function:GO:0005515//protein binding;
S.schlegelii_GLEAN_10016227	619.043	-5.00351	1.03022	-4.85674	1.19e-06	0.000292436	66.2837	59.8664	196.957	5.00208	6.39073	4.10713	S.schlegelii_GLEAN_10016227	gi|657748525|ref|XP_008309596.1|/1.04981e-95/PREDICTED: uncharacterized protein LOC103379725 isoform X3 [Cynoglossus semilaevis]	NA	npr:108801863/1e-07/glucagon-like peptide 2 receptor; K04582 glucagon-like peptide 2 receptor	NA
S.schlegelii_GLEAN_10022206	96.0771	9.74024	2.00477	4.85853	1.18e-06	0.000292436	0	0	0	47.4888	29.2486	37.6665	S.schlegelii_GLEAN_10022206	gi|432917669|ref|XP_004079545.1|/3.92489e-134/PREDICTED: B-cell lymphoma/leukemia 10 [Oryzias latipes]	Q9QYN5/3e-60/ BCL10_RAT B-cell lymphoma/leukemia 10 OS=Rattus norvegicus GN=Bcl10 PE=2 SV=1	nfu:107383821/2e-139/bcl10; B-cell lymphoma/leukemia 10; K07368 B-cell CLL/lymphoma 10	biological_process:GO:0042981//regulation of apoptotic process;
S.schlegelii_GLEAN_10014428	96.8452	9.75174	2.0122	4.8463	1.26e-06	0.00030243	0	0	0	72.6988	43.2666	88.8216	S.schlegelii_GLEAN_10014428	gi|734643646|ref|XP_010750819.1|/1.77007e-66/PREDICTED: CD83 antigen isoform X1 [Larimichthys crocea]	O88324/4e-08/ CD83_MOUSE CD83 antigen OS=Mus musculus GN=Cd83 PE=2 SV=1	lco:104936477/2e-64/cd83; CD83 molecule; K06510 CD83 antigen	molecular_function:GO:0005515//protein binding;
S.schlegelii_GLEAN_10016228	88.4027	-10.197	2.1363	-4.77321	1.81e-06	0.000427874	75.7405	134.311	544.792	0	0	0	S.schlegelii_GLEAN_10016228	NA	NA	NA	NA
S.schlegelii_GLEAN_10010638	98.6084	9.77792	2.07106	4.72121	2.34e-06	0.000543195	0	0	0	105.585	31.2185	21.425	S.schlegelii_GLEAN_10010638	gi|736233504|ref|XP_010783012.1|/1.30758e-83/PREDICTED: uncharacterized protein LOC104957097 [Notothenia coriiceps]	P40259/2e-11/ CD79B_HUMAN B-cell antigen receptor complex-associated protein beta chain OS=Homo sapiens GN=CD79B PE=1 SV=1	ncc:104957097/2e-84/uncharacterized protein LOC104957097; K06507 CD79B antigen	molecular_function:GO:0005515//protein binding;
S.schlegelii_GLEAN_10016823	77.9035	-10.0145	2.12662	-4.70911	2.49e-06	0.000566163	53.4005	51.6388	170.786	0	0	0	S.schlegelii_GLEAN_10016823	gi|229365926|gb|ACQ57943.1|/5.19565e-62/QIL1 [Anoplopoma fimbria] &gt;gi|229366780|gb|ACQ58370.1| QIL1 [Anoplopoma fimbria]	Q1LUK1/7e-49/ MIC13_DANRE MICOS complex subunit MIC13 OS=Danio rerio GN=mic13 PE=3 SV=1	NA	NA
S.schlegelii_GLEAN_10010121	95.9581	9.73828	2.11903	4.59564	4.31e-06	0.000964498	0	0	0	16.1964	12.5496	1.95314	S.schlegelii_GLEAN_10010121	gi|657587831|ref|XP_008298227.1|/0/PREDICTED: ataxin-1-like [Stegastes partitus] &gt;gi|657587833|ref|XP_008298228.1| PREDICTED: ataxin-1-like [Stegastes partitus] &gt;gi|657587835|ref|XP_008298229.1| PREDICTED: ataxin-1-like [Stegastes partitus] &gt;gi|657587837|ref|XP_008298230.1| PREDICTED: ataxin-1-like [Stegastes partitus]	P54254/7e-33/ ATX1_MOUSE Ataxin-1 OS=Mus musculus GN=Atxn1 PE=1 SV=2	epa:110245119/5e-08/HMG box-containing protein 1-like isoform X1; K21644 HMG box transcription factor 1	molecular_function:GO:0003723//RNA binding;GO:0005515//protein binding;
S.schlegelii_GLEAN_10004252	85.0931	9.56529	2.09356	4.56891	4.9e-06	0.00107714	0	0	0	28.5346	6.7534	21.0714	S.schlegelii_GLEAN_10004252	gi|736207228|ref|XP_010776174.1|/8.0569e-149/PREDICTED: GTPase IMAP family member 7-like isoform X1 [Notothenia coriiceps] &gt;gi|736207232|ref|XP_010776176.1| PREDICTED: GTPase IMAP family member 7-like isoform X2 [Notothenia coriiceps]	Q8NHV1/2e-39/ GIMA7_HUMAN GTPase IMAP family member 7 OS=Homo sapiens GN=GIMAP7 PE=1 SV=1	lco:104933598/1e-116/uncharacterized LOC104933598; K15261 poly [ADP-ribose] polymerase 10/14/15 [EC:2.4.2.30]	molecular_function:GO:0005525//GTP binding;
S.schlegelii_GLEAN_10012300	65.0354	-9.7542	2.17074	-4.4935	7.01e-06	0.00151321	2.27542	4.82817	6.77769	0	0	0	S.schlegelii_GLEAN_10012300	gi|808866813|gb|KKF17456.1|/0/Zinc finger and BTB domain-containing protein 20 [Larimichthys crocea]	Q9HC78/0.0/ ZBT20_HUMAN Zinc finger and BTB domain-containing protein 20 OS=Homo sapiens GN=ZBTB20 PE=1 SV=3	lco:104931198/0.0/zbtb20; zinc finger and BTB domain containing 20; K10501 zinc finger and BTB domain-containing protein 20	molecular_function:GO:0005515//protein binding;GO:0046872//metal ion binding;
S.schlegelii_GLEAN_10013258	87.0258	9.59766	2.14185	4.48102	7.43e-06	0.00157774	0	0	0	12.8205	3.13476	25.2766	S.schlegelii_GLEAN_10013258	gi|734644117|ref|XP_010751083.1|/0/PREDICTED: glutamate dehydrogenase, mitochondrial-like [Larimichthys crocea]	P00367/0.0/ DHE3_HUMAN Glutamate dehydrogenase 1, mitochondrial OS=Homo sapiens GN=GLUD1 PE=1 SV=2	lco:104936703/0.0/glutamate dehydrogenase, mitochondrial-like; K00261 glutamate dehydrogenase (NAD(P)+) [EC:1.4.1.3]	biological_process:GO:0006520//cellular amino acid metabolic process;GO:0055114//oxidation-reduction process;molecular_function:GO:0016491//oxidoreductase activity;
S.schlegelii_GLEAN_10023237	117.617	7.87645	1.76671	4.45825	8.26e-06	0.00164531	0	0.11408	0	29.3291	12.3647	11.6186	S.schlegelii_GLEAN_10023237	gi|657546250|ref|XP_008278338.1|/0/PREDICTED: serine/threonine-protein kinase PAK 2-like [Stegastes partitus] &gt;gi|657546253|ref|XP_008278340.1| PREDICTED: serine/threonine-protein kinase PAK 2-like [Stegastes partitus]	Q64303/0.0/ PAK2_RAT Serine/threonine-protein kinase PAK 2 OS=Rattus norvegicus GN=Pak2 PE=1 SV=1	csem:103379106/0.0/serine/threonine-protein kinase PAK 2-like; K04410 p21-activated kinase 2 [EC:2.7.11.1]	biological_process:GO:0006468//protein phosphorylation;molecular_function:GO:0004672//protein kinase activity;GO:0005524//ATP binding;
S.schlegelii_GLEAN_10018315	79.2767	9.46316	2.12025	4.46323	8.07e-06	0.00164531	0	0	0	8.89597	2.02867	4.2946	S.schlegelii_GLEAN_10018315	gi|734610180|ref|XP_010732435.1|/0/PREDICTED: testis-expressed sequence 2 protein-like [Larimichthys crocea]	Q8IWB9/0.0/ TEX2_HUMAN Testis-expressed protein 2 OS=Homo sapiens GN=TEX2 PE=1 SV=2	dya:Dyak_GE21274/1e-53/uncharacterized protein; K02602 cytoplasmic polyadenylation element-binding protein	NA
S.schlegelii_GLEAN_10004466	82.8518	9.52684	2.13663	4.45882	8.24e-06	0.00164531	0	0	0	16.147	2.36047	8.41856	S.schlegelii_GLEAN_10004466	gi|734620094|ref|XP_010737878.1|/0/PREDICTED: cAMP-specific 3&apos;,5&apos;-cyclic phosphodiesterase 4B-like isoform X1 [Larimichthys crocea]	P14646/0.0/ PDE4B_RAT cAMP-specific 3',5'-cyclic phosphodiesterase 4B OS=Rattus norvegicus GN=Pde4b PE=1 SV=4	lco:104925858/0.0/pde4b; phosphodiesterase 4B; K13293 cAMP-specific phosphodiesterase 4 [EC:3.1.4.53]	biological_process:GO:0007165//signal transduction;molecular_function:GO:0004114//3',5'-cyclic-nucleotide phosphodiesterase activity;GO:0008081//phosphoric diester hydrolase activity;
S.schlegelii_GLEAN_10015050	85.721	9.57556	2.14497	4.4642	8.04e-06	0.00164531	0	0	0	23.4072	16.8515	3.09939	S.schlegelii_GLEAN_10015050	gi|808869019|gb|KKF19197.1|/0/Protein FAM117A [Larimichthys crocea]	Q7TNF9/1e-59/ F117A_MOUSE Protein FAM117A OS=Mus musculus GN=Fam117a PE=1 SV=1	apla:101803377/9e-49/FAM117A; protein FAM117A; K15275 solute carrier family 35 (UDP-galactose transporter), member B1	NA
S.schlegelii_GLEAN_10003698	73.533	9.35463	2.13662	4.37825	1.2e-05	0.00234544	0	0	0	28.1616	8.09667	24.2199	S.schlegelii_GLEAN_10003698	gi|657550308|ref|XP_008279777.1|/0/PREDICTED: ras association domain-containing protein 2 [Stegastes partitus] &gt;gi|657550311|ref|XP_008279778.1| PREDICTED: ras association domain-containing protein 2 [Stegastes partitus] &gt;gi|657550314|ref|XP_008279779.1| PREDICTED: ras association domain-containing protein 2 [Stegastes partitus]	Q3B7D5/8e-137/ RASF2_RAT Ras association domain-containing protein 2 OS=Rattus norvegicus GN=Rassf2 PE=2 SV=1	lcf:108881821/0.0/rassf2; ras association domain-containing protein 2; K09851 Ras association domain-containing protein 2/4	biological_process:GO:0007165//signal transduction;
S.schlegelii_GLEAN_10018842	68.1858	9.24539	2.13047	4.33959	1.43e-05	0.0027561	0	0	0	9.28019	9.31271	10.3696	S.schlegelii_GLEAN_10018842	gi|734603829|ref|XP_010728942.1|/0/PREDICTED: inosine-5&apos;-monophosphate dehydrogenase 1b isoform X2 [Larimichthys crocea]	Q6GMG5/0.0/ IMDH1_DANRE Inosine-5'-monophosphate dehydrogenase 1a OS=Danio rerio GN=impdh1a PE=2 SV=1	lcf:108889258/0.0/inosine-5'-monophosphate dehydrogenase 1b isoform X1; K00088 IMP dehydrogenase [EC:1.1.1.205]	biological_process:GO:0055114//oxidation-reduction process;molecular_function:GO:0003824//catalytic activity;GO:0016491//oxidoreductase activity;
S.schlegelii_GLEAN_10018052	261.713	-10.0572	2.3219	-4.33146	1.48e-05	0.00277577	49.4261	24.1934	0	0.125172	0	0	S.schlegelii_GLEAN_10018052	gi|323650240|gb|ADX97206.1|/0/biotinidase, partial [Perca flavescens]	Q8AV84/0.0/ BTD_TAKRU Biotinidase OS=Takifugu rubripes GN=btd PE=3 SV=1	lco:109139331/0.0/biotinidase-like; K01435 biotinidase [EC:3.5.1.12]	biological_process:GO:0006807//nitrogen compound metabolic process;molecular_function:GO:0016810//hydrolase activity, acting on carbon-nitrogen (but not peptide) bonds;GO:0016811//hydrolase activity, acting on carbon-nitrogen (but not peptide) bonds, in linear amides;
S.schlegelii_GLEAN_10011076	73.3357	-9.92682	2.29012	-4.33464	1.46e-05	0.00277577	6.41089	3.28874	46.7351	0	0	0	S.schlegelii_GLEAN_10011076	gi|974089870|ref|XP_015243126.1|/1.11948e-67/PREDICTED: cytokine-dependent hematopoietic cell linker [Cyprinodon variegatus]	Q9QZE2/5e-28/ CLNK_MOUSE Cytokine-dependent hematopoietic cell linker OS=Mus musculus GN=Clnk PE=1 SV=1	csem:103390605/5e-44/hs3st1; heparan sulfate glucosamine 3-O-sulfotransferase 1; K01024 [heparan sulfate]-glucosamine 3-sulfotransferase 1 [EC:2.8.2.23]	NA
S.schlegelii_GLEAN_10003998	57.5809	-9.57878	2.22023	-4.31433	1.6e-05	0.00290479	2.91928	7.01702	7.26643	0	0	0	S.schlegelii_GLEAN_10003998	gi|908510058|ref|XP_005474175.2|/0/PREDICTED: peroxisomal N(1)-acetyl-spermine/spermidine oxidase-like [Oreochromis niloticus]	Q8C0L6/6e-149/ PAOX_MOUSE Peroxisomal N(1)-acetyl-spermine/spermidine oxidase OS=Mus musculus GN=Paox PE=1 SV=3	lcf:108888274/0.0/peroxisomal N(1)-acetyl-spermine/spermidine oxidase-like isoform X1; K00308 N1-acetylpolyamine oxidase [EC:1.5.3.13]	biological_process:GO:0055114//oxidation-reduction process;molecular_function:GO:0016491//oxidoreductase activity;
S.schlegelii_GLEAN_10009928	78.8632	9.45562	2.19251	4.31268	1.61e-05	0.00290479	0	0	0	21.7879	3.3005	32.5929	S.schlegelii_GLEAN_10009928	gi|808882284|gb|KKF29692.1|/0/Deoxyribonuclease-2-beta [Larimichthys crocea]	Q8WZ79/1e-108/ DNS2B_HUMAN Deoxyribonuclease-2-beta OS=Homo sapiens GN=DNASE2B PE=2 SV=1	lco:104931942/0.0/deoxyribonuclease-2-beta-like; K01158 deoxyribonuclease II [EC:3.1.22.1]	biological_process:GO:0006259//DNA metabolic process;molecular_function:GO:0004531//deoxyribonuclease II activity;
S.schlegelii_GLEAN_10005417	84.0614	9.54775	2.21427	4.31192	1.62e-05	0.00290479	0	0	0	49.9279	6.99457	4.7936	S.schlegelii_GLEAN_10005417	gi|808879934|gb|KKF27905.1|/0/Beta-1,3-N-acetylglucosaminyltransferase manic fringe [Larimichthys crocea]	Q5YB40/1e-160/ MFNG_DANRE Beta-1,3-N-acetylglucosaminyltransferase manic fringe OS=Danio rerio GN=mfng PE=2 SV=3	lco:104925295/0.0/beta-1,3-N-acetylglucosaminyltransferase manic fringe-like; K05948 fringe [EC:2.4.1.222]	cellular_component:GO:0016020//membrane;molecular_function:GO:0016757//transferase activity, transferring glycosyl groups;
S.schlegelii_GLEAN_10005022	68.9504	-9.83778	2.3148	-4.24995	2.14e-05	0.00378429	2.16344	1.29298	17.4026	0	0	0	S.schlegelii_GLEAN_10005022	gi|734649367|ref|XP_010753963.1|/0/PREDICTED: shootin-1 [Larimichthys crocea]	Q6P0R8/1e-146/ SHOT1_DANRE Shootin-1 OS=Danio rerio GN=shtn1 PE=2 SV=2	xma:102237123/2e-13/ankyrin-3-like; K10380 ankyrin	NA
S.schlegelii_GLEAN_10014340	73.0087	9.34435	2.20394	4.23983	2.24e-05	0.0039047	0	0	0	10.7111	2.01046	1.95312	S.schlegelii_GLEAN_10014340	gi|542211439|ref|XP_005478556.1|/0/PREDICTED: protein FAM65B isoform X1 [Oreochromis niloticus]	Q1LU99/0.0/ RIPR2_DANRE Rho family-interacting cell polarization regulator 2 OS=Danio rerio GN=ripor2 PE=2 SV=1	NA	NA
S.schlegelii_GLEAN_10016400	66.0969	9.20052	2.17899	4.22238	2.42e-05	0.00416269	0	0	0	8.01728	5.5343	2.4475	S.schlegelii_GLEAN_10016400	gi|548532790|ref|XP_005752066.1|/0/PREDICTED: breast carcinoma-amplified sequence 3 isoform X3 [Pundamilia nyererei] &gt;gi|939315375|ref|XP_014263222.1| PREDICTED: breast carcinoma-amplified sequence 3 isoform X3 [Maylandia zebra]	Q9H6U6/0.0/ BCAS3_HUMAN Breast carcinoma-amplified sequence 3 OS=Homo sapiens GN=BCAS3 PE=1 SV=3	ncc:104958691/2e-09/cpa6; carboxypeptidase A6; K08782 carboxypeptidase A6 [EC:3.4.17.1]	molecular_function:GO:0005515//protein binding;
S.schlegelii_GLEAN_10010775	64.2847	-9.73706	2.32231	-4.19284	2.75e-05	0.00455905	9.80566	0.838412	10.17	0	0	0	S.schlegelii_GLEAN_10010775	gi|734620933|ref|XP_010738339.1|/0/PREDICTED: origin recognition complex subunit 4 [Larimichthys crocea]	Q5R6Z7/0.0/ ORC4_PONAB Origin recognition complex subunit 4 OS=Pongo abelii GN=ORC4 PE=2 SV=1	lcf:108873089/0.0/orc4; origin recognition complex subunit 4; K02606 origin recognition complex subunit 4	NA
S.schlegelii_GLEAN_10001984	62.6857	9.12414	2.17764	4.18991	2.79e-05	0.00455905	0	0	0	2.10079	1.94645	3.37809	S.schlegelii_GLEAN_10001984	gi|808886096|gb|KKF32758.1|/0/Interferon-induced very large GTPase 1 [Larimichthys crocea]	Q80SU7/1e-176/ GVIN1_MOUSE Interferon-induced very large GTPase 1 OS=Mus musculus GN=Gvin1 PE=1 SV=1	mdo:100018349/5e-58/CARD6; caspase recruitment domain family member 6; K12797 caspase recruitment domain-containing protein 6	molecular_function:GO:0005515//protein binding;GO:0005525//GTP binding;
S.schlegelii_GLEAN_10001601	65.1698	9.18026	2.19074	4.19049	2.78e-05	0.00455905	0	0	0	10.1262	5.10991	2.76465	S.schlegelii_GLEAN_10001601	gi|972978360|ref|XP_015205639.1|/0/PREDICTED: striatin-3 isoform X2 [Lepisosteus oculatus]	Q9ERG2/0.0/ STRN3_MOUSE Striatin-3 OS=Mus musculus GN=Strn3 PE=1 SV=1	lco:104933626/0.0/strn3, Striatin-3; striatin 3; K17608 striatin 1/3/4	molecular_function:GO:0005515//protein binding;
S.schlegelii_GLEAN_10014312	68.1598	9.24525	2.20646	4.19007	2.79e-05	0.00455905	0	0	0	11.855	2.01143	4.03571	S.schlegelii_GLEAN_10014312	gi|808877494|gb|KKF25953.1|/0/E3 ubiquitin-protein ligase RNF19A [Larimichthys crocea]	P50636/0.0/ RN19A_MOUSE E3 ubiquitin-protein ligase RNF19A OS=Mus musculus GN=Rnf19a PE=1 SV=2	lco:104918640/0.0/E3 ubiquitin-protein ligase RNF19A-like; K11972 E3 ubiquitin-protein ligase RNF19A [EC:2.3.2.27]	biological_process:GO:0016567//protein ubiquitination;molecular_function:GO:0004842//ubiquitin-protein transferase activity;GO:0005515//protein binding;GO:0008270//zinc ion binding;
S.schlegelii_GLEAN_10023315	68.2591	9.2466	2.2145	4.17549	2.97e-05	0.00479639	0	0	0	3.10264	16.0298	11.0366	S.schlegelii_GLEAN_10023315	gi|808863684|gb|KKF14972.1|/0/Serine/threonine-protein phosphatase 2A regulatory subunit B alpha isoform [Larimichthys crocea]	P63150/0.0/ 2ABA_RABIT Serine/threonine-protein phosphatase 2A 55 kDa regulatory subunit B alpha isoform OS=Oryctolagus cuniculus GN=PPP2R2A PE=2 SV=1	lco:104921711/0.0/serine/threonine-protein phosphatase 2A 55 kDa regulatory subunit B alpha isoform; K04354 serine/threonine-protein phosphatase 2A regulatory subunit B	cellular_component:GO:0000159//protein phosphatase type 2A complex;molecular_function:GO:0005515//protein binding;GO:0008601//protein phosphatase type 2A regulator activity;
S.schlegelii_GLEAN_10004205	60.7306	9.07843	2.18099	4.16253	3.15e-05	0.00501354	0	0	0	14.1995	10.6637	13.7867	S.schlegelii_GLEAN_10004205	gi|734648414|ref|XP_010753437.1|/0/PREDICTED: transcriptional regulator Myc-2-like [Larimichthys crocea]	Q90341/4e-29/ MYC1_CYPCA Transcriptional regulator Myc-1 OS=Cyprinus carpio GN=myca PE=3 SV=1	lcf:108874403/0.0/transcriptional regulator Myc-2-like; K04377 Myc proto-oncogene protein	biological_process:GO:0006355//regulation of transcription, DNA-templated;cellular_component:GO:0005634//nucleus;molecular_function:GO:0003700//sequence-specific DNA binding transcription factor activity;GO:0046983//protein dimerization activity;
S.schlegelii_GLEAN_10016481	63.3787	9.14002	2.20015	4.15427	3.26e-05	0.00513392	0	0	0	5.86641	3.21023	1.63715	S.schlegelii_GLEAN_10016481	gi|657578741|ref|XP_008293257.1|/0/PREDICTED: carboxypeptidase D isoform X1 [Stegastes partitus]	O75976/0.0/ CBPD_HUMAN Carboxypeptidase D OS=Homo sapiens GN=CPD PE=1 SV=2	lcf:108890362/0.0/cpd; LOW QUALITY PROTEIN: carboxypeptidase D; K07752 carboxypeptidase D [EC:3.4.17.22]	biological_process:GO:0006508//proteolysis;molecular_function:GO:0004181//metallocarboxypeptidase activity;GO:0004185//serine-type carboxypeptidase activity;GO:0008270//zinc ion binding;
S.schlegelii_GLEAN_10002182	61.1028	9.08695	2.1932	4.14323	3.42e-05	0.00523946	0	0	0	13.4318	21.5019	13.0289	S.schlegelii_GLEAN_10002182	gi|657556375|ref|XP_008282475.1|/0/PREDICTED: puromycin-sensitive aminopeptidase [Stegastes partitus]	A6NEC2/2e-172/ PSAL_HUMAN Puromycin-sensitive aminopeptidase-like protein OS=Homo sapiens GN=NPEPPSL1 PE=2 SV=3	lco:104933025/0.0/npepps; aminopeptidase puromycin sensitive; K08776 puromycin-sensitive aminopeptidase [EC:3.4.11.-]	biological_process:GO:0006508//proteolysis;molecular_function:GO:0008237//metallopeptidase activity;GO:0008270//zinc ion binding;
S.schlegelii_GLEAN_10017212	61.4568	9.09553	2.19452	4.14465	3.4e-05	0.00523946	0	0	0	3.88996	4.67529	7.95896	S.schlegelii_GLEAN_10017212	gi|768911734|ref|XP_011613385.1|/0/PREDICTED: son of sevenless homolog 2, partial [Takifugu rubripes]	Q07890/0.0/ SOS2_HUMAN Son of sevenless homolog 2 OS=Homo sapiens GN=SOS2 PE=1 SV=2	lcf:108886692/0.0/sos2; LOW QUALITY PROTEIN: son of sevenless homolog 2; K03099 son of sevenless	biological_process:GO:0035023//regulation of Rho protein signal transduction;molecular_function:GO:0003677//DNA binding;GO:0005089//Rho guanyl-nucleotide exchange factor activity;
S.schlegelii_GLEAN_10022044	61.4604	9.09581	2.19638	4.14128	3.45e-05	0.00523946	0	0	0	11.0716	5.717	14.5403	S.schlegelii_GLEAN_10022044	gi|808859114|gb|KKF11321.1|/0/GPI-anchor transamidase [Larimichthys crocea]	Q5R6L8/0.0/ GPI8_PONAB GPI-anchor transamidase OS=Pongo abelii GN=PIGK PE=2 SV=1	lcf:108884269/0.0/pigk; GPI-anchor transamidase; K05290 phosphatidylinositol glycan, class K [EC:2.6.-.-]	biological_process:GO:0006508//proteolysis;GO:0016255//attachment of GPI anchor to protein;cellular_component:GO:0042765//GPI-anchor transamidase complex;molecular_function:GO:0003923//GPI-anchor transamidase activity;GO:0008233//peptidase activity;
S.schlegelii_GLEAN_10004298	147.942	-10.9405	2.67459	-4.09053	4.3e-05	0.00637735	0	48.842	2.81287	0	0	0	S.schlegelii_GLEAN_10004298	gi|657544163|ref|XP_008277579.1|/0/PREDICTED: angiopoietin-related protein 4-like [Stegastes partitus]	Q2KJ51/2e-83/ ANGL4_BOVIN Angiopoietin-related protein 4 OS=Bos taurus GN=ANGPTL4 PE=2 SV=1	lcf:108877442/0.0/LOW QUALITY PROTEIN: angiopoietin-related protein 4-like; K08767 angiopoietin-like 4	biological_process:GO:0001525//angiogenesis;GO:0043066//negative regulation of apoptotic process;cellular_component:GO:0005615//extracellular space;
S.schlegelii_GLEAN_10022772	115.829	7.87056	1.92381	4.09112	4.29e-05	0.00637735	0	0.0701774	0	22.204	1.14513	9.66581	S.schlegelii_GLEAN_10022772	gi|583972459|ref|XP_006781640.1|/0/PREDICTED: zinc finger protein 711-like [Neolamprologus brichardi]	A7Y7X5/0.0/ ZN711_DANRE Zinc finger protein 711 OS=Danio rerio GN=znf711 PE=1 SV=1	pgc:109852311/6e-51/uncharacterized protein LOC109852311; K15196 transcription factor IIIB 90 kDa subunit	biological_process:GO:0006355//regulation of transcription, DNA-templated;cellular_component:GO:0005634//nucleus;molecular_function:GO:0003677//DNA binding;GO:0046872//metal ion binding;
S.schlegelii_GLEAN_10021948	57.8365	9.00791	2.20669	4.08209	4.46e-05	0.00653736	0	0	0	12.7823	10.6559	8.53458	S.schlegelii_GLEAN_10021948	gi|657595638|ref|XP_008302488.1|/0/PREDICTED: NAD(P) transhydrogenase, mitochondrial-like [Stegastes partitus]	Q13423/0.0/ NNTM_HUMAN NAD(P) transhydrogenase, mitochondrial OS=Homo sapiens GN=NNT PE=1 SV=3	lcf:108879262/0.0/LOW QUALITY PROTEIN: NAD(P) transhydrogenase, mitochondrial-like; K00323 NAD(P) transhydrogenase [EC:1.6.1.2]	biological_process:GO:0055114//oxidation-reduction process;molecular_function:GO:0016491//oxidoreductase activity;
S.schlegelii_GLEAN_10010531	58.2183	9.01762	2.21677	4.0679	4.74e-05	0.00686936	0	0	0	12.3428	5.26202	6.36326	S.schlegelii_GLEAN_10010531	gi|657567683|ref|XP_008287235.1|/0/PREDICTED: RCC1 and BTB domain-containing protein 1 [Stegastes partitus]	Q8NDN9/0.0/ RCBT1_HUMAN RCC1 and BTB domain-containing protein 1 OS=Homo sapiens GN=RCBTB1 PE=1 SV=1	lcf:108901282/0.0/rcbtb1; LOW QUALITY PROTEIN: RCC1 and BTB domain-containing protein 1; K11494 RCC1 and BTB domain-containing protein	molecular_function:GO:0005515//protein binding;
S.schlegelii_GLEAN_10016907	141.327	-10.8745	2.68388	-4.05179	5.08e-05	0.00727741	1.04317	30.6136	0	0	0	0	S.schlegelii_GLEAN_10016907	gi|736211589|ref|XP_010777379.1|/0/PREDICTED: E-selectin [Notothenia coriiceps]	Q95LG1/3e-160/ LYAM2_HORSE E-selectin OS=Equus caballus GN=SELE PE=2 SV=1	ncc:104952281/0.0/sele; E-selectin; K06494 selectin, endothelial cell	biological_process:GO:0007155//cell adhesion;cellular_component:GO:0016020//membrane;molecular_function:GO:0005515//protein binding;
S.schlegelii_GLEAN_10004911	346.463	6.99168	1.72871	4.04445	5.24e-05	0.00742589	0	1.03262	0	117.329	13.3893	75.4064	S.schlegelii_GLEAN_10004911	gi|736153845|ref|XP_010765082.1|/2.24601e-171/PREDICTED: LOW QUALITY PROTEIN: stonustoxin subunit beta-like [Notothenia coriiceps]	A0ZSK3/3e-108/ STXA_SYNVE Neoverrucotoxin subunit alpha OS=Synanceia verrucosa PE=1 SV=1	lco:109140851/2e-131/neoverrucotoxin subunit beta-like; K12006 tripartite motif-containing protein 16	molecular_function:GO:0005515//protein binding;
S.schlegelii_GLEAN_10011895	53.9843	-9.48527	2.35671	-4.02478	5.7e-05	0.00798577	4.7548	0.627224	3.11827	0	0	0	S.schlegelii_GLEAN_10011895	gi|317419980|emb|CBN82016.1|/0/Short transient receptor potential channel 1 [Dicentrarchus labrax]	P48995/0.0/ TRPC1_HUMAN Short transient receptor potential channel 1 OS=Homo sapiens GN=TRPC1 PE=1 SV=1	lcf:108881675/0.0/trpc1; short transient receptor potential channel 1; K04964 transient receptor potential cation channel subfamily C member 1	biological_process:GO:0006811//ion transport;GO:0055085//transmembrane transport;GO:0070588//calcium ion transmembrane transport;cellular_component:GO:0016020//membrane;GO:0016021//integral component of membrane;molecular_function:GO:0005216//ion channel activity;GO:0005262//calcium channel activity;GO:0005515//protein binding;
S.schlegelii_GLEAN_10013497	55.7535	8.95505	2.23741	4.00241	6.27e-05	0.00868462	0	0	0	2.91392	3.03694	5.48176	S.schlegelii_GLEAN_10013497	gi|808862812|gb|KKF14270.1|/0/Pleckstrin domain-containing family M member 2 [Larimichthys crocea]	Q8IWE5/0.0/ PKHM2_HUMAN Pleckstrin homology domain-containing family M member 2 OS=Homo sapiens GN=PLEKHM2 PE=1 SV=2	lco:104927140/0.0/plekhm2; pleckstrin homology and RUN domain containing M2; K15348 pleckstrin homology domain-containing family M member 2	NA
S.schlegelii_GLEAN_10000258	51.588	-9.41937	2.3568	-3.99667	6.42e-05	0.00871768	2.00604	3.40287	14.2364	0	0	0	S.schlegelii_GLEAN_10000258	gi|734614425|ref|XP_010734769.1|/0/PREDICTED: gastrula zinc finger protein XlCGF57.1-like [Larimichthys crocea]	Q5RCD9/9e-69/ ZSCA2_PONAB Zinc finger and SCAN domain-containing protein 2 OS=Pongo abelii GN=ZSCAN2 PE=2 SV=1	mze:101470432/0.0/gastrula zinc finger protein XlCGF57.1-like; K09228 KRAB domain-containing zinc finger protein	molecular_function:GO:0046872//metal ion binding;
S.schlegelii_GLEAN_10007831	58.1007	9.01481	2.25572	3.99642	6.43e-05	0.00871768	0	0	0	22.7028	6.42571	6.27985	S.schlegelii_GLEAN_10007831	gi|657594299|ref|XP_008301755.1|/0/PREDICTED: BRO1 domain-containing protein BROX [Stegastes partitus]	A3KQV2/0.0/ BROX_DANRE BRO1 domain-containing protein BROX OS=Danio rerio GN=brox PE=2 SV=1	crg:105327720/1e-12/programmed cell death 6-interacting protein isoform X1; K12200 programmed cell death 6-interacting protein	NA
S.schlegelii_GLEAN_10006268	48.6838	-9.33613	2.3408	-3.98843	6.65e-05	0.00892179	3.18162	7.45667	15.956	0	0	0	S.schlegelii_GLEAN_10006268	gi|736212112|ref|XP_010777532.1|/5.15103e-120/PREDICTED: mesenteric estrogen-dependent adipogenesis protein [Notothenia coriiceps]	A4IFN2/2e-12/ MEDAG_BOVIN Mesenteric estrogen-dependent adipogenesis protein OS=Bos taurus GN=MEDAG PE=2 SV=1	NA	NA
S.schlegelii_GLEAN_10013994	54.0302	8.90967	2.24111	3.97556	7.02e-05	0.00903764	0	0	0	3.9697	4.45651	5.4672	S.schlegelii_GLEAN_10013994	gi|657571175|ref|XP_008289146.1|/0/PREDICTED: anaphase-promoting complex subunit 2 [Stegastes partitus]	Q8BZQ7/0.0/ ANC2_MOUSE Anaphase-promoting complex subunit 2 OS=Mus musculus GN=Anapc2 PE=1 SV=2	lcf:108878205/0.0/anapc2; LOW QUALITY PROTEIN: anaphase-promoting complex subunit 2; K03349 anaphase-promoting complex subunit 2	biological_process:GO:0006511//ubiquitin-dependent protein catabolic process;molecular_function:GO:0031625//ubiquitin protein ligase binding;
S.schlegelii_GLEAN_10017219	57.632	9.00266	2.26365	3.97705	6.98e-05	0.00903764	0	0	0	2.53383	2.38883	0.620955	S.schlegelii_GLEAN_10017219	gi|941779071|ref|XP_014324323.1|/0/PREDICTED: ninein [Xiphophorus maculatus]	Q61043/0.0/ NIN_MOUSE Ninein OS=Mus musculus GN=Nin PE=1 SV=3	xma:102234770/0.0/nin; ninein; K16476 ninein	biological_process:GO:0034454//microtubule anchoring at centrosome;cellular_component:GO:0005813//centrosome;molecular_function:GO:0005509//calcium ion binding;
S.schlegelii_GLEAN_10018338	58.966	9.03552	2.27012	3.98019	6.89e-05	0.00903764	0	0	0	3.66858	16.2621	15.0346	S.schlegelii_GLEAN_10018338	gi|736183265|ref|XP_010769307.1|/0/PREDICTED: protein NLRC3-like, partial [Notothenia coriiceps]	Q7RTR2/7e-25/ NLRC3_HUMAN NLR family CARD domain-containing protein 3 OS=Homo sapiens GN=NLRC3 PE=1 SV=2	lcf:108880127/0.0/NACHT, LRR and PYD domains-containing protein 14-like; K20865 NACHT, LRR and PYD domains-containing protein 12	NA
S.schlegelii_GLEAN_10014692	60.9501	9.08364	2.28111	3.9821	6.83e-05	0.00903764	0	0	0	4.35794	7.91282	26.89	S.schlegelii_GLEAN_10014692	gi|348539732|ref|XP_003457343.1|/0/PREDICTED: GDP-mannose 4,6 dehydratase [Oreochromis niloticus]	Q8K0C9/0.0/ GMDS_MOUSE GDP-mannose 4,6 dehydratase OS=Mus musculus GN=Gmds PE=1 SV=1	lcf:108879588/0.0/gmds; GDP-mannose 4,6 dehydratase; K01711 GDPmannose 4,6-dehydratase [EC:4.2.1.47]	NA
S.schlegelii_GLEAN_10012069	53.6178	8.89882	2.24697	3.96036	7.48e-05	0.0095364	0	0	0	8.22036	4.25684	5.88528	S.schlegelii_GLEAN_10012069	gi|835964184|ref|XP_012777986.1|/0/PREDICTED: phosphatidylinositol-binding clathrin assembly protein-like isoform X1 [Maylandia zebra]	Q7M6Y3/0.0/ PICAL_MOUSE Phosphatidylinositol-binding clathrin assembly protein OS=Mus musculus GN=Picalm PE=1 SV=1	csem:103384989/0.0/phosphatidylinositol-binding clathrin assembly protein-like isoform X1; K20044 phosphatidylinositol-binding clathrin assembly protein	molecular_function:GO:0005543//phospholipid binding;
S.schlegelii_GLEAN_10022886	54.8395	8.93113	2.25841	3.95461	7.67e-05	0.00961603	0	0	0	1.33131	2.05627	3.40777	S.schlegelii_GLEAN_10022886	gi|808864555|gb|KKF15614.1|/0/hypothetical protein EH28_07344 [Larimichthys crocea]	A0JM08/0.0/ C170B_XENTR Centrosomal protein of 170 kDa protein B OS=Xenopus tropicalis GN=cep170b PE=2 SV=1	lcf:108892518/0.0/LOW QUALITY PROTEIN: centrosomal protein of 170 kDa protein B-like; K16463 centrosomal protein CEP170	molecular_function:GO:0005515//protein binding;
S.schlegelii_GLEAN_10012342	60.2948	9.06812	2.29361	3.95364	7.7e-05	0.00961603	0	0	0	6.08581	6.7761	33.2485	S.schlegelii_GLEAN_10012342	gi|736195548|ref|XP_010772602.1|/5.90642e-165/PREDICTED: uncharacterized protein PB18E9.04c-like [Notothenia coriiceps]	Q9D7V1/2e-22/ SH24A_MOUSE SH2 domain-containing protein 4A OS=Mus musculus GN=Sh2d4a PE=1 SV=1	ncc:104948137/1e-165/uncharacterized protein PB18E9.04c-like; K17577 SH2 domain-containing protein 4A	NA
S.schlegelii_GLEAN_10009309	106.438	-10.4652	2.65244	-3.9455	7.96e-05	0.00985202	18.0154	7.18718	0	0	0	0	S.schlegelii_GLEAN_10009309	gi|734596937|ref|XP_010739533.1|/0/PREDICTED: solute carrier family 2, facilitated glucose transporter member 5 [Larimichthys crocea]	Q8WMN1/0.0/ GTR5_SHEEP Solute carrier family 2, facilitated glucose transporter member 5 OS=Ovis aries GN=SLC2A5 PE=2 SV=1	lcf:108876545/0.0/slc2a5; solute carrier family 2, facilitated glucose transporter member 5 isoform X1; K08143 MFS transporter, SP family, solute carrier family 2 (facilitated glucose/fructose transporter), member 5	biological_process:GO:0055085//transmembrane transport;cellular_component:GO:0016020//membrane;GO:0016021//integral component of membrane;molecular_function:GO:0022857//transmembrane transporter activity;GO:0022891//substrate-specific transmembrane transporter activity;
S.schlegelii_GLEAN_10007240	52.8982	8.87902	2.25663	3.93463	8.33e-05	0.0102095	0	0	0	10.6852	11.8527	7.18391	S.schlegelii_GLEAN_10007240	gi|657546827|ref|XP_008278547.1|/0/PREDICTED: zinc finger protein ubi-d4 isoform X1 [Stegastes partitus]	Q61103/1e-176/ REQU_MOUSE Zinc finger protein ubi-d4 OS=Mus musculus GN=Dpf2 PE=1 SV=1	lcf:108872618/0.0/zinc finger protein ubi-d4-like isoform X1; K13196 zinc finger protein ubi-d4	molecular_function:GO:0005515//protein binding;GO:0008270//zinc ion binding;
S.schlegelii_GLEAN_10019923	44.937	-9.22097	2.3458	-3.93084	8.46e-05	0.0102733	1.50008	3.04073	3.57994	0	0	0	S.schlegelii_GLEAN_10019923	gi|657566552|ref|XP_008286622.1|/0/PREDICTED: dipeptidyl peptidase 4-like [Stegastes partitus]	P97321/0.0/ SEPR_MOUSE Prolyl endopeptidase FAP OS=Mus musculus GN=Fap PE=1 SV=1	lcf:108901051/0.0/dipeptidyl peptidase 4-like; K01278 dipeptidyl-peptidase 4 [EC:3.4.14.5]	biological_process:GO:0006508//proteolysis;molecular_function:GO:0004252//serine-type endopeptidase activity;GO:0008236//serine-type peptidase activity;
S.schlegelii_GLEAN_10017525	53.2644	8.88933	2.26707	3.92107	8.82e-05	0.0105978	0	0	0	7.49565	3.05022	3.15633	S.schlegelii_GLEAN_10017525	gi|734613904|ref|XP_010734481.1|/0/PREDICTED: uncharacterized protein LOC104923168 [Larimichthys crocea]	A8MVM7/1e-14/ YD021_HUMAN Putative uncharacterized protein ENSP00000382790 OS=Homo sapiens PE=5 SV=3	NA	NA
S.schlegelii_GLEAN_10002436	131.782	-7.24202	1.84831	-3.91818	8.92e-05	0.0106254	24.0131	9.55655	54.8404	0	0.918655	0	S.schlegelii_GLEAN_10002436	gi|443697339|gb|ELT97850.1|/1.65063e-39/hypothetical protein CAPTEDRAFT_87466, partial [Capitella teleta]	NA	sasa:106608808/2e-12/poln; DNA polymerase nu; K16618 DNA polymerase nu [EC:2.7.7.7]	NA
S.schlegelii_GLEAN_10021340	59.0064	9.03635	2.31473	3.90384	9.47e-05	0.0111711	0	0	0	11.906	26.5947	3.01998	S.schlegelii_GLEAN_10021340	gi|583992539|ref|XP_006791443.1|/0/PREDICTED: dual specificity mitogen-activated protein kinase kinase 6-like [Neolamprologus brichardi]	Q9DGE0/0.0/ MP2K6_DANRE Dual specificity mitogen-activated protein kinase kinase 6 OS=Danio rerio GN=map2k6 PE=1 SV=2	mze:101473145/0.0/dual specificity mitogen-activated protein kinase kinase 6-like; K04433 mitogen-activated protein kinase kinase 6 [EC:2.7.12.2]	biological_process:GO:0006468//protein phosphorylation;molecular_function:GO:0004672//protein kinase activity;GO:0005524//ATP binding;
S.schlegelii_GLEAN_10022666	53.102	8.885	2.2823	3.893	9.9e-05	0.0115755	0	0	0	6.16239	2.31932	8.06101	S.schlegelii_GLEAN_10022666	gi|657540714|ref|XP_008276356.1|/0/PREDICTED: long-chain-fatty-acid--CoA ligase 4 [Stegastes partitus] &gt;gi|657540717|ref|XP_008276357.1| PREDICTED: long-chain-fatty-acid--CoA ligase 4 [Stegastes partitus] &gt;gi|657540720|ref|XP_008276358.1| PREDICTED: long-chain-fatty-acid--CoA ligase 4 [Stegastes partitus] &gt;gi|657540723|ref|XP_008276359.1| PREDICTED: long-chain-fatty-acid--CoA ligase 4 [S…	O60488/0.0/ ACSL4_HUMAN Long-chain-fatty-acid--CoA ligase 4 OS=Homo sapiens GN=ACSL4 PE=1 SV=2	lcf:108882774/0.0/acsl4; long-chain-fatty-acid--CoA ligase 4; K01897 long-chain acyl-CoA synthetase [EC:6.2.1.3]	biological_process:GO:0008152//metabolic process;molecular_function:GO:0003824//catalytic activity;
S.schlegelii_GLEAN_10019469	53.4926	8.89523	2.29007	3.88427	0.000102639	0.0118903	0	0	0	6.45793	4.83592	1.6337	S.schlegelii_GLEAN_10019469	gi|831540432|ref|XP_012724369.1|/0/PREDICTED: B-cell lymphoma/leukemia 11B-like isoform X1 [Fundulus heteroclitus]	Q99PV8/0.0/ BC11B_MOUSE B-cell lymphoma/leukemia 11B OS=Mus musculus GN=Bcl11b PE=1 SV=1	pret:103457828/0.0/B-cell lymphoma/leukemia 11B-like isoform X1; K22046 B-cell lymphoma/leukemia 11B	molecular_function:GO:0046872//metal ion binding;
S.schlegelii_GLEAN_10022692	45.6866	-9.24415	2.38217	-3.88055	0.00010422	0.0118907	4.73476	4.24551	16.7278	0	0	0	S.schlegelii_GLEAN_10022692	gi|229366028|gb|ACQ57994.1|/0/Probable tRNAHis guanylyltransferase [Anoplopoma fimbria]	Q9NWX6/4e-151/ THG1_HUMAN Probable tRNA(His) guanylyltransferase OS=Homo sapiens GN=THG1L PE=1 SV=2	lco:104924232/0.0/thg1l; tRNA-histidine guanylyltransferase 1 like; K10761 tRNA(His) guanylyltransferase [EC:2.7.7.79]	biological_process:GO:0006400//tRNA modification;molecular_function:GO:0000287//magnesium ion binding;GO:0008193//tRNA guanylyltransferase activity;
S.schlegelii_GLEAN_10014705	55.9314	8.96	2.30935	3.87988	0.000104509	0.0118907	0	0	0	6.84483	1.16735	1.5552	S.schlegelii_GLEAN_10014705	gi|657565011|ref|XP_008285779.1|/0/PREDICTED: probable cation-transporting ATPase 13A3 [Stegastes partitus]	Q9H7F0/0.0/ AT133_HUMAN Probable cation-transporting ATPase 13A3 OS=Homo sapiens GN=ATP13A3 PE=1 SV=4	lco:104939924/0.0/atp13a3; ATPase 13A3; K14951 cation-transporting P-type ATPase 13A3/4/5 [EC:3.6.3.-]	biological_process:GO:0006812//cation transport;cellular_component:GO:0016021//integral component of membrane;molecular_function:GO:0000166//nucleotide binding;GO:0016887//ATPase activity;GO:0046872//metal ion binding;
S.schlegelii_GLEAN_10012486	53.8614	8.9047	2.29713	3.87644	0.000105994	0.011953	0	0	0	14.8901	48.6432	18.5966	S.schlegelii_GLEAN_10012486	gi|657570112|ref|XP_008288572.1|/2.0426e-149/PREDICTED: ras-related protein Rab-30 [Stegastes partitus] &gt;gi|734626979|ref|XP_010741657.1| PREDICTED: ras-related protein Rab-30 [Larimichthys crocea] &gt;gi|734626981|ref|XP_010741658.1| PREDICTED: ras-related protein Rab-30 [Larimichthys crocea]	Q923S9/8e-135/ RAB30_MOUSE Ras-related protein Rab-30 OS=Mus musculus GN=Rab30 PE=1 SV=1	lcf:108876187/4e-150/rab30; ras-related protein Rab-30; K07917 Ras-related protein Rab-30	biological_process:GO:0006886//intracellular protein transport;GO:0006913//nucleocytoplasmic transport;GO:0007165//signal transduction;GO:0007264//small GTPase mediated signal transduction;GO:0015031//protein transport;cellular_component:GO:0005622//intracellular;GO:0016020//membrane;molecular_function:GO:0003924//GTPase activity;GO:0005525//GTP binding;
S.schlegelii_GLEAN_10005060	50.7323	8.81876	2.29161	3.84828	0.000118948	0.0131804	0	0	0	4.59309	7.34026	10.4444	S.schlegelii_GLEAN_10005060	gi|657530891|ref|XP_008299479.1|/0/PREDICTED: carcinoembryonic antigen-related cell adhesion molecule 1-like isoform X3 [Stegastes partitus]	P06731/4e-32/ CEAM5_HUMAN Carcinoembryonic antigen-related cell adhesion molecule 5 OS=Homo sapiens GN=CEACAM5 PE=1 SV=3	lcf:108892148/0.0/carcinoembryonic antigen-related cell adhesion molecule 5-like; K06499 carcinoembryonic antigen-related cell adhesion molecule	molecular_function:GO:0005515//protein binding;
S.schlegelii_GLEAN_10021350	56.9654	8.98611	2.3341	3.84992	0.000118157	0.0131804	0	0	0	50.2344	19.9641	177.553	S.schlegelii_GLEAN_10021350	gi|386307219|gb|AFJ05589.1|/5.41488e-72/immmunoglobulin light chain [Epinephelus coioides]	P01715/3e-11/ LV301_HUMAN Immunoglobulin lambda variable 3-1 OS=Homo sapiens GN=IGLV3-1 PE=1 SV=2	cpic:101950118/4e-11/immunoglobulin iota chain-like; K06553 pre-B lymphocyte gene	molecular_function:GO:0005515//protein binding;
S.schlegelii_GLEAN_10000842	50.4861	8.81214	2.29639	3.83738	0.000124354	0.0136607	0	0	0	7.17159	2.34645	4.9525	S.schlegelii_GLEAN_10000842	gi|657586738|ref|XP_008297631.1|/0/PREDICTED: LON peptidase N-terminal domain and RING finger protein 2 [Stegastes partitus]	Q1L5Z9/0.0/ LONF2_HUMAN LON peptidase N-terminal domain and RING finger protein 2 OS=Homo sapiens GN=LONRF2 PE=2 SV=3	ccar:109082385/2e-09/zinc-binding protein A33-like; K12015 tripartite motif-containing protein 39 [EC:2.3.2.27]	biological_process:GO:0006508//proteolysis;molecular_function:GO:0004176//ATP-dependent peptidase activity;GO:0005515//protein binding;GO:0008270//zinc ion binding;
S.schlegelii_GLEAN_10010303	43.7121	-9.18052	2.39445	-3.83408	0.000126036	0.0137271	1.17392	1.72084	4.70106	0	0	0	S.schlegelii_GLEAN_10010303	gi|657577998|ref|XP_008292853.1|/0/PREDICTED: ATP-binding cassette sub-family B member 9 [Stegastes partitus]	Q9JJ59/0.0/ ABCB9_MOUSE ATP-binding cassette sub-family B member 9 OS=Mus musculus GN=Abcb9 PE=2 SV=1	lcf:108878461/0.0/abcb9; ATP-binding cassette sub-family B member 9; K05656 ATP-binding cassette, subfamily B (MDR/TAP), member 9	biological_process:GO:0006810//transport;GO:0015833//peptide transport;GO:0055085//transmembrane transport;cellular_component:GO:0005765//lysosomal membrane;GO:0016021//integral component of membrane;molecular_function:GO:0005524//ATP binding;GO:0015440//peptide-transporting ATPase activity;GO:0016887//ATPase activity;GO:0042626//ATPase activity, coupled to transmembrane movement of substances;
S.schlegelii_GLEAN_10021840	50.7964	8.82026	2.3056	3.82559	0.000130462	0.0140888	0	0	0	13.3057	35.1717	18.8888	S.schlegelii_GLEAN_10021840	gi|736224075|ref|XP_010780723.1|/5.68078e-154/PREDICTED: sigma non-opioid intracellular receptor 1 [Notothenia coriiceps]	Q7ZWG9/7e-144/ SGMR1_DANRE Sigma non-opioid intracellular receptor 1 OS=Danio rerio GN=sigmar1 PE=2 SV=1	ncc:104955174/1e-154/sigmar1; sigma non-opioid intracellular receptor 1; K20719 sigma non-opioid intracellular receptor	NA
S.schlegelii_GLEAN_10000474	51.7737	8.84793	2.3183	3.81657	0.000135322	0.0144909	0	0	0	2.41725	8.19758	9.38684	S.schlegelii_GLEAN_10000474	gi|974058609|ref|XP_015226367.1|/0/PREDICTED: protein FAM111A-like [Cyprinodon variegatus]	Q96PZ2/1e-36/ F111A_HUMAN Protein FAM111A OS=Homo sapiens GN=FAM111A PE=1 SV=2	NA	NA
S.schlegelii_GLEAN_10001563	119.409	10.054	2.63996	3.8084	0.00013987	0.014853	0	0	0	493.122	0	195.826	S.schlegelii_GLEAN_10001563	gi|734649535|ref|XP_010754058.1|/1.51306e-50/PREDICTED: Ig mu heavy chain disease protein-like [Larimichthys crocea]	P01763/4e-32/ HV348_HUMAN Immunoglobulin heavy variable 3-48 OS=Homo sapiens GN=IGHV3-48 PE=1 SV=2	xtr:101733806/1e-32/uncharacterized LOC101733806; K06856 immunoglobulin heavy chain	molecular_function:GO:0005515//protein binding;	protein binding
S.schlegelii_GLEAN_10018040	49.354	8.77877	2.30886	3.80221	0.000143413	0.0151034	0	0	0	3.80259	6.96898	3.27647	S.schlegelii_GLEAN_10018040	gi|734644389|ref|XP_010751230.1|/0/PREDICTED: transcription factor Sp4 [Larimichthys crocea]	Q62445/0.0/ SP4_MOUSE Transcription factor Sp4 OS=Mus musculus GN=Sp4 PE=2 SV=2	lco:104936835/0.0/sp4; Sp4 transcription factor; K09194 transcription factor Sp4	biological_process:GO:0006357//regulation of transcription from RNA polymerase II promoter;cellular_component:GO:0005634//nucleus;molecular_function:GO:0003700//sequence-specific DNA binding transcription factor activity;GO:0003713//transcription coactivator activity;GO:0046872//metal ion binding;
S.schlegelii_GLEAN_10015010	163.336	-6.65222	1.75346	-3.79377	0.000148376	0.015498	85.1357	102.994	116.21	5.2328	0	0	S.schlegelii_GLEAN_10015010	gi|736215586|ref|XP_010778466.1|/3.15137e-64/PREDICTED: nestin-like isoform X1 [Notothenia coriiceps]	NA	NA	NA
S.schlegelii_GLEAN_10001522	93.3987	-10.2771	2.71739	-3.78198	0.000155583	0.0161187	0.98264	7.80614	0	0	0	0	S.schlegelii_GLEAN_10001522	gi|808870846|gb|KKF20635.1|/0/A disintegrin and metalloproteinase with thrombospondin motifs 2 [Larimichthys crocea]	P79331/0.0/ ATS2_BOVIN A disintegrin and metalloproteinase with thrombospondin motifs 2 OS=Bos taurus GN=ADAMTS2 PE=1 SV=1	lcf:108873642/0.0/LOW QUALITY PROTEIN: A disintegrin and metalloproteinase with thrombospondin motifs 2-like; K08618 a disintegrin and metalloproteinase with thrombospondin motifs 2 [EC:3.4.24.14]	biological_process:GO:0006508//proteolysis;cellular_component:GO:0005578//proteinaceous extracellular matrix;GO:0031012//extracellular matrix;molecular_function:GO:0004222//metalloendopeptidase activity;GO:0008233//peptidase activity;GO:0008237//metallopeptidase activity;GO:0008270//zinc ion binding;
S.schlegelii_GLEAN_10005572	49.9266	8.79536	2.33185	3.77183	0.000162053	0.0166536	0	0	0	2.16476	7.91586	5.34348	S.schlegelii_GLEAN_10005572	gi|499039531|ref|XP_004570399.1|/0/PREDICTED: E3 ubiquitin-protein ligase TRAF7 [Maylandia zebra] &gt;gi|499039533|ref|XP_004570400.1| PREDICTED: E3 ubiquitin-protein ligase TRAF7 [Maylandia zebra] &gt;gi|554863564|ref|XP_005941859.1| PREDICTED: E3 ubiquitin-protein ligase TRAF7 isoform X1 [Haplochromis burtoni] &gt;gi|554863566|ref|XP_005941860.1| PREDICTED: E3 ubiquitin-protein ligase TRAF7 iso…	Q6Q0C0/0.0/ TRAF7_HUMAN E3 ubiquitin-protein ligase TRAF7 OS=Homo sapiens GN=TRAF7 PE=1 SV=1	mze:101486481/0.0/traf7; TNF receptor associated factor 7; K10646 E3 ubiquitin-protein ligase TRAF7 [EC:2.3.2.27]	molecular_function:GO:0005515//protein binding;GO:0008270//zinc ion binding;GO:0046872//metal ion binding;
S.schlegelii_GLEAN_10011022	42.2229	-9.13094	2.43279	-3.75327	0.00017454	0.0177933	9.89295	2.96953	4.78353	0	0	0	S.schlegelii_GLEAN_10011022	gi|734626445|ref|XP_010741364.1|/0/PREDICTED: tRNA wybutosine-synthesizing protein 2 homolog [Larimichthys crocea]	Q0P466/1e-154/ TYW2_DANRE tRNA wybutosine-synthesizing protein 2 homolog OS=Danio rerio GN=trmt12 PE=2 SV=1	lco:104928726/0.0/trmt12; tRNA methyltransferase 12 homolog; K07055 tRNA wybutosine-synthesizing protein 2 [EC:2.5.1.114]	NA
S.schlegelii_GLEAN_10014745	49.8255	8.79231	2.34573	3.74822	0.000178095	0.0180116	0	0	0	2.67534	7.10521	1.81064	S.schlegelii_GLEAN_10014745	gi|734604524|ref|XP_010729321.1|/0/PREDICTED: circadian locomoter output cycles protein kaput [Larimichthys crocea]	Q6YGZ4/0.0/ CLOCK_TYTAL Circadian locomoter output cycles protein kaput OS=Tyto alba GN=CLOCK PE=2 SV=1	lco:104919094/0.0/clock; clock circadian regulator; K02223 circadian locomoter output cycles kaput protein [EC:2.3.1.48]	biological_process:GO:0006355//regulation of transcription, DNA-templated;cellular_component:GO:0005634//nucleus;GO:0005667//transcription factor complex;GO:0005737//cytoplasm;molecular_function:GO:0003700//sequence-specific DNA binding transcription factor activity;GO:0046983//protein dimerization activity;
S.schlegelii_GLEAN_10012968	46.2083	8.68405	2.31993	3.74325	0.000181659	0.0181428	0	0	0	10.7481	9.73623	8.42197	S.schlegelii_GLEAN_10012968	gi|961900681|ref|XP_014855943.1|/0/PREDICTED: transcription factor SOX-4-like [Poecilia mexicana]	Q06831/1e-66/ SOX4_MOUSE Transcription factor SOX-4 OS=Mus musculus GN=Sox4 PE=1 SV=2	lcf:108889134/0.0/transcription factor SOX-4-like; K09268 transcription factor SOX4/11/12 (SOX group C)	NA
S.schlegelii_GLEAN_10019253	49.6928	8.78942	2.34981	3.74049	0.000183664	0.0181428	0	0	0	5.98624	0.942643	2.73418	S.schlegelii_GLEAN_10019253	gi|657573664|ref|XP_008290505.1|/0/PREDICTED: apoptosis-stimulating of p53 protein 1 isoform X1 [Stegastes partitus]	Q62415/0.0/ ASPP1_MOUSE Apoptosis-stimulating of p53 protein 1 OS=Mus musculus GN=Ppp1r13b PE=1 SV=2	pret:103457581/0.0/ppp1r13b; apoptosis-stimulating of p53 protein 1 isoform X1; K17554 apoptosis-stimulating of p53 protein 1	biological_process:GO:0006915//apoptotic process;GO:0045786//negative regulation of cell cycle;molecular_function:GO:0005515//protein binding;GO:0008134//transcription factor binding;
S.schlegelii_GLEAN_10008399	52.8393	8.87701	2.37311	3.74067	0.000183533	0.0181428	0	0	0	3.40206	8.85167	0.975244	S.schlegelii_GLEAN_10008399	gi|939291247|ref|XP_014265553.1|/0/PREDICTED: exocyst complex component 6 isoform X2 [Maylandia zebra]	Q8TAG9/0.0/ EXOC6_HUMAN Exocyst complex component 6 OS=Homo sapiens GN=EXOC6 PE=1 SV=3	lcf:108876768/0.0/exoc6; exocyst complex component 6 isoform X1; K19985 exocyst complex component 6	biological_process:GO:0006904//vesicle docking involved in exocytosis;cellular_component:GO:0000145//exocyst;
S.schlegelii_GLEAN_10014240	46.9056	8.70538	2.33259	3.73206	0.000189917	0.0186163	0	0	0	7.2692	14.5299	8.72433	S.schlegelii_GLEAN_10014240	gi|657805884|ref|XP_008330105.1|/4.38899e-81/PREDICTED: pygopus homolog 2-like isoform X1 [Cynoglossus semilaevis] &gt;gi|657805886|ref|XP_008330106.1| PREDICTED: pygopus homolog 2-like isoform X1 [Cynoglossus semilaevis]	Q9BRQ0/3e-42/ PYGO2_HUMAN Pygopus homolog 2 OS=Homo sapiens GN=PYGO2 PE=1 SV=2	fpg:101919976/1e-39/SHC1; SHC adaptor protein 1; K06279 SHC-transforming protein 1	molecular_function:GO:0005515//protein binding;
S.schlegelii_GLEAN_10003481	48.6878	8.75964	2.36325	3.70662	0.000210048	0.0204323	0	0	0	2.35831	2.67199	9.61298	S.schlegelii_GLEAN_10003481	gi|734647013|ref|XP_010752674.1|/0/PREDICTED: trimethylguanosine synthase [Larimichthys crocea]	Q923W1/6e-122/ TGS1_MOUSE Trimethylguanosine synthase OS=Mus musculus GN=Tgs1 PE=1 SV=2	lcf:108896732/0.0/tgs1; trimethylguanosine synthase; K14292 trimethylguanosine synthase [EC:2.1.1.-]	biological_process:GO:0001510//RNA methylation;GO:0009452//7-methylguanosine RNA capping;molecular_function:GO:0008168//methyltransferase activity;
S.schlegelii_GLEAN_10022179	91.4803	-10.2472	2.77613	-3.69118	0.000223213	0.0215486	1.43066	29.6149	0	0	0	0	S.schlegelii_GLEAN_10022179	gi|808861072|gb|KKF12969.1|/0/Vimentin [Larimichthys crocea] &gt;gi|808867696|gb|KKF18211.1| Vimentin [Larimichthys crocea]	P48674/0.0/ VIME_ONCMY Vimentin OS=Oncorhynchus mykiss GN=vim PE=2 SV=1	lcf:108883291/0.0/vim; vimentin; K07606 vimentin	cellular_component:GO:0005882//intermediate filament;molecular_function:GO:0005198//structural molecule activity;
S.schlegelii_GLEAN_10011599	39.9414	-9.0505	2.46289	-3.67475	0.000238081	0.022811	4.26899	10.0385	24.2207	0	0	0	S.schlegelii_GLEAN_10011599	gi|734609485|ref|XP_010732049.1|/3.19029e-100/PREDICTED: regulator of G-protein signaling 21-like [Larimichthys crocea]	Q0P5H5/1e-42/ RGS2_BOVIN Regulator of G-protein signaling 2 OS=Bos taurus GN=RGS2 PE=2 SV=1	lco:104921266/6e-101/regulator of G-protein signaling 21-like; K18154 regulator of G-protein signaling 2	NA
S.schlegelii_GLEAN_10020541	51.3821	8.83652	2.40622	3.67237	0.000240315	0.0228532	0	0	0	3.12844	24.2263	4.80448	S.schlegelii_GLEAN_10020541	gi|657535338|ref|XP_008274419.1|/0/PREDICTED: spectrin beta chain, non-erythrocytic 1-like isoform X3 [Stegastes partitus]	Q9QWN8/0.0/ SPTN2_RAT Spectrin beta chain, non-erythrocytic 2 OS=Rattus norvegicus GN=Sptbn2 PE=1 SV=2	bpec:110158618/0.0/spectrin beta chain, non-erythrocytic 1-like; K06115 spectrin beta	molecular_function:GO:0005515//protein binding;
S.schlegelii_GLEAN_10017127	48.3591	8.74911	2.3912	3.65887	0.000253328	0.0239123	0	0	0	1.42917	7.35511	2.09504	S.schlegelii_GLEAN_10017127	gi|908524021|ref|XP_013128371.1|/0/PREDICTED: serine-rich adhesin for platelets-like [Oreochromis niloticus]	Q8R361/2e-17/ RFIP5_MOUSE Rab11 family-interacting protein 5 OS=Mus musculus GN=Rab11fip5 PE=1 SV=2	lco:104936095/0.0/rab11 family-interacting protein 1-like; K12484 Rab11 family-interacting protein 1/2/5	NA
S.schlegelii_GLEAN_10020311	45.6749	8.66748	2.372	3.65408	0.000258105	0.0241841	0	0	0	4.4289	4.11437	12.6383	S.schlegelii_GLEAN_10020311	gi|734606903|ref|XP_010730617.1|/0/PREDICTED: ADP-dependent glucokinase-like [Larimichthys crocea]	Q8VDL4/2e-65/ ADPGK_MOUSE ADP-dependent glucokinase OS=Mus musculus GN=Adpgk PE=1 SV=2	lcf:108877019/0.0/ADP-dependent glucokinase-like; K08074 ADP-dependent glucokinase [EC:2.7.1.147]	biological_process:GO:0005975//carbohydrate metabolic process;molecular_function:GO:0016773//phosphotransferase activity, alcohol group as acceptor;
S.schlegelii_GLEAN_10000588	39.0284	-9.01758	2.476	-3.64199	0.000270535	0.0251637	0.253514	1.25587	1.48132	0	0	0	S.schlegelii_GLEAN_10000588	gi|928051411|ref|XP_013874861.1|/0/PREDICTED: protein TANC2-like isoform X2 [Austrofundulus limnaeus]	Q9HCD6/0.0/ TANC2_HUMAN Protein TANC2 OS=Homo sapiens GN=TANC2 PE=1 SV=3	lak:106153074/8e-95/ankyrin repeat domain-containing protein 50-like; K21440 ankyrin repeat domain-containing protein 50	molecular_function:GO:0005515//protein binding;
S.schlegelii_GLEAN_10017226	38.3413	-8.99138	2.4712	-3.63846	0.00027427	0.0253262	10.8354	9.91189	33.066	0	0	0	S.schlegelii_GLEAN_10017226	gi|657735116|ref|XP_008311001.1|/1.02677e-94/PREDICTED: dual specificity protein phosphatase 23 isoform X2 [Cynoglossus semilaevis]	Q6NT99/2e-64/ DUS23_MOUSE Dual specificity protein phosphatase 23 OS=Mus musculus GN=Dusp23 PE=1 SV=1	csem:103380718/4e-95/dusp23; dual specificity protein phosphatase 23 isoform X1; K14165 atypical dual specificity phosphatase [EC:3.1.3.16 3.1.3.48]	biological_process:GO:0006470//protein dephosphorylation;GO:0016311//dephosphorylation;molecular_function:GO:0004725//protein tyrosine phosphatase activity;GO:0008138//protein tyrosine/serine/threonine phosphatase activity;GO:0016791//phosphatase activity;
S.schlegelii_GLEAN_10016544	156.454	6.27833	1.72935	3.63045	0.000282933	0.0259382	0	0.253122	0	11.1676	7.08416	12.2055	S.schlegelii_GLEAN_10016544	gi|584010098|ref|XP_006799985.1|/0/PREDICTED: huntingtin-interacting protein 1-like isoform X3 [Neolamprologus brichardi]	O00291/0.0/ HIP1_HUMAN Huntingtin-interacting protein 1 OS=Homo sapiens GN=HIP1 PE=1 SV=5	lco:104924165/0.0/hip1; huntingtin interacting protein 1; K04559 huntingtin interacting protein 1	biological_process:GO:0006897//endocytosis;GO:0006915//apoptotic process;GO:0048268//clathrin coat assembly;GO:0072583//clathrin-mediated endocytosis;cellular_component:GO:0030136//clathrin-coated vesicle;molecular_function:GO:0003779//actin binding;GO:0005543//phospholipid binding;GO:0030276//clathrin binding;GO:0035091//phosphatidylinositol binding;
S.schlegelii_GLEAN_10008330	46.494	8.69338	2.39625	3.62791	0.000285729	0.0260074	0	0	0	8.10291	1.70179	11.5739	S.schlegelii_GLEAN_10008330	gi|617472555|ref|XP_007575906.1|/0/PREDICTED: phosphatidylinositol 4-phosphate 5-kinase type-1 beta isoform X1 [Poecilia formosa] &gt;gi|617472558|ref|XP_007575907.1| PREDICTED: phosphatidylinositol 4-phosphate 5-kinase type-1 beta isoform X1 [Poecilia formosa] &gt;gi|617472562|ref|XP_007575908.1| PREDICTED: phosphatidylinositol 4-phosphate 5-kinase type-1 beta isoform X1 [Poecilia formosa] &gt;g…	Q5ZJ58/0.0/ PI51B_CHICK Phosphatidylinositol 4-phosphate 5-kinase type-1 beta OS=Gallus gallus GN=PIP5K1B PE=2 SV=1	lcf:108901122/0.0/phosphatidylinositol 4-phosphate 5-kinase type-1 beta-like isoform X1; K00889 1-phosphatidylinositol-4-phosphate 5-kinase [EC:2.7.1.68]	biological_process:GO:0046488//phosphatidylinositol metabolic process;molecular_function:GO:0016307//phosphatidylinositol phosphate kinase activity;
S.schlegelii_GLEAN_10010521	42.5633	8.56555	2.36555	3.62095	0.000293525	0.0263408	0	0	0	17.0687	15.1827	17.1673	S.schlegelii_GLEAN_10010521	gi|498986585|ref|XP_004551319.1|/3.45539e-167/PREDICTED: MIT domain-containing protein 1 [Maylandia zebra] &gt;gi|548379157|ref|XP_005733946.1| PREDICTED: MIT domain-containing protein 1 [Pundamilia nyererei] &gt;gi|554864402|ref|XP_005942266.1| PREDICTED: MIT domain-containing protein 1 [Haplochromis burtoni]	Q5I0J5/1e-118/ MITD1_RAT MIT domain-containing protein 1 OS=Rattus norvegicus GN=Mitd1 PE=2 SV=1	nai:NECAME_14029/3e-40/MIT domain protein; K06698 proteasome activator subunit 3 (PA28 gamma)	NA
S.schlegelii_GLEAN_10001415	52.7615	8.87562	2.45017	3.62245	0.000291821	0.0263408	0	0	0	0.4028	0.853247	6.30644	S.schlegelii_GLEAN_10001415	gi|657564976|ref|XP_008285761.1|/0/PREDICTED: sterile alpha motif domain-containing protein 9-like [Stegastes partitus]	Q69Z37/3e-170/ SAM9L_MOUSE Sterile alpha motif domain-containing protein 9-like OS=Mus musculus GN=Samd9l PE=1 SV=2	NA	NA
S.schlegelii_GLEAN_10018664	60.5046	9.07318	2.51057	3.614	0.000301512	0.0268683	0	0	0	21.0135	6.18445	0.14837	S.schlegelii_GLEAN_10018664	gi|498961617|ref|XP_004545459.1|/0/PREDICTED: protein phosphatase Slingshot homolog 3 [Maylandia zebra]	Q5XIS1/2e-121/ SSH3_RAT Protein phosphatase Slingshot homolog 3 OS=Rattus norvegicus GN=Ssh3 PE=1 SV=1	mze:101467348/0.0/ssh3; protein phosphatase Slingshot homolog 3; K05766 protein phosphatase slingshot [EC:3.1.3.16 3.1.3.48]	biological_process:GO:0006470//protein dephosphorylation;molecular_function:GO:0008138//protein tyrosine/serine/threonine phosphatase activity;
S.schlegelii_GLEAN_10020100	116.81	6.51316	1.80737	3.60366	0.00031377	0.027575	0.126335	0	0	12.432	3.97633	7.46789	S.schlegelii_GLEAN_10020100	gi|688606959|ref|XP_005173974.2|/0/PREDICTED: folliculin-interacting protein 1 isoform X3 [Danio rerio]	Q5W4S4/0.0/ FNIP1_CHICK Folliculin-interacting protein 1 OS=Gallus gallus GN=FNIP1 PE=3 SV=1	ncc:104943232/0.0/LOW QUALITY PROTEIN: folliculin-interacting protein 1-like; K20400 folliculin-interacting protein 1	NA
S.schlegelii_GLEAN_10007718	42.6327	8.56788	2.37751	3.60372	0.000313696	0.027575	0	0	0	167.713	159.357	288.751	S.schlegelii_GLEAN_10007718	gi|928055097|ref|XP_013876838.1|/4.77198e-36/PREDICTED: cortexin-2-like [Austrofundulus limnaeus]	Q4LDR2/6e-21/ CTXN3_HUMAN Cortexin-3 OS=Homo sapiens GN=CTXN3 PE=1 SV=1	NA	cellular_component:GO:0031224//intrinsic component of membrane;
S.schlegelii_GLEAN_10009127	43.6805	8.60247	2.39156	3.59702	0.000321888	0.0280946	0	0	0	4.36988	11.6182	5.15208	S.schlegelii_GLEAN_10009127	gi|808859234|gb|KKF11424.1|/0/Heparan-sulfate 6-O-sulfotransferase 2 [Larimichthys crocea]	Q800H9/0.0/ H6ST2_DANRE Heparan-sulfate 6-O-sulfotransferase 2 OS=Danio rerio GN=hs6st2 PE=2 SV=2	lco:104925546/0.0/heparan-sulfate 6-O-sulfotransferase 2; K08102 heparan sulfate 6-O-sulfotransferase HS6ST2 [EC:2.8.2.-]	cellular_component:GO:0016021//integral component of membrane;molecular_function:GO:0008146//sulfotransferase activity;
S.schlegelii_GLEAN_10002109	38.4835	-8.99678	2.50377	-3.59329	0.000326528	0.0281145	3.93515	10.4696	29.3527	0	0	0	S.schlegelii_GLEAN_10002109	gi|317419825|emb|CBN81861.1|/3.13774e-123/Methionine-R-sulfoxide reductase B2, mitochondrial [Dicentrarchus labrax]	Q6NW52/1e-103/ MSRB2_DANRE Methionine-R-sulfoxide reductase B2, mitochondrial OS=Danio rerio GN=msrb2 PE=2 SV=1	lcf:108900764/7e-123/msrb2; methionine-R-sulfoxide reductase B2, mitochondrial; K07305 peptide-methionine (R)-S-oxide reductase [EC:1.8.4.12]	biological_process:GO:0006979//response to oxidative stress;GO:0030091//protein repair;GO:0055114//oxidation-reduction process;molecular_function:GO:0016671//oxidoreductase activity, acting on a sulfur group of donors, disulfide as acceptor;GO:0033743//peptide-methionine (R)-S-oxide reductase activity;
S.schlegelii_GLEAN_10016023	44.0321	8.61489	2.39651	3.59476	0.000324691	0.0281145	0	0	0	35.1548	9.59454	10.1261	S.schlegelii_GLEAN_10016023	gi|734612408|ref|XP_010733657.1|/1.07872e-159/PREDICTED: chloride intracellular channel protein 1 [Larimichthys crocea]	Q9Y696/6e-123/ CLIC4_HUMAN Chloride intracellular channel protein 4 OS=Homo sapiens GN=CLIC4 PE=1 SV=4	ncc:104953775/2e-153/clic1; chloride intracellular channel protein 1; K05021 chloride intracellular channel protein 1	molecular_function:GO:0005515//protein binding;
S.schlegelii_GLEAN_10011704	44.6018	8.63255	2.40551	3.58865	0.000332389	0.028427	0	0	0	0.648742	2.84409	1.50503	S.schlegelii_GLEAN_10011704	gi|734636654|ref|XP_010746978.1|/0/PREDICTED: phosphatidylinositol 4,5-bisphosphate 3-kinase catalytic subunit alpha isoform [Larimichthys crocea]	P42336/0.0/ PK3CA_HUMAN Phosphatidylinositol 4,5-bisphosphate 3-kinase catalytic subunit alpha isoform OS=Homo sapiens GN=PIK3CA PE=1 SV=2	lco:104933269/0.0/pik3ca; phosphatidylinositol-4,5-bisphosphate 3-kinase catalytic subunit alpha; K00922 phosphatidylinositol-4,5-bisphosphate 3-kinase catalytic subunit alpha/beta/delta [EC:2.7.1.153]	biological_process:GO:0046854//phosphatidylinositol phosphorylation;GO:0048015//phosphatidylinositol-mediated signaling;molecular_function:GO:0004075//biotin carboxylase activity;GO:0005524//ATP binding;GO:0016773//phosphotransferase activity, alcohol group as acceptor;GO:0046872//metal ion binding;
S.schlegelii_GLEAN_10000322	42.9818	8.58002	2.39906	3.57641	0.000348343	0.0295929	0	0	0	42.1065	13.7678	13.296	S.schlegelii_GLEAN_10000322	gi|658920542|ref|XP_008400004.1|/1.37199e-135/PREDICTED: chromatin complexes subunit BAP18 isoform X1 [Poecilia reticulata]	Q32LD1/2e-75/ BAP18_BOVIN Chromatin complexes subunit BAP18 OS=Bos taurus GN=BAP18 PE=2 SV=1	NA	NA
S.schlegelii_GLEAN_10020247	43.9528	8.61224	2.41081	3.57235	0.000353794	0.0298569	0	0	0	7.76794	2.39785	13.015	S.schlegelii_GLEAN_10020247	gi|348500230|ref|XP_003437676.1|/0/PREDICTED: isocitrate dehydrogenase [NADP], mitochondrial-like [Oreochromis niloticus]	Q4R502/0.0/ IDHP_MACFA Isocitrate dehydrogenase [NADP], mitochondrial OS=Macaca fascicularis GN=IDH2 PE=2 SV=1	lcf:108876947/0.0/idh2; isocitrate dehydrogenase [NADP], mitochondrial; K00031 isocitrate dehydrogenase [EC:1.1.1.42]	biological_process:GO:0006102//isocitrate metabolic process;GO:0055114//oxidation-reduction process;molecular_function:GO:0000287//magnesium ion binding;GO:0004450//isocitrate dehydrogenase (NADP+) activity;GO:0016616//oxidoreductase activity, acting on the CH-OH group of donors, NAD or NADP as acceptor;GO:0051287//NAD binding;
S.schlegelii_GLEAN_10014095	39.6454	-9.03918	2.5326	-3.56912	0.000358176	0.0300279	1.41583	1.40808	10.2232	0	0	0	S.schlegelii_GLEAN_10014095	gi|542178829|ref|XP_005468534.1|/0/PREDICTED: target of Myb protein 1 isoform X2 [Oreochromis niloticus]	O12940/6e-124/ TOM1_CHICK Target of Myb protein 1 OS=Gallus gallus GN=TOM1 PE=2 SV=2	epa:110251865/3e-36/class E vacuolar protein-sorting machinery protein HSE1-like; K16677 dachs	biological_process:GO:0006886//intracellular protein transport;
S.schlegelii_GLEAN_10012595	46.3784	8.6897	2.443	3.55697	0.00037515	0.0312453	0	0	0	2.51435	1.14694	10.4564	S.schlegelii_GLEAN_10012595	gi|734616021|ref|XP_010735631.1|/0/PREDICTED: rho GTPase-activating protein 6 [Larimichthys crocea]	O54834/0.0/ RHG06_MOUSE Rho GTPase-activating protein 6 OS=Mus musculus GN=Arhgap6 PE=1 SV=3	lco:109136604/0.0/rho GTPase-activating protein 6-like; K20631 Rho GTPase-activating protein 6	biological_process:GO:0007015//actin filament organization;GO:0007165//signal transduction;GO:0043087//regulation of GTPase activity;molecular_function:GO:0005096//GTPase activator activity;
S.schlegelii_GLEAN_10000003	337.752	5.32963	1.50118	3.55029	0.000384805	0.0318414	0.453123	1.62916	0	92.9132	15.8378	28.3934	S.schlegelii_GLEAN_10000003	gi|734630730|ref|XP_010743720.1|/0/PREDICTED: uncharacterized protein LOC104930589 [Larimichthys crocea]	Q95SX7/4e-31/ RTBS_DROME Probable RNA-directed DNA polymerase from transposon BS OS=Drosophila melanogaster GN=RTase PE=2 SV=1	ncc:104945035/3e-119/pole; DNA polymerase epsilon catalytic subunit A; K02324 DNA polymerase epsilon subunit 1 [EC:2.7.7.7]	NA
S.schlegelii_GLEAN_10009423	42.4635	8.56252	2.41361	3.54761	0.00038875	0.0319603	0	0	0	8.53348	2.53429	10.7038	S.schlegelii_GLEAN_10009423	gi|657532081|ref|XP_008303631.1|/0/PREDICTED: rab GTPase-binding effector protein 2 [Stegastes partitus]	Q91WG2/2e-45/ RABE2_MOUSE Rab GTPase-binding effector protein 2 OS=Mus musculus GN=Rabep2 PE=1 SV=3	lcf:108881035/0.0/rabep2; rab GTPase-binding effector protein 2; K20130 Rab GTPase-binding effector protein 2	biological_process:GO:0006897//endocytosis;molecular_function:GO:0005096//GTPase activator activity;GO:0008083//growth factor activity;
S.schlegelii_GLEAN_10005115	100.255	9.80172	2.77892	3.52717	0.000420032	0.0343107	0	0	0	40.4505	2.89166	0	S.schlegelii_GLEAN_10005115	gi|657539567|ref|XP_008275941.1|/0/PREDICTED: CCR4-NOT transcription complex subunit 6 [Stegastes partitus]	Q9ULM6/0.0/ CNOT6_HUMAN CCR4-NOT transcription complex subunit 6 OS=Homo sapiens GN=CNOT6 PE=1 SV=2	lcf:108899234/0.0/cnot6; CCR4-NOT transcription complex subunit 6; K12603 CCR4-NOT transcription complex subunit 6 [EC:3.1.13.4]	molecular_function:GO:0005515//protein binding;
S.schlegelii_GLEAN_10004069	69.6956	-9.85453	2.79807	-3.5219	0.000428461	0.034708	0	48.6431	21.5421	0	0	0	S.schlegelii_GLEAN_10004069	gi|734646975|ref|XP_010752652.1|/4.23655e-100/PREDICTED: nuclear receptor coactivator 7-like isoform X2 [Larimichthys crocea]	Q5ZMS4/2e-46/ NCOA7_CHICK Nuclear receptor coactivator 7 OS=Gallus gallus GN=NCOA7 PE=2 SV=1	myi:110463658/7e-13/uncharacterized protein LOC110463658; K21841 TBC1 domain family member 24	NA
S.schlegelii_GLEAN_10003137	38.9779	-9.01475	2.56169	-3.51907	0.000433067	0.034708	8.57711	3.03844	38.6647	0	0	0	S.schlegelii_GLEAN_10003137	gi|642089980|emb|CDQ82348.1|/1.89787e-58/unnamed protein product [Oncorhynchus mykiss]	P35072/3e-28/ TCB1_CAEBR Transposable element Tcb1 transposase OS=Caenorhabditis briggsae PE=3 SV=1	els:105029842/8e-39/zinc finger protein 135-like isoform X1; K09228 KRAB domain-containing zinc finger protein	NA
S.schlegelii_GLEAN_10001184	36.565	-8.92283	2.53479	-3.52015	0.000431304	0.034708	0.966423	0.245484	1.44772	0	0	0	S.schlegelii_GLEAN_10001184	gi|734636892|ref|XP_010747107.1|/0/PREDICTED: collagen alpha-4(IV) chain-like [Larimichthys crocea] &gt;gi|734636894|ref|XP_010747108.1| PREDICTED: collagen alpha-4(IV) chain-like [Larimichthys crocea] &gt;gi|734636896|ref|XP_010747109.1| PREDICTED: collagen alpha-4(IV) chain-like [Larimichthys crocea]	Q14031/0.0/ CO4A6_HUMAN Collagen alpha-6(IV) chain OS=Homo sapiens GN=COL4A6 PE=1 SV=3	lco:104933377/0.0/collagen alpha-4(IV) chain-like; K06237 collagen, type IV, alpha	cellular_component:GO:0005581//collagen trimer;molecular_function:GO:0005201//extracellular matrix structural constituent;
S.schlegelii_GLEAN_10012712	41.2863	8.52123	2.42381	3.51564	0.000438692	0.0349391	0	0	0	9.85014	29.0811	24.0251	S.schlegelii_GLEAN_10012712	gi|736224630|ref|XP_010780858.1|/8.68242e-122/PREDICTED: prostamide/prostaglandin F synthase isoform X1 [Notothenia coriiceps]	B5X9L9/3e-106/ PGFS_SALSA Prostamide/prostaglandin F synthase OS=Salmo salar GN=fam213b PE=2 SV=1	ncc:104955273/2e-122/fam213b; prostamide/prostaglandin F synthase isoform X1; K15717 prostamide/prostaglandin F2alpha synthase [EC:1.11.1.20]	biological_process:GO:0055114//oxidation-reduction process;
S.schlegelii_GLEAN_10004126	34.1935	-8.82634	2.52079	-3.50142	0.000462791	0.0366294	1.49079	1.29194	2.88252	0	0	0	S.schlegelii_GLEAN_10004126	gi|734639789|ref|XP_010748700.1|/0/PREDICTED: sushi domain-containing protein 2-like [Larimichthys crocea]	Q9DBX3/0.0/ SUSD2_MOUSE Sushi domain-containing protein 2 OS=Mus musculus GN=Susd2 PE=1 SV=1	epa:110247754/3e-42/mucin-like protein; K22017 mucin-4	biological_process:GO:0006955//immune response;molecular_function:GO:0005044//scavenger receptor activity;GO:0030247//polysaccharide binding;
S.schlegelii_GLEAN_10005055	63.2435	-7.04077	2.01417	-3.49561	0.000472979	0.0372048	3.57137	1.51441	8.54566	0.173388	0	0	S.schlegelii_GLEAN_10005055	gi|975094301|ref|XP_015261972.1|/0/PREDICTED: zinc finger protein 208-like, partial [Gekko japonicus]	P10076/0.0/ ZFP26_MOUSE Zinc finger protein 26 OS=Mus musculus GN=Zfp26 PE=2 SV=2	gja:107106349/0.0/zinc finger protein 208-like; K09228 KRAB domain-containing zinc finger protein	molecular_function:GO:0046872//metal ion binding;
S.schlegelii_GLEAN_10018464	44.1374	8.61726	2.46657	3.49363	0.000476508	0.0372524	0	0	0	0.278693	2.1598	0.622184	S.schlegelii_GLEAN_10018464	gi|498931262|ref|XP_004539892.1|/0/PREDICTED: neural-cadherin-like [Maylandia zebra]	O15943/0.0/ CADN_DROME Neural-cadherin OS=Drosophila melanogaster GN=CadN PE=1 SV=2	epa:110233247/0.0/protocadherin-like protein; K16506 protocadherin Fat 1/2/3	biological_process:GO:0007155//cell adhesion;GO:0007156//homophilic cell adhesion via plasma membrane adhesion molecules;cellular_component:GO:0005886//plasma membrane;GO:0016020//membrane;molecular_function:GO:0005509//calcium ion binding;GO:0005515//protein binding;
S.schlegelii_GLEAN_10019845	41.518	8.53014	2.44661	3.48651	0.000489363	0.0378354	0	0	0	5.01709	0.827751	3.57703	S.schlegelii_GLEAN_10019845	gi|734616812|ref|XP_010736067.1|/0/PREDICTED: oxysterol-binding protein-related protein 6 [Larimichthys crocea]	Q9BZF3/0.0/ OSBL6_HUMAN Oxysterol-binding protein-related protein 6 OS=Homo sapiens GN=OSBPL6 PE=1 SV=1	lco:104924424/0.0/osbpl6; oxysterol binding protein like 6; K20463 oxysterol-binding protein-related protein 3/6/7	NA
S.schlegelii_GLEAN_10009626	41.8523	8.54078	2.44987	3.48622	0.000489904	0.0378354	0	0	0	2.37427	4.34443	0.8163	S.schlegelii_GLEAN_10009626	gi|734611911|ref|XP_010733383.1|/0/PREDICTED: mediator of DNA damage checkpoint protein 1 [Larimichthys crocea]	Q767L8/7e-61/ MDC1_PIG Mediator of DNA damage checkpoint protein 1 OS=Sus scrofa GN=MDC1 PE=3 SV=1	lco:109139028/0.0/mediator of DNA damage checkpoint protein 1-like; K20780 mediator of DNA damage checkpoint protein 1	molecular_function:GO:0005515//protein binding;
S.schlegelii_GLEAN_10023480	33.7737	-8.80865	2.52914	-3.48286	0.00049609	0.0378543	4.67054	6.84999	12.6591	0	0	0	S.schlegelii_GLEAN_10023480	gi|657583956|ref|XP_008296110.1|/1.70158e-74/PREDICTED: uncharacterized protein C12orf43 homolog isoform X2 [Stegastes partitus]	Q3UY34/5e-21/ CL043_MOUSE Uncharacterized protein C12orf43 homolog OS=Mus musculus PE=2 SV=1	NA	NA
S.schlegelii_GLEAN_10002032	87.4875	9.60536	2.75777	3.48302	0.000495786	0.0378543	0	0	0	324.601	0	57.3869	S.schlegelii_GLEAN_10002032	gi|386307225|gb|AFJ05592.1|/4.50682e-69/immmunoglobulin light chain [Epinephelus coioides]	P06312/5e-31/ KV401_HUMAN Immunoglobulin kappa variable 4-1 OS=Homo sapiens GN=IGKV4-1 PE=1 SV=1	tup:106736217/3e-20/immunoglobulin omega chain-like; K06553 pre-B lymphocyte gene	molecular_function:GO:0005515//protein binding;
S.schlegelii_GLEAN_10002961	37.0858	-8.94301	2.57465	-3.47348	0.000513752	0.0384745	0.439285	1.22548	5.26204	0	0	0	S.schlegelii_GLEAN_10002961	gi|808865942|gb|KKF16715.1|/0/Diacylglycerol kinase alpha [Larimichthys crocea]	Q6NS52/0.0/ DGKB_MOUSE Diacylglycerol kinase beta OS=Mus musculus GN=Dgkb PE=1 SV=2	lcf:108884447/0.0/diacylglycerol kinase alpha-like; K00901 diacylglycerol kinase (ATP) [EC:2.7.1.107]	biological_process:GO:0007205//protein kinase C-activating G-protein coupled receptor signaling pathway;GO:0035556//intracellular signal transduction;molecular_function:GO:0004143//diacylglycerol kinase activity;GO:0005509//calcium ion binding;GO:0016301//kinase activity;
S.schlegelii_GLEAN_10004883	38.5473	8.42253	2.42573	3.47216	0.000516294	0.0384745	0	0	0	7.92855	7.57549	7.66135	S.schlegelii_GLEAN_10004883	gi|734630031|ref|XP_010743336.1|/0/PREDICTED: beta-1,4-galactosyltransferase 3-like [Larimichthys crocea] &gt;gi|734630033|ref|XP_010743337.1| PREDICTED: beta-1,4-galactosyltransferase 3-like [Larimichthys crocea] &gt;gi|734630035|ref|XP_010743338.1| PREDICTED: beta-1,4-galactosyltransferase 3-like [Larimichthys crocea]	Q80WN8/2e-133/ B4GT3_CRIGR Beta-1,4-galactosyltransferase 3 OS=Cricetulus griseus GN=B4GALT3 PE=2 SV=1	lco:104930288/0.0/beta-1,4-galactosyltransferase 3-like; K07968 beta-1,4-galactosyltransferase 3 [EC:2.4.1.90 2.4.1.38 2.4.1.-]	biological_process:GO:0005975//carbohydrate metabolic process;molecular_function:GO:0016757//transferase activity, transferring glycosyl groups;
S.schlegelii_GLEAN_10006062	39.0955	8.44269	2.43021	3.47406	0.000512655	0.0384745	0	0	0	2.85945	3.81707	2.08819	S.schlegelii_GLEAN_10006062	gi|734610148|ref|XP_010732417.1|/0/PREDICTED: SEC14-like protein 1 [Larimichthys crocea]	Q92503/0.0/ S14L1_HUMAN SEC14-like protein 1 OS=Homo sapiens GN=SEC14L1 PE=1 SV=2	fch:102055515/5e-23/SEC14L2; SEC14 like lipid binding 2; K17981 mitochondrial fission process protein 1	biological_process:GO:0006810//transport;cellular_component:GO:0016021//integral component of membrane;
S.schlegelii_GLEAN_10009490	40.3281	8.48733	2.44419	3.47246	0.00051572	0.0384745	0	0	0	1.12857	3.76252	2.7152	S.schlegelii_GLEAN_10009490	gi|657574426|ref|XP_008290919.1|/0/PREDICTED: ADAMTS-like protein 4 [Stegastes partitus]	Q6ZMP0/0.0/ THSD4_HUMAN Thrombospondin type-1 domain-containing protein 4 OS=Homo sapiens GN=THSD4 PE=2 SV=2	oaa:100076885/2e-64/ADAMTS9; ADAM metallopeptidase with thrombospondin type 1 motif 9; K08624 a disintegrin and metalloproteinase with thrombospondin motifs 9 [EC:3.4.24.-]	cellular_component:GO:0031012//extracellular matrix;molecular_function:GO:0004222//metalloendopeptidase activity;GO:0008233//peptidase activity;
S.schlegelii_GLEAN_10003154	686.311	-3.28171	0.951742	-3.44811	0.000564514	0.0418233	77.9098	87.1781	171.693	16.255	19.4267	17.842	S.schlegelii_GLEAN_10003154	gi|734636363|ref|XP_010746818.1|/0/PREDICTED: deoxynucleotidyltransferase terminal-interacting protein 1 [Larimichthys crocea]	Q9H147/6e-126/ TDIF1_HUMAN Deoxynucleotidyltransferase terminal-interacting protein 1 OS=Homo sapiens GN=DNTTIP1 PE=1 SV=2	lco:104933137/0.0/dnttip1; deoxynucleotidyltransferase terminal interacting protein 1; K08707 deoxynucleotidyltransferase terminal-interacting protein 1	NA
S.schlegelii_GLEAN_10019467	38.6151	8.42501	2.44611	3.44424	0.00057266	0.0421815	0	0	0	1.71297	2.76543	3.88396	S.schlegelii_GLEAN_10019467	gi|808870286|gb|KKF20186.1|/0/Cytosolic carboxypeptidase-like protein 5 [Larimichthys crocea]	Q68EI3/0.0/ CBPC5_DANRE Cytosolic carboxypeptidase-like protein 5 OS=Danio rerio GN=agbl5 PE=2 SV=1	myb:102243447/4e-12/DRD5; dopamine receptor D5; K05840 dopamine receptor D5	biological_process:GO:0006508//proteolysis;molecular_function:GO:0004181//metallocarboxypeptidase activity;GO:0008270//zinc ion binding;
S.schlegelii_GLEAN_10005610	37.7409	8.392	2.4448	3.4326	0.000597828	0.0437823	0	0	0	5.54205	6.60495	8.20227	S.schlegelii_GLEAN_10005610	gi|657559796|ref|XP_008283745.1|/0/PREDICTED: neuroserpin [Stegastes partitus]	Q90935/0.0/ NEUS_CHICK Neuroserpin OS=Gallus gallus GN=SERPINI1 PE=1 SV=1	cjc:100413248/1e-73/SERPINB11, SERPINB8P1; serpin family B member 11; K13966 serpin B11/12	cellular_component:GO:0005615//extracellular space;
S.schlegelii_GLEAN_10009702	141.025	6.36629	1.85704	3.42819	0.000607619	0.0442451	0.0973242	0	0	6.3525	0.955977	7.50768	S.schlegelii_GLEAN_10009702	gi|542235156|ref|XP_005455640.1|/0/PREDICTED: dedicator of cytokinesis protein 4 isoform X2 [Oreochromis niloticus]	P59764/0.0/ DOCK4_MOUSE Dedicator of cytokinesis protein 4 OS=Mus musculus GN=Dock4 PE=1 SV=1	lcf:108887392/0.0/dock4; LOW QUALITY PROTEIN: dedicator of cytokinesis protein 4; K17697 dedicator of cytokinesis protein 4	biological_process:GO:0007264//small GTPase mediated signal transduction;molecular_function:GO:0005085//guanyl-nucleotide exchange factor activity;GO:0005515//protein binding;
S.schlegelii_GLEAN_10019132	32.938	-8.77222	2.5705	-3.41265	0.00064334	0.04658	2.30069	3.71192	9.56706	0	0	0	S.schlegelii_GLEAN_10019132	gi|768940439|ref|XP_003971544.2|/0/PREDICTED: 12-(S)-hydroxy-5,8,10,14-eicosatetraenoic acid receptor-like [Takifugu rubripes]	Q80Z39/1e-40/ HCAR2_RAT Hydroxycarboxylic acid receptor 2 OS=Rattus norvegicus GN=Hcar2 PE=1 SV=1	csem:103381260/1e-177/gpr31; 12-(S)-hydroxy-5,8,10,14-eicosatetraenoic acid receptor; K08406 G protein-coupled receptor 31	biological_process:GO:0007186//G-protein coupled receptor signaling pathway;cellular_component:GO:0016021//integral component of membrane;molecular_function:GO:0004930//G-protein coupled receptor activity;
S.schlegelii_GLEAN_10014785	37.7228	8.39177	2.47153	3.39538	0.00068534	0.0493406	0	0	0	12.8701	3.53526	8.70943	S.schlegelii_GLEAN_10014785	gi|808880620|gb|KKF28443.1|/0/Ankyrin repeat domain-containing protein 10 [Larimichthys crocea]	Q5ZLC6/4e-100/ ANR10_CHICK Ankyrin repeat domain-containing protein 10 OS=Gallus gallus GN=ANKRD10 PE=2 SV=1	ncc:104954356/2e-26/ddx4; probable ATP-dependent RNA helicase DDX4; K13982 probable ATP-dependent RNA helicase DDX4 [EC:3.6.4.13]	molecular_function:GO:0005515//protein binding;
S.schlegelii_GLEAN_10005937	37.5127	8.38343	2.47114	3.39254	0.000692478	0.0495744	0	0	0	3.84298	2.03062	1.20112	S.schlegelii_GLEAN_10005937	gi|734613360|ref|XP_010734185.1|/0/PREDICTED: MKL/myocardin-like protein 1 [Larimichthys crocea]	Q8AYC1/1e-123/ MRTFB_XENLA Myocardin-related transcription factor B OS=Xenopus laevis GN=mrtfb PE=2 SV=1	NA	NA
S.schlegelii_GLEAN_10010701	36.6931	8.35126	2.46419	3.38905	0.000701355	0.0499294	0	0	0	5.52874	6.77565	4.4253	S.schlegelii_GLEAN_10010701	gi|808867518|gb|KKF18052.1|/0/Solute carrier family 2, facilitated glucose transporter member 8 [Larimichthys crocea]	Q9JJZ1/3e-180/ GTR8_RAT Solute carrier family 2, facilitated glucose transporter member 8 OS=Rattus norvegicus GN=Slc2a8 PE=1 SV=1	lcf:108881653/0.0/solute carrier family 2, facilitated glucose transporter member 8-like; K08145 MFS transporter, SP family, solute carrier family 2 (facilitated glucose transporter), member 8	biological_process:GO:0055085//transmembrane transport;cellular_component:GO:0016020//membrane;GO:0016021//integral component of membrane;molecular_function:GO:0005215//transporter activity;GO:0022857//transmembrane transporter activity;GO:0022891//substrate-specific transmembrane transporter activity;

## Sheet: GO enrichment analysis
GO_ID	GO_Term	GO_Class	Pvalue	Qvalue	GeneNumber	GeneID
GO:0016265	death	BP	0.00321308	0.295604	5	S.schlegelii_GLEAN_10004298,S.schlegelii_GLEAN_10004374,S.schlegelii_GLEAN_10016544,S.schlegelii_GLEAN_10019253,S.schlegelii_GLEAN_10022206
GO:0044421	extracellular region part	CC	0.0281236	0.71447	4	S.schlegelii_GLEAN_10001522,S.schlegelii_GLEAN_10004298,S.schlegelii_GLEAN_10005610,S.schlegelii_GLEAN_10009138
GO:0042765	GPI-anchor transamidase complex	CC	0.0290799	0.71447	1	S.schlegelii_GLEAN_10022044
GO:0005615	extracellular space	CC	0.0374662	0.71447	3	S.schlegelii_GLEAN_10004298,S.schlegelii_GLEAN_10005610,S.schlegelii_GLEAN_10009138
GO:0004871	signal transducer activity	MF	0.0437219	0.71447	3	S.schlegelii_GLEAN_10002320,S.schlegelii_GLEAN_10016614,S.schlegelii_GLEAN_10019132

## Sheet: KEGG enrichment analysis
MapID	MapTitle	MapClass	Genes	Pvalue	Qvalue	GeneNumber	GeneID
map04146	Peroxisome	Cellular Processes; Transport and catabolism	paox,idhp,iv301,acsl4	0.0198661	0.581867	4	S.schlegelii_GLEAN_10003998 S.schlegelii_GLEAN_10020247 S.schlegelii_GLEAN_10021350 S.schlegelii_GLEAN_10022666
map04136	Autophagy - other	Cellular Processes; Transport and catabolism	bcas3,atg10	0.0443091	0.584855	2	S.schlegelii_GLEAN_10001789 S.schlegelii_GLEAN_10016400
map04012	ErbB signaling pathway	Environmental Information Processing; Signal transduction	myc1,pk3ca,pygo2,sos2,nrg1,pak2	0.00194076	0.483249	6	S.schlegelii_GLEAN_10004205 S.schlegelii_GLEAN_10011704 S.schlegelii_GLEAN_10014240 S.schlegelii_GLEAN_10017212 S.schlegelii_GLEAN_10018266 S.schlegelii_GLEAN_10023237
map04072	Phospholipase D signaling pathway	Environmental Information Processing; Signal transduction	hv348, dgkb,pi51b,pk3ca,pygo2,anr10,sos2,plcb4	0.00783372	0.487649	9	S.schlegelii_GLEAN_10001563 S.schlegelii_GLEAN_10001888 S.schlegelii_GLEAN_10002961 S.schlegelii_GLEAN_10008330 S.schlegelii_GLEAN_10011704 S.schlegelii_GLEAN_10014240 S.schlegelii_GLEAN_10014785 S.schlegelii_GLEAN_10017212 S.schlegelii_GLEAN_10019435
map04391	Hippo signaling pathway - fly	Environmental Information Processing; Signal transduction	rasf2,myc1,tom1,2aba	0.0448584	0.584855	4	S.schlegelii_GLEAN_10003698 S.schlegelii_GLEAN_10004205 S.schlegelii_GLEAN_10014095 S.schlegelii_GLEAN_10023315
map05231	Choline metabolism in cancer	Human Diseases; Cancer: overview	gdkb,pi51b,pk3ca,sos2,s22a5	0.0380843	0.584855	5	S.schlegelii_GLEAN_10002961 S.schlegelii_GLEAN_10008330 S.schlegelii_GLEAN_10011704 S.schlegelii_GLEAN_10017212 S.schlegelii_GLEAN_10020106
map05220	Chronic myeloid leukemia	Human Diseases; Cancer: specific types	myc1,tgfb2,pk3ca,pygo2,sos2	0.00776462	0.487649	5	S.schlegelii_GLEAN_10004205 S.schlegelii_GLEAN_10009138 S.schlegelii_GLEAN_10011704 S.schlegelii_GLEAN_10014240 S.schlegelii_GLEAN_10017212
map05211	Renal cell carcinoma	Human Diseases; Cancer: specific types	tgfb2,pk3ca,sos2,pak2	0.0214521	0.581867	4	S.schlegelii_GLEAN_10009138 S.schlegelii_GLEAN_10011704 S.schlegelii_GLEAN_10017212 S.schlegelii_GLEAN_10023237
map05226	Gastric cancer	Human Diseases; Cancer: specific types	myc1,tgfb2,pk3ca,pygo2,sos2,ladd	0.0220342	0.581867	6	S.schlegelii_GLEAN_10004205 S.schlegelii_GLEAN_10009138 S.schlegelii_GLEAN_10011704 S.schlegelii_GLEAN_10014240 S.schlegelii_GLEAN_10017212 S.schlegelii_GLEAN_10018355
map01521	EGFR tyrosine kinase inhibitor resistance	Human Diseases; Drug resistance: antineoplastic	pk3ca,pygo2,sos2,nrg1	0.0332836	0.584855	4	S.schlegelii_GLEAN_10011704 S.schlegelii_GLEAN_10014240 S.schlegelii_GLEAN_10017212 S.schlegelii_GLEAN_10018266
map04933	AGE-RAGE signaling pathway in diabetic complications	Human Diseases; Endocrine and metabolic disease	co4a6,tgfb2,pk3ca,lyam2,plcb4	0.0306556	0.584855	5	S.schlegelii_GLEAN_10001184 S.schlegelii_GLEAN_10009138 S.schlegelii_GLEAN_10011704 S.schlegelii_GLEAN_10016907 S.schlegelii_GLEAN_10019435
map05146	Amoebiasis	Human Diseases; Infectious disease: parasitic	co4a6,hv348, neus,tgfb2,pk3ca,plcb4	0.0139099	0.577261	7	S.schlegelii_GLEAN_10001184 S.schlegelii_GLEAN_10001563 S.schlegelii_GLEAN_10001888 S.schlegelii_GLEAN_10005610 S.schlegelii_GLEAN_10009138 S.schlegelii_GLEAN_10011704 S.schlegelii_GLEAN_10019435
map05169	Epstein-Barr virus infection	Human Diseases; Infectious disease: viral	hv348,ubp5,myc1,pk3ca,dhe3,ladd,mp2k6,vime	0.00527243	0.487649	10	S.schlegelii_GLEAN_10001563 S.schlegelii_GLEAN_10001888 S.schlegelii_GLEAN_10002217 S.schlegelii_GLEAN_10002436 S.schlegelii_GLEAN_10004205 S.schlegelii_GLEAN_10011704 S.schlegelii_GLEAN_10013258 S.schlegelii_GLEAN_10018355 S.schlegelii_GLEAN_10021340 S.schlegelii_GLEAN_10022179
map00563	Glycosylphosphatidylinositol (GPI)-anchor biosynthesis	Metabolism; Glycan biosynthesis and metabolism	pigy,gpi8	0.0233681	0.581867	2	S.schlegelii_GLEAN_10015276 S.schlegelii_GLEAN_10022044
map04320	Dorso-ventral axis formation	Organismal Systems; Development and regeneration	fhod3,sos2,tex2	0.0396981	0.584855	3	S.schlegelii_GLEAN_10007560 S.schlegelii_GLEAN_10017212 S.schlegelii_GLEAN_10018315
map04662	B cell receptor signaling pathway	Organismal Systems; Immune system	cd22,hv348,cd79b,pk3ca,sos2,bcl10	0.0121951	0.577261	7	S.schlegelii_GLEAN_10000267 S.schlegelii_GLEAN_10001563 S.schlegelii_GLEAN_10001888 S.schlegelii_GLEAN_10010638 S.schlegelii_GLEAN_10011704 S.schlegelii_GLEAN_10017212 S.schlegelii_GLEAN_10022206
map04664	Fc epsilon RI signaling pathway	Organismal Systems; Immune system	hv348,pk3ca,sos2,mp2k6	0.0418552	0.584855	5	S.schlegelii_GLEAN_10001563 S.schlegelii_GLEAN_10001888 S.schlegelii_GLEAN_10011704 S.schlegelii_GLEAN_10017212 S.schlegelii_GLEAN_10021340
