# Supplementary material for: Effects of Cryopreservation on Sperm with Cryodiluent in Viviparous Black Rockfish (Sebastes schlegelii)
Source: Int J Mol Sci. 2022 Mar 21;23(6):3392. doi: 10.3390/ijms23063392 (PMC8955014; doi:10.3390/ijms23063392)
Supplement: Supplementary file 1 [file ijms-23-03392-s001.zip › Data S2. The supplementary data of methylome analysis. .xlsx]

## Sheet: DMGs
Gene_id	LogFC	logCPM	Pvalue	Qvalue	Nr	Swissprot	KEGG	GO
S.schlegelii_GLEAN_10015251	-8.90319	7.43314	2.08178e-41	8.26494e-38	gi|657577675|ref|XP_008292678.1|/4.21654e-42/PREDICTED: integumentary mucin A.1-like [Stegastes partitus]	Q4V7A5/5e-17/ CK024_RAT Uncharacterized protein C11orf24 homolog OS=Rattus norvegicus PE=2 SV=1	NA	NA
S.schlegelii_GLEAN_10001070	-8.826	7.35249	1.34516e-16	2.29499e-14	gi|688533948|ref|XP_009292265.1|/0/PREDICTED: uncharacterized protein LOC101884727 [Danio rerio]	NA	sko:102807548/5e-67/uncharacterized LOC102807548; K17388 Rho-associated protein kinase 2 [EC:2.7.11.1]	biological_process:GO:0015074//DNA integration;
S.schlegelii_GLEAN_10018061	-8.37853	6.95823	2.42607e-16	3.9213e-14	gi|831478004|ref|XP_012715484.1|/2.55676e-40/PREDICTED: guanine nucleotide-binding protein G(T) subunit gamma-T1-like [Fundulus heteroclitus] &gt;gi|831478007|ref|XP_012715488.1| PREDICTED: guanine nucleotide-binding protein G(T) subunit gamma-T1-like [Fundulus heteroclitus]	P63211/2e-27/ GBG1_HUMAN Guanine nucleotide-binding protein G(T) subunit gamma-T1 OS=Homo sapiens GN=GNGT1 PE=1 SV=2	tru:101070134/8e-40/guanine nucleotide-binding protein G(T) subunit gamma-T1-like; K04548 guanine nucleotide-binding protein G(T) subunit gamma-T1	biological_process:GO:0007186//G-protein coupled receptor signaling pathway;cellular_component:GO:0005834//heterotrimeric G-protein complex;molecular_function:GO:0004871//signal transducer activity;
S.schlegelii_GLEAN_10021721	-8.36974	6.93921	1.28506e-29	1.28151e-26	gi|808871835|gb|KKF21413.1|/1.37631e-66/Muscle, skeletal receptor tyrosine protein kinase [Larimichthys crocea]	Q8AXY6/6e-55/ MUSK_CHICK Muscle, skeletal receptor tyrosine protein kinase OS=Gallus gallus GN=MUSK PE=2 SV=1	lco:104927713/1e-67/musk; muscle associated receptor tyrosine kinase; K05129 muscle, skeletal, receptor tyrosine kinase [EC:2.7.10.1]	biological_process:GO:0006468//protein phosphorylation;molecular_function:GO:0004672//protein kinase activity;GO:0004713//protein tyrosine kinase activity;GO:0005524//ATP binding;
S.schlegelii_GLEAN_10006346	-8.34742	6.91424	6.02604e-19	1.54216e-16	gi|657798231|ref|XP_008326196.1|/4.89298e-115/PREDICTED: gamma-crystallin M3-like isoform X1 [Cynoglossus semilaevis]	P10044/5e-98/ CRGM2_CYPCA Gamma-crystallin M2 OS=Cyprinus carpio PE=2 SV=1	bacu:103015945/4e-50/TBCCD1; TBCC domain containing 1; K16810 TBCC domain-containing protein 1	NA
S.schlegelii_GLEAN_10021627	-8.32775	6.89787	1.03361e-19	3.05212e-17	gi|47220044|emb|CAG12192.1|/8.09107e-65/unnamed protein product [Tetraodon nigroviridis]	P27815/4e-33/ PDE4A_HUMAN cAMP-specific 3',5'-cyclic phosphodiesterase 4A OS=Homo sapiens GN=PDE4A PE=1 SV=3	tru:101061179/9e-63/pde4a; phosphodiesterase 4A; K13293 cAMP-specific phosphodiesterase 4 [EC:3.1.4.53]	NA
S.schlegelii_GLEAN_10003699	-8.25931	6.83799	2.3258e-29	2.10075e-26	gi|928019946|ref|XP_013858031.1|/9.1256e-27/PREDICTED: glycine-rich cell wall structural protein [Austrofundulus limnaeus]	NA	NA	NA
S.schlegelii_GLEAN_10000087	-8.23874	6.82068	1.62035e-24	8.29352e-22	gi|658903074|ref|XP_008434286.1|/8.61367e-32/PREDICTED: uncharacterized protein LOC103480862 [Poecilia reticulata]	NA	pret:103480862/2e-32/programmed cell death 1 ligand 1-like; K06745 programmed cell death 1 ligand 1	NA
S.schlegelii_GLEAN_10020428	-8.01517	6.61982	1.92669e-21	7.04388e-19	gi|908557870|ref|XP_013123292.1|/5.11231e-100/PREDICTED: uncharacterized protein LOC106097511 [Oreochromis niloticus]	NA	mze:101467026/6e-29/X-linked interleukin-1 receptor accessory protein-like 2; K05170 interleukin 1 receptor accessory protein-like	NA
S.schlegelii_GLEAN_10010489	-7.97171	6.56975	1.73544e-16	2.89649e-14	gi|498986805|ref|XP_004551372.1|/3.31133e-96/PREDICTED: centrosomal protein of 97 kDa [Maylandia zebra]	Q8IW35/1e-22/ CEP97_HUMAN Centrosomal protein of 97 kDa OS=Homo sapiens GN=CEP97 PE=1 SV=1	lcf:108901032/5e-102/cep97; LOW QUALITY PROTEIN: centrosomal protein of 97 kDa; K16717 centrosomal protein CEP97	NA
S.schlegelii_GLEAN_10007488	-7.96495	6.57438	1.43945e-21	5.3909e-19	gi|962011873|ref|XP_014831474.1|/1.57602e-67/PREDICTED: uncharacterized protein LOC106909583 isoform X4 [Poecilia mexicana]	NA	pret:103460534/8e-60/uncharacterized protein LOC103460534 isoform X1; K06745 programmed cell death 1 ligand 1	NA
S.schlegelii_GLEAN_10006811	-7.9549	6.56176	2.29397e-16	3.74723e-14	gi|808882488|gb|KKF29872.1|/2.81368e-53/Homeodomain-interacting protein kinase 1 [Larimichthys crocea]	Q8MQ70/7e-27/ HIPK_CAEEL Homeodomain-interacting protein kinase 1 OS=Caenorhabditis elegans GN=hpk-1 PE=2 SV=1	lcf:108880350/8e-56/homeodomain-interacting protein kinase 1-like; K08826 homeodomain interacting protein kinase [EC:2.7.11.1]	biological_process:GO:0006468//protein phosphorylation;molecular_function:GO:0004672//protein kinase activity;GO:0005524//ATP binding;
S.schlegelii_GLEAN_10008633	-7.93927	6.54843	3.44295e-20	1.10139e-17	gi|229366782|gb|ACQ58371.1|/5.36629e-58/DLA class II histocompatibility antigen, DR-1 beta chain precursor [Anoplopoma fimbria]	P06341/6e-28/ HB2A_RAT Rano class II histocompatibility antigen, A beta chain (Fragment) OS=Rattus norvegicus GN=RT1-B PE=3 SV=1	lcf:108889609/1e-56/H-2 class II histocompatibility antigen, E-S beta chain-like isoform X1; K06752 major histocompatibility complex, class II	molecular_function:GO:0005515//protein binding;
S.schlegelii_GLEAN_10023737	-7.83715	6.46896	2.25114e-13	2.24456e-11	gi|795323057|ref|XP_011818337.1|/8.6927e-90/PREDICTED: calmodulin isoform X2 [Colobus angolensis palliatus]	Q7T3T2/7e-91/ CALM_EPIAK Calmodulin OS=Epinephelus akaara GN=calm PE=2 SV=3	lco:104931207/2e-90/calmodulin-alpha-like; K02183 calmodulin	molecular_function:GO:0005509//calcium ion binding;
S.schlegelii_GLEAN_10002688	-7.80416	6.44571	4.59414e-13	4.43667e-11	gi|736230284|ref|XP_010782312.1|/8.31766e-87/PREDICTED: transmembrane protein 60-like [Notothenia coriiceps]	Q8K174/4e-54/ TMM60_MOUSE Transmembrane protein 60 OS=Mus musculus GN=Tmem60 PE=2 SV=1	phu:Phum_PHUM177410/3e-12/hypothetical protein; K18207 protein O-mannose beta-1,4-N-acetylglucosaminyltransferase [EC:2.4.1.312]	NA
S.schlegelii_GLEAN_10023145	-7.73976	6.37316	7.64594e-17	1.38122e-14	gi|831528095|ref|XP_012719997.1|/5.30156e-113/PREDICTED: uncharacterized protein LOC105927660 [Fundulus heteroclitus]	Q80ZI1/3e-15/ TRNP1_MOUSE TMF-regulated nuclear protein 1 OS=Mus musculus GN=Trnp1 PE=1 SV=1	NA	molecular_function:GO:0005515//protein binding;
S.schlegelii_GLEAN_10021593	-7.70356	6.34514	2.46879e-18	5.57474e-16	gi|657801189|ref|XP_008327715.1|/4.96399e-54/PREDICTED: BAI1-associated protein 3-like [Cynoglossus semilaevis]	O94812/4e-19/ BAIP3_HUMAN BAI1-associated protein 3 OS=Homo sapiens GN=BAIAP3 PE=1 SV=2	ncc:104963753/4e-54/BAI1-associated protein 3-like; K15621 BAI1-associated protein 3	NA
S.schlegelii_GLEAN_10001035	-7.68639	6.35159	4.19087e-10	2.28194e-08	gi|164422177|gb|ABY55167.1|/0/interferon-inducible protein 56 [Larimichthys crocea]	Q5T764/7e-23/ IFT1B_HUMAN Interferon-induced protein with tetratricopeptide repeats 1B OS=Homo sapiens GN=IFIT1B PE=1 SV=1	hcq:109515105/9e-153/interferon-induced protein with tetratricopeptide repeats 1-like; K14217 interferon-induced protein with tetratricopeptide repeats 1	NA
S.schlegelii_GLEAN_10012239	-7.59514	6.2488	6.14796e-18	1.25869e-15	gi|835917640|ref|XP_012774376.1|/6.14405e-36/PREDICTED: splicing factor, arginine/serine-rich 15 [Maylandia zebra]	NA	mze:101483184/1e-36/scaf4; SR-related CTD associated factor 4; K13167 splicing factor, arginine/serine-rich 15	NA
S.schlegelii_GLEAN_10021681	-7.57704	6.2508	2.45174e-11	1.69579e-09	gi|808884749|gb|KKF31652.1|/8.40753e-100/Potassium voltage-gated channel subfamily A member 3 [Larimichthys crocea]	Q9I830/2e-81/ KCNA2_ONCMY Potassium voltage-gated channel subfamily A member 2 OS=Oncorhynchus mykiss GN=kcna2 PE=2 SV=1	lco:109137472/2e-100/potassium voltage-gated channel subfamily A member 7-like; K04880 potassium voltage-gated channel Shaker-related subfamily A member 7	biological_process:GO:0006813//potassium ion transport;GO:0051260//protein homooligomerization;cellular_component:GO:0008076//voltage-gated potassium channel complex;molecular_function:GO:0005249//voltage-gated potassium channel activity;
S.schlegelii_GLEAN_10022796	-7.5666	6.22241	1.56187e-15	2.18023e-13	gi|808873980|gb|KKF23183.1|/3.0709e-134/Oligodendrocyte transcription factor 3 [Larimichthys crocea]	Q6PFG8/7e-52/ OLIG3_MOUSE Oligodendrocyte transcription factor 3 OS=Mus musculus GN=Olig3 PE=2 SV=1	lco:104932724/6e-135/oligodendrocyte transcription factor 3; K09085 class B basic helix-loop-helix protein 1/6/7	molecular_function:GO:0046983//protein dimerization activity;
S.schlegelii_GLEAN_10000027	-7.55097	6.22963	3.27971e-11	2.2185e-09	gi|808860178|gb|KKF12219.1|/0/Protein NLRC3 [Larimichthys crocea]	Q7RTR2/6e-67/ NLRC3_HUMAN NLR family CARD domain-containing protein 3 OS=Homo sapiens GN=NLRC3 PE=1 SV=2	lcf:108892181/0.0/NACHT, LRR and PYD domains-containing protein 12-like; K20865 NACHT, LRR and PYD domains-containing protein 12	NA
S.schlegelii_GLEAN_10003067	-7.53524	6.19803	2.03854e-18	4.6719e-16	gi|908544349|ref|XP_013120337.1|/1.042e-94/PREDICTED: uncharacterized protein LOC106096637 [Oreochromis niloticus]	Q5T7N2/3e-14/ LITD1_HUMAN LINE-1 type transposase domain-containing protein 1 OS=Homo sapiens GN=L1TD1 PE=1 SV=1	mze:106675682/3e-46/olfactory receptor 6N1-like; K04257 olfactory receptor	NA
S.schlegelii_GLEAN_10018751	-7.52369	6.19987	6.18326e-13	5.75418e-11	gi|658923665|ref|XP_008401549.1|/2.41897e-119/PREDICTED: metabotropic glutamate receptor 8-like [Poecilia reticulata] &gt;gi|658923667|ref|XP_008401550.1| PREDICTED: metabotropic glutamate receptor 8-like [Poecilia reticulata]	O00222/1e-79/ GRM8_HUMAN Metabotropic glutamate receptor 8 OS=Homo sapiens GN=GRM8 PE=2 SV=2	lco:104934193/2e-117/grm8; metabotropic glutamate receptor 8; K04608 metabotropic glutamate receptor 6/7/8	biological_process:GO:0007186//G-protein coupled receptor signaling pathway;cellular_component:GO:0016021//integral component of membrane;molecular_function:GO:0004930//G-protein coupled receptor activity;
S.schlegelii_GLEAN_10010878	-7.50098	6.16804	4.40804e-16	6.97788e-14	gi|657585106|ref|XP_008296735.1|/1.49544e-134/PREDICTED: ADP-ribosylation factor-like protein 14 [Stegastes partitus]	Q8N4G2/2e-60/ ARL14_HUMAN ADP-ribosylation factor-like protein 14 OS=Homo sapiens GN=ARL14 PE=1 SV=2	ncc:104954273/1e-134/arl14; ADP-ribosylation factor-like protein 14; K17200 ADP-ribosylation factor-like protein 14	biological_process:GO:0007264//small GTPase mediated signal transduction;cellular_component:GO:0005622//intracellular;molecular_function:GO:0005525//GTP binding;
S.schlegelii_GLEAN_10015653	-7.4889	6.14597	1.6466e-11	1.18147e-09	gi|692348905|gb|AIS22060.1|/1.91982e-161/myogenic factor MYOG [Monopterus albus]	P17920/1e-72/ MYOG_CHICK Myogenin OS=Gallus gallus GN=MYOG PE=2 SV=1	lcf:108889408/1e-159/myog; myogenin; K18483 myogenic factor 4 (myogenin)	biological_process:GO:0006355//regulation of transcription, DNA-templated;GO:0007517//muscle organ development;cellular_component:GO:0005634//nucleus;molecular_function:GO:0003677//DNA binding;GO:0046983//protein dimerization activity;
S.schlegelii_GLEAN_10018216	-7.47595	6.15203	4.42178e-11	2.91401e-09	gi|657581653|ref|XP_008294854.1|/0/PREDICTED: proteinase-activated receptor 3-like [Stegastes partitus]	Q80Z39/1e-10/ HCAR2_RAT Hydroxycarboxylic acid receptor 2 OS=Rattus norvegicus GN=Hcar2 PE=1 SV=1	ola:110016007/2e-154/uracil nucleotide/cysteinyl leukotriene receptor-like; K08404 G protein-coupled receptor 17	biological_process:GO:0007186//G-protein coupled receptor signaling pathway;cellular_component:GO:0016021//integral component of membrane;molecular_function:GO:0004930//G-protein coupled receptor activity;
S.schlegelii_GLEAN_10021815	-7.46451	6.15369	4.56753e-11	2.9972e-09	gi|542231998|ref|XP_003449413.2|/6.06181e-121/PREDICTED: uncharacterized protein LOC100695668 [Oreochromis niloticus]	NA	aplc:110973579/5e-18/uncharacterized protein LOC110973579; K21754 BTB/POZ domain-containing protein KCTD1/15	NA
S.schlegelii_GLEAN_10014218	-7.42396	6.11273	1.01309e-11	7.61724e-10	gi|657573732|ref|XP_008290544.1|/0/PREDICTED: olfactory receptor 6N2-like [Stegastes partitus]	Q9H344/5e-35/ O51I2_HUMAN Olfactory receptor 51I2 OS=Homo sapiens GN=OR51I2 PE=3 SV=1	lco:104936016/0.0/olfactory receptor 142-like; K04257 olfactory receptor	biological_process:GO:0007186//G-protein coupled receptor signaling pathway;cellular_component:GO:0016021//integral component of membrane;molecular_function:GO:0004930//G-protein coupled receptor activity;GO:0004984//olfactory receptor activity;
S.schlegelii_GLEAN_10009993	-7.32444	6.02271	1.87886e-14	2.35688e-12	gi|961801848|ref|XP_014860143.1|/1.11126e-155/PREDICTED: DNA damage-inducible transcript 3 protein [Poecilia mexicana]	P35638/1e-13/ DDIT3_HUMAN DNA damage-inducible transcript 3 protein OS=Homo sapiens GN=DDIT3 PE=1 SV=1	amex:103022996/2e-90/ddit3; DNA damage-inducible transcript 3 protein; K04452 DNA damage-inducible transcript 3	NA
S.schlegelii_GLEAN_10015180	-7.28039	5.98258	7.76529e-16	1.14238e-13	gi|657570261|ref|XP_008288654.1|/0/PREDICTED: zinc finger protein Pegasus [Stegastes partitus]	Q8BU00/1e-176/ IKZF5_MOUSE Zinc finger protein Pegasus OS=Mus musculus GN=Ikzf5 PE=2 SV=1	lcf:108899016/0.0/ikzf5; LOW QUALITY PROTEIN: zinc finger protein Pegasus; K09220 IKAROS family zinc finger protein	molecular_function:GO:0046872//metal ion binding;
S.schlegelii_GLEAN_10019349	-7.22341	5.93527	1.04746e-14	1.36302e-12	gi|554807472|ref|XP_005914657.1|/2.81416e-124/PREDICTED: leukotriene B4 receptor 1-like [Haplochromis burtoni]	P51683/5e-31/ CCR2_MOUSE C-C chemokine receptor type 2 OS=Mus musculus GN=Ccr2 PE=1 SV=2	pret:103457716/2e-114/leukotriene B4 receptor 1-like; K04296 leukotriene B4 receptor 1	biological_process:GO:0007186//G-protein coupled receptor signaling pathway;cellular_component:GO:0016021//integral component of membrane;molecular_function:GO:0004930//G-protein coupled receptor activity;
S.schlegelii_GLEAN_10023230	-7.19598	5.91435	4.95759e-14	5.68088e-12	gi|808887278|gb|KKF33682.1|/0/Transmembrane protein 22 [Larimichthys crocea]	D3YVE8/4e-112/ S35G2_MOUSE Solute carrier family 35 member G2 OS=Mus musculus GN=Slc35g2 PE=1 SV=1	NA	NA
S.schlegelii_GLEAN_10022242	-7.1752	5.8963	5.46372e-14	6.16878e-12	gi|242021879|ref|XP_002431370.1|/1.12207e-121/ADP-ribosylation factor, putative [Pediculus humanus corporis] &gt;gi|212516646|gb|EEB18632.1| ADP-ribosylation factor, putative [Pediculus humanus corporis]	P61210/3e-119/ ARF1_LOCMI ADP-ribosylation factor 1 OS=Locusta migratoria GN=ARF1 PE=2 SV=2	amex:103047326/2e-119/ADP-ribosylation factor 1; K07937 ADP-ribosylation factor 1	biological_process:GO:0007264//small GTPase mediated signal transduction;cellular_component:GO:0005622//intracellular;molecular_function:GO:0005525//GTP binding;
S.schlegelii_GLEAN_10004063	-7.161	5.87869	9.14138e-13	8.35511e-11	gi|657537499|ref|XP_008275190.1|/0/PREDICTED: E3 ubiquitin-protein ligase rnf146-like isoform X2 [Stegastes partitus]	C0HBT3/2e-148/ RN146_SALSA E3 ubiquitin-protein ligase rnf146 OS=Salmo salar GN=rnf146 PE=2 SV=1	hcq:109531049/0.0/rnf146; E3 ubiquitin-protein ligase RNF146; K15700 E3 ubiquitin-protein ligase RNF146 [EC:2.3.2.27]	molecular_function:GO:0005515//protein binding;GO:0008270//zinc ion binding;
S.schlegelii_GLEAN_10004091	-7.14981	5.87514	1.00285e-13	1.07683e-11	gi|736172057|ref|XP_010766144.1|/3.86553e-160/PREDICTED: uncharacterized protein LOC104942599 [Notothenia coriiceps]	NA	tru:101064523/1e-37/krev interaction trapped protein 1-like; K17705 Krev interaction trapped protein 1	NA
S.schlegelii_GLEAN_10011295	-7.10498	5.83964	1.87752e-13	1.90922e-11	gi|808867654|gb|KKF18169.1|/0/Nuclear factor interleukin-3-regulated protein [Larimichthys crocea]	Q68EL6/2e-166/ NFIL3_DANRE Nuclear factor interleukin-3-regulated protein OS=Danio rerio GN=nfil3 PE=2 SV=1	lco:104940000/0.0/nfil3; nuclear factor, interleukin 3 regulated; K09059 nuclear factor, interleukin 3 regulated	biological_process:GO:0006351//transcription, DNA-templated;GO:0006355//regulation of transcription, DNA-templated;GO:0006366//transcription from RNA polymerase II promoter;GO:0006955//immune response;GO:0007623//circadian rhythm;cellular_component:GO:0005634//nucleus;molecular_function:GO:0003700//sequence-specific DNA binding transcription factor activity;GO:0043565//sequence-specific DNA bindi…
S.schlegelii_GLEAN_10006123	-7.08932	5.83668	1.76094e-10	1.03997e-08	gi|542210905|ref|XP_003444825.2|/5.08609e-76/PREDICTED: transcription factor HES-5-like [Oreochromis niloticus]	Q03062/2e-32/ HES5_RAT Transcription factor HES-5 OS=Rattus norvegicus GN=Hes5 PE=2 SV=1	mze:101486618/4e-76/transcription factor HES-5-like; K06055 hairy and enhancer of split 5	biological_process:GO:0006355//regulation of transcription, DNA-templated;molecular_function:GO:0003677//DNA binding;GO:0046983//protein dimerization activity;
S.schlegelii_GLEAN_10019263	-7.08565	5.82965	2.20211e-10	1.27598e-08	gi|808869523|gb|KKF19535.1|/0/Proto-oncogene [Larimichthys crocea]	P53450/0.0/ FOS_TAKRU Proto-oncogene c-Fos OS=Takifugu rubripes GN=fos PE=3 SV=1	lco:104922420/0.0/proto-oncogene c-Fos-like; K04379 proto-oncogene protein c-fos	biological_process:GO:0006355//regulation of transcription, DNA-templated;GO:0006357//regulation of transcription from RNA polymerase II promoter;cellular_component:GO:0005667//transcription factor complex;molecular_function:GO:0003677//DNA binding;GO:0003700//sequence-specific DNA binding transcription factor activity;GO:0043565//sequence-specific DNA binding;
S.schlegelii_GLEAN_10007862	-7.04639	5.79557	8.48779e-12	6.48408e-10	gi|657599391|ref|XP_008304505.1|/5.61804e-154/PREDICTED: ras-related protein Rab-39B-like [Stegastes partitus]	Q17QU4/2e-137/ RB39B_BOVIN Ras-related protein Rab-39B OS=Bos taurus GN=RAB39B PE=2 SV=1	ncc:104966994/3e-152/ras-related protein Rab-39B-like; K07925 Ras-related protein Rab-39B	biological_process:GO:0006886//intracellular protein transport;GO:0006913//nucleocytoplasmic transport;GO:0007165//signal transduction;GO:0007264//small GTPase mediated signal transduction;GO:0015031//protein transport;cellular_component:GO:0005622//intracellular;GO:0016020//membrane;molecular_function:GO:0003924//GTPase activity;GO:0005525//GTP binding;
S.schlegelii_GLEAN_10002433	-7.04077	5.78632	3.66582e-13	3.58527e-11	gi|734633654|ref|XP_010745324.1|/4.22032e-75/PREDICTED: LOW QUALITY PROTEIN: sodium channel protein type 4 subunit alpha B-like [Larimichthys crocea]	Q20JQ7/1e-56/ SC4AB_DANRE Sodium channel protein type 4 subunit alpha B OS=Danio rerio GN=scn4ab PE=2 SV=1	lco:104931902/1e-75/sodium channel protein type 4 subunit alpha B-like; K04837 voltage-gated sodium channel type IV alpha	NA
S.schlegelii_GLEAN_10008329	-7.02996	5.78424	7.38662e-11	4.62945e-09	gi|808867007|gb|KKF17626.1|/1.54843e-98/hypothetical protein EH28_13790 [Larimichthys crocea]	Q9R182/3e-06/ ANGL3_MOUSE Angiopoietin-related protein 3 OS=Mus musculus GN=Angptl3 PE=1 SV=1	cge:100754950/5e-06/Angptl3; angiopoietin like 3; K22288 angiopoietin-like 3	NA
S.schlegelii_GLEAN_10017140	-7.01705	5.77089	5.6805e-12	4.56671e-10	gi|657589438|ref|XP_008299107.1|/3.42836e-145/PREDICTED: probable N-acetyltransferase camello [Stegastes partitus] &gt;gi|657589440|ref|XP_008299108.1| PREDICTED: probable N-acetyltransferase camello [Stegastes partitus]	Q66KL0/1e-47/ CMLO_XENTR Probable N-acetyltransferase camello OS=Xenopus tropicalis GN=cml PE=2 SV=1	lcf:108876605/2e-150/nat8; N-acetyltransferase 8; K20838 N-acetyltransferase 8 [EC:2.3.1.80 2.3.1.-]	molecular_function:GO:0008080//N-acetyltransferase activity;
S.schlegelii_GLEAN_10010872	-7.00094	5.75209	6.22264e-13	5.75595e-11	gi|77864331|gb|ABB05054.1|/1.01025e-146/caspase-1 [Dicentrarchus labrax] &gt;gi|77864333|gb|ABB05055.1| caspase-1 [Dicentrarchus labrax]	Q9TV13/1e-54/ CASP1_HORSE Caspase-1 OS=Equus caballus GN=CASP1 PE=2 SV=1	lcf:108900839/1e-145/LOW QUALITY PROTEIN: caspase-1-like; K01370 caspase 1 [EC:3.4.22.36]	biological_process:GO:0006508//proteolysis;GO:0006915//apoptotic process;molecular_function:GO:0004197//cysteine-type endopeptidase activity;GO:0008234//cysteine-type peptidase activity;
S.schlegelii_GLEAN_10009030	-6.98162	5.73784	5.95305e-13	5.57372e-11	gi|928013077|ref|XP_013872671.1|/2.69586e-142/PREDICTED: zinc finger BED domain-containing protein 5-like [Austrofundulus limnaeus]	A4Z944/7e-42/ ZBED5_CANLF Zinc finger BED domain-containing protein 5 OS=Canis lupus familiaris GN=ZBED5 PE=4 SV=1	gja:107122456/2e-40/zinc finger protein 208-like; K09228 KRAB domain-containing zinc finger protein	NA
S.schlegelii_GLEAN_10000199	-6.93772	5.72002	1.17489e-08	4.95615e-07	gi|410927179|ref|XP_003977042.1|/3.72191e-176/PREDICTED: trace amine-associated receptor 1-like [Takifugu rubripes]	Q8HZ64/4e-114/ TAAR1_MACMU Trace amine-associated receptor 1 OS=Macaca mulatta GN=TAAR1 PE=3 SV=1	tru:101065853/7e-177/trace amine-associated receptor 1-like; K05051 trace amine associated receptor	biological_process:GO:0007186//G-protein coupled receptor signaling pathway;cellular_component:GO:0016021//integral component of membrane;molecular_function:GO:0001594//trace-amine receptor activity;GO:0004930//G-protein coupled receptor activity;
S.schlegelii_GLEAN_10022844	-6.91821	5.68875	5.48632e-12	4.45883e-10	gi|734617313|ref|XP_010736347.1|/4.05559e-176/PREDICTED: protein CLN8 [Larimichthys crocea]	Q9UBY8/1e-110/ CLN8_HUMAN Protein CLN8 OS=Homo sapiens GN=CLN8 PE=1 SV=3	lcf:108897976/7e-180/cln8; protein CLN8; K12360 ceroid-lipofuscinosis neuronal protein 8	cellular_component:GO:0016021//integral component of membrane;
S.schlegelii_GLEAN_10002106	-6.89945	5.67969	7.99596e-10	4.16196e-08	gi|317419823|emb|CBN81859.1|/5.12983e-109/Lipocalin [Dicentrarchus labrax]	Q01584/6e-34/ LIPO_RHIMB Lipocalin OS=Rhinella marina PE=1 SV=1	lcf:108900765/1e-103/lipocalin-like; K01830 prostaglandin-H2 D-isomerase [EC:5.3.99.2]	biological_process:GO:0006629//lipid metabolic process;GO:0006810//transport;molecular_function:GO:0005215//transporter activity;GO:0036094//small molecule binding;
S.schlegelii_GLEAN_10000198	-6.86687	5.66107	9.79982e-09	4.16832e-07	gi|410927179|ref|XP_003977042.1|/2.26453e-174/PREDICTED: trace amine-associated receptor 1-like [Takifugu rubripes]	Q8HZ64/3e-114/ TAAR1_MACMU Trace amine-associated receptor 1 OS=Macaca mulatta GN=TAAR1 PE=3 SV=1	tru:101065853/4e-175/trace amine-associated receptor 1-like; K05051 trace amine associated receptor	biological_process:GO:0007186//G-protein coupled receptor signaling pathway;cellular_component:GO:0016021//integral component of membrane;molecular_function:GO:0001594//trace-amine receptor activity;GO:0004930//G-protein coupled receptor activity;
S.schlegelii_GLEAN_10006208	-6.86552	5.64736	1.50259e-11	1.08832e-09	gi|657576679|ref|XP_008292131.1|/3.34516e-105/PREDICTED: uncharacterized protein KIAA0232 homolog [Stegastes partitus]	Q92628/1e-42/ K0232_HUMAN Uncharacterized protein KIAA0232 OS=Homo sapiens GN=KIAA0232 PE=1 SV=5	NA	NA
S.schlegelii_GLEAN_10007648	-6.8291	5.61651	1.33605e-11	9.76907e-10	gi|808885800|gb|KKF32491.1|/0/Alpha-2A adrenergic receptor [Larimichthys crocea]	Q90WY4/0.0/ ADA2A_DANRE Alpha-2A adrenergic receptor OS=Danio rerio GN=adra2a PE=3 SV=1	lco:104922185/0.0/adra2a; adrenoceptor alpha 2A; K04138 adrenergic receptor alpha-2A	biological_process:GO:0007186//G-protein coupled receptor signaling pathway;cellular_component:GO:0016021//integral component of membrane;molecular_function:GO:0004930//G-protein coupled receptor activity;GO:0004935//adrenergic receptor activity;
S.schlegelii_GLEAN_10008131	-6.82908	5.61668	4.61708e-12	3.853e-10	gi|808873898|gb|KKF23113.1|/0/Potassium voltage-gated channel subfamily S member 3 [Larimichthys crocea]	Q9TT17/0.0/ KCNS3_RABIT Potassium voltage-gated channel subfamily S member 3 OS=Oryctolagus cuniculus GN=KCNS3 PE=2 SV=1	lco:104926759/0.0/kcns3; potassium voltage-gated channel modifier subfamily S member 3; K04933 potassium voltage-gated channel delayed-rectifier subfamily S member 3	biological_process:GO:0006811//ion transport;GO:0006813//potassium ion transport;GO:0051260//protein homooligomerization;GO:0055085//transmembrane transport;cellular_component:GO:0008076//voltage-gated potassium channel complex;GO:0016020//membrane;molecular_function:GO:0005216//ion channel activity;GO:0005249//voltage-gated potassium channel activity;GO:0005515//protein binding;
S.schlegelii_GLEAN_10021935	-6.82553	5.6136	6.67907e-12	5.28645e-10	gi|808880873|gb|KKF28584.1|/5.47793e-97/Relaxin-3 [Larimichthys crocea]	Q8CHK2/8e-15/ REL3_MOUSE Relaxin-3 OS=Mus musculus GN=Rln3 PE=2 SV=1	lco:104923627/1e-97/Relaxin-3; relaxin-3-like; K22000 relaxin 3	cellular_component:GO:0005576//extracellular region;molecular_function:GO:0005179//hormone activity;
S.schlegelii_GLEAN_10006080	-6.75508	5.56065	6.82811e-11	4.31463e-09	gi|808875440|gb|KKF24259.1|/2.04872e-86/hypothetical protein EH28_21567 [Larimichthys crocea]	Q5T7N2/1e-08/ LITD1_HUMAN LINE-1 type transposase domain-containing protein 1 OS=Homo sapiens GN=L1TD1 PE=1 SV=1	xma:102230673/3e-55/agl; amylo-alpha-1, 6-glucosidase, 4-alpha-glucanotransferase; K01196 glycogen debranching enzyme [EC:2.4.1.25 3.2.1.33]	NA
S.schlegelii_GLEAN_10003997	-6.74116	5.54821	4.35863e-11	2.88477e-09	gi|209730318|gb|ACI66028.1|/3.30323e-145/Transposable element Tcb1 transposase [Salmo salar]	P35072/2e-33/ TCB1_CAEBR Transposable element Tcb1 transposase OS=Caenorhabditis briggsae PE=3 SV=1	sgh:107575789/3e-92/receptor-type tyrosine-protein phosphatase zeta-like; K08114 receptor-type tyrosine-protein phosphatase zeta [EC:3.1.3.48]	biological_process:GO:0006313//transposition, DNA-mediated;GO:0015074//DNA integration;molecular_function:GO:0003677//DNA binding;
S.schlegelii_GLEAN_10020910	-6.73039	5.53883	5.94206e-10	3.16699e-08	gi|734627917|ref|XP_010742167.1|/0/PREDICTED: forkhead box protein E1 [Larimichthys crocea]	Q5J3Q5/3e-121/ FOXE1_XENLA Forkhead box protein E1 OS=Xenopus laevis GN=foxe1 PE=2 SV=1	lco:104929366/0.0/foxe1; forkhead box E1; K09398 forkhead box protein E	biological_process:GO:0006355//regulation of transcription, DNA-templated;molecular_function:GO:0003700//sequence-specific DNA binding transcription factor activity;GO:0043565//sequence-specific DNA binding;
S.schlegelii_GLEAN_10010075	-6.72986	5.54484	9.80957e-10	5.03766e-08	gi|736171911|ref|XP_010766104.1|/1.03566e-114/PREDICTED: transcription initiation factor TFIID subunit 11 [Notothenia coriiceps] &gt;gi|736171915|ref|XP_010766105.1| PREDICTED: transcription initiation factor TFIID subunit 11 [Notothenia coriiceps]	Q5RA91/2e-76/ TAF11_PONAB Transcription initiation factor TFIID subunit 11 OS=Pongo abelii GN=TAF11 PE=2 SV=1	ncc:104942562/2e-115/taf11; transcription initiation factor TFIID subunit 11; K03135 transcription initiation factor TFIID subunit 11	biological_process:GO:0006367//transcription initiation from RNA polymerase II promoter;cellular_component:GO:0005634//nucleus;
S.schlegelii_GLEAN_10003231	-6.71982	5.5488	8.52638e-08	2.98229e-06	gi|808860178|gb|KKF12219.1|/0/Protein NLRC3 [Larimichthys crocea]	Q7RTR2/2e-66/ NLRC3_HUMAN NLR family CARD domain-containing protein 3 OS=Homo sapiens GN=NLRC3 PE=1 SV=2	lcf:108892181/0.0/NACHT, LRR and PYD domains-containing protein 12-like; K20865 NACHT, LRR and PYD domains-containing protein 12	NA
S.schlegelii_GLEAN_10009292	-6.68702	5.50644	7.58531e-11	4.73465e-09	gi|736219465|ref|XP_010779469.1|/1.0404e-79/PREDICTED: retinoid-binding protein 7 [Notothenia coriiceps]	Q9EPC5/2e-56/ RET7_MOUSE Retinoid-binding protein 7 OS=Mus musculus GN=Rbp7 PE=1 SV=1	lcf:108876371/1e-77/nmnat1; LOW QUALITY PROTEIN: nicotinamide/nicotinic acid mononucleotide adenylyltransferase 1; K06210 nicotinamide mononucleotide adenylyltransferase [EC:2.7.7.1 2.7.7.18]	biological_process:GO:0006810//transport;molecular_function:GO:0005215//transporter activity;GO:0008289//lipid binding;
S.schlegelii_GLEAN_10002665	-6.64633	5.47453	2.48304e-10	1.42265e-08	gi|808860178|gb|KKF12219.1|/0/Protein NLRC3 [Larimichthys crocea]	Q7RTR2/3e-75/ NLRC3_HUMAN NLR family CARD domain-containing protein 3 OS=Homo sapiens GN=NLRC3 PE=1 SV=2	lcf:108892181/0.0/NACHT, LRR and PYD domains-containing protein 12-like; K20865 NACHT, LRR and PYD domains-containing protein 12	NA
S.schlegelii_GLEAN_10007959	-6.62896	5.46783	2.72225e-09	1.31862e-07	gi|808866316|gb|KKF17050.1|/0/Zinc finger protein 287 [Larimichthys crocea]	P18729/9e-57/ ZG57_XENLA Gastrula zinc finger protein XlCGF57.1 (Fragment) OS=Xenopus laevis PE=3 SV=1	lcf:108884578/6e-93/gastrula zinc finger protein xFG20-1-like; K09228 KRAB domain-containing zinc finger protein	molecular_function:GO:0046872//metal ion binding;
S.schlegelii_GLEAN_10003505	-6.60822	5.44667	3.92374e-10	2.15175e-08	gi|658913599|ref|XP_008396746.1|/8.71287e-72/PREDICTED: myristoylated alanine-rich C-kinase substrate [Poecilia reticulata]	P16527/3e-32/ MARCS_CHICK Myristoylated alanine-rich C-kinase substrate OS=Gallus gallus GN=MARCKS PE=1 SV=2	pret:103458005/2e-72/marcks; myristoylated alanine-rich C-kinase substrate; K12561 myristoylated alanine-rich C-kinase substrate	molecular_function:GO:0005516//calmodulin binding;
S.schlegelii_GLEAN_10022460	-6.60795	5.44742	9.68682e-10	4.99132e-08	gi|908547701|ref|XP_013121315.1|/1.00241e-78/PREDICTED: B-cell receptor CD22-like [Oreochromis niloticus]	Q28260/1e-07/ VCAM1_CANLF Vascular cell adhesion protein 1 OS=Canis lupus familiaris GN=VCAM1 PE=2 SV=1	lco:104927518/1e-37/B-cell receptor CD22-like; K06467 CD22 antigen	molecular_function:GO:0005515//protein binding;
S.schlegelii_GLEAN_10008506	-6.58328	5.42703	5.62243e-10	3.0081e-08	gi|229366590|gb|ACQ58275.1|/1.47126e-47/Interleukin-8 precursor [Anoplopoma fimbria]	P08317/2e-16/ IL8_CHICK Interleukin-8 OS=Gallus gallus GN=CXCL8 PE=2 SV=1	lcf:108903099/1e-47/interleukin-8-like; K10030 interleukin 8	biological_process:GO:0006955//immune response;cellular_component:GO:0005576//extracellular region;molecular_function:GO:0008009//chemokine activity;
S.schlegelii_GLEAN_10004249	-6.57963	5.42411	3.28183e-10	1.84588e-08	gi|736207228|ref|XP_010776174.1|/4.98303e-146/PREDICTED: GTPase IMAP family member 7-like isoform X1 [Notothenia coriiceps] &gt;gi|736207232|ref|XP_010776176.1| PREDICTED: GTPase IMAP family member 7-like isoform X2 [Notothenia coriiceps]	Q8NHV1/5e-44/ GIMA7_HUMAN GTPase IMAP family member 7 OS=Homo sapiens GN=GIMAP7 PE=1 SV=1	lcf:108890831/3e-117/uncharacterized protein LOC108890831; K15261 poly [ADP-ribose] polymerase 10/14/15 [EC:2.4.2.30]	molecular_function:GO:0005525//GTP binding;
S.schlegelii_GLEAN_10000471	-6.57579	5.42161	3.49304e-10	1.95039e-08	gi|961868812|ref|XP_014894602.1|/4.9008e-166/PREDICTED: olfactory receptor 11A1-like isoform X1 [Poecilia latipinna]	Q9GZK7/3e-43/ O11A1_HUMAN Olfactory receptor 11A1 OS=Homo sapiens GN=OR11A1 PE=2 SV=1	lcf:108902877/1e-168/olfactory receptor 11A1-like; K04257 olfactory receptor	biological_process:GO:0007186//G-protein coupled receptor signaling pathway;cellular_component:GO:0016021//integral component of membrane;molecular_function:GO:0004930//G-protein coupled receptor activity;GO:0004984//olfactory receptor activity;
S.schlegelii_GLEAN_10003285	-6.56566	5.4138	3.78486e-10	2.09807e-08	gi|808860759|gb|KKF12709.1|/0/Prolactin-releasing peptide receptor [Larimichthys crocea]	Q6VMN6/4e-113/ PRLHR_MOUSE Prolactin-releasing peptide receptor OS=Mus musculus GN=Prlhr PE=2 SV=2	lcf:108879852/0.0/prolactin-releasing peptide receptor-like; K04314 prolactin releasing hormone receptor	biological_process:GO:0007186//G-protein coupled receptor signaling pathway;cellular_component:GO:0016021//integral component of membrane;molecular_function:GO:0004930//G-protein coupled receptor activity;GO:0004983//neuropeptide Y receptor activity;
S.schlegelii_GLEAN_10003377	-6.54805	5.40563	4.38471e-09	1.99193e-07	gi|657585838|ref|XP_008297133.1|/0/PREDICTED: probable G-protein coupled receptor 132 [Stegastes partitus]	Q9Z282/6e-96/ GP132_MOUSE Probable G-protein coupled receptor 132 OS=Mus musculus GN=Gpr132 PE=1 SV=1	lcf:108890018/0.0/probable G-protein coupled receptor 132; K08426 G protein-coupled receptor 132	biological_process:GO:0007186//G-protein coupled receptor signaling pathway;cellular_component:GO:0016021//integral component of membrane;molecular_function:GO:0004930//G-protein coupled receptor activity;
S.schlegelii_GLEAN_10023189	-6.51606	5.3757	3.1505e-09	1.48392e-07	gi|962014590|ref|XP_014879809.1|/9.69512e-87/PREDICTED: unconventional myosin-VI-like [Poecilia latipinna]	Q29122/4e-78/ MYO6_PIG Unconventional myosin-VI OS=Sus scrofa GN=MYO6 PE=1 SV=1	mze:101466186/2e-87/unconventional myosin-VI-like; K10358 myosin VI	NA
S.schlegelii_GLEAN_10014299	-6.45427	5.32879	3.87364e-09	1.78815e-07	gi|736159515|ref|XP_010783144.1|/0/PREDICTED: cathepsin S-like [Notothenia coriiceps]	Q8HY82/4e-137/ CATS_SAIBB Cathepsin S OS=Saimiri boliviensis boliviensis GN=CTSS PE=2 SV=1	lcf:108898158/0.0/LOW QUALITY PROTEIN: cathepsin S-like; K01368 cathepsin S [EC:3.4.22.27]	biological_process:GO:0006508//proteolysis;molecular_function:GO:0008234//cysteine-type peptidase activity;
S.schlegelii_GLEAN_10012301	-6.45304	5.33169	6.10214e-09	2.69248e-07	gi|225706672|gb|ACO09182.1|/0/ADP/ATP translocase 2 [Osmerus mordax]	Q09073/0.0/ ADT2_RAT ADP/ATP translocase 2 OS=Rattus norvegicus GN=Slc25a5 PE=1 SV=3	csem:103395576/0.0/ADP/ATP translocase 2; K05863 solute carrier family 25 (mitochondrial adenine nucleotide translocator), member 4/5/6/31	biological_process:GO:0006810//transport;GO:0055085//transmembrane transport;cellular_component:GO:0005743//mitochondrial inner membrane;molecular_function:GO:0005215//transporter activity;
S.schlegelii_GLEAN_10007927	-6.45128	5.3288	2.43205e-09	1.18553e-07	gi|734619956|ref|XP_010737804.1|/0/PREDICTED: claudin-4-like [Larimichthys crocea]	O35054/6e-70/ CLD4_MOUSE Claudin-4 OS=Mus musculus GN=Cldn4 PE=1 SV=1	lco:104925799/0.0/claudin-4-like; K06087 claudin	cellular_component:GO:0005923//tight junction;GO:0016021//integral component of membrane;molecular_function:GO:0005198//structural molecule activity;
S.schlegelii_GLEAN_10019710	-6.43516	5.31702	2.87147e-09	1.37786e-07	gi|808885138|gb|KKF31982.1|/6.57896e-90/Protein FAM18A [Larimichthys crocea]	A6NH52/3e-55/ TV23A_HUMAN Golgi apparatus membrane protein TVP23 homolog A OS=Homo sapiens GN=TVP23A PE=2 SV=3	NA	cellular_component:GO:0016021//integral component of membrane;
S.schlegelii_GLEAN_10011056	-6.42863	5.31288	3.87792e-09	1.78815e-07	gi|229366940|gb|ACQ58450.1|/1.17907e-58/Mitochondrial import inner membrane translocase subunit Tim8 A [Anoplopoma fimbria]	Q90YI5/5e-57/ TIM8A_TAKRU Mitochondrial import inner membrane translocase subunit Tim8 A OS=Takifugu rubripes GN=timm8a PE=3 SV=1	lco:104925366/9e-59/timm8a; translocase of inner mitochondrial membrane 8 homolog A (yeast); K17780 mitochondrial import inner membrane translocase subunit TIM8	NA
S.schlegelii_GLEAN_10002248	-6.40935	5.29724	3.26027e-09	1.52626e-07	gi|554839053|ref|XP_005929970.1|/0/PREDICTED: cytochrome P450 2K1-like [Haplochromis burtoni]	Q92090/0.0/ CP2K1_ONCMY Cytochrome P450 2K1 OS=Oncorhynchus mykiss GN=cyp2k1 PE=2 SV=1	lco:104939016/0.0/cytochrome P450 2K1-like; K17854 cytochrome P450 family 2 subfamily K	biological_process:GO:0055114//oxidation-reduction process;molecular_function:GO:0005506//iron ion binding;GO:0016705//oxidoreductase activity, acting on paired donors, with incorporation or reduction of molecular oxygen;GO:0020037//heme binding;
S.schlegelii_GLEAN_10006890	-6.40729	5.3004	5.00435e-08	1.87877e-06	gi|930772782|ref|XP_014186349.1|/3.3967e-134/PREDICTED: zinc-binding protein A33-like [Haplochromis burtoni]	P19474/3e-62/ RO52_HUMAN E3 ubiquitin-protein ligase TRIM21 OS=Homo sapiens GN=TRIM21 PE=1 SV=1	xma:102226365/1e-123/nuclear factor 7, brain-like; K10651 tripartite motif-containing protein 21 [EC:2.3.2.27]	molecular_function:GO:0005515//protein binding;GO:0008270//zinc ion binding;GO:0046872//metal ion binding;
S.schlegelii_GLEAN_10014015	-6.30172	5.22127	4.14699e-08	1.58401e-06	gi|808865588|gb|KKF16440.1|/5.06329e-133/Lysoplasmalogenase [Larimichthys crocea]	F1RMN2/2e-23/ TM86B_PIG Lysoplasmalogenase OS=Sus scrofa GN=TMEM86B PE=3 SV=1	lcf:108881012/8e-131/lysoplasmalogenase-like; K18575 alkenylglycerophosphocholine hydrolase [EC:3.3.2.2]	cellular_component:GO:0016021//integral component of membrane;
S.schlegelii_GLEAN_10008300	-6.28569	5.20823	1.24009e-08	5.18845e-07	gi|736203591|ref|XP_010775188.1|/4.01665e-83/PREDICTED: C2 calcium-dependent domain-containing protein 4C-like [Notothenia coriiceps] &gt;gi|736203595|ref|XP_010775189.1| PREDICTED: C2 calcium-dependent domain-containing protein 4C-like [Notothenia coriiceps]	Q5HZI2/5e-43/ C2C4C_MOUSE C2 calcium-dependent domain-containing protein 4C OS=Mus musculus GN=C2cd4cC2CD4 family PE=1 SV=1	crg:105338029/5e-11/synaptotagmin-4; K15290 synaptotagmin-1	molecular_function:GO:0005515//protein binding;
S.schlegelii_GLEAN_10000915	-6.28289	5.20621	1.22744e-08	5.16366e-07	gi|808882825|gb|KKF30142.1|/1.12556e-123/Ig kappa chain V-V region HP 91A3 [Larimichthys crocea]	P01647/2e-07/ KV5AE_MOUSE Ig kappa chain V-V region HP 124E1 OS=Mus musculus PE=1 SV=1	lcf:108895082/1e-103/uncharacterized protein LOC108895082; K16826 signal-regulatory protein beta 2	molecular_function:GO:0005515//protein binding;
S.schlegelii_GLEAN_10007610	-6.27684	5.20178	3.71791e-08	1.438e-06	gi|736197413|ref|XP_010773263.1|/1.10122e-110/PREDICTED: uncharacterized protein LOC104948734 [Notothenia coriiceps]	NA	NA	NA
S.schlegelii_GLEAN_10005523	-6.26691	5.19523	3.09107e-08	1.2139e-06	gi|736298446|ref|XP_010792275.1|/0/PREDICTED: uracil nucleotide/cysteinyl leukotriene receptor [Notothenia coriiceps]	Q09QM4/1e-129/ GPR17_RAT Uracil nucleotide/cysteinyl leukotriene receptor OS=Rattus norvegicus GN=Gpr17 PE=2 SV=1	ncc:104965032/0.0/gpr17; uracil nucleotide/cysteinyl leukotriene receptor; K08404 G protein-coupled receptor 17	biological_process:GO:0007186//G-protein coupled receptor signaling pathway;cellular_component:GO:0016021//integral component of membrane;molecular_function:GO:0004930//G-protein coupled receptor activity;
S.schlegelii_GLEAN_10017862	-6.26243	5.19286	5.33047e-08	1.97704e-06	gi|736167865|ref|XP_010764962.1|/1.72717e-138/PREDICTED: transcription factor Spi-B-like [Notothenia coriiceps]	Q1RML4/2e-37/ SPIC_BOVIN Transcription factor Spi-C OS=Bos taurus GN=SPIC PE=2 SV=1	ncc:104941552/3e-139/transcription factor Spi-B-like; K09438 transcription factor PU.1	biological_process:GO:0006355//regulation of transcription, DNA-templated;molecular_function:GO:0003700//sequence-specific DNA binding transcription factor activity;GO:0043565//sequence-specific DNA binding;
S.schlegelii_GLEAN_10010443	-6.2427	5.17777	3.35911e-08	1.3058e-06	gi|736224339|ref|XP_010780788.1|/0/PREDICTED: gap junction alpha-8 protein [Notothenia coriiceps]	P48165/3e-175/ CXA8_HUMAN Gap junction alpha-8 protein OS=Homo sapiens GN=GJA8 PE=1 SV=3	ncc:104955221/0.0/gja8; gap junction alpha-8 protein; K07617 gap junction alpha-8 protein	biological_process:GO:0007154//cell communication;cellular_component:GO:0005922//connexon complex;
S.schlegelii_GLEAN_10011478	-6.22113	5.16345	7.56242e-08	2.68604e-06	gi|736262929|ref|XP_010790305.1|/6.69444e-65/PREDICTED: 28 kDa heat- and acid-stable phosphoprotein-like [Notothenia coriiceps]	Q13442/7e-43/ HAP28_HUMAN 28 kDa heat- and acid-stable phosphoprotein OS=Homo sapiens GN=PDAP1 PE=1 SV=1	NA	NA
S.schlegelii_GLEAN_10016372	-6.21703	5.16785	5.7947e-07	1.73446e-05	gi|734649608|ref|XP_010754098.1|/0/PREDICTED: galactose-3-O-sulfotransferase 2-like [Larimichthys crocea]	Q6XQH0/1e-108/ G3ST2_MOUSE Galactose-3-O-sulfotransferase 2 OS=Mus musculus GN=Gal3st2 PE=2 SV=1	lcf:108900565/0.0/galactose-3-O-sulfotransferase 2-like isoform X1; K09675 galactose-3-O-sulfotransferase 2 [EC:2.8.2.-]	biological_process:GO:0009247//glycolipid biosynthetic process;cellular_component:GO:0005794//Golgi apparatus;GO:0016021//integral component of membrane;molecular_function:GO:0001733//galactosylceramide sulfotransferase activity;
S.schlegelii_GLEAN_10021755	-6.20205	5.14632	1.71751e-07	5.65932e-06	gi|657568266|ref|XP_008287558.1|/0/PREDICTED: uridine-cytidine kinase 1 [Stegastes partitus]	Q66I71/1e-164/ UCK1_DANRE Uridine-cytidine kinase 1 OS=Danio rerio GN=uck1 PE=2 SV=1	lcf:108873983/0.0/uck1; uridine-cytidine kinase 1; K00876 uridine kinase [EC:2.7.1.48]	biological_process:GO:0008152//metabolic process;molecular_function:GO:0005524//ATP binding;GO:0016301//kinase activity;GO:0019206//nucleoside kinase activity;
S.schlegelii_GLEAN_10007057	-6.18301	5.13534	1.07844e-07	3.68809e-06	gi|657536374|ref|XP_008274781.1|/1.22946e-114/PREDICTED: rhomboid domain-containing protein 3 [Stegastes partitus] &gt;gi|657536377|ref|XP_008274782.1| PREDICTED: rhomboid domain-containing protein 3 [Stegastes partitus]	Q9Y3P4/2e-20/ RHBD3_HUMAN Rhomboid domain-containing protein 3 OS=Homo sapiens GN=RHBDD3 PE=2 SV=1	NA	NA
S.schlegelii_GLEAN_10003357	-6.17885	5.13247	5.82937e-08	2.13628e-06	gi|808883433|gb|KKF30609.1|/1.07726e-77/T-cell receptor alpha chain V region CTL-F3 [Larimichthys crocea]	P06323/5e-15/ TVA3_MOUSE T-cell receptor alpha chain V region CTL-F3 OS=Mus musculus PE=1 SV=1	tru:101074543/1e-46/TRAV1J2C, TRAV2J13C, TRAV3J3C; uncharacterized LOC101074543; K10784 T cell receptor alpha chain V region	molecular_function:GO:0005515//protein binding;
S.schlegelii_GLEAN_10018262	-6.16301	5.12205	1.29367e-07	4.3754e-06	gi|657559884|ref|XP_008283778.1|/0/PREDICTED: Krueppel-like factor 4 [Stegastes partitus] &gt;gi|657559887|ref|XP_008283779.1| PREDICTED: Krueppel-like factor 4 [Stegastes partitus]	Q60793/3e-97/ KLF4_MOUSE Krueppel-like factor 4 OS=Mus musculus GN=Klf4 PE=1 SV=3	lco:104928402/0.0/klf4; Kruppel like factor 4; K17846 krueppel-like factor 4	molecular_function:GO:0046872//metal ion binding;
S.schlegelii_GLEAN_10002805	-6.16142	5.1262	4.99394e-07	1.50949e-05	gi|808877394|gb|KKF25861.1|/1.7209e-168/Hyaluronan and proteoglycan link protein 1 [Larimichthys crocea]	Q28381/2e-148/ HPLN1_HORSE Hyaluronan and proteoglycan link protein 1 OS=Equus caballus GN=HAPLN1 PE=2 SV=1	lco:104934957/7e-169/hyaluronan and proteoglycan link protein 1-like; K06848 hyaluronan and proteoglycan link protein 1	biological_process:GO:0007155//cell adhesion;molecular_function:GO:0005540//hyaluronic acid binding;
S.schlegelii_GLEAN_10008844	-6.14947	5.11091	2.84583e-07	9.01139e-06	gi|768920727|ref|XP_003965739.2|/1.42876e-117/PREDICTED: tetraspanin-13 [Takifugu rubripes]	Q5FVL6/2e-87/ TSN13_RAT Tetraspanin-13 OS=Rattus norvegicus GN=Tspan13 PE=2 SV=1	lcf:108899435/8e-121/tetraspanin-13-like isoform X1; K17356 tetraspanin-13/31	cellular_component:GO:0016021//integral component of membrane;
S.schlegelii_GLEAN_10016771	-6.14247	5.10751	1.04407e-07	3.57851e-06	gi|348504744|ref|XP_003439921.1|/3.63107e-151/PREDICTED: ras-related protein Rab-11B [Oreochromis niloticus] &gt;gi|499001218|ref|XP_004554925.1| PREDICTED: ras-related protein Rab-11B [Maylandia zebra] &gt;gi|548379506|ref|XP_005734027.1| PREDICTED: ras-related protein Rab-11B [Pundamilia nyererei] &gt;gi|554876586|ref|XP_005948167.1| PREDICTED: ras-related protein Rab-11B [Haplochromis burtoni]…	P22129/4e-150/ RB11B_DIPOM Ras-related protein Rab-11B OS=Diplobatis ommata PE=2 SV=1	lcf:108879053/7e-152/ras-related protein Rab-11B; K07905 Ras-related protein Rab-11B	biological_process:GO:0006886//intracellular protein transport;GO:0006913//nucleocytoplasmic transport;GO:0007165//signal transduction;GO:0007264//small GTPase mediated signal transduction;GO:0015031//protein transport;cellular_component:GO:0005622//intracellular;GO:0016020//membrane;molecular_function:GO:0003924//GTPase activity;GO:0005525//GTP binding;
S.schlegelii_GLEAN_10006096	-6.1175	5.09134	1.576e-07	5.28372e-06	gi|657526270|ref|XP_008283493.1|/0/PREDICTED: hyaluronidase-2-like [Stegastes partitus]	Q9Z2Q3/4e-163/ HYAL2_RAT Hyaluronidase-2 OS=Rattus norvegicus GN=Hyal2 PE=2 SV=1	lco:104925136/0.0/hyaluronidase-2-like; K01197 hyaluronoglucosaminidase [EC:3.2.1.35]	biological_process:GO:0005975//carbohydrate metabolic process;molecular_function:GO:0004415//hyalurononglucosaminidase activity;
S.schlegelii_GLEAN_10014472	-6.07142	5.05753	2.21121e-07	7.1732e-06	gi|808871997|gb|KKF21563.1|/0/Potassium voltage-gated channel subfamily G member 2 [Larimichthys crocea]	Q8TDN1/2e-162/ KCNG4_HUMAN Potassium voltage-gated channel subfamily G member 4 OS=Homo sapiens GN=KCNG4 PE=1 SV=1	lcf:108876248/0.0/potassium voltage-gated channel subfamily G member 4-like; K04903 potassium voltage-gated channel subfamily G member 4	biological_process:GO:0006811//ion transport;GO:0006813//potassium ion transport;GO:0051260//protein homooligomerization;GO:0055085//transmembrane transport;cellular_component:GO:0008076//voltage-gated potassium channel complex;GO:0016020//membrane;molecular_function:GO:0005216//ion channel activity;GO:0005249//voltage-gated potassium channel activity;
S.schlegelii_GLEAN_10007596	-6.03715	5.03711	6.56676e-07	1.93537e-05	gi|768922122|ref|XP_011604018.1|/0/PREDICTED: protein lifeguard 1-like isoform X4 [Takifugu rubripes]	Q7Z429/1e-124/ LFG1_HUMAN Protein lifeguard 1 OS=Homo sapiens GN=GRINA PE=2 SV=1	lco:104940349/0.0/protein lifeguard 1; K06890 uncharacterized protein	NA
S.schlegelii_GLEAN_10021890	-5.99909	5.0122	1.29822e-06	3.6779e-05	gi|657558950|ref|XP_008283440.1|/0/PREDICTED: E3 ubiquitin-protein ligase RNF170 [Stegastes partitus] &gt;gi|657558953|ref|XP_008283441.1| PREDICTED: E3 ubiquitin-protein ligase RNF170 [Stegastes partitus] &gt;gi|657558956|ref|XP_008283442.1| PREDICTED: E3 ubiquitin-protein ligase RNF170 [Stegastes partitus]	Q7SZN2/1e-135/ RN170_DANRE E3 ubiquitin-protein ligase RNF170 OS=Danio rerio GN=rnf170 PE=2 SV=1	lcf:108879236/0.0/E3 ubiquitin-protein ligase RNF170-like; K15707 RING finger protein 170 [EC:2.3.2.27]	molecular_function:GO:0005515//protein binding;GO:0008270//zinc ion binding;GO:0046872//metal ion binding;
S.schlegelii_GLEAN_10009070	-5.99891	5.01029	6.85508e-07	2.01262e-05	gi|657556800|ref|XP_008282668.1|/2.19271e-79/PREDICTED: gastrotropin [Stegastes partitus]	P51162/2e-36/ FABP6_MOUSE Gastrotropin OS=Mus musculus GN=Fabp6 PE=2 SV=2	lcf:108882950/2e-79/gastrotropin-like; K08755 fatty acid-binding protein 6, ileal (gastrotropin)	biological_process:GO:0006810//transport;GO:0008206//bile acid metabolic process;cellular_component:GO:0005737//cytoplasm;molecular_function:GO:0005215//transporter activity;GO:0008289//lipid binding;GO:0032052//bile acid binding;
S.schlegelii_GLEAN_10023307	-5.99308	5.0054	6.50393e-07	1.92054e-05	gi|966669873|gb|KTG03254.1|/4.17373e-85/hypothetical protein cypCar_00039205, partial [Cyprinus carpio]	NA	ncc:104950413/1e-11/inositol hexakisphosphate and diphosphoinositol-pentakisphosphate kinase 2-like; K13024 inositol-hexakisphosphate/diphosphoinositol-pentakisphosphate 1-kinase [EC:2.7.4.24]	NA
S.schlegelii_GLEAN_10023391	-5.97782	4.99472	8.93007e-07	2.58232e-05	gi|808886959|gb|KKF33448.1|/6.08578e-132/Dual specificity protein phosphatase 26 [Larimichthys crocea]	Q9BV47/3e-77/ DUS26_HUMAN Dual specificity protein phosphatase 26 OS=Homo sapiens GN=DUSP26 PE=1 SV=1	lco:104917865/1e-132/dual specificity protein phosphatase 26; K14165 atypical dual specificity phosphatase [EC:3.1.3.16 3.1.3.48]	biological_process:GO:0006470//protein dephosphorylation;GO:0016311//dephosphorylation;molecular_function:GO:0004725//protein tyrosine phosphatase activity;GO:0008138//protein tyrosine/serine/threonine phosphatase activity;GO:0016791//phosphatase activity;
S.schlegelii_GLEAN_10012206	-5.96885	4.99489	2.693e-06	7.11723e-05	gi|808860119|gb|KKF12168.1|/0/Serine/threonine-protein kinase/endoribonuclease IRE2 [Larimichthys crocea]	O75460/8e-46/ ERN1_HUMAN Serine/threonine-protein kinase/endoribonuclease IRE1 OS=Homo sapiens GN=ERN1 PE=1 SV=2	lco:104939708/0.0/serine/threonine-protein kinase/endoribonuclease IRE1-like; K08852 serine/threonine-protein kinase/endoribonuclease IRE1 [EC:2.7.11.1 3.1.26.-]	biological_process:GO:0006397//mRNA processing;GO:0006468//protein phosphorylation;molecular_function:GO:0004540//ribonuclease activity;GO:0004672//protein kinase activity;GO:0005524//ATP binding;
S.schlegelii_GLEAN_10007585	-5.89632	4.94074	1.07343e-06	3.08085e-05	gi|808857345|gb|KKF09942.1|/4.29457e-129/Sorting nexin-10 [Larimichthys crocea]	F1Q506/5e-76/ SNXAA_DANRE Sorting nexin-10A OS=Danio rerio GN=snx10a PE=1 SV=1	lcf:108891494/2e-132/sorting nexin-10B-like; K17924 sorting nexin-10/11	molecular_function:GO:0035091//phosphatidylinositol binding;
S.schlegelii_GLEAN_10019354	-5.89117	4.93778	1.8355e-06	5.09658e-05	gi|548345403|ref|XP_005725114.1|/0/PREDICTED: protein FAM46A-like [Pundamilia nyererei]	Q96IP4/0.0/ FA46A_HUMAN Protein FAM46A OS=Homo sapiens GN=FAM46A PE=1 SV=2	apla:101803574/4e-171/SLC9A1; solute carrier family 9 member A1; K05742 solute carrier family 9 (sodium/hydrogen exchanger), member 1	NA
S.schlegelii_GLEAN_10012166	-5.8806	4.93077	1.40737e-06	3.96516e-05	gi|736297656|ref|XP_010791994.1|/6.24341e-66/PREDICTED: mucin-2-like [Notothenia coriiceps]	Q7Z5P9/2e-28/ MUC19_HUMAN Mucin-19 OS=Homo sapiens GN=MUC19 PE=1 SV=3	mze:101484881/3e-56/muc19; mucin 19, oligomeric; K22020 mucin-19	NA
S.schlegelii_GLEAN_10021333	-5.87209	4.92531	2.39343e-06	6.36935e-05	gi|736178753|ref|XP_010768031.1|/0/PREDICTED: protein amnionless [Notothenia coriiceps]	Q9BXJ7/4e-76/ AMNLS_HUMAN Protein amnionless OS=Homo sapiens GN=AMN PE=1 SV=2	ncc:104944222/0.0/amn; protein amnionless; K18259 protein amnionless	NA
S.schlegelii_GLEAN_10022598	-5.86744	4.92285	2.7918e-06	7.35302e-05	gi|736170852|ref|XP_010765813.1|/9.26413e-92/PREDICTED: probable RNA-binding protein EIF1AD [Notothenia coriiceps]	Q0V9J5/5e-64/ EIF1A_XENTR Probable RNA-binding protein EIF1AD OS=Xenopus tropicalis GN=eif1ad PE=2 SV=1	ncc:104942307/2e-92/eif1ad; probable RNA-binding protein EIF1AD; K15025 probable RNA-binding protein EIF1AD	biological_process:GO:0006413//translational initiation;molecular_function:GO:0003723//RNA binding;GO:0003743//translation initiation factor activity;
S.schlegelii_GLEAN_10017093	-5.86456	4.9199	2.03065e-06	5.56797e-05	gi|348520630|ref|XP_003447830.1|/3.26365e-133/PREDICTED: vacuolar protein sorting-associated protein 29 isoform X1 [Oreochromis niloticus] &gt;gi|499000669|ref|XP_004554787.1| PREDICTED: vacuolar protein sorting-associated protein 29 isoform X1 [Maylandia zebra] &gt;gi|548352843|ref|XP_005728679.1| PREDICTED: vacuolar protein sorting-associated protein 29 isoform X1 [Pundamilia nyererei] &gt;gi|5…	Q7ZV68/4e-133/ VPS29_DANRE Vacuolar protein sorting-associated protein 29 OS=Danio rerio GN=vps29 PE=2 SV=1	lcf:108902182/6e-134/vps29; vacuolar protein sorting-associated protein 29 isoform X1; K18467 vacuolar protein sorting-associated protein 29	NA
S.schlegelii_GLEAN_10020221	-5.85492	4.91378	2.19683e-06	5.92837e-05	gi|657555451|ref|XP_008282144.1|/0/PREDICTED: UDP-glucuronosyltransferase 2C1-like [Stegastes partitus]	P06133/8e-142/ UD2B4_HUMAN UDP-glucuronosyltransferase 2B4 OS=Homo sapiens GN=UGT2B4 PE=1 SV=2	lco:104939660/0.0/UDP-glucuronosyltransferase 2B4-like; K00699 glucuronosyltransferase [EC:2.4.1.17]	biological_process:GO:0008152//metabolic process;molecular_function:GO:0016758//transferase activity, transferring hexosyl groups;
S.schlegelii_GLEAN_10023050	-5.85176	4.91283	3.17738e-06	8.26927e-05	gi|736246711|ref|XP_010786702.1|/0/PREDICTED: prolactin-releasing peptide receptor-like [Notothenia coriiceps]	Q64121/2e-75/ PRLHR_RAT Prolactin-releasing peptide receptor OS=Rattus norvegicus GN=Prlhr PE=2 SV=1	gja:107124874/2e-122/prolactin-releasing peptide receptor-like; K04314 prolactin releasing hormone receptor	biological_process:GO:0007186//G-protein coupled receptor signaling pathway;cellular_component:GO:0016021//integral component of membrane;molecular_function:GO:0004930//G-protein coupled receptor activity;GO:0004983//neuropeptide Y receptor activity;
S.schlegelii_GLEAN_10010986	-5.84597	4.90649	3.70136e-06	9.5822e-05	gi|317418656|emb|CBN80694.1|/0/Arylacetamide deacetylase-like 4 [Dicentrarchus labrax]	Q5VUY2/2e-96/ ADCL4_HUMAN Arylacetamide deacetylase-like 4 OS=Homo sapiens GN=AADACL4 PE=3 SV=1	lco:104917936/0.0/aadacl4; arylacetamide deacetylase-like 3; K14351 arylacetamide deacetylase-like 3/4 [EC:3.1.1.-]	biological_process:GO:0008152//metabolic process;molecular_function:GO:0016787//hydrolase activity;
S.schlegelii_GLEAN_10018326	-5.83589	4.90292	3.11225e-06	8.12732e-05	gi|734607482|ref|XP_010730938.1|/3.34477e-71/PREDICTED: CDGSH iron-sulfur domain-containing protein 3, mitochondrial [Larimichthys crocea]	B1AR13/2e-28/ CISD3_MOUSE CDGSH iron-sulfur domain-containing protein 3, mitochondrial OS=Mus musculus GN=Cisd3 PE=1 SV=1	smm:Smp_157700/1e-19/hypothetical protein; K09580 protein disulfide-isomerase A1 [EC:5.3.4.1]	cellular_component:GO:0043231//intracellular membrane-bounded organelle;molecular_function:GO:0051537//2 iron, 2 sulfur cluster binding;
S.schlegelii_GLEAN_10023389	-5.80834	4.88713	5.47638e-06	0.000132217	gi|397776428|gb|AFO64912.1|/0/alpha-1-antitrypsin [Oplegnathus fasciatus]	O54758/1e-86/ ALMS_TAMSI Alpha-1-antitrypsin-like protein CM55-MS OS=Tamias sibiricus PE=2 SV=1	lcf:108878236/0.0/serpin A3-5-like; K04525 serpin peptidase inhibitor, clade A	cellular_component:GO:0005615//extracellular space;
S.schlegelii_GLEAN_10014424	-5.80362	4.87728	4.36943e-06	0.000108917	gi|657788826|ref|XP_008321192.1|/2.84772e-86/PREDICTED: CKLF-like MARVEL transmembrane domain-containing protein 7 [Cynoglossus semilaevis]	Q96FZ5/8e-41/ CKLF7_HUMAN CKLF-like MARVEL transmembrane domain-containing protein 7 OS=Homo sapiens GN=CMTM7 PE=1 SV=1	NA	cellular_component:GO:0016020//membrane;
S.schlegelii_GLEAN_10016316	-5.8013	4.8787	2.34484e-06	6.28359e-05	gi|736298245|ref|XP_010792212.1|/2.03973e-125/PREDICTED: zona pellucida-like domain-containing protein 1 [Notothenia coriiceps]	Q8BGZ8/1e-50/ ZPLD1_MOUSE Zona pellucida-like domain-containing protein 1 OS=Mus musculus GN=Zpld1 PE=2 SV=1	ola:101156610/1e-07/uncharacterized protein LOC101156610 isoform X1; K18273 alpha-tectorin	NA
S.schlegelii_GLEAN_10015712	-5.79697	4.879	8.16876e-06	0.000190336	gi|808862900|gb|KKF14341.1|/0/Transmembrane protein 198-B [Larimichthys crocea] &gt;gi|808863813|gb|KKF15056.1| Transmembrane protein 198-B [Larimichthys crocea]	Q6DFQ7/7e-170/ TM198_XENTR Transmembrane protein 198 OS=Xenopus tropicalis GN=tmem198 PE=1 SV=1	NA	NA
S.schlegelii_GLEAN_10011108	-5.79166	4.87494	6.6273e-06	0.000158508	gi|657569617|ref|XP_008288302.1|/2.6327e-156/PREDICTED: platelet-activating factor acetylhydrolase IB subunit gamma [Stegastes partitus] &gt;gi|657569619|ref|XP_008288303.1| PREDICTED: platelet-activating factor acetylhydrolase IB subunit gamma [Stegastes partitus] &gt;gi|657569621|ref|XP_008288304.1| PREDICTED: platelet-activating factor acetylhydrolase IB subunit gamma [Stegastes partitus] &gt;…	Q29460/3e-108/ PA1B3_BOVIN Platelet-activating factor acetylhydrolase IB subunit gamma OS=Bos taurus GN=PAFAH1B3 PE=1 SV=1	lco:104922265/6e-155/pafah1b3; platelet activating factor acetylhydrolase 1b catalytic subunit 3; K16795 platelet-activating factor acetylhydrolase IB subunit beta/gamma [EC:3.1.1.47]	NA
S.schlegelii_GLEAN_10019408	-5.78097	4.86603	4.07109e-06	0.000102815	gi|657751846|ref|XP_008311372.1|/9.30421e-81/PREDICTED: ubiquitin-like protein fubi and ribosomal protein S30 [Cynoglossus semilaevis] &gt;gi|657751848|ref|XP_008311373.1| PREDICTED: ubiquitin-like protein fubi and ribosomal protein S30 [Cynoglossus semilaevis]	P62865/7e-32/ UBIM_BOVIN Ubiquitin-like protein FUBI OS=Bos taurus GN=FAU PE=3 SV=1	csem:103380995/2e-81/fau; ubiquitin-like protein fubi and ribosomal protein S30; K02983 small subunit ribosomal protein S30e	biological_process:GO:0006412//translation;cellular_component:GO:0005622//intracellular;GO:0005840//ribosome;molecular_function:GO:0003735//structural constituent of ribosome;GO:0005515//protein binding;
S.schlegelii_GLEAN_10008654	-5.7803	4.86562	4.28894e-06	0.000107258	gi|657565348|ref|XP_008285967.1|/7.05566e-52/PREDICTED: WEB family protein At1g12150-like [Stegastes partitus]	NA	NA	NA
S.schlegelii_GLEAN_10022164	-5.77873	4.86437	3.93277e-06	9.96497e-05	gi|657565245|ref|XP_008285910.1|/0/PREDICTED: clusterin-like protein 1 [Stegastes partitus]	Q95KN1/8e-63/ CLUL1_CANLF Clusterin-like protein 1 OS=Canis lupus familiaris GN=CLUL1 PE=1 SV=1	cpic:101939774/7e-44/CLU; clusterin; K17252 clusterin	biological_process:GO:0008219//cell death;
S.schlegelii_GLEAN_10005095	-5.77683	4.86574	6.5938e-06	0.000157953	gi|734597948|ref|XP_010744880.1|/3.39222e-178/PREDICTED: amine sulfotransferase-like [Larimichthys crocea]	O35403/1e-77/ ST3A1_MOUSE Amine sulfotransferase OS=Mus musculus GN=Sult3a1 PE=2 SV=1	lco:104931550/2e-176/amine sulfotransferase-like; K16949 amine sulfotransferase [EC:2.8.2.3]	molecular_function:GO:0008146//sulfotransferase activity;
S.schlegelii_GLEAN_10008598	-5.77499	4.8639	7.14227e-06	0.000169767	gi|657537784|ref|XP_008275298.1|/0/PREDICTED: G-protein coupled receptor 20-like [Stegastes partitus]	Q99678/3e-125/ GPR20_HUMAN G-protein coupled receptor 20 OS=Homo sapiens GN=GPR20 PE=1 SV=2	lcf:108889575/0.0/G-protein coupled receptor 20-like; K04317 G protein-coupled receptor 20	biological_process:GO:0007186//G-protein coupled receptor signaling pathway;cellular_component:GO:0016021//integral component of membrane;molecular_function:GO:0004930//G-protein coupled receptor activity;
S.schlegelii_GLEAN_10017592	-5.76805	4.85954	7.47521e-06	0.000176588	gi|72496481|dbj|BAE19668.1|/1.09066e-77/atrial natriuretic peptide [Cottus kazika]	Q805E9/4e-64/ ANF_OREMO Natriuretic peptides A OS=Oreochromis mossambicus GN=nppa PE=2 SV=1	lcf:108900482/6e-78/nppa; natriuretic peptides A; K12334 natriuretic peptide A	cellular_component:GO:0005576//extracellular region;molecular_function:GO:0005179//hormone activity;
S.schlegelii_GLEAN_10002624	-5.76637	4.85641	5.0388e-06	0.000122422	gi|930737346|ref|XP_014189586.1|/0/PREDICTED: membrane progestin receptor beta-like [Haplochromis burtoni] &gt;gi|930737348|ref|XP_014189587.1| PREDICTED: membrane progestin receptor beta-like [Haplochromis burtoni] &gt;gi|930737350|ref|XP_014189588.1| PREDICTED: membrane progestin receptor beta-like [Haplochromis burtoni] &gt;gi|930737352|ref|XP_014189589.1| PREDICTED: membrane progestin recepto…	Q80ZE5/1e-110/ PAQR8_MOUSE Membrane progestin receptor beta OS=Mus musculus GN=Paqr8 PE=2 SV=2	fcd:110844686/6e-17/adiponectin receptor protein-like; K07297 adiponectin receptor	cellular_component:GO:0016021//integral component of membrane;
S.schlegelii_GLEAN_10002951	-5.7623	4.85396	3.82964e-06	9.73577e-05	gi|808876297|gb|KKF24950.1|/0/Adenosine receptor A2a [Larimichthys crocea]	P29274/1e-162/ AA2AR_HUMAN Adenosine receptor A2a OS=Homo sapiens GN=ADORA2A PE=1 SV=2	lco:104926376/0.0/adora2a; adenosine A2a receptor; K04266 adenosine receptor A2a	biological_process:GO:0001973//adenosine receptor signaling pathway;GO:0007186//G-protein coupled receptor signaling pathway;cellular_component:GO:0016021//integral component of membrane;molecular_function:GO:0001609//G-protein coupled adenosine receptor activity;GO:0004930//G-protein coupled receptor activity;
S.schlegelii_GLEAN_10004757	-5.75653	4.8502	6.65388e-06	0.000158896	gi|736248211|ref|XP_010787198.1|/1.76803e-130/PREDICTED: transmembrane protein 74B [Notothenia coriiceps]	Q9NUR3/4e-47/ TM74B_HUMAN Transmembrane protein 74B OS=Homo sapiens GN=TMEM74B PE=2 SV=1	NA	NA
S.schlegelii_GLEAN_10003814	-5.75335	4.84904	4.68019e-06	0.000114799	gi|734594148|ref|XP_010731928.1|/0/PREDICTED: NACHT, LRR and PYD domains-containing protein 3-like [Larimichthys crocea] &gt;gi|734594150|ref|XP_010732002.1| PREDICTED: NACHT, LRR and PYD domains-containing protein 3-like [Larimichthys crocea] &gt;gi|734594152|ref|XP_010732081.1| PREDICTED: NACHT, LRR and PYD domains-containing protein 3-like [Larimichthys crocea]	Q7RTR2/2e-75/ NLRC3_HUMAN NLR family CARD domain-containing protein 3 OS=Homo sapiens GN=NLRC3 PE=1 SV=2	lcf:108882893/0.0/NACHT, LRR and PYD domains-containing protein 3-like isoform X1; K12800 NACHT, LRR and PYD domains-containing protein 3	molecular_function:GO:0005515//protein binding;
S.schlegelii_GLEAN_10003841	-5.74842	4.84575	4.62516e-06	0.000113996	gi|451963752|gb|AGF90789.1|/0/heat shock protein 70 [Sebastes schlegelii]	Q9I8F9/0.0/ HSP71_ORYLA Heat shock 70 kDa protein 1 OS=Oryzias latipes PE=3 SV=1	lcf:108892211/0.0/heat shock 70 kDa protein 1-like; K03283 heat shock 70kDa protein 1/2/6/8	NA
S.schlegelii_GLEAN_10003075	-5.74511	4.84255	4.49902e-06	0.000111603	gi|657570427|ref|XP_008288745.1|/0/PREDICTED: hemojuvelin-like [Stegastes partitus] &gt;gi|657570429|ref|XP_008288746.1| PREDICTED: hemojuvelin-like [Stegastes partitus]	Q8N7M5/3e-124/ RGMC_RAT Hemojuvelin OS=Rattus norvegicus GN=Hfe2 PE=2 SV=1	lco:104937268/0.0/hfe2; hemojuvelin; K06847 RGM domain family	NA
S.schlegelii_GLEAN_10003247	-5.71564	4.82626	1.45609e-05	0.000323563	gi|736252380|ref|XP_010788468.1|/7.12012e-114/PREDICTED: chromatin target of PRMT1 protein isoform X1 [Notothenia coriiceps]	Q9Y3Y2/2e-49/ CHTOP_HUMAN Chromatin target of PRMT1 protein OS=Homo sapiens GN=CHTOP PE=1 SV=2	ccar:109066418/2e-14/atrial natriuretic peptide receptor 1-like; K12323 atrial natriuretic peptide receptor A [EC:4.6.1.2]	NA
S.schlegelii_GLEAN_10024012	-5.70991	4.82184	9.0425e-06	0.00020848	gi|736248417|ref|XP_010787265.1|/2.05215e-96/PREDICTED: ubiquitin-conjugating enzyme E2 D4-like [Notothenia coriiceps]	Q9Y2X8/6e-92/ UB2D4_HUMAN Ubiquitin-conjugating enzyme E2 D4 OS=Homo sapiens GN=UBE2D4 PE=1 SV=1	ncc:104960801/4e-97/ubiquitin-conjugating enzyme E2 D4-like; K06689 ubiquitin-conjugating enzyme E2 D [EC:2.3.2.23]	NA
S.schlegelii_GLEAN_10005380	-5.70947	4.82148	9.74924e-06	0.000222106	gi|348511235|ref|XP_003443150.1|/1.01561e-170/PREDICTED: ribosomal RNA-processing protein 7 homolog A [Oreochromis niloticus]	Q9D1C9/6e-75/ RRP7A_MOUSE Ribosomal RNA-processing protein 7 homolog A OS=Mus musculus GN=Rrp7a PE=2 SV=1	tru:101070276/1e-169/rrp7a; ribosomal RNA processing 7 homolog A; K14545 ribosomal RNA-processing protein 7	molecular_function:GO:0003676//nucleic acid binding;
S.schlegelii_GLEAN_10023774	-5.70153	4.81574	9.97562e-06	0.000226591	gi|5579021|emb|CAB51367.1|/0/cytochrome P4501B [Pleuronectes platessa]	Q16678/0.0/ CP1B1_HUMAN Cytochrome P450 1B1 OS=Homo sapiens GN=CYP1B1 PE=1 SV=2	lcf:108886282/0.0/cytochrome P450 1B1 isoform X1; K07410 cytochrome P450 family 1 subfamily B polypeptide 1 [EC:1.14.14.1]	biological_process:GO:0055114//oxidation-reduction process;molecular_function:GO:0005506//iron ion binding;GO:0016705//oxidoreductase activity, acting on paired donors, with incorporation or reduction of molecular oxygen;GO:0016712//oxidoreductase activity, acting on paired donors, with incorporation or reduction of molecular oxygen, reduced flavin or flavoprotein as one donor, and incorporation …
S.schlegelii_GLEAN_10012415	-5.69875	4.81383	9.48377e-06	0.000217673	gi|736176010|ref|XP_010767263.1|/1.7087e-54/PREDICTED: cocaine- and amphetamine-regulated transcript protein-like [Notothenia coriiceps]	Q68RJ9/3e-17/ CART_BOVIN Cocaine- and amphetamine-regulated transcript protein OS=Bos taurus GN=CARTPT PE=3 SV=1	fab:101820844/2e-12/CARTPT; CART prepropeptide; K06236 collagen, type I, alpha	biological_process:GO:0000186//activation of MAPKK activity;GO:0001678//cellular glucose homeostasis;GO:0007186//G-protein coupled receptor signaling pathway;GO:0008343//adult feeding behavior;GO:0009267//cellular response to starvation;GO:0032099//negative regulation of appetite;cellular_component:GO:0005615//extracellular space;
S.schlegelii_GLEAN_10010825	-5.69843	4.81899	2.00501e-05	0.000434844	gi|808859797|gb|KKF11886.1|/0/Retrovirus-related Pol polyprotein LINE-1 [Larimichthys crocea]	O00370/3e-53/ LORF2_HUMAN LINE-1 retrotransposable element ORF2 protein OS=Homo sapiens PE=1 SV=1	npr:108785582/8e-33/poly [ADP-ribose] polymerase 4-like; K10798 poly [ADP-ribose] polymerase [EC:2.4.2.30]	NA
S.schlegelii_GLEAN_10011680	-5.67828	4.80168	8.38393e-06	0.000194464	gi|808882177|gb|KKF29597.1|/0/Diencephalon/mesencephalon homeobox protein 1-A [Larimichthys crocea]	Q8JI10/3e-149/ DMX1A_DANRE Diencephalon/mesencephalon homeobox protein 1-A OS=Danio rerio GN=dmbx1a PE=2 SV=1	NA	molecular_function:GO:0003677//DNA binding;
S.schlegelii_GLEAN_10023832	-5.66727	4.79514	9.55454e-06	0.00021897	gi|736196848|ref|XP_010773046.1|/0/PREDICTED: E3 ubiquitin-protein ligase TRIM41-like [Notothenia coriiceps]	Q9HCM9/3e-37/ TRI39_HUMAN E3 ubiquitin-protein ligase TRIM39 OS=Homo sapiens GN=TRIM39 PE=1 SV=2	ipu:108262895/4e-133/E3 ubiquitin-protein ligase TRIM62-like; K12030 tripartite motif-containing protein 62 [EC:2.3.2.27]	cellular_component:GO:0005622//intracellular;molecular_function:GO:0005515//protein binding;GO:0008270//zinc ion binding;
S.schlegelii_GLEAN_10019264	-5.66233	4.78998	1.13411e-05	0.000256533	gi|542247558|ref|XP_005460314.1|/5.12253e-174/PREDICTED: proto-oncogene c-Fos-like [Oreochromis niloticus]	P01101/2e-58/ FOS_MOUSE Proto-oncogene c-Fos OS=Mus musculus GN=Fos PE=1 SV=1	mze:101487601/3e-174/proto-oncogene c-Fos-like; K04379 proto-oncogene protein c-fos	biological_process:GO:0006355//regulation of transcription, DNA-templated;GO:0006357//regulation of transcription from RNA polymerase II promoter;molecular_function:GO:0003677//DNA binding;GO:0003700//sequence-specific DNA binding transcription factor activity;GO:0043565//sequence-specific DNA binding;
S.schlegelii_GLEAN_10022354	-5.66002	4.78974	7.55764e-06	0.000177714	gi|317419718|emb|CBN81754.1|/2.41259e-54/cAMP early repressor I [Dicentrarchus labrax]	P81269/7e-35/ ATF1_MOUSE Cyclic AMP-dependent transcription factor ATF-1 OS=Mus musculus GN=Atf1 PE=1 SV=1	mze:101474920/6e-48/crem; cAMP responsive element modulator; K09052 cAMP response element modulator	biological_process:GO:0006355//regulation of transcription, DNA-templated;GO:0006357//regulation of transcription from RNA polymerase II promoter;cellular_component:GO:0005634//nucleus;molecular_function:GO:0003677//DNA binding;GO:0003700//sequence-specific DNA binding transcription factor activity;GO:0043565//sequence-specific DNA binding;GO:0046982//protein heterodimerization activity;
S.schlegelii_GLEAN_10003629	-5.63772	4.77597	1.41245e-05	0.000315234	gi|734619857|ref|XP_010737750.1|/0/PREDICTED: E3 ubiquitin-protein ligase TRIM39-like [Larimichthys crocea]	P19474/2e-60/ RO52_HUMAN E3 ubiquitin-protein ligase TRIM21 OS=Homo sapiens GN=TRIM21 PE=1 SV=1	lcf:108874159/0.0/E3 ubiquitin-protein ligase TRIM39-like isoform X1; K12015 tripartite motif-containing protein 39 [EC:2.3.2.27]	molecular_function:GO:0005515//protein binding;GO:0008270//zinc ion binding;
S.schlegelii_GLEAN_10017877	-5.62786	4.76989	1.42058e-05	0.00031659	gi|808872900|gb|KKF22292.1|/3.2778e-118/Coiled-coil domain-containing protein 115 [Larimichthys crocea]	Q5EAR6/3e-57/ CC115_DANRE Coiled-coil domain-containing protein 115 OS=Danio rerio GN=ccdc115 PE=2 SV=1	bpec:110164879/2e-70/uncharacterized protein LOC110164879; K18772 C->U-editing enzyme APOBEC2 [EC:3.5.4.-]	NA
S.schlegelii_GLEAN_10023414	-5.58802	4.74583	1.61284e-05	0.000353788	gi|410922064|ref|XP_003974503.1|/7.00497e-127/PREDICTED: protein DGCR6-like [Takifugu rubripes]	O73770/1e-85/ DGCR6_CHICK Protein DGCR6 OS=Gallus gallus GN=DGCR6 PE=2 SV=1	NA	NA
S.schlegelii_GLEAN_10014936	-5.56759	4.73248	3.17436e-05	0.000653382	gi|410905971|ref|XP_003966465.1|/0/PREDICTED: GDP-Man:Man(3)GlcNAc(2)-PP-Dol alpha-1,2-mannosyltransferase [Takifugu rubripes]	Q7ZW24/0.0/ ALG11_DANRE GDP-Man:Man(3)GlcNAc(2)-PP-Dol alpha-1,2-mannosyltransferase OS=Danio rerio GN=alg11 PE=2 SV=2	tru:101079741/0.0/alg11; ALG11, alpha-1,2-mannosyltransferase; K03844 alpha-1,2-mannosyltransferase [EC:2.4.1.131]	NA
S.schlegelii_GLEAN_10008718	-5.55495	4.72551	2.8818e-05	0.000598784	gi|808878292|gb|KKF26556.1|/1.12516e-70/Tryptase-2 [Larimichthys crocea]	Q9XSM2/3e-22/ TRYT_SHEEP Tryptase-2 OS=Ovis aries PE=2 SV=1	chx:102177855/2e-21/tryptase-2; K01340 tryptase [EC:3.4.21.59]	biological_process:GO:0006508//proteolysis;molecular_function:GO:0004252//serine-type endopeptidase activity;
S.schlegelii_GLEAN_10005338	-5.54324	4.71847	2.86298e-05	0.000595678	gi|224814378|gb|ACN65410.1|/1.24111e-80/urotensin II precursor [Epinephelus coioides]	P21857/8e-40/ UTS2_PLAFE Urotensin-2 (Fragments) OS=Platichthys flesus PE=1 SV=1	lcf:108882095/3e-80/urotensin-2-like; K05248 urotensin 2	biological_process:GO:0008217//regulation of blood pressure;GO:0042312//regulation of vasodilation;cellular_component:GO:0005576//extracellular region;molecular_function:GO:0005179//hormone activity;
S.schlegelii_GLEAN_10003830	-5.53716	4.71435	2.99153e-05	0.000620743	gi|808874517|gb|KKF23591.1|/0/SAGA-associated factor 29 [Larimichthys crocea]	Q96ES7/0.0/ SGF29_HUMAN SAGA-associated factor 29 OS=Homo sapiens GN=SGF29 PE=1 SV=1	ncc:104949370/0.0/ccdc101; SAGA-associated factor 29 homolog; K11364 SAGA-associated factor 29	NA
S.schlegelii_GLEAN_10011958	-5.52762	4.70911	2.60183e-05	0.00055105	gi|734618055|ref|XP_010736753.1|/1.62028e-78/PREDICTED: DNA-directed RNA polymerases I and III subunit RPAC2 [Larimichthys crocea] &gt;gi|808866165|gb|KKF16921.1| hypothetical protein EH28_16700 [Larimichthys crocea]	NA	cfa:100686016/4e-18/POLR1D; RNA polymerase I subunit D; K03020 DNA-directed RNA polymerases I and III subunit RPAC2	NA
S.schlegelii_GLEAN_10010601	-5.50696	4.69679	2.81156e-05	0.000587368	gi|657533330|ref|XP_008273689.1|/0/PREDICTED: uncharacterized protein LOC103352807 [Stegastes partitus] &gt;gi|657533333|ref|XP_008273690.1| PREDICTED: uncharacterized protein LOC103352807 [Stegastes partitus]	NA	NA	NA
S.schlegelii_GLEAN_10003746	-5.50183	4.69464	3.26758e-05	0.000670771	gi|317418870|emb|CBN80908.1|/0/PHD finger protein 13 [Dicentrarchus labrax]	Q86YI8/2e-82/ PHF13_HUMAN PHD finger protein 13 OS=Homo sapiens GN=PHF13 PE=1 SV=2	fch:102049818/2e-27/ABCF3; ATP binding cassette subfamily F member 3; K06158 ATP-binding cassette, subfamily F, member 3	molecular_function:GO:0005515//protein binding;GO:0008270//zinc ion binding;
S.schlegelii_GLEAN_10011109	-5.46541	4.67439	7.22361e-05	0.00140049	gi|734611854|ref|XP_010733352.1|/0/PREDICTED: uncharacterized protein LOC104922264 [Larimichthys crocea]	NA	NA	NA
S.schlegelii_GLEAN_10022865	-5.44603	4.66085	5.17602e-05	0.00102674	gi|542229266|ref|XP_005453400.1|/0/PREDICTED: KH domain-containing, RNA-binding, signal transduction-associated protein 1 [Oreochromis niloticus]	Q60749/7e-115/ KHDR1_MOUSE KH domain-containing, RNA-binding, signal transduction-associated protein 1 OS=Mus musculus GN=Khdrbs1 PE=1 SV=2	lcf:108892473/0.0/KH domain-containing, RNA-binding, signal transduction-associated protein 1-like; K13198 KH domain-containing, RNA-binding, signal transduction-associated protein 1	molecular_function:GO:0003676//nucleic acid binding;GO:0003723//RNA binding;
S.schlegelii_GLEAN_10023647	-5.44078	4.65836	5.52519e-05	0.00108213	gi|808876957|gb|KKF25537.1|/0/Cyclin-O [Larimichthys crocea]	Q32NJ2/5e-71/ CCNOA_XENLA Cyclin-O protein A OS=Xenopus laevis GN=ccno-a PE=1 SV=1	lco:104923011/0.0/ccno, Cyclin-O; cyclin O; K10861 uracil-DNA glycosylase 2 [EC:3.2.2.-]	cellular_component:GO:0005634//nucleus;
S.schlegelii_GLEAN_10007218	-5.43635	4.65527	4.79087e-05	0.000967043	gi|734623263|ref|XP_010739620.1|/0/PREDICTED: radial spoke head protein 6 homolog A-like [Larimichthys crocea]	Q8BYM7/1e-151/ RSH4A_MOUSE Radial spoke head protein 4 homolog A OS=Mus musculus GN=Rsph4a PE=1 SV=2	lco:104927276/0.0/radial spoke head protein 6 homolog A-like; K19756 radial spoke head protein 4A	NA
S.schlegelii_GLEAN_10019843	-5.4331	4.65756	9.55772e-05	0.00179631	gi|836714928|gb|AKM76972.1|/0/caspase 10 [Sebastes schlegelii]	Q9JHX4/4e-80/ CASP8_RAT Caspase-8 OS=Rattus norvegicus GN=Casp8 PE=1 SV=1	lcf:108881527/0.0/caspase-8-like; K04400 caspase 10 [EC:3.4.22.63]	biological_process:GO:0006508//proteolysis;GO:0006915//apoptotic process;GO:0042981//regulation of apoptotic process;molecular_function:GO:0004197//cysteine-type endopeptidase activity;GO:0005515//protein binding;GO:0008234//cysteine-type peptidase activity;
S.schlegelii_GLEAN_10011186	-5.42083	4.64631	5.04001e-05	0.00100744	gi|657572952|ref|XP_008290115.1|/1.28281e-150/PREDICTED: probable U3 small nucleolar RNA-associated protein 11 [Stegastes partitus]	Q9Y3A2/4e-120/ UTP11_HUMAN Probable U3 small nucleolar RNA-associated protein 11 OS=Homo sapiens GN=UTP11 PE=1 SV=2	lcf:108899568/4e-153/utp11; probable U3 small nucleolar RNA-associated protein 11; K14769 U3 small nucleolar RNA-associated protein 11	biological_process:GO:0006364//rRNA processing;cellular_component:GO:0032040//small-subunit processome;
S.schlegelii_GLEAN_10021513	-5.41543	4.64312	5.07633e-05	0.00101099	gi|808882475|gb|KKF29859.1|/0/P43 5S RNA-binding protein [Larimichthys crocea]	P25066/3e-85/ P43_XENBO P43 5S RNA-binding protein OS=Xenopus borealis PE=2 SV=1	lcf:108872727/0.0/P43 5S RNA-binding protein-like; K09191 general transcription factor IIIA	molecular_function:GO:0046872//metal ion binding;
S.schlegelii_GLEAN_10020652	-5.40551	4.63762	0.000104053	0.00191575	gi|966704251|gb|KTG36492.1|/0/hypothetical protein cypCar_00006374 [Cyprinus carpio]	Q155U0/0.0/ VPS51_DANRE Vacuolar protein sorting-associated protein 51 homolog OS=Danio rerio GN=vps51 PE=2 SV=1	nle:100603354/0.0/VPS51; VPS51, GARP complex subunit; K20296 vacuolar protein sorting-associated protein 51	NA
S.schlegelii_GLEAN_10023154	-5.39938	4.63391	9.49682e-05	0.00178927	gi|657580997|ref|XP_008294494.1|/8.94959e-60/PREDICTED: noncompact myelin-associated protein [Stegastes partitus]	NA	NA	NA
S.schlegelii_GLEAN_10007556	-5.39561	4.63155	9.53095e-05	0.00179348	gi|808857378|gb|KKF09975.1|/0/Tenascin [Larimichthys crocea]	P10039/1e-134/ TENA_CHICK Tenascin OS=Gallus gallus GN=TNC PE=1 SV=2	ncc:104965572/0.0/tenascin-like; K06252 tenascin	molecular_function:GO:0005515//protein binding;
S.schlegelii_GLEAN_10006698	-5.38561	4.6265	0.000106662	0.00195208	gi|657584064|ref|XP_008296169.1|/6.67376e-46/PREDICTED: unique cartilage matrix-associated protein-like [Stegastes partitus]	B9TQX3/8e-42/ UCMA_DICLA Unique cartilage matrix-associated protein OS=Dicentrarchus labrax GN=ucma PE=2 SV=1	NA	biological_process:GO:0045667//regulation of osteoblast differentiation;
S.schlegelii_GLEAN_10016970	-5.38423	4.62573	0.000109422	0.00199072	gi|808887003|gb|KKF33488.1|/0/UPF0676 protein [Larimichthys crocea]	Q7LL04/5e-38/ YQK1_SCHPO UPF0676 protein C1494.01 OS=Schizosaccharomyces pombe (strain 972 / ATCC 24843) GN=SPCC1494.01 PE=3 SV=2	ncc:104967341/5e-23/urb2; unhealthy ribosome biogenesis protein 2 homolog; K14862 nucleolar pre-ribosomal-associated protein 2	biological_process:GO:0055114//oxidation-reduction process;molecular_function:GO:0005506//iron ion binding;GO:0016491//oxidoreductase activity;
S.schlegelii_GLEAN_10015655	-5.37859	4.62258	0.000114449	0.00206412	gi|657599303|ref|XP_008304458.1|/0/PREDICTED: transmembrane protein 183A isoform X1 [Stegastes partitus] &gt;gi|657599668|ref|XP_008304656.1| PREDICTED: transmembrane protein 183A-like isoform X1 [Stegastes partitus]	Q68FS7/3e-157/ TM183_RAT Transmembrane protein 183 OS=Rattus norvegicus GN=Tmem183 PE=2 SV=1	sko:102810292/3e-55/AP-2 complex subunit alpha-1-like; K11824 AP-2 complex subunit alpha	NA
S.schlegelii_GLEAN_10019157	-5.37471	4.61969	9.72085e-05	0.00181849	gi|348541651|ref|XP_003458300.1|/4.58778e-172/PREDICTED: 39S ribosomal protein L19, mitochondrial [Oreochromis niloticus]	Q2HJI0/5e-124/ RM19_BOVIN 39S ribosomal protein L19, mitochondrial OS=Bos taurus GN=MRPL19 PE=1 SV=1	mze:101477244/4e-172/mrpl19; mitochondrial ribosomal protein L19; K02884 large subunit ribosomal protein L19	biological_process:GO:0006412//translation;cellular_component:GO:0005622//intracellular;GO:0005840//ribosome;molecular_function:GO:0003735//structural constituent of ribosome;
S.schlegelii_GLEAN_10007562	-5.3734	4.61897	9.35524e-05	0.00177784	gi|734621964|ref|XP_010738905.1|/0/PREDICTED: sodium-dependent neutral amino acid transporter B(0)AT3-like [Larimichthys crocea]	O88576/0.0/ S6A18_MOUSE Sodium-dependent neutral amino acid transporter B(0)AT3 OS=Mus musculus GN=Slc6a18 PE=1 SV=1	lcf:108891105/0.0/sodium-dependent neutral amino acid transporter B(0)AT3-like; K05048 solute carrier family 6 (neurotransmitter transporter, amino acid/orphan) member 15/16/17/18/20	biological_process:GO:0006836//neurotransmitter transport;cellular_component:GO:0005887//integral component of plasma membrane;GO:0016020//membrane;GO:0016021//integral component of membrane;molecular_function:GO:0005328//neurotransmitter:sodium symporter activity;
S.schlegelii_GLEAN_10021421	-5.37058	4.61843	0.000122216	0.00219746	gi|734603333|ref|XP_010728670.1|/7.3211e-174/PREDICTED: uncharacterized protein LOC104918573 isoform X1 [Larimichthys crocea]	Q9CYC5/3e-17/ DSN1_MOUSE Kinetochore-associated protein DSN1 homolog OS=Mus musculus GN=Dsn1 PE=1 SV=1	lco:104918573/1e-174/Kinetochore-associated protein DSN1; K11544 kinetochore-associated protein DSN1	NA
S.schlegelii_GLEAN_10015544	-5.36244	4.6126	9.58319e-05	0.0017989	gi|229367022|gb|ACQ58491.1|/0/Lathosterol oxidase [Anoplopoma fimbria]	O88822/4e-131/ SC5D_MOUSE Lathosterol oxidase OS=Mus musculus GN=Sc5d PE=2 SV=2	lco:104938430/0.0/lathosterol oxidase-like; K00227 Delta7-sterol 5-desaturase [EC:1.14.19.20]	biological_process:GO:0006633//fatty acid biosynthetic process;GO:0055114//oxidation-reduction process;molecular_function:GO:0005506//iron ion binding;GO:0016491//oxidoreductase activity;
S.schlegelii_GLEAN_10017891	-5.35657	4.61191	0.00014777	0.00264454	gi|657563685|ref|XP_008285156.1|/9.3438e-161/PREDICTED: heterogeneous nuclear ribonucleoprotein A1 [Stegastes partitus]	P09651/1e-120/ ROA1_HUMAN Heterogeneous nuclear ribonucleoprotein A1 OS=Homo sapiens GN=HNRNPA1 PE=1 SV=5	ola:101174914/4e-153/heterogeneous nuclear ribonucleoprotein A1; K12741 heterogeneous nuclear ribonucleoprotein A1/A3	molecular_function:GO:0003676//nucleic acid binding;
S.schlegelii_GLEAN_10016029	-5.35227	4.60677	9.82208e-05	0.00183254	gi|498977166|ref|XP_004549047.1|/2.11271e-170/PREDICTED: nurim [Maylandia zebra]	Q1L911/8e-123/ NRM_DANRE Nurim OS=Danio rerio GN=nrm PE=3 SV=1	NA	NA
S.schlegelii_GLEAN_10010868	-5.35209	4.60786	0.000113321	0.00204951	gi|657552758|ref|XP_008280764.1|/2.75351e-179/PREDICTED: protein CASP isoform X3 [Stegastes partitus]	Q13948/2e-133/ CASP_HUMAN Protein CASP OS=Homo sapiens GN=CUX1 PE=1 SV=2	lco:104931253/9e-177/cux1; cut like homeobox 1; K09313 homeobox protein cut-like	biological_process:GO:0006891//intra-Golgi vesicle-mediated transport;cellular_component:GO:0030173//integral component of Golgi membrane;
S.schlegelii_GLEAN_10016490	-5.3408	4.60042	9.42943e-05	0.00178311	gi|657566195|ref|XP_008286429.1|/0/PREDICTED: tRNA-dihydrouridine(20a/20b) synthase [NAD(P)+]-like [Stegastes partitus]	O95620/7e-175/ DUS4L_HUMAN tRNA-dihydrouridine(20a/20b) synthase [NAD(P)+]-like OS=Homo sapiens GN=DUS4L PE=2 SV=2	lcf:108888402/0.0/dus4l; tRNA-dihydrouridine(20a/20b) synthase [NAD(P)+]-like; K05545 tRNA-dihydrouridine synthase 4 [EC:1.3.1.90]	biological_process:GO:0008033//tRNA processing;GO:0055114//oxidation-reduction process;molecular_function:GO:0017150//tRNA dihydrouridine synthase activity;GO:0050660//flavin adenine dinucleotide binding;
S.schlegelii_GLEAN_10015497	-5.33887	4.59924	8.95784e-05	0.0017215	gi|808863012|gb|KKF14444.1|/7.46645e-158/Coiled-coil domain-containing protein 113 [Larimichthys crocea]	Q5XJN6/7e-43/ CC113_DANRE Coiled-coil domain-containing protein 113 OS=Danio rerio GN=ccdc113 PE=2 SV=1	NA	NA
S.schlegelii_GLEAN_10016300	-5.32002	4.58905	0.000103834	0.00191402	gi|734649512|ref|XP_010754045.1|/0/PREDICTED: extracellular calcium-sensing receptor-like [Larimichthys crocea]	O62714/0.0/ CASR_PIG Extracellular calcium-sensing receptor OS=Sus scrofa GN=CASR PE=2 SV=3	lcf:108899751/0.0/LOW QUALITY PROTEIN: extracellular calcium-sensing receptor-like; K04612 calcium-sensing receptor	biological_process:GO:0007186//G-protein coupled receptor signaling pathway;cellular_component:GO:0016021//integral component of membrane;molecular_function:GO:0004930//G-protein coupled receptor activity;
S.schlegelii_GLEAN_10016865	-5.31806	4.58842	0.000206551	0.00354765	gi|734603028|ref|XP_010728499.1|/0/PREDICTED: galectin-3-binding protein A-like [Larimichthys crocea] &gt;gi|734603030|ref|XP_010728501.1| PREDICTED: galectin-3-binding protein A-like [Larimichthys crocea]	Q6NY73/4e-83/ L3BPB_DANRE Galectin-3-binding protein B OS=Danio rerio GN=lgals3bpb PE=2 SV=1	mze:101465271/0.0/galectin-3-binding protein B-like; K17300 galectin-3-binding protein	cellular_component:GO:0016020//membrane;molecular_function:GO:0005044//scavenger receptor activity;GO:0005515//protein binding;
S.schlegelii_GLEAN_10001129	-5.26998	4.5607	0.000194187	0.00335026	gi|736216139|ref|XP_010778605.1|/6.82083e-59/PREDICTED: egl nine homolog 3-like, partial [Notothenia coriiceps]	Q62630/4e-36/ EGLN3_RAT Egl nine homolog 3 OS=Rattus norvegicus GN=Egln3 PE=1 SV=2	ncc:104953366/1e-59/egl nine homolog 3-like; K09592 hypoxia-inducible factor prolyl hydroxylase [EC:1.14.11.29]	NA
S.schlegelii_GLEAN_10002883	-5.2694	4.56102	0.000221858	0.00378094	gi|808859760|gb|KKF11853.1|/1.91925e-136/Dickkopf-related protein 2 [Larimichthys crocea]	Q9QYZ8/7e-60/ DKK2_MOUSE Dickkopf-related protein 2 OS=Mus musculus GN=Dkk2 PE=1 SV=2	lcf:108892256/3e-131/dickkopf-related protein 2-like; K02165 dickkopf	biological_process:GO:0007275//multicellular organismal development;GO:0030178//negative regulation of Wnt signaling pathway;cellular_component:GO:0005576//extracellular region;
S.schlegelii_GLEAN_10019423	-5.26064	4.55589	0.000223893	0.0038114	gi|554813802|ref|XP_005917729.1|/0/PREDICTED: leucine-rich repeat and fibronectin type-III domain-containing protein 5-like isoform X1 [Haplochromis burtoni] &gt;gi|554813804|ref|XP_005917730.1| PREDICTED: leucine-rich repeat and fibronectin type-III domain-containing protein 5-like isoform X1 [Haplochromis burtoni]	Q8BXA0/0.0/ LRFN5_MOUSE Leucine-rich repeat and fibronectin type-III domain-containing protein 5 OS=Mus musculus GN=Lrfn5 PE=1 SV=1	lcf:108896920/0.0/leucine-rich repeat and fibronectin type-III domain-containing protein 5-like; K16358 leucine-rich repeat and fibronectin type-III domain-containing protein 5	molecular_function:GO:0005515//protein binding;
S.schlegelii_GLEAN_10011551	-5.2584	4.55393	0.000188889	0.00328098	gi|799541263|gb|AKA66305.1|/0/complement component 8 alpha [Siniperca chuatsi]	P98136/8e-163/ CO8A_RABIT Complement component C8 alpha chain OS=Oryctolagus cuniculus GN=C8A PE=1 SV=1	lco:104932765/0.0/c8a; complement C8 alpha chain; K03997 complement component 8 subunit alpha	biological_process:GO:0006955//immune response;cellular_component:GO:0005579//membrane attack complex;molecular_function:GO:0005515//protein binding;
S.schlegelii_GLEAN_10018910	-5.22327	4.53499	0.000174912	0.00310729	gi|734618912|ref|XP_010737231.1|/0/PREDICTED: endoplasmic reticulum-Golgi intermediate compartment protein 2-like [Larimichthys crocea]	Q7T2D4/0.0/ ERGI2_DANRE Endoplasmic reticulum-Golgi intermediate compartment protein 2 OS=Danio rerio GN=ergic2 PE=2 SV=1	lcf:108886205/0.0/endoplasmic reticulum-Golgi intermediate compartment protein 2-like; K20366 endoplasmic reticulum-Golgi intermediate compartment protein 2	NA
S.schlegelii_GLEAN_10016322	-5.22163	4.53762	0.000505855	0.00810794	gi|736183090|ref|XP_010769260.1|/0/PREDICTED: isobutyryl-CoA dehydrogenase, mitochondrial [Notothenia coriiceps]	Q9UKU7/0.0/ ACAD8_HUMAN Isobutyryl-CoA dehydrogenase, mitochondrial OS=Homo sapiens GN=ACAD8 PE=1 SV=1	lcf:108899779/0.0/acad8; isobutyryl-CoA dehydrogenase, mitochondrial; K11538 isobutyryl-CoA dehydrogenase [EC:1.3.99.-]	biological_process:GO:0008152//metabolic process;GO:0055114//oxidation-reduction process;molecular_function:GO:0003995//acyl-CoA dehydrogenase activity;GO:0016627//oxidoreductase activity, acting on the CH-CH group of donors;GO:0050660//flavin adenine dinucleotide binding;
S.schlegelii_GLEAN_10015933	-5.21464	4.5301	0.000191091	0.00330801	gi|734625001|ref|XP_010740579.1|/0/PREDICTED: tektin-2 [Larimichthys crocea]	Q9UIF3/4e-129/ TEKT2_HUMAN Tektin-2 OS=Homo sapiens GN=TEKT2 PE=1 SV=1	lco:104928060/0.0/tekt2, Tektin-2; tektin 2; K18629 tektin-2	NA
S.schlegelii_GLEAN_10007272	-5.17144	4.50686	0.000340683	0.00569226	gi|734646246|ref|XP_010752253.1|/2.22555e-150/PREDICTED: NADH dehydrogenase [ubiquinone] iron-sulfur protein 8, mitochondrial-like [Larimichthys crocea]	Q60HE3/2e-121/ NDUS8_MACFA NADH dehydrogenase [ubiquinone] iron-sulfur protein 8, mitochondrial OS=Macaca fascicularis GN=NDUFS8 PE=2 SV=1	lco:104937669/8e-151/NADH dehydrogenase [ubiquinone] iron-sulfur protein 8, mitochondrial-like; K03941 NADH dehydrogenase (ubiquinone) Fe-S protein 8 [EC:1.6.5.3 1.6.99.3]	NA
S.schlegelii_GLEAN_10000513	-5.16687	4.5054	0.000392761	0.00634825	gi|808871370|gb|KKF21085.1|/0/Keratin, type I cytoskeletal 13 [Larimichthys crocea]	Q90303/9e-177/ K1C1_CARAU Keratin, type I cytoskeletal 50 kDa OS=Carassius auratus PE=2 SV=1	lco:104938914/0.0/keratin, type I cytoskeletal 13-like; K07604 type I keratin, acidic	cellular_component:GO:0005882//intermediate filament;molecular_function:GO:0005198//structural molecule activity;
S.schlegelii_GLEAN_10019981	-5.16385	4.50286	0.00038749	0.00626966	gi|736262553|ref|XP_010790188.1|/0/PREDICTED: DNA excision repair protein ERCC-1 [Notothenia coriiceps]	P07992/4e-117/ ERCC1_HUMAN DNA excision repair protein ERCC-1 OS=Homo sapiens GN=ERCC1 PE=1 SV=1	ncc:104963312/0.0/ercc1; DNA excision repair protein ERCC-1; K10849 DNA excision repair protein ERCC-1	biological_process:GO:0006281//DNA repair;cellular_component:GO:0005634//nucleus;molecular_function:GO:0003684//damaged DNA binding;GO:0004519//endonuclease activity;
S.schlegelii_GLEAN_10003571	-5.13228	4.48591	0.000328067	0.00554177	gi|657589737|ref|XP_008299273.1|/0/PREDICTED: uncharacterized protein LOC103371657 [Stegastes partitus]	NA	NA	NA
S.schlegelii_GLEAN_10018693	-5.12047	4.47968	0.000342679	0.00571317	gi|808882819|gb|KKF30136.1|/3.06255e-77/Leptin receptor overlapping transcript-like 1 [Larimichthys crocea]	Q5RDE9/2e-71/ LERL1_PONAB Leptin receptor overlapping transcript-like 1 OS=Pongo abelii GN=LEPROTL1 PE=2 SV=1	NA	NA
S.schlegelii_GLEAN_10009589	-5.11762	4.47821	0.000326354	0.00552621	gi|734627092|ref|XP_010741717.1|/1.26577e-139/PREDICTED: tumor necrosis factor receptor superfamily member 1A [Larimichthys crocea] &gt;gi|734627094|ref|XP_010741718.1| PREDICTED: tumor necrosis factor receptor superfamily member 1A [Larimichthys crocea]	P22934/1e-30/ TNR1A_RAT Tumor necrosis factor receptor superfamily member 1A OS=Rattus norvegicus GN=Tnfrsf1a PE=2 SV=2	lcf:108887354/1e-146/tnfrsf1a; tumor necrosis factor receptor superfamily member 1A isoform X1; K03158 tumor necrosis factor receptor superfamily member 1A	biological_process:GO:0007165//signal transduction;molecular_function:GO:0005515//protein binding;
S.schlegelii_GLEAN_10005196	-5.11745	4.47808	0.000334931	0.00561448	gi|734610858|ref|XP_010732804.1|/4.0462e-117/PREDICTED: podocin [Larimichthys crocea]	Q8K4G9/1e-47/ PODO_RAT Podocin OS=Rattus norvegicus GN=Nphs2 PE=1 SV=2	lco:104921841/8e-114/nphs2; NPHS2, podocin; K18268 podocin	biological_process:GO:0007588//excretion;GO:0031532//actin cytoskeleton reorganization;cellular_component:GO:0005887//integral component of plasma membrane;GO:0016020//membrane;
S.schlegelii_GLEAN_10010722	-5.09275	4.4651	0.0006549	0.0101125	gi|734610647|ref|XP_010732693.1|/0/PREDICTED: carboxypeptidase O [Larimichthys crocea]	B8JLQ9/2e-166/ CBPO_DANRE Carboxypeptidase O OS=Danio rerio GN=cpo PE=1 SV=1	pbi:103063807/8e-103/mast cell carboxypeptidase A-like; K08780 carboxypeptidase A3 [EC:3.4.17.1]	biological_process:GO:0006508//proteolysis;molecular_function:GO:0004181//metallocarboxypeptidase activity;GO:0008270//zinc ion binding;
S.schlegelii_GLEAN_10002964	-5.0828	4.45989	0.000697191	0.0104443	gi|831559329|ref|XP_012731009.1|/3.60035e-91/PREDICTED: gametocyte-specific factor 1-like [Fundulus heteroclitus]	Q4R8M9/2e-43/ GTSF1_MACFA Gametocyte-specific factor 1 OS=Macaca fascicularis GN=GTSF1 PE=2 SV=1	ame:413757/5e-08/Pros29; uncharacterized LOC413757; K02728 20S proteasome subunit alpha 3 [EC:3.4.25.1]	biological_process:GO:0007283//spermatogenesis;
S.schlegelii_GLEAN_10005682	-5.08077	4.4591	0.000701533	0.0104767	gi|229366216|gb|ACQ58088.1|/1.82088e-134/Ras-related protein Rap-1b precursor [Anoplopoma fimbria] &gt;gi|808887430|gb|KKF33791.1| Ras-related protein Rap-1b [Larimichthys crocea]	Q640R7/4e-128/ RAP1B_XENTR Ras-related protein Rap-1b OS=Xenopus tropicalis GN=rap1b PE=2 SV=1	mze:101483640/3e-135/ras-related protein Rap-1A; K04353 Ras-related protein Rap-1A	biological_process:GO:0006886//intracellular protein transport;GO:0006913//nucleocytoplasmic transport;GO:0007165//signal transduction;GO:0007264//small GTPase mediated signal transduction;GO:0015031//protein transport;cellular_component:GO:0005622//intracellular;GO:0016020//membrane;molecular_function:GO:0003924//GTPase activity;GO:0005525//GTP binding;
S.schlegelii_GLEAN_10020720	-5.07601	4.45625	0.000681776	0.0102908	gi|736185068|ref|XP_010769816.1|/0/PREDICTED: plastin-3 [Notothenia coriiceps]	Q99K51/0.0/ PLST_MOUSE Plastin-3 OS=Mus musculus GN=Pls3 PE=1 SV=3	ncc:104945798/0.0/pls3; plastin-3; K17336 plastin-3	molecular_function:GO:0005509//calcium ion binding;GO:0005515//protein binding;
S.schlegelii_GLEAN_10016066	-5.07353	4.45676	0.000794881	0.0117813	gi|734601601|ref|XP_010727713.1|/0/PREDICTED: serine beta-lactamase-like protein LACTB, mitochondrial [Larimichthys crocea]	P83095/0.0/ LACTB_BOVIN Serine beta-lactamase-like protein LACTB, mitochondrial OS=Bos taurus GN=LACTB PE=1 SV=2	lcf:108875336/0.0/lactb; serine beta-lactamase-like protein LACTB, mitochondrial isoform X1; K17382 serine beta-lactamase-like protein LACTB, mitochondrial	NA
S.schlegelii_GLEAN_10008729	-5.06261	4.45176	0.00086813	0.0128175	gi|742216937|ref|XP_010898091.1|/0/PREDICTED: primary amine oxidase, liver isozyme [Esox lucius]	Q9TTK6/0.0/ AOC3_BOVIN Membrane primary amine oxidase OS=Bos taurus GN=AOC3 PE=2 SV=3	els:105027621/0.0/primary amine oxidase, liver isozyme; K00276 primary-amine oxidase [EC:1.4.3.21]	biological_process:GO:0009308//amine metabolic process;GO:0055114//oxidation-reduction process;molecular_function:GO:0005507//copper ion binding;GO:0008131//primary amine oxidase activity;GO:0048038//quinone binding;
S.schlegelii_GLEAN_10009810	-5.06113	4.44836	0.000708018	0.0105447	gi|410897277|ref|XP_003962125.1|/7.93622e-179/PREDICTED: protein lifeguard 3-like [Takifugu rubripes]	Q969X1/2e-87/ LFG3_HUMAN Protein lifeguard 3 OS=Homo sapiens GN=TMBIM1 PE=1 SV=2	lcf:108886896/0.0/protein lifeguard 3-like isoform X1; K06890 uncharacterized protein	NA
S.schlegelii_GLEAN_10022313	-5.05576	4.4458	0.000641284	0.0100787	gi|808878567|gb|KKF26794.1|/0/Aquaporin-4, partial [Larimichthys crocea]	P55088/8e-150/ AQP4_MOUSE Aquaporin-4 OS=Mus musculus GN=Aqp4 PE=1 SV=2	ncc:104957666/0.0/aqp4; aquaporin-4 isoform X1; K09866 aquaporin-4	biological_process:GO:0006810//transport;cellular_component:GO:0016020//membrane;molecular_function:GO:0005215//transporter activity;
S.schlegelii_GLEAN_10006368	-5.05492	4.44545	0.00065834	0.0101125	gi|657522304|ref|XP_008300475.1|/1.32743e-159/PREDICTED: ras-related protein Rab-3A-like [Stegastes partitus]	P11023/1e-148/ RAB3A_BOVIN Ras-related protein Rab-3A OS=Bos taurus GN=RAB3A PE=1 SV=3	hcq:109527151/1e-160/ras-related protein Rab-3A-like; K07882 Ras-related protein Rab-3A	biological_process:GO:0006886//intracellular protein transport;GO:0006913//nucleocytoplasmic transport;GO:0007165//signal transduction;GO:0007264//small GTPase mediated signal transduction;GO:0015031//protein transport;cellular_component:GO:0005622//intracellular;GO:0016020//membrane;molecular_function:GO:0003924//GTPase activity;GO:0005525//GTP binding;
S.schlegelii_GLEAN_10010126	-5.05446	4.44522	0.000683547	0.0102908	gi|657582814|ref|XP_008295483.1|/0/PREDICTED: dual specificity protein phosphatase 7-like [Stegastes partitus]	Q16829/0.0/ DUS7_HUMAN Dual specificity protein phosphatase 7 OS=Homo sapiens GN=DUSP7 PE=1 SV=4	lcf:108900200/0.0/dual specificity protein phosphatase 7-like; K04459 dual specificity MAP kinase phosphatase [EC:3.1.3.16 3.1.3.48]	biological_process:GO:0006470//protein dephosphorylation;GO:0016311//dephosphorylation;molecular_function:GO:0008138//protein tyrosine/serine/threonine phosphatase activity;GO:0016791//phosphatase activity;GO:0017017//MAP kinase tyrosine/serine/threonine phosphatase activity;
S.schlegelii_GLEAN_10005966	-5.05036	4.44307	0.000648789	0.0101085	gi|657554634|ref|XP_008281789.1|/8.1495e-161/PREDICTED: interleukin-2 receptor subunit beta [Stegastes partitus]	P16297/2e-15/ IL2RB_MOUSE Interleukin-2 receptor subunit beta OS=Mus musculus GN=Il2rb PE=2 SV=1	lcf:108877635/2e-169/il2rb; LOW QUALITY PROTEIN: interleukin-2 receptor subunit beta; K05069 interleukin 2 receptor beta	molecular_function:GO:0005515//protein binding;
S.schlegelii_GLEAN_10003667	-5.02329	4.4297	0.00080475	0.011916	gi|348503614|ref|XP_003439359.1|/2.56189e-145/PREDICTED: ER membrane protein complex subunit 9 [Oreochromis niloticus]	Q9Y3B6/4e-78/ EMC9_HUMAN ER membrane protein complex subunit 9 OS=Homo sapiens GN=EMC9 PE=1 SV=3	oaa:100073774/5e-25/proteasome activator complex subunit 2-like; K06697 proteasome activator subunit 2 (PA28 beta)	NA
S.schlegelii_GLEAN_10014009	-5.01671	4.42574	0.000633565	0.0100664	gi|657531985|ref|XP_008303309.1|/0/PREDICTED: sodium-dependent neutral amino acid transporter B(0)AT2-like [Stegastes partitus]	Q9H2J7/0.0/ S6A15_HUMAN Sodium-dependent neutral amino acid transporter B(0)AT2 OS=Homo sapiens GN=SLC6A15 PE=1 SV=1	lcf:108881004/0.0/LOW QUALITY PROTEIN: sodium-dependent neutral amino acid transporter B(0)AT2-like; K05048 solute carrier family 6 (neurotransmitter transporter, amino acid/orphan) member 15/16/17/18/20	biological_process:GO:0006836//neurotransmitter transport;cellular_component:GO:0016021//integral component of membrane;molecular_function:GO:0005328//neurotransmitter:sodium symporter activity;
S.schlegelii_GLEAN_10006702	-5.01414	4.42446	0.000662476	0.010127	gi|808862955|gb|KKF14387.1|/0/Host cell factor 2 [Larimichthys crocea]	Q9Y5Z7/0.0/ HCFC2_HUMAN Host cell factor 2 OS=Homo sapiens GN=HCFC2 PE=1 SV=1	lcf:108874306/0.0/host cell factor 2-like isoform X1; K14966 host cell factor	molecular_function:GO:0005515//protein binding;
S.schlegelii_GLEAN_10005126	-5.00631	4.423	0.000888067	0.0130992	gi|736300746|ref|XP_010793013.1|/0/PREDICTED: osmotic avoidance abnormal protein 3-like isoform X1 [Notothenia coriiceps]	Q9GYZ0/8e-16/ KIF15_STRPU Kinesin-like protein KIF15 OS=Strongylocentrotus purpuratus GN=KIF15 PE=1 SV=1	ncc:104965705/0.0/osmotic avoidance abnormal protein 3-like isoform X1; K10394 kinesin family member 3A	biological_process:GO:0007018//microtubule-based movement;cellular_component:GO:0005871//kinesin complex;molecular_function:GO:0003777//microtubule motor activity;GO:0005524//ATP binding;GO:0008017//microtubule binding;
S.schlegelii_GLEAN_10001662	-4.98428	4.40931	0.00125	0.0175567	gi|499006460|ref|XP_004556232.1|/0/PREDICTED: UDP-glucuronosyltransferase 2A1-like isoform X1 [Maylandia zebra]	Q9Y4X1/2e-173/ UD2A1_HUMAN UDP-glucuronosyltransferase 2A1 OS=Homo sapiens GN=UGT2A1 PE=1 SV=2	lcf:108874615/0.0/LOW QUALITY PROTEIN: UDP-glucuronosyltransferase 2A1-like; K00699 glucuronosyltransferase [EC:2.4.1.17]	biological_process:GO:0008152//metabolic process;molecular_function:GO:0016758//transferase activity, transferring hexosyl groups;
S.schlegelii_GLEAN_10007007	-4.97206	4.40297	0.00128783	0.0177192	gi|657783298|ref|XP_008319114.1|/2.39869e-138/PREDICTED: rho-related GTP-binding protein RhoC-like [Cynoglossus semilaevis]	Q6DHE8/3e-136/ RHOAD_DANRE Rho-related GTP-binding protein RhoA-D OS=Danio rerio GN=rhoad PE=1 SV=1	csem:103386563/4e-139/rho-related GTP-binding protein RhoA-D; K04513 Ras homolog gene family, member A	biological_process:GO:0006886//intracellular protein transport;GO:0006913//nucleocytoplasmic transport;GO:0007165//signal transduction;GO:0007264//small GTPase mediated signal transduction;GO:0015031//protein transport;cellular_component:GO:0005622//intracellular;GO:0016020//membrane;molecular_function:GO:0003924//GTPase activity;GO:0005525//GTP binding;
S.schlegelii_GLEAN_10004975	-4.96414	4.39914	0.0012284	0.0175567	gi|543890924|gb|AGV76799.1|/4.73779e-83/NADH dehydrogenase [ubiquinone] iron-sulfur protein 6 [Sparus aurata]	Q0MQH5/6e-54/ NDUS6_PONPY NADH dehydrogenase [ubiquinone] iron-sulfur protein 6, mitochondrial OS=Pongo pygmaeus GN=NDUFS6 PE=2 SV=1	lcf:108900427/1e-82/ndufs6; NADH dehydrogenase [ubiquinone] iron-sulfur protein 6, mitochondrial; K03939 NADH dehydrogenase (ubiquinone) Fe-S protein 6	NA
S.schlegelii_GLEAN_10014926	-4.96305	4.39862	0.00124225	0.0175567	gi|734640578|ref|XP_010749135.1|/0/PREDICTED: integral membrane protein GPR180 [Larimichthys crocea]	Q86V85/2e-157/ GP180_HUMAN Integral membrane protein GPR180 OS=Homo sapiens GN=GPR180 PE=2 SV=1	ncc:104962295/6e-120/tgds; dTDP-D-glucose 4,6-dehydratase; K01710 dTDP-glucose 4,6-dehydratase [EC:4.2.1.46]	biological_process:GO:0007186//G-protein coupled receptor signaling pathway;GO:0019236//response to pheromone;
S.schlegelii_GLEAN_10004366	-4.94968	4.39192	0.00122971	0.0175567	gi|47214386|emb|CAG00867.1|/7.8472e-97/unnamed protein product [Tetraodon nigroviridis]	Q9UL19/2e-10/ HRSL4_HUMAN Retinoic acid receptor responder protein 3 OS=Homo sapiens GN=RARRES3 PE=1 SV=1	sgh:107571752/2e-13/retinoic acid receptor responder protein 3-like; K16817 HRAS-like suppressor 3 [EC:3.1.1.32 3.1.1.4]	NA
S.schlegelii_GLEAN_10022530	-4.94689	4.39056	0.00125941	0.0175608	gi|584018013|ref|XP_006803733.1|/0/PREDICTED: magnesium transporter protein 1-like isoform X2 [Neolamprologus brichardi]	Q7ZV50/0.0/ MAGT1_DANRE Magnesium transporter protein 1 OS=Danio rerio GN=magt1 PE=1 SV=1	lcf:108875493/0.0/magt1; magnesium transporter protein 1; K19478 magnesium transporter 1	biological_process:GO:0045454//cell redox homeostasis;
S.schlegelii_GLEAN_10010072	-4.94477	4.38961	0.00127998	0.017656	gi|736171887|ref|XP_010766099.1|/0/PREDICTED: SAM pointed domain-containing Ets transcription factor isoform X1 [Notothenia coriiceps]	Q9WTP3/4e-110/ SPDEF_MOUSE SAM pointed domain-containing Ets transcription factor OS=Mus musculus GN=Spdef PE=2 SV=1	lcf:108882106/0.0/spdef; SAM pointed domain-containing Ets transcription factor; K09442 SAM pointed domain-containing ETS transcription factor	biological_process:GO:0006355//regulation of transcription, DNA-templated;cellular_component:GO:0005634//nucleus;molecular_function:GO:0003700//sequence-specific DNA binding transcription factor activity;GO:0043565//sequence-specific DNA binding;
S.schlegelii_GLEAN_10010757	-4.93992	4.38707	0.00124213	0.0175567	gi|348518115|ref|XP_003446577.1|/0/PREDICTED: nuclear receptor subfamily 4 group A member 2-like [Oreochromis niloticus] &gt;gi|542226431|ref|XP_005452334.1| PREDICTED: nuclear receptor subfamily 4 group A member 2-like [Oreochromis niloticus]	Q08E53/0.0/ NR4A2_BOVIN Nuclear receptor subfamily 4 group A member 2 OS=Bos taurus GN=NR4A2 PE=2 SV=1	mze:101487266/0.0/nuclear receptor subfamily 4 group A member 2-like; K08558 nuclear receptor subfamily 4 group A member 2	biological_process:GO:0006355//regulation of transcription, DNA-templated;GO:0043401//steroid hormone mediated signaling pathway;cellular_component:GO:0005634//nucleus;molecular_function:GO:0003677//DNA binding;GO:0003700//sequence-specific DNA binding transcription factor activity;GO:0003707//steroid hormone receptor activity;GO:0008270//zinc ion binding;GO:0043565//sequence-specific DNA binding;
S.schlegelii_GLEAN_10014289	-4.9387	4.38645	0.00125047	0.0175567	gi|974099242|ref|XP_015248258.1|/0/PREDICTED: cleft lip and palate transmembrane protein 1-like protein [Cyprinodon variegatus]	Q6DHU1/0.0/ CLP1L_DANRE Cleft lip and palate transmembrane protein 1-like protein OS=Danio rerio GN=clptm1l PE=2 SV=1	nai:NECAME_12414/3e-12/ribonuclease HII; K10743 ribonuclease H2 subunit A [EC:3.1.26.4]	biological_process:GO:0006915//apoptotic process;cellular_component:GO:0016020//membrane;GO:0016021//integral component of membrane;
S.schlegelii_GLEAN_10008992	-4.93154	4.383	0.00129161	0.0177553	gi|808856916|gb|KKF09561.1|/5.97007e-113/Basic leucine zipper transcriptional factor ATF-like 3 [Larimichthys crocea]	P97876/2e-17/ BATF3_RAT Basic leucine zipper transcriptional factor ATF-like 3 OS=Rattus norvegicus GN=Batf3 PE=1 SV=1	ipu:108267540/2e-22/batf2; basic leucine zipper ATF-like transcription factor 2; K09034 ATF-like basic leucine zipper transcriptional factor	biological_process:GO:0006355//regulation of transcription, DNA-templated;GO:0006357//regulation of transcription from RNA polymerase II promoter;molecular_function:GO:0003677//DNA binding;GO:0003700//sequence-specific DNA binding transcription factor activity;GO:0043565//sequence-specific DNA binding;
S.schlegelii_GLEAN_10002640	-4.9308	4.38247	0.00123234	0.0175567	gi|401663962|dbj|BAM36362.1|/0/coagulin factor II [Oplegnathus fasciatus]	P00734/0.0/ THRB_HUMAN Prothrombin OS=Homo sapiens GN=F2 PE=1 SV=2	lco:104936791/0.0/f2; coagulation factor II, thrombin; K01313 coagulation factor II (thrombin) [EC:3.4.21.5]	biological_process:GO:0006508//proteolysis;GO:0007596//blood coagulation;cellular_component:GO:0005576//extracellular region;molecular_function:GO:0004252//serine-type endopeptidase activity;GO:0005509//calcium ion binding;
S.schlegelii_GLEAN_10006654	-4.93052	4.38501	0.0017264	0.0231721	gi|736289698|ref|XP_010790471.1|/0/PREDICTED: arrestin domain-containing protein 3-like [Notothenia coriiceps]	Q7TPQ9/6e-41/ ARRD3_MOUSE Arrestin domain-containing protein 3 OS=Mus musculus GN=Arrdc3 PE=2 SV=1	nfu:107380699/5e-25/thioredoxin-interacting protein-like; K20910 thioredoxin-interacting protein	NA
S.schlegelii_GLEAN_10018856	-4.92211	4.37761	0.00143541	0.0193509	gi|734618368|ref|XP_010736928.1|/1.53702e-161/PREDICTED: uncharacterized protein LOC104925084 isoform X1 [Larimichthys crocea] &gt;gi|734618370|ref|XP_010736929.1| PREDICTED: uncharacterized protein LOC104925084 isoform X1 [Larimichthys crocea]	Q3UPF5/1e-11/ ZCCHV_MOUSE Zinc finger CCCH-type antiviral protein 1 OS=Mus musculus GN=Zc3hav1 PE=1 SV=1	amj:106736859/5e-16/ZC3HAV1; poly [ADP-ribose] polymerase 12; K15259 poly [ADP-ribose] polymerase 7/11/12/13 [EC:2.4.2.30]	NA
S.schlegelii_GLEAN_10021141	-4.91849	4.37696	0.00135748	0.0184135	gi|432873526|ref|XP_004072260.1|/0/PREDICTED: histone-lysine N-methyltransferase SMYD1 isoform X1 [Oryzias latipes]	Q8NB12/0.0/ SMYD1_HUMAN Histone-lysine N-methyltransferase SMYD1 OS=Homo sapiens GN=SMYD1 PE=1 SV=1	lcf:108882344/0.0/histone-lysine N-methyltransferase SMYD1-like isoform X1; K11426 SET and MYND domain-containing protein	molecular_function:GO:0005515//protein binding;
S.schlegelii_GLEAN_10010521	-4.91823	4.37631	0.00125226	0.0175567	gi|498986585|ref|XP_004551319.1|/3.45539e-167/PREDICTED: MIT domain-containing protein 1 [Maylandia zebra] &gt;gi|548379157|ref|XP_005733946.1| PREDICTED: MIT domain-containing protein 1 [Pundamilia nyererei] &gt;gi|554864402|ref|XP_005942266.1| PREDICTED: MIT domain-containing protein 1 [Haplochromis burtoni]	Q5I0J5/1e-118/ MITD1_RAT MIT domain-containing protein 1 OS=Rattus norvegicus GN=Mitd1 PE=2 SV=1	nai:NECAME_14029/3e-40/MIT domain protein; K06698 proteasome activator subunit 3 (PA28 gamma)	NA
S.schlegelii_GLEAN_10011531	-4.91123	4.37287	0.00122926	0.0175567	gi|736293917|ref|XP_010790619.1|/0/PREDICTED: annexin A13 [Notothenia coriiceps]	P27216/5e-112/ ANX13_HUMAN Annexin A13 OS=Homo sapiens GN=ANXA13 PE=1 SV=3	ncc:104963694/0.0/anxa13; annexin A13; K17099 annexin A13	molecular_function:GO:0005509//calcium ion binding;GO:0005544//calcium-dependent phospholipid binding;
S.schlegelii_GLEAN_10017514	-4.90124	4.36795	0.00125396	0.0175567	gi|658832750|ref|XP_008410982.1|/1.38637e-145/PREDICTED: ubiquitin-conjugating enzyme E2 K [Poecilia reticulata] &gt;gi|658832752|ref|XP_008410988.1| PREDICTED: ubiquitin-conjugating enzyme E2 K [Poecilia reticulata]	P61087/4e-134/ UBE2K_MOUSE Ubiquitin-conjugating enzyme E2 K OS=Mus musculus GN=Ube2k PE=1 SV=3	pret:103466870/3e-146/ube2k; ubiquitin-conjugating enzyme E2 K; K04649 ubiquitin-conjugating enzyme (huntingtin interacting protein 2) [EC:2.3.2.23]	NA
S.schlegelii_GLEAN_10016489	-4.89876	4.36679	0.00121667	0.0175567	gi|498951885|ref|XP_004543881.1|/4.7953e-132/PREDICTED: B-cell receptor-associated protein 29 [Maylandia zebra] &gt;gi|548336171|ref|XP_005720828.1| PREDICTED: B-cell receptor-associated protein 29 [Pundamilia nyererei] &gt;gi|835882547|ref|XP_012772660.1| PREDICTED: B-cell receptor-associated protein 29 [Maylandia zebra]	Q9UHQ4/4e-63/ BAP29_HUMAN B-cell receptor-associated protein 29 OS=Homo sapiens GN=BCAP29 PE=1 SV=2	els:105027510/9e-99/dus4l; tRNA-dihydrouridine(20a/20b) synthase [NAD(P)+]-like isoform X1; K05545 tRNA-dihydrouridine synthase 4 [EC:1.3.1.90]	biological_process:GO:0006886//intracellular protein transport;cellular_component:GO:0005783//endoplasmic reticulum;GO:0016021//integral component of membrane;
S.schlegelii_GLEAN_10002692	-4.89849	4.36833	0.00153335	0.020617	gi|736164461|ref|XP_010764122.1|/0/PREDICTED: protein FAM185A [Notothenia coriiceps]	Q8N0U4/3e-82/ F185A_HUMAN Protein FAM185A OS=Homo sapiens GN=FAM185A PE=2 SV=3	NA	NA
S.schlegelii_GLEAN_10020448	-4.88476	4.36024	0.00133243	0.0181862	gi|499050237|ref|XP_004575644.1|/0/PREDICTED: G1/S-specific cyclin-D1 [Maylandia zebra] &gt;gi|548543480|ref|XP_005753683.1| PREDICTED: G1/S-specific cyclin-D1 [Pundamilia nyererei] &gt;gi|584019041|ref|XP_006804229.1| PREDICTED: G1/S-specific cyclin-D1-like [Neolamprologus brichardi]	Q90459/0.0/ CCND1_DANRE G1/S-specific cyclin-D1 OS=Danio rerio GN=ccnd1 PE=2 SV=1	lcf:108877824/0.0/ccnd1; G1/S-specific cyclin-D1; K04503 G1/S-specific cyclin-D1	biological_process:GO:0007049//cell cycle;cellular_component:GO:0005634//nucleus;
S.schlegelii_GLEAN_10001051	-4.88401	4.36055	0.00142475	0.0192355	gi|688549505|ref|XP_005168216.2|/0/PREDICTED: gastrula zinc finger protein XlCGF57.1-like, partial [Danio rerio]	P51523/1e-160/ ZNF84_HUMAN Zinc finger protein 84 OS=Homo sapiens GN=ZNF84 PE=1 SV=2	amex:111189734/2e-180/zinc finger protein 850-like; K09228 KRAB domain-containing zinc finger protein	molecular_function:GO:0046872//metal ion binding;
S.schlegelii_GLEAN_10003723	-4.88385	4.35944	0.00126376	0.0175608	gi|808875975|gb|KKF24659.1|/0/N-acylneuraminate cytidylyltransferase [Larimichthys crocea]	Q90WG6/0.0/ NEUA_ONCMY N-acylneuraminate cytidylyltransferase OS=Oncorhynchus mykiss GN=cmas PE=2 SV=1	lco:104933596/0.0/cmas; cytidine monophosphate N-acetylneuraminic acid synthetase; K21749 N-acylneuraminate/3-deoxy-D-glycero-D-galacto-nononate cytidylyltransferase [EC:2.7.7.43 2.7.7.92]	NA
S.schlegelii_GLEAN_10013710	-4.87926	4.35721	0.00121146	0.0175567	gi|808873007|gb|KKF22385.1|/4.19423e-34/hypothetical protein EH28_21857 [Larimichthys crocea]	NA	NA	NA
S.schlegelii_GLEAN_10016822	-4.87314	4.35418	0.00123433	0.0175567	gi|808867441|gb|KKF17992.1|/0/Hydroxysteroid 11-beta-dehydrogenase 1-like protein [Larimichthys crocea]	Q6PUF3/7e-151/ DHI1L_DANRE Hydroxysteroid 11-beta-dehydrogenase 1-like protein OS=Danio rerio GN=hsd11b1l PE=2 SV=1	dre:100333777/4e-111/hsd11b1lb; hydroxysteroid 11-beta-dehydrogenase 1-like protein; K15680 corticosteroid 11-beta-dehydrogenase isozyme 1 [EC:1.1.1.146]	biological_process:GO:0008152//metabolic process;molecular_function:GO:0016491//oxidoreductase activity;
S.schlegelii_GLEAN_10012428	-4.87231	4.35384	0.00124576	0.0175567	gi|961945238|ref|XP_014914738.1|/1.15807e-92/PREDICTED: high choriolytic enzyme 1-like [Poecilia latipinna]	P31579/3e-63/ LCE_ORYLA Low choriolytic enzyme OS=Oryzias latipes GN=lce PE=1 SV=1	mze:106674745/1e-83/high choriolytic enzyme 1-like; K08778 astacin-like metalloendopeptidase [EC:3.4.-.-]	biological_process:GO:0006508//proteolysis;molecular_function:GO:0004222//metalloendopeptidase activity;GO:0008237//metallopeptidase activity;GO:0008270//zinc ion binding;
S.schlegelii_GLEAN_10006049	-4.86009	4.348	0.00244316	0.0309195	gi|229367288|gb|ACQ58624.1|/8.48802e-136/Group XIIB secretory phospholipase A2-like protein precursor [Anoplopoma fimbria]	Q9BX93/1e-94/ PG12B_HUMAN Group XIIB secretory phospholipase A2-like protein OS=Homo sapiens GN=PLA2G12B PE=1 SV=2	lcf:108884538/3e-130/group XIIB secretory phospholipase A2-like protein; K01047 secretory phospholipase A2 [EC:3.1.1.4]	biological_process:GO:0016042//lipid catabolic process;cellular_component:GO:0005576//extracellular region;molecular_function:GO:0004623//phospholipase A2 activity;GO:0005509//calcium ion binding;
S.schlegelii_GLEAN_10023818	-4.8556	4.34583	0.00248996	0.0310588	gi|734596616|ref|XP_010737824.1|/0/PREDICTED: protein FAM83H-like [Larimichthys crocea]	Q1LVV0/0.0/ FA83H_DANRE Protein FAM83H OS=Danio rerio GN=fam83h PE=3 SV=1	els:105017360/2e-52/fam83d; protein FAM83D; K16805 protein FAM83D	NA
S.schlegelii_GLEAN_10009399	-4.84944	4.34275	0.00238789	0.0309185	gi|808868524|gb|KKF18829.1|/3.75642e-110/PRA1 family protein 3 [Larimichthys crocea]	Q4R4R4/2e-68/ PRAF3_MACFA PRA1 family protein 3 OS=Macaca fascicularis GN=ARL6IP5 PE=2 SV=1	lcf:108898548/2e-112/praf2; PRA1 family protein 2; K20392 PRA1 family protein 2	NA
S.schlegelii_GLEAN_10018548	-4.84816	4.34237	0.00256736	0.0314724	gi|229366316|gb|ACQ58138.1|/4.97776e-83/Transmembrane protein 188 [Anoplopoma fimbria]	Q561X0/3e-83/ NEPR1_DANRE Nuclear envelope phosphatase-regulatory subunit 1 OS=Danio rerio GN=cnep1r1 PE=2 SV=1	NA	biological_process:GO:0035307//positive regulation of protein dephosphorylation;cellular_component:GO:0071595//Nem1-Spo7 phosphatase complex;
S.schlegelii_GLEAN_10021334	-4.8452	4.34072	0.00240555	0.0309185	gi|734618310|ref|XP_010736894.1|/0/PREDICTED: tripartite motif-containing protein 16-like [Larimichthys crocea]	Q99PP9/2e-135/ TRI16_MOUSE Tripartite motif-containing protein 16 OS=Mus musculus GN=Trim16 PE=1 SV=2	lcf:108902750/0.0/LOW QUALITY PROTEIN: tripartite motif-containing protein 16-like; K12006 tripartite motif-containing protein 16	cellular_component:GO:0005622//intracellular;molecular_function:GO:0005515//protein binding;GO:0008270//zinc ion binding;
S.schlegelii_GLEAN_10008378	-4.8347	4.33569	0.00262186	0.0320531	gi|808868700|gb|KKF18961.1|/0/Galactokinase [Larimichthys crocea]	A6H768/3e-169/ GALK1_BOVIN Galactokinase OS=Bos taurus GN=GALK1 PE=2 SV=2	lco:104929289/0.0/galk1; galactokinase 1; K00849 galactokinase [EC:2.7.1.6]	biological_process:GO:0006012//galactose metabolic process;GO:0008152//metabolic process;GO:0046835//carbohydrate phosphorylation;cellular_component:GO:0005737//cytoplasm;molecular_function:GO:0004335//galactokinase activity;GO:0005524//ATP binding;GO:0016301//kinase activity;GO:0016773//phosphotransferase activity, alcohol group as acceptor;
S.schlegelii_GLEAN_10004356	-4.82198	4.33102	0.0030536	0.0368326	gi|808882995|gb|KKF30254.1|/0/X-linked retinitis pigmentosa GTPase regulator [Larimichthys crocea]	Q9N1T2/0.0/ RPGR_CANLF X-linked retinitis pigmentosa GTPase regulator OS=Canis lupus familiaris GN=RPGR PE=2 SV=1	mze:101486822/0.0/X-linked retinitis pigmentosa GTPase regulator-like; K19607 X-linked retinitis pigmentosa GTPase regulator	NA
S.schlegelii_GLEAN_10007549	-4.8144	4.326	0.00240052	0.0309185	gi|734619285|ref|XP_010737435.1|/0/PREDICTED: serum paraoxonase/arylesterase 2-like [Larimichthys crocea]	Q90952/1e-139/ PON2_CHICK Serum paraoxonase/arylesterase 2 OS=Gallus gallus GN=PON2 PE=2 SV=1	lco:104925501/0.0/serum paraoxonase/arylesterase 2-like; K01045 arylesterase / paraoxonase [EC:3.1.1.2 3.1.8.1]	molecular_function:GO:0004064//arylesterase activity;
S.schlegelii_GLEAN_10009905	-4.81058	4.32415	0.00237083	0.0309185	gi|736187667|ref|XP_010770521.1|/1.96153e-142/PREDICTED: peroxisomal membrane protein 11C [Notothenia coriiceps]	Q96HA9/2e-83/ PX11C_HUMAN Peroxisomal membrane protein 11C OS=Homo sapiens GN=PEX11G PE=1 SV=1	ncc:104946388/4e-143/pex11g; peroxisomal membrane protein 11C; K13353 peroxin-11C	biological_process:GO:0016559//peroxisome fission;cellular_component:GO:0005779//integral component of peroxisomal membrane;
S.schlegelii_GLEAN_10000034	-4.80737	4.32409	0.002873	0.0348184	gi|908555605|ref|XP_013122897.1|/5.40938e-91/PREDICTED: CD209 antigen-like isoform X1 [Oreochromis niloticus] &gt;gi|908555608|ref|XP_013122898.1| PREDICTED: CD209 antigen-like isoform X2 [Oreochromis niloticus]	Q8HY11/5e-27/ CLC4M_SYMSY C-type lectin domain family 4 member M OS=Symphalangus syndactylus GN=CLEC4M PE=3 SV=1	els:105029019/2e-78/C-type lectin domain family 4 member M-like isoform X2; K06563 CD209 antigen	biological_process:GO:0006935//chemotaxis;GO:0007165//signal transduction;cellular_component:GO:0016020//membrane;molecular_function:GO:0004888//transmembrane signaling receptor activity;
S.schlegelii_GLEAN_10023619	-4.8036	4.32112	0.00249899	0.0311209	gi|548398840|ref|XP_005738185.1|/8.38938e-44/PREDICTED: calphotin-like [Pundamilia nyererei]	NA	aqu:109582339/2e-07/laminin subunit alpha-like; K06240 laminin, alpha 3/5	NA
S.schlegelii_GLEAN_10008486	-4.8017	4.31989	0.00236457	0.0309185	gi|657552264|ref|XP_008280493.1|/6.49352e-135/PREDICTED: beta-1,3-galactosyltransferase 2-like [Stegastes partitus]	Q5R5Y3/4e-57/ B3GT2_PONAB Beta-1,3-galactosyltransferase 2 OS=Pongo abelii GN=B3GALT2 PE=2 SV=1	lcf:108879039/2e-138/beta-1,3-galactosyltransferase 2-like isoform X1; K07820 beta-1,3-galactosyltransferase 2 [EC:2.4.1.86]	biological_process:GO:0006486//protein glycosylation;cellular_component:GO:0016020//membrane;molecular_function:GO:0008378//galactosyltransferase activity;
S.schlegelii_GLEAN_10021430	-4.78668	4.31285	0.00243457	0.0309195	gi|734603321|ref|XP_010728663.1|/0/PREDICTED: pre-mRNA-splicing factor SYF1 [Larimichthys crocea]	Q9HCS7/0.0/ SYF1_HUMAN Pre-mRNA-splicing factor SYF1 OS=Homo sapiens GN=XAB2 PE=1 SV=2	lco:104918567/0.0/xab2; XPA binding protein 2; K12867 pre-mRNA-splicing factor SYF1	biological_process:GO:0006396//RNA processing;cellular_component:GO:0005622//intracellular;molecular_function:GO:0005515//protein binding;
S.schlegelii_GLEAN_10018143	-4.78383	4.31153	0.00245463	0.0309195	gi|328677243|gb|AEB31344.1|/3.38404e-133/glutathione s-transferase, partial [Epinephelus bruneus]	P30568/1e-127/ GSTA_PLEPL Glutathione S-transferase A OS=Pleuronectes platessa PE=2 SV=1	lco:104920430/4e-130/glutathione S-transferase A; K00799 glutathione S-transferase [EC:2.5.1.18]	molecular_function:GO:0005515//protein binding;
S.schlegelii_GLEAN_10005020	-4.77565	4.30772	0.00245247	0.0309195	gi|808868020|gb|KKF18485.1|/0/Homeobox protein unc-4 [Larimichthys crocea]	Q50D79/1e-160/ UNC4_DANRE Homeobox protein unc-4 homolog OS=Danio rerio GN=uncx PE=2 SV=2	lcf:108887202/0.0/homeobox protein unc-4 homolog; K09328 homeobox protein Unc-4	biological_process:GO:0006355//regulation of transcription, DNA-templated;molecular_function:GO:0003677//DNA binding;GO:0043565//sequence-specific DNA binding;
S.schlegelii_GLEAN_10003420	-4.77454	4.30713	0.00245418	0.0309195	gi|734638779|ref|XP_010748144.1|/0/PREDICTED: NADH dehydrogenase [ubiquinone] complex I, assembly factor 7 isoform X1 [Larimichthys crocea] &gt;gi|734638781|ref|XP_010748145.1| PREDICTED: NADH dehydrogenase [ubiquinone] complex I, assembly factor 7 isoform X2 [Larimichthys crocea]	Q08BY0/0.0/ NDUF7_DANRE Protein arginine methyltransferase NDUFAF7, mitochondrial OS=Danio rerio GN=ndufaf7 PE=2 SV=1	lco:104934226/0.0/ndufaf7; NADH:ubiquinone oxidoreductase complex assembly factor 7; K18164 NADH dehydrogenase [ubiquinone] 1 alpha subcomplex assembly factor 7	NA
S.schlegelii_GLEAN_10008700	-4.76632	4.30333	0.00241629	0.0309185	gi|736260453|ref|XP_010789532.1|/1.63154e-92/PREDICTED: cellular retinoic acid-binding protein 2-like [Notothenia coriiceps]	P50568/1e-68/ RABP2_XENLA Cellular retinoic acid-binding protein 2 OS=Xenopus laevis GN=crabp2 PE=2 SV=2	ncc:104962739/3e-93/cellular retinoic acid-binding protein 2-like; K17289 cellular retinoic acid-binding protein 2	biological_process:GO:0006810//transport;molecular_function:GO:0005215//transporter activity;GO:0008289//lipid binding;
S.schlegelii_GLEAN_10006605	-4.75851	4.29967	0.00242749	0.0309195	gi|734609397|ref|XP_010732000.1|/0/PREDICTED: pleckstrin homology domain-containing family A member 2 [Larimichthys crocea]	Q3ZBA3/1e-155/ PKHA2_BOVIN Pleckstrin homology domain-containing family A member 2 OS=Bos taurus GN=PLEKHA2 PE=2 SV=1	aqu:100631809/3e-13/dual adapter for phosphotyrosine and 3-phosphotyrosine and 3-phosphoinositide-like; K12229 dual adapter for phosphotyrosine and 3-phosphotyrosine and 3-phosphoinositide	NA
S.schlegelii_GLEAN_10009630	-4.75643	4.29881	0.00252921	0.0312229	gi|736262243|ref|XP_010790103.1|/0/PREDICTED: uncharacterized protein LOC104963236 [Notothenia coriiceps]	O94919/5e-08/ ENDD1_HUMAN Endonuclease domain-containing 1 protein OS=Homo sapiens GN=ENDOD1 PE=1 SV=2	hai:109390528/9e-12/ENDOD1; endonuclease domain containing 1; K15049 endonuclease domain-containing 1 protein	NA
S.schlegelii_GLEAN_10006414	-4.74863	4.29514	0.00256822	0.0314724	gi|831550032|ref|XP_012727853.1|/0/PREDICTED: hydroxyacylglutathione hydrolase, mitochondrial isoform X1 [Fundulus heteroclitus]	Q6P963/6e-175/ GLO2_DANRE Hydroxyacylglutathione hydrolase, mitochondrial OS=Danio rerio GN=hagh PE=2 SV=2	lcf:108879744/0.0/hydroxyacylglutathione hydrolase, mitochondrial-like; K01069 hydroxyacylglutathione hydrolase [EC:3.1.2.6]	NA
S.schlegelii_GLEAN_10017143	-4.71832	4.28108	0.00244221	0.0309195	gi|498932055|ref|XP_004540084.1|/3.2027e-105/PREDICTED: ubiquitin-conjugating enzyme E2 D3 isoform X1 [Maylandia zebra] &gt;gi|548392925|ref|XP_005736795.1| PREDICTED: ubiquitin-conjugating enzyme E2 D3 isoform X1 [Pundamilia nyererei] &gt;gi|584007451|ref|XP_006798697.1| PREDICTED: ubiquitin-conjugating enzyme E2 D2-like [Neolamprologus brichardi] &gt;gi|930765279|ref|XP_005946087.2| PREDICTED: …	P62840/1e-103/ UB2D2_XENLA Ubiquitin-conjugating enzyme E2 D2 OS=Xenopus laevis GN=ube2d2 PE=1 SV=1	lco:104938947/5e-106/ubiquitin-conjugating enzyme E2 D3-like; K06689 ubiquitin-conjugating enzyme E2 D [EC:2.3.2.23]	NA
S.schlegelii_GLEAN_10018896	-1.59893	6.09794	0.00152458	0.020517	gi|808862754|gb|KKF14219.1|/0/Forkhead box protein M1 [Larimichthys crocea]	P97691/1e-149/ FOXM1_RAT Forkhead box protein M1 OS=Rattus norvegicus GN=Foxm1 PE=2 SV=2	lcf:108886184/0.0/foxm1; forkhead box protein M1 isoform X1; K09406 forkhead box protein M	biological_process:GO:0006355//regulation of transcription, DNA-templated;molecular_function:GO:0003700//sequence-specific DNA binding transcription factor activity;GO:0043565//sequence-specific DNA binding;
S.schlegelii_GLEAN_10000220	-1.56167	6.478	0.00204356	0.0273812	gi|255672679|gb|ACU27029.1|/3.49276e-84/novel immune-type receptor 30 [Dicentrarchus labrax]	NA	NA	molecular_function:GO:0005515//protein binding;
S.schlegelii_GLEAN_10015920	-1.48421	7.70741	0.00383285	0.0459792	gi|348519594|ref|XP_003447315.1|/8.91253e-53/PREDICTED: uncharacterized protein LOC100711840 isoform X1 [Oreochromis niloticus]	NA	NA	NA
S.schlegelii_GLEAN_10015018	-1.46249	5.97946	0.000682888	0.0102908	gi|808866780|gb|KKF17432.1|/1.00818e-160/PAXIP1-associated protein 1 [Larimichthys crocea]	Q5M865/2e-46/ PAGR1_RAT PAXIP1-associated glutamate-rich protein 1 OS=Rattus norvegicus GN=PAGR1 PE=1 SV=2	lco:104926876/2e-161/pagr1; PAXIP1 associated glutamate rich protein 1; K14973 PAXIP1-associated protein 1	NA
S.schlegelii_GLEAN_10007953	-1.43768	6.91357	5.76785e-06	0.000139035	gi|18157526|dbj|BAB83841.1|/0/ReO_6 [Oryzias latipes]	Q95SX7/3e-20/ RTBS_DROME Probable RNA-directed DNA polymerase from transposon BS OS=Drosophila melanogaster GN=RTase PE=2 SV=1	csem:103389101/1e-103/LOW QUALITY PROTEIN: ryanodine receptor 3-like; K04963 ryanodine receptor 3	biological_process:GO:0055114//oxidation-reduction process;molecular_function:GO:0008168//methyltransferase activity;GO:0016706//oxidoreductase activity, acting on paired donors, with incorporation or reduction of molecular oxygen, 2-oxoglutarate as one donor, and incorporation of one atom each of oxygen into both donors;
S.schlegelii_GLEAN_10015952	-1.35134	6.92187	0.00348743	0.041901	gi|808884933|gb|KKF31808.1|/2.82132e-114/hypothetical protein EH28_23503 [Larimichthys crocea]	NA	NA	NA
S.schlegelii_GLEAN_10014767	-1.26279	6.68092	0.00317352	0.0382491	gi|736260174|ref|XP_010789449.1|/6.07131e-154/PREDICTED: pleckstrin homology domain-containing family B member 2 [Notothenia coriiceps]	Q5F3S2/4e-93/ PKHB2_CHICK Pleckstrin homology domain-containing family B member 2 OS=Gallus gallus GN=PLEKHB2 PE=2 SV=1	crg:105319509/5e-24/uncharacterized protein LOC105319509; K00968 choline-phosphate cytidylyltransferase [EC:2.7.7.15]	NA
S.schlegelii_GLEAN_10018657	-1.24421	6.95331	0.0030293	0.0365683	gi|409107876|gb|AFV13294.1|/0/pattern recognition receptor [Oplegnathus fasciatus]	Q15399/5e-152/ TLR1_HUMAN Toll-like receptor 1 OS=Homo sapiens GN=TLR1 PE=1 SV=3	xma:102229909/0.0/toll-like receptor 1; K05398 toll-like receptor 1	biological_process:GO:0002755//MyD88-dependent toll-like receptor signaling pathway;GO:0006954//inflammatory response;GO:0007165//signal transduction;GO:0034150//toll-like receptor 6 signaling pathway;GO:0042088//T-helper 1 type immune response;GO:0042496//detection of diacyl bacterial lipopeptide;GO:0045410//positive regulation of interleukin-6 biosynthetic process;GO:0050707//regulation of cyto…
S.schlegelii_GLEAN_10023086	-1.18171	8.41821	0.002115	0.0283137	gi|734632994|ref|XP_010744958.1|/0/PREDICTED: alpha-(1,3)-fucosyltransferase 9 [Larimichthys crocea]	Q99JB3/6e-130/ FUT9_RAT Alpha-(1,3)-fucosyltransferase 9 OS=Rattus norvegicus GN=Fut9 PE=2 SV=1	lcf:108874965/0.0/fut9; alpha-(1,3)-fucosyltransferase 9; K03663 4-galactosyl-N-acetylglucosaminide 3-alpha-L-fucosyltransferase [EC:2.4.1.152]	biological_process:GO:0006486//protein glycosylation;cellular_component:GO:0016020//membrane;molecular_function:GO:0008417//fucosyltransferase activity;
S.schlegelii_GLEAN_10006931	-1.17891	9.25883	0.0023784	0.0309185	gi|688557767|ref|XP_009300232.1|/1.79286e-169/PREDICTED: uncharacterized protein LOC103911140 isoform X1 [Danio rerio]	NA	sko:102807548/6e-80/uncharacterized LOC102807548; K17388 Rho-associated protein kinase 2 [EC:2.7.11.1]	NA
S.schlegelii_GLEAN_10018417	-1.15163	6.54471	0.00233867	0.0309185	gi|808866006|gb|KKF16779.1|/0/Hypothetical protein EH28_24704 [Larimichthys crocea]	P0C221/2e-07/ CC175_HUMAN Coiled-coil domain-containing protein 175 OS=Homo sapiens GN=CCDC175 PE=4 SV=2	tng:GSTEN00023219G001/3e-86/unnamed protein product; K18764 nocturnin [EC:3.1.13.4]	NA
S.schlegelii_GLEAN_10016494	-1.13259	7.65126	5.8697e-05	0.00114668	gi|657571230|ref|XP_008289177.1|/0/PREDICTED: tristetraprolin-like [Stegastes partitus]	A4IIN5/3e-31/ TISD_XENTR mRNA decay activator protein ZFP36L2 OS=Xenopus tropicalis GN=zfp36l2 PE=2 SV=2	lco:104928501/0.0/mRNA decay activator protein ZFP36; K15308 tristetraprolin	molecular_function:GO:0046872//metal ion binding;
S.schlegelii_GLEAN_10002535	-1.07865	7.8663	3.16362e-06	8.24743e-05	gi|808883166|gb|KKF30405.1|/0/Tripartite motif-containing protein 16 [Larimichthys crocea]	Q99PP9/2e-57/ TRI16_MOUSE Tripartite motif-containing protein 16 OS=Mus musculus GN=Trim16 PE=1 SV=2	pret:103480841/0.0/tripartite motif-containing protein 16-like; K12006 tripartite motif-containing protein 16	cellular_component:GO:0005622//intracellular;molecular_function:GO:0005515//protein binding;GO:0008270//zinc ion binding;
S.schlegelii_GLEAN_10000052	-1.05023	8.25667	0.00414871	0.0496907	gi|599127469|gb|AHN53411.1|/0/transposase [Nuttalliella namaqua]	P35072/7e-47/ TCB1_CAEBR Transposable element Tcb1 transposase OS=Caenorhabditis briggsae PE=3 SV=1	els:105029842/1e-97/zinc finger protein 135-like isoform X1; K09228 KRAB domain-containing zinc finger protein	biological_process:GO:0006313//transposition, DNA-mediated;GO:0015074//DNA integration;molecular_function:GO:0003677//DNA binding;
S.schlegelii_GLEAN_10013057	-1.03586	7.18936	0.000154906	0.002769	gi|657593278|ref|XP_008301203.1|/7.40658e-135/PREDICTED: claudin-4-like [Stegastes partitus]	Q63400/3e-22/ CLD3_RAT Claudin-3 OS=Rattus norvegicus GN=Cldn3 PE=1 SV=2	lcf:108876233/7e-136/claudin-3-like; K06087 claudin	cellular_component:GO:0005923//tight junction;GO:0016021//integral component of membrane;molecular_function:GO:0005198//structural molecule activity;
S.schlegelii_GLEAN_10019422	1.08898	8.14989	3.91197e-05	0.00079772	gi|542219790|ref|XP_005449791.1|/8.64485e-94/PREDICTED: leucine-rich repeat and fibronectin type-III domain-containing protein 5-like isoform X3 [Oreochromis niloticus]	Q96NI6/4e-69/ LRFN5_HUMAN Leucine-rich repeat and fibronectin type-III domain-containing protein 5 OS=Homo sapiens GN=LRFN5 PE=1 SV=2	mze:101482278/5e-94/leucine-rich repeat and fibronectin type-III domain-containing protein 5-like; K16358 leucine-rich repeat and fibronectin type-III domain-containing protein 5	molecular_function:GO:0005515//protein binding;
S.schlegelii_GLEAN_10012703	4.72256	4.28342	0.00242235	0.0309195	gi|808874451|gb|KKF23538.1|/0/Coiled-coil domain-containing protein 30 [Larimichthys crocea]	Q8BVF4/2e-06/ CCD30_MOUSE Coiled-coil domain-containing protein 30 OS=Mus musculus GN=Ccdc30 PE=1 SV=1	NA	NA
S.schlegelii_GLEAN_10018080	4.72577	4.2849	0.00244208	0.0309195	gi|973139561|ref|XP_015213469.1|/1.46774e-108/PREDICTED: transformer-2 protein homolog alpha isoform X3 [Lepisosteus oculatus]	Q13595/3e-84/ TRA2A_HUMAN Transformer-2 protein homolog alpha OS=Homo sapiens GN=TRA2A PE=1 SV=1	mze:101477726/8e-107/tra2a; transformer 2 alpha homolog; K12897 transformer-2 protein	molecular_function:GO:0003676//nucleic acid binding;
S.schlegelii_GLEAN_10007514	4.72649	4.28523	0.0023672	0.0309185	gi|734644680|ref|XP_010751391.1|/0/PREDICTED: N-acetylglutamate synthase, mitochondrial [Larimichthys crocea]	Q8N159/2e-144/ NAGS_HUMAN N-acetylglutamate synthase, mitochondrial OS=Homo sapiens GN=NAGS PE=1 SV=1	lcf:108898586/0.0/N-acetylglutamate synthase, mitochondrial-like; K11067 N-acetylglutamate synthase [EC:2.3.1.1]	NA
S.schlegelii_GLEAN_10006619	4.72838	4.2861	0.00241915	0.0309195	gi|734609371|ref|XP_010731986.1|/0/PREDICTED: protein limb expression 1 homolog [Larimichthys crocea]	Q8UVV7/1e-101/ LIX1_CHICK Protein limb expression 1 OS=Gallus gallus GN=LIX1 PE=2 SV=1	zne:110826850/8e-85/protein limb expression 1 homolog isoform X1; K16673 LIX1-like protein	NA
S.schlegelii_GLEAN_10007949	4.7304	4.28705	0.00236921	0.0309185	gi|808877127|gb|KKF25678.1|/3.14888e-145/ADP-ribosylation factor-related protein 1 [Larimichthys crocea]	Q32LJ2/7e-133/ ARFRP_BOVIN ADP-ribosylation factor-related protein 1 OS=Bos taurus GN=ARFRP1 PE=2 SV=1	lco:104933903/6e-146/arfrp1; ADP ribosylation factor related protein 1; K07952 ADP-ribosylation factor related protein 1	biological_process:GO:0007264//small GTPase mediated signal transduction;cellular_component:GO:0005622//intracellular;molecular_function:GO:0005525//GTP binding;
S.schlegelii_GLEAN_10021080	4.73105	4.28734	0.00243069	0.0309195	gi|734631337|ref|XP_010744050.1|/1.26965e-142/PREDICTED: leukocyte surface antigen CD53-like [Larimichthys crocea]	B3VSC2/5e-36/ TSN9_SHEEP Tetraspanin-9 OS=Ovis aries GN=TSPAN9 PE=2 SV=1	xma:102238010/4e-130/leukocyte surface antigen CD53-like; K06489 CD53 antigen	cellular_component:GO:0016021//integral component of membrane;
S.schlegelii_GLEAN_10000469	4.73301	4.28824	0.00250993	0.0311939	gi|808866841|gb|KKF17480.1|/0/Glucose 1,6-bisphosphate synthase [Larimichthys crocea]	Q6PCE3/0.0/ PGM2L_HUMAN Glucose 1,6-bisphosphate synthase OS=Homo sapiens GN=PGM2L1 PE=1 SV=3	lcf:108902879/0.0/pgm2l1; glucose 1,6-bisphosphate synthase; K11809 glucose-1,6-bisphosphate synthase [EC:2.7.1.106]	biological_process:GO:0005975//carbohydrate metabolic process;GO:0071704//organic substance metabolic process;molecular_function:GO:0000287//magnesium ion binding;GO:0016868//intramolecular transferase activity, phosphotransferases;
S.schlegelii_GLEAN_10022039	4.7365	4.28983	0.00237854	0.0309185	gi|229365780|gb|ACQ57870.1|/1.07064e-148/40S ribosomal protein S8 [Anoplopoma fimbria] &gt;gi|229365798|gb|ACQ57879.1| 40S ribosomal protein S8 [Anoplopoma fimbria]	P62243/5e-137/ RS8_RAT 40S ribosomal protein S8 OS=Rattus norvegicus GN=Rps8 PE=1 SV=2	bpec:110155712/8e-149/rps8; 40S ribosomal protein S8; K02995 small subunit ribosomal protein S8e	biological_process:GO:0006412//translation;cellular_component:GO:0005622//intracellular;GO:0005840//ribosome;molecular_function:GO:0003735//structural constituent of ribosome;
S.schlegelii_GLEAN_10015559	4.73673	4.28996	0.0024581	0.0309379	gi|808883089|gb|KKF30341.1|/0/N-lysine methyltransferase setd6 [Larimichthys crocea]	C0H8I2/0.0/ SETD6_SALSA N-lysine methyltransferase setd6 OS=Salmo salar GN=setd6 PE=2 SV=1	lco:104936054/0.0/setd6; SET domain containing 6; K05302 N-lysine methyltransferase SETD6 [EC:2.1.1.-]	molecular_function:GO:0005515//protein binding;
S.schlegelii_GLEAN_10018647	4.73684	4.29003	0.00237041	0.0309185	gi|808880382|gb|KKF28262.1|/0/Eukaryotic peptide chain release factor subunit 1 [Larimichthys crocea]	P62498/0.0/ ERF1_XENTR Eukaryotic peptide chain release factor subunit 1 OS=Xenopus tropicalis GN=etf1 PE=2 SV=1	lcf:108899222/0.0/etf1; eukaryotic peptide chain release factor subunit 1; K03265 peptide chain release factor subunit 1	biological_process:GO:0006415//translational termination;cellular_component:GO:0005737//cytoplasm;molecular_function:GO:0016149//translation release factor activity, codon specific;
S.schlegelii_GLEAN_10014572	4.73817	4.29061	0.00252073	0.0312144	gi|736185371|ref|XP_010769917.1|/0/PREDICTED: isthmin-2-like [Notothenia coriiceps]	Q58T08/3e-133/ ISM2_DANRE Isthmin-2 OS=Danio rerio GN=ism2 PE=2 SV=1	NA	NA
S.schlegelii_GLEAN_10014823	4.73867	4.29106	0.00279348	0.0338814	gi|808881669|gb|KKF29194.1|/0/Protein NLRC3 [Larimichthys crocea]	Q7RTR2/4e-86/ NLRC3_HUMAN NLR family CARD domain-containing protein 3 OS=Homo sapiens GN=NLRC3 PE=1 SV=2	lcf:108888235/0.0/NACHT, LRR and PYD domains-containing protein 12-like; K20865 NACHT, LRR and PYD domains-containing protein 12	molecular_function:GO:0005515//protein binding;
S.schlegelii_GLEAN_10023613	4.73923	4.29111	0.0024123	0.0309185	gi|734604273|ref|XP_010729181.1|/0/PREDICTED: monocarboxylate transporter 13-like [Larimichthys crocea]	O15403/2e-82/ MOT7_HUMAN Monocarboxylate transporter 7 OS=Homo sapiens GN=SLC16A6 PE=1 SV=2	lcm:102363833/2e-87/SLC16A6; solute carrier family 16 member 6; K08183 MFS transporter, MCP family, solute carrier family 16 (monocarboxylic acid transporters), member 6	biological_process:GO:0055085//transmembrane transport;cellular_component:GO:0016021//integral component of membrane;
S.schlegelii_GLEAN_10015215	4.73924	4.29109	0.00258792	0.0316886	gi|548521812|ref|XP_005751274.1|/0/PREDICTED: transmembrane protein 231 [Pundamilia nyererei] &gt;gi|554835947|ref|XP_005928464.1| PREDICTED: transmembrane protein 231 [Haplochromis burtoni]	Q7T316/3e-167/ TM231_DANRE Transmembrane protein 231 OS=Danio rerio GN=tmem231 PE=2 SV=2	mze:101471623/0.0/tmem231; transmembrane protein 231; K19362 transmembrane protein 231	NA
S.schlegelii_GLEAN_10021676	4.74052	4.29176	0.00249744	0.0311209	gi|736220720|ref|XP_010779786.1|/0/PREDICTED: nucleobindin-2-like [Notothenia coriiceps] &gt;gi|736220724|ref|XP_010779787.1| PREDICTED: nucleobindin-2-like [Notothenia coriiceps]	Q02819/1e-169/ NUCB1_MOUSE Nucleobindin-1 OS=Mus musculus GN=Nucb1 PE=1 SV=2	ncc:104954386/0.0/nucleobindin-2-like; K20371 nucleobindin	molecular_function:GO:0005509//calcium ion binding;
S.schlegelii_GLEAN_10004854	4.7407	4.29171	0.00262729	0.0320814	gi|908456634|ref|XP_013122481.1|/0/PREDICTED: extracellular serine/threonine protein kinase FAM20C-like [Oreochromis niloticus]	Q8IXL6/2e-121/ FA20C_HUMAN Extracellular serine/threonine protein kinase FAM20C OS=Homo sapiens GN=FAM20C PE=1 SV=2	mze:105940495/0.0/extracellular serine/threonine protein kinase FAM20C-like; K21958 extracellular serine/threonine protein kinase FAM20C [EC:2.7.11.1]	NA
S.schlegelii_GLEAN_10009314	4.74227	4.29254	0.00252955	0.0312229	gi|554808130|ref|XP_005914978.1|/6.48715e-66/PREDICTED: emerin [Haplochromis burtoni]	NA	lcf:108876496/4e-70/emd; emerin; K12569 emerin	NA
S.schlegelii_GLEAN_10006865	4.74267	4.2927	0.00246624	0.0309895	gi|221158258|gb|ACM07327.1|/3.91774e-101/troponin I [Siniperca chuatsi]	P68247/4e-56/ TNNI2_COTJA Troponin I, fast skeletal muscle OS=Coturnix japonica GN=TNNI2 PE=3 SV=2	ola:101155923/1e-99/troponin I, fast skeletal muscle-like; K12043 troponin I, fast skeletal muscle	cellular_component:GO:0005861//troponin complex;
S.schlegelii_GLEAN_10004636	4.74563	4.29406	0.00234932	0.0309185	gi|808879140|gb|KKF27228.1|/3.41448e-118/Ankyrin repeat domain-containing protein 49 [Larimichthys crocea]	Q8WVL7/1e-82/ ANR49_HUMAN Ankyrin repeat domain-containing protein 49 OS=Homo sapiens GN=ANKRD49 PE=1 SV=1	lco:109139138/6e-119/ankyrin repeat domain-containing protein 49-like; K21439 ankyrin repeat domain-containing protein 49	molecular_function:GO:0005515//protein binding;
S.schlegelii_GLEAN_10002469	4.7472	4.29481	0.00248636	0.0310588	gi|734615255|ref|XP_010735211.1|/0/PREDICTED: thioredoxin reductase 1, cytoplasmic [Larimichthys crocea]	O62768/6e-173/ TRXR1_BOVIN Thioredoxin reductase 1, cytoplasmic OS=Bos taurus GN=TXNRD1 PE=2 SV=3	lco:104923739/0.0/txnrd1; thioredoxin reductase 1, cytoplasmic; K22182 thioredoxin reductase (NADPH) [EC:1.8.1.9]	biological_process:GO:0045454//cell redox homeostasis;GO:0055114//oxidation-reduction process;molecular_function:GO:0016491//oxidoreductase activity;
S.schlegelii_GLEAN_10003971	4.74726	4.29489	0.00260736	0.0319012	gi|962023699|ref|XP_014882158.1|/0/PREDICTED: GTPase IMAP family member 8-like [Poecilia latipinna]	Q8ND71/4e-27/ GIMA8_HUMAN GTPase IMAP family member 8 OS=Homo sapiens GN=GIMAP8 PE=2 SV=2	ncc:104955459/3e-37/uncharacterized protein LOC104955459; K04868 voltage-dependent calcium channel gamma-3	molecular_function:GO:0005525//GTP binding;
S.schlegelii_GLEAN_10008549	4.75011	4.29619	0.00253169	0.0312242	gi|642101968|emb|CDQ76057.1|/0/unnamed protein product [Oncorhynchus mykiss]	Q7Z4F1/3e-134/ LRP10_HUMAN Low-density lipoprotein receptor-related protein 10 OS=Homo sapiens GN=LRP10 PE=1 SV=2	mze:101485903/0.0/lrp10; LDL receptor related protein 10; K20050 low-density lipoprotein receptor-related protein 3/10/12	molecular_function:GO:0005515//protein binding;
S.schlegelii_GLEAN_10006949	4.7515	4.2968	0.00239057	0.0309185	gi|808874914|gb|KKF23895.1|/5.08091e-146/Eukaryotic translation initiation factor 3 subunit K [Larimichthys crocea]	Q567V6/3e-140/ EIF3K_DANRE Eukaryotic translation initiation factor 3 subunit K OS=Danio rerio GN=eif3k PE=2 SV=1	lco:104927502/6e-145/eif3k; eukaryotic translation initiation factor 3 subunit K; K15028 translation initiation factor 3 subunit K	cellular_component:GO:0005737//cytoplasm;GO:0005852//eukaryotic translation initiation factor 3 complex;molecular_function:GO:0003743//translation initiation factor activity;
S.schlegelii_GLEAN_10021054	4.75204	4.29706	0.00241182	0.0309185	gi|657573945|ref|XP_008290658.1|/0/PREDICTED: RNA demethylase ALKBH5 [Stegastes partitus]	Q08BA6/2e-176/ ALKB5_DANRE RNA demethylase ALKBH5 OS=Danio rerio GN=alkbh5 PE=1 SV=1	lco:104921183/0.0/alkbh5; alkB homolog 5, RNA demethylase; K10767 mRNA N6-methyladenine demethylase [EC:1.14.11.53]	biological_process:GO:0006397//mRNA processing;GO:0035553//oxidative single-stranded RNA demethylation;molecular_function:GO:0035515//oxidative RNA demethylase activity;
S.schlegelii_GLEAN_10010459	4.75283	4.29744	0.00238514	0.0309185	gi|554869954|ref|XP_005944958.1|/0/PREDICTED: cholecystokinin receptor-like isoform X2 [Haplochromis burtoni]	P70031/6e-140/ CCKAR_XENLA Cholecystokinin receptor OS=Xenopus laevis GN=cckar PE=2 SV=1	lcf:108884407/0.0/cholecystokinin receptor-like; K04194 cholecystokinin A receptor	biological_process:GO:0007186//G-protein coupled receptor signaling pathway;cellular_component:GO:0016021//integral component of membrane;molecular_function:GO:0004930//G-protein coupled receptor activity;GO:0015054//gastrin receptor activity;
S.schlegelii_GLEAN_10019327	4.75441	4.29817	0.00238874	0.0309185	gi|734614890|ref|XP_010735021.1|/3.14366e-104/PREDICTED: protein FAM228B [Larimichthys crocea]	Q497Q6/8e-22/ F228B_MOUSE Protein FAM228B OS=Mus musculus GN=Fam228b PE=2 SV=1	NA	NA
S.schlegelii_GLEAN_10015714	4.75913	4.30036	0.00254587	0.031316	gi|736153297|ref|XP_010780828.1|/0/PREDICTED: sulfite oxidase, mitochondrial isoform X1 [Notothenia coriiceps]	Q07116/0.0/ SUOX_RAT Sulfite oxidase, mitochondrial OS=Rattus norvegicus GN=Suox PE=1 SV=2	ncc:104955219/0.0/suox; sulfite oxidase, mitochondrial isoform X1; K00387 sulfite oxidase [EC:1.8.3.1]	biological_process:GO:0042128//nitrate assimilation;GO:0055114//oxidation-reduction process;molecular_function:GO:0016491//oxidoreductase activity;GO:0020037//heme binding;GO:0030151//molybdenum ion binding;
S.schlegelii_GLEAN_10014273	4.76032	4.30087	0.00251228	0.0311939	gi|657570497|ref|XP_008288784.1|/0/PREDICTED: tRNA-dihydrouridine(47) synthase [NAD(P)(+)]-like [Stegastes partitus]	Q7ZWS1/0.0/ DUS3L_XENLA tRNA-dihydrouridine(47) synthase [NAD(P)(+)]-like OS=Xenopus laevis GN=dus3l PE=2 SV=1	lco:104927572/0.0/dus3l; dihydrouridine synthase 3 like; K05544 tRNA-dihydrouridine synthase 3 [EC:1.3.1.89]	biological_process:GO:0008033//tRNA processing;GO:0055114//oxidation-reduction process;molecular_function:GO:0017150//tRNA dihydrouridine synthase activity;GO:0046872//metal ion binding;GO:0050660//flavin adenine dinucleotide binding;
S.schlegelii_GLEAN_10022278	4.76033	4.30091	0.00246262	0.0309693	gi|808878533|gb|KKF26760.1|/4.38929e-135/EF-hand domain-containing protein [Larimichthys crocea]	Q8BGQ6/5e-86/ EFC14_MOUSE EF-hand calcium-binding domain-containing protein 14 OS=Mus musculus GN=Efcab14 PE=2 SV=1	isc:IscW_ISCW008155/3e-09/RNAse H, putative; K14570 RNA exonuclease 1 [EC:3.1.-.-]	NA
S.schlegelii_GLEAN_10022789	4.768	4.3045	0.00248421	0.0310588	gi|808873970|gb|KKF23173.1|/0/Glycine N-methyltransferase [Larimichthys crocea]	P13255/9e-165/ GNMT_RAT Glycine N-methyltransferase OS=Rattus norvegicus GN=Gnmt PE=1 SV=2	lcf:108898000/0.0/gnmt; glycine N-methyltransferase isoform X1; K00552 glycine N-methyltransferase [EC:2.1.1.20]	molecular_function:GO:0017174//glycine N-methyltransferase activity;
S.schlegelii_GLEAN_10018028	4.76866	4.30481	0.00240279	0.0309185	gi|542211836|ref|XP_005478707.1|/0/PREDICTED: SWI/SNF complex subunit SMARCC1-like [Oreochromis niloticus]	P97496/0.0/ SMRC1_MOUSE SWI/SNF complex subunit SMARCC1 OS=Mus musculus GN=Smarcc1 PE=1 SV=2	lco:104922097/0.0/SWI/SNF complex subunit SMARCC1-like; K11649 SWI/SNF related-matrix-associated actin-dependent regulator of chromatin subfamily C	biological_process:GO:0043044//ATP-dependent chromatin remodeling;cellular_component:GO:0016514//SWI/SNF complex;molecular_function:GO:0005515//protein binding;
S.schlegelii_GLEAN_10019832	4.77038	4.30561	0.00236595	0.0309185	gi|736192762|ref|XP_010771855.1|/0/PREDICTED: muscleblind-like protein 2a isoform X2 [Notothenia coriiceps]	Q6Q2B2/0.0/ MBN2A_TAKRU Muscleblind-like protein 2a OS=Takifugu rubripes GN=mbnl2a PE=2 SV=1	ncc:104947512/0.0/muscleblind-like protein 2a isoform X1; K14943 muscleblind	molecular_function:GO:0046872//metal ion binding;
S.schlegelii_GLEAN_10006767	4.77172	4.30623	0.00247132	0.0310025	gi|317419637|emb|CBN81674.1|/0/Beta-tectorin [Dicentrarchus labrax]	P54097/3e-125/ TECTB_CHICK Beta-tectorin OS=Gallus gallus GN=TECTB PE=2 SV=1	pale:102894139/2e-15/GP2; pancreatic secretory granule membrane major glycoprotein GP2; K19899 pancreatic secretory granule membrane major glycoprotein GP2	NA
S.schlegelii_GLEAN_10017960	4.77173	4.30626	0.00239339	0.0309185	gi|734598266|ref|XP_010746548.1|/0/PREDICTED: probable E3 ubiquitin-protein ligase DTX3 isoform X1 [Larimichthys crocea] &gt;gi|734598268|ref|XP_010746557.1| PREDICTED: probable E3 ubiquitin-protein ligase DTX3 isoform X1 [Larimichthys crocea]	Q80V91/3e-94/ DTX3_MOUSE Probable E3 ubiquitin-protein ligase DTX3 OS=Mus musculus GN=Dtx3 PE=1 SV=2	ncc:104967533/0.0/probable E3 ubiquitin-protein ligase DTX3; K06058 deltex [EC:2.3.2.27]	molecular_function:GO:0005515//protein binding;GO:0008270//zinc ion binding;
S.schlegelii_GLEAN_10019739	4.77199	4.30636	0.00250434	0.0311622	gi|17433144|sp|Q9PW58.3|LDHA_LYCDA/0/RecName: Full=L-lactate dehydrogenase A chain; Short=LDH-A &gt;gi|5726602|gb|AAD48489.1|AF170710_1 lactate dehydrogenase-A [Lycodichthys dearborni]	Q9PW58/0.0/ LDHA_LYCDA L-lactate dehydrogenase A chain OS=Lycodichthys dearborni GN=ldha PE=2 SV=3	lco:104920463/0.0/L-lactate dehydrogenase A chain; K00016 L-lactate dehydrogenase [EC:1.1.1.27]	biological_process:GO:0019752//carboxylic acid metabolic process;GO:0055114//oxidation-reduction process;molecular_function:GO:0004459//L-lactate dehydrogenase activity;GO:0016491//oxidoreductase activity;GO:0016616//oxidoreductase activity, acting on the CH-OH group of donors, NAD or NADP as acceptor;
S.schlegelii_GLEAN_10001862	4.7758	4.30815	0.0023284	0.0309185	gi|657561381|ref|XP_008284322.1|/8.99075e-110/PREDICTED: ganglioside GM2 activator [Stegastes partitus]	Q60648/6e-72/ SAP3_MOUSE Ganglioside GM2 activator OS=Mus musculus GN=Gm2a PE=1 SV=2	lcf:108874585/1e-109/gm2a; ganglioside GM2 activator; K12383 ganglioside GM2 activator	biological_process:GO:0006689//ganglioside catabolic process;molecular_function:GO:0008047//enzyme activator activity;
S.schlegelii_GLEAN_10012641	4.77715	4.30879	0.002401	0.0309185	gi|808887662|gb|KKF33990.1|/0/Prostacyclin synthase [Larimichthys crocea]	F1RE08/1e-167/ PTGIS_DANRE Prostacyclin synthase OS=Danio rerio GN=ptgis PE=1 SV=1	lcf:108889866/0.0/ptgis; prostacyclin synthase; K01831 prostacyclin synthase [EC:5.3.99.4]	biological_process:GO:0055114//oxidation-reduction process;molecular_function:GO:0004497//monooxygenase activity;GO:0005506//iron ion binding;GO:0016705//oxidoreductase activity, acting on paired donors, with incorporation or reduction of molecular oxygen;GO:0020037//heme binding;
S.schlegelii_GLEAN_10009483	4.77848	4.30943	0.00241104	0.0309185	gi|554871066|ref|XP_005945493.1|/3.2775e-157/PREDICTED: synaptogyrin-3 [Haplochromis burtoni]	A2VE58/2e-88/ SNG3_BOVIN Synaptogyrin-3 OS=Bos taurus GN=SYNGR3 PE=2 SV=1	shr:100917660/1e-77/SYNGR3; synaptogyrin 3; K17783 mitochondrial FAD-linked sulfhydryl oxidase [EC:1.8.3.2]	cellular_component:GO:0016020//membrane;
S.schlegelii_GLEAN_10013017	4.77932	4.30981	0.0024157	0.0309185	gi|734599439|ref|XP_010752657.1|/0/PREDICTED: palmitoyltransferase ZDHHC18 isoform X3 [Larimichthys crocea]	Q9NUE0/1e-163/ ZDH18_HUMAN Palmitoyltransferase ZDHHC18 OS=Homo sapiens GN=ZDHHC18 PE=1 SV=2	hcq:109525687/0.0/zdhhc18; palmitoyltransferase ZDHHC18 isoform X1; K16675 palmitoyltransferase ZDHHC9/14/18 [EC:2.3.1.225]	molecular_function:GO:0008270//zinc ion binding;
S.schlegelii_GLEAN_10007926	4.77993	4.31017	0.00267039	0.0324912	gi|49333451|gb|AAT64064.1|/5.43883e-86/claudin 27d [Takifugu rubripes]	O35054/7e-64/ CLD4_MOUSE Claudin-4 OS=Mus musculus GN=Cldn4 PE=1 SV=1	tru:101079688/3e-85/claudin-4-like; K06087 claudin	cellular_component:GO:0005923//tight junction;GO:0016021//integral component of membrane;molecular_function:GO:0005198//structural molecule activity;
S.schlegelii_GLEAN_10019414	4.78129	4.31021	0.00318293	0.0383324	gi|736160519|ref|XP_010786948.1|/0/PREDICTED: uncharacterized protein C14orf37 homolog [Notothenia coriiceps]	Q86TY3/3e-25/ CN037_HUMAN Uncharacterized protein C14orf37 OS=Homo sapiens GN=C14orf37 PE=1 SV=1	mcc:713250/3e-24/high mobility group protein B1-like; K10802 high mobility group protein B1	NA
S.schlegelii_GLEAN_10008160	4.78211	4.31113	0.00241331	0.0309185	gi|734618021|ref|XP_010736734.1|/0/PREDICTED: axin interactor, dorsalization-associated protein [Larimichthys crocea]	Q6PBN2/0.0/ AIDA_DANRE Axin interactor, dorsalization-associated protein OS=Danio rerio GN=aida PE=1 SV=1	NA	NA
S.schlegelii_GLEAN_10018936	4.78362	4.31188	0.00254197	0.0313007	gi|808878501|gb|KKF26742.1|/0/26S proteasome non-ATPase regulatory subunit 14 [Larimichthys crocea]	O35593/0.0/ PSDE_MOUSE 26S proteasome non-ATPase regulatory subunit 14 OS=Mus musculus GN=Psmd14 PE=1 SV=2	sfm:108928981/0.0/psmd14; 26S proteasome non-ATPase regulatory subunit 14; K03030 26S proteasome regulatory subunit N11	molecular_function:GO:0005515//protein binding;
S.schlegelii_GLEAN_10001828	4.78488	4.31243	0.00238782	0.0309185	gi|657560950|ref|XP_008284159.1|/0/PREDICTED: Meckel syndrome type 1 protein [Stegastes partitus]	Q5SW45/0.0/ MKS1_MOUSE Meckel syndrome type 1 protein homolog OS=Mus musculus GN=Mks1 PE=1 SV=1	lcf:108894044/0.0/mks1; Meckel syndrome type 1 protein isoform X1; K19332 Meckel syndrome type 1 protein	NA
S.schlegelii_GLEAN_10008163	4.78627	4.31258	0.00297503	0.0359981	gi|808862634|gb|KKF14116.1|/0/Transmembrane protein 151B [Larimichthys crocea]	A7E2I7/0.0/ T151B_DANRE Transmembrane protein 151B OS=Danio rerio GN=tmem151b PE=2 SV=1	NA	NA
S.schlegelii_GLEAN_10005484	4.78794	4.31383	0.00248629	0.0310588	gi|734607134|ref|XP_010730744.1|/0/PREDICTED: nexilin isoform X1 [Larimichthys crocea]	Q0ZGT2/0.0/ NEXN_HUMAN Nexilin OS=Homo sapiens GN=NEXN PE=1 SV=1	lak:106161264/2e-17/titin-like; K12567 titin [EC:2.7.11.1]	molecular_function:GO:0005515//protein binding;
S.schlegelii_GLEAN_10007941	4.78947	4.31458	0.00247531	0.0310272	gi|317418904|emb|CBN80942.1|/0/Zinc finger protein 572 [Dicentrarchus labrax]	Q3MJ62/7e-24/ ZSC23_HUMAN Zinc finger and SCAN domain-containing protein 23 OS=Homo sapiens GN=ZSCAN23 PE=1 SV=1	sasa:106587649/9e-31/gastrula zinc finger protein XlCGF57.1-like; K09228 KRAB domain-containing zinc finger protein	molecular_function:GO:0046872//metal ion binding;
S.schlegelii_GLEAN_10007968	4.79143	4.31551	0.00241128	0.0309185	gi|542253393|ref|XP_005462568.1|/1.38493e-141/PREDICTED: olfactory receptor 2K2-like isoform X2 [Oreochromis niloticus]	Q13607/8e-31/ OR2F1_HUMAN Olfactory receptor 2F1 OS=Homo sapiens GN=OR2F1 PE=2 SV=2	lcf:108890186/2e-142/LOW QUALITY PROTEIN: olfactory receptor 2K2-like; K04257 olfactory receptor	biological_process:GO:0007186//G-protein coupled receptor signaling pathway;cellular_component:GO:0016021//integral component of membrane;molecular_function:GO:0004930//G-protein coupled receptor activity;
S.schlegelii_GLEAN_10015904	4.79534	4.31738	0.00236253	0.0309185	gi|657527819|ref|XP_008288787.1|/0/PREDICTED: mRNA cap guanine-N7 methyltransferase [Stegastes partitus]	Q1MTD3/4e-155/ MCES_DANRE mRNA cap guanine-N7 methyltransferase OS=Danio rerio GN=rnmt PE=3 SV=1	lco:104931889/0.0/rnmt; RNA guanine-7 methyltransferase; K00565 mRNA (guanine-N7-)-methyltransferase [EC:2.1.1.56]	NA
S.schlegelii_GLEAN_10003097	4.79611	4.31756	0.0026929	0.0327391	gi|734645824|ref|XP_010752021.1|/1.94375e-67/PREDICTED: high affinity immunoglobulin gamma Fc receptor I-like [Larimichthys crocea]	Q68SN8/2e-07/ FCRL5_MOUSE Fc receptor-like protein 5 OS=Mus musculus GN=Fcrl5 PE=1 SV=3	lco:104940028/4e-70/low affinity immunoglobulin gamma Fc region receptor II-like; K06727 Fc receptor-like protein	molecular_function:GO:0005515//protein binding;
S.schlegelii_GLEAN_10003244	4.79902	4.31903	0.00252659	0.0312229	gi|734636202|ref|XP_010746729.1|/1.63513e-157/PREDICTED: peroxisomal membrane protein 11B isoform X1 [Larimichthys crocea]	Q9Z210/1e-105/ PX11B_MOUSE Peroxisomal membrane protein 11B OS=Mus musculus GN=Pex11b PE=1 SV=1	lcf:108896339/2e-165/pex11b; peroxisomal membrane protein 11B; K13352 peroxin-11B	biological_process:GO:0016559//peroxisome fission;cellular_component:GO:0005779//integral component of peroxisomal membrane;
S.schlegelii_GLEAN_10011928	4.8002	4.31966	0.00240086	0.0309185	gi|657599478|ref|XP_008304553.1|/0/PREDICTED: vesicle-trafficking protein SEC22c isoform X2 [Stegastes partitus]	Q9BRL7/1e-112/ SC22C_HUMAN Vesicle-trafficking protein SEC22c OS=Homo sapiens GN=SEC22C PE=1 SV=1	lco:104936949/0.0/sec22c; SEC22 homolog C, vesicle trafficking protein; K08520 SEC22 vesicle trafficking protein A/C	NA
S.schlegelii_GLEAN_10010800	4.80166	4.32035	0.00239327	0.0309185	gi|808883009|gb|KKF30268.1|/0/Sterol 26-hydroxylase, mitochondrial [Larimichthys crocea]	P17178/5e-74/ CP27A_RAT Sterol 26-hydroxylase, mitochondrial OS=Rattus norvegicus GN=Cyp27a1 PE=1 SV=1	lco:104934615/0.0/cytochrome P450 27C1-like; K00488 cholestanetriol 26-monooxygenase [EC:1.14.15.15]	biological_process:GO:0055114//oxidation-reduction process;molecular_function:GO:0005506//iron ion binding;GO:0016705//oxidoreductase activity, acting on paired donors, with incorporation or reduction of molecular oxygen;GO:0020037//heme binding;
S.schlegelii_GLEAN_10012120	4.80305	4.32102	0.00238384	0.0309185	gi|583971204|ref|XP_006781027.1|/0/PREDICTED: nuclear pore complex protein Nup107-like [Neolamprologus brichardi]	P57740/0.0/ NU107_HUMAN Nuclear pore complex protein Nup107 OS=Homo sapiens GN=NUP107 PE=1 SV=1	lcf:108895891/0.0/nup107; LOW QUALITY PROTEIN: nuclear pore complex protein Nup107; K14301 nuclear pore complex protein Nup107	biological_process:GO:0006810//transport;cellular_component:GO:0005643//nuclear pore;
S.schlegelii_GLEAN_10005552	4.8048	4.32199	0.00262835	0.0320814	gi|734640978|ref|XP_010749352.1|/0/PREDICTED: ATP-dependent Clp protease proteolytic subunit, mitochondrial [Larimichthys crocea]	Q2KHU4/5e-139/ CLPP_BOVIN ATP-dependent Clp protease proteolytic subunit, mitochondrial OS=Bos taurus GN=CLPP PE=2 SV=1	lco:104935242/0.0/clpp; caseinolytic mitochondrial matrix peptidase proteolytic subunit; K01358 ATP-dependent Clp protease, protease subunit [EC:3.4.21.92]	biological_process:GO:0006508//proteolysis;molecular_function:GO:0004252//serine-type endopeptidase activity;
S.schlegelii_GLEAN_10006701	4.80559	4.32222	0.00236376	0.0309185	gi|808862956|gb|KKF14388.1|/2.57653e-168/ETS domain-containing protein Elk-3 [Larimichthys crocea]	P41158/4e-70/ ELK4_MOUSE ETS domain-containing protein Elk-4 OS=Mus musculus GN=Elk4 PE=2 SV=2	lco:104930592/5e-169/ETS domain-containing protein Elk-3; K09430 ETS domain-containing protein Elk-3 (SRF accessory protein 2)	biological_process:GO:0006355//regulation of transcription, DNA-templated;molecular_function:GO:0003700//sequence-specific DNA binding transcription factor activity;GO:0043565//sequence-specific DNA binding;
S.schlegelii_GLEAN_10007066	4.80684	4.32285	0.00263961	0.0321932	gi|734607342|ref|XP_010730860.1|/6.47491e-145/PREDICTED: coiled-coil domain-containing protein 117 isoform X2 [Larimichthys crocea]	Q5M9G5/4e-15/ CC117_RAT Coiled-coil domain-containing protein 117 OS=Rattus norvegicus GN=Ccdc117 PE=2 SV=1	NA	NA
S.schlegelii_GLEAN_10012787	4.80783	4.32335	0.0025473	0.031316	gi|657552473|ref|XP_008280607.1|/3.1589e-173/PREDICTED: ubiquitin domain-containing protein 1-like [Stegastes partitus]	Q4V8W7/5e-118/ UBTD1_DANRE Ubiquitin domain-containing protein 1 OS=Danio rerio GN=ubtd1 PE=2 SV=1	ocu:100342501/8e-07/polyubiquitin-B; K08770 ubiquitin C	molecular_function:GO:0005515//protein binding;GO:0043130//ubiquitin binding;
S.schlegelii_GLEAN_10016635	4.80901	4.32387	0.00255837	0.031427	gi|317420123|emb|CBN82159.1|/0/Patched domain-containing protein 3 [Dicentrarchus labrax]	Q0EEE2/0.0/ PTHD3_MOUSE Patched domain-containing protein 3 OS=Mus musculus GN=Ptchd3 PE=1 SV=1	sgh:107550433/2e-51/Niemann-Pick C1 protein-like isoform X1; K12385 Niemann-Pick C1 protein	cellular_component:GO:0016020//membrane;molecular_function:GO:0008158//hedgehog receptor activity;
S.schlegelii_GLEAN_10012804	4.80916	4.32391	0.00243811	0.0309195	gi|736223924|ref|XP_010780676.1|/0/PREDICTED: rho GTPase-activating protein 19 [Notothenia coriiceps]	Q8BRH3/2e-180/ RHG19_MOUSE Rho GTPase-activating protein 19 OS=Mus musculus GN=Arhgap19 PE=1 SV=2	lcf:108888312/0.0/rho GTPase-activating protein 19-like; K20640 Rho GTPase-activating protein 19	biological_process:GO:0007165//signal transduction;
S.schlegelii_GLEAN_10022556	4.80944	4.32395	0.00264375	0.0322181	gi|300218775|gb|ADJ80991.1|/0/CR1-3 [Lycodichthys dearborni]	Q95SX7/2e-22/ RTBS_DROME Probable RNA-directed DNA polymerase from transposon BS OS=Drosophila melanogaster GN=RTase PE=2 SV=1	ncc:104952435/8e-66/uncharacterized protein LOC104952435; K11647 SWI/SNF-related matrix-associated actin-dependent regulator of chromatin subfamily A member 2/4 [EC:3.6.4.-]	NA
S.schlegelii_GLEAN_10009542	4.81203	4.32528	0.00240003	0.0309185	gi|584016499|ref|XP_006803003.1|/2.62657e-156/PREDICTED: voltage-dependent calcium channel gamma-6 subunit-like [Neolamprologus brichardi]	Q8VHW7/2e-70/ CCG6_RAT Voltage-dependent calcium channel gamma-6 subunit OS=Rattus norvegicus GN=Cacng6 PE=2 SV=1	mze:101482520/1e-156/cacng6; calcium voltage-gated channel auxiliary subunit gamma 6; K04871 voltage-dependent calcium channel gamma-6	biological_process:GO:0070588//calcium ion transmembrane transport;cellular_component:GO:0005891//voltage-gated calcium channel complex;GO:0016021//integral component of membrane;molecular_function:GO:0005245//voltage-gated calcium channel activity;
S.schlegelii_GLEAN_10018568	4.81434	4.32639	0.00235894	0.0309185	gi|657541145|ref|XP_008276508.1|/0/PREDICTED: oocyte zinc finger protein XlCOF29-like [Stegastes partitus]	P08043/2e-33/ ZFP2_MOUSE Zinc finger protein 2 OS=Mus musculus GN=Zfp2 PE=2 SV=2	sasa:106561190/5e-34/oocyte zinc finger protein XlCOF22-like; K09228 KRAB domain-containing zinc finger protein	molecular_function:GO:0046872//metal ion binding;
S.schlegelii_GLEAN_10019333	4.81539	4.32689	0.00248857	0.0310588	gi|736170458|ref|XP_010765695.1|/0/PREDICTED: WD repeat-containing protein 26 isoform X2 [Notothenia coriiceps]	Q5SP67/0.0/ WDR26_DANRE WD repeat-containing protein 26 OS=Danio rerio GN=wdr26 PE=1 SV=1	tut:107362251/4e-17/WD repeat-containing protein 5; K14963 COMPASS component SWD3	molecular_function:GO:0005515//protein binding;
S.schlegelii_GLEAN_10021968	4.8171	4.32767	0.00251626	0.0312001	gi|229368140|gb|ACQ59050.1|/3.25321e-93/FAM136A [Anoplopoma fimbria]	Q6PBU0/2e-78/ F136A_DANRE Protein FAM136A OS=Danio rerio GN=fam136a PE=2 SV=1	NA	NA
S.schlegelii_GLEAN_10021230	4.81712	4.32763	0.00252297	0.031217	gi|734618137|ref|XP_010736799.1|/0/PREDICTED: uncharacterized protein LOC104924992 [Larimichthys crocea]	NA	NA	NA
S.schlegelii_GLEAN_10003426	4.81722	4.32776	0.00232578	0.0309185	gi|553727055|ref|NP_001272841.1|/4.54357e-173/ribonuclease H1 [Oreochromis niloticus]	O60930/9e-98/ RNH1_HUMAN Ribonuclease H1 OS=Homo sapiens GN=RNASEH1 PE=1 SV=2	mze:101483155/4e-167/rnaseh1; ribonuclease H1; K03469 ribonuclease HI [EC:3.1.26.4]	molecular_function:GO:0003676//nucleic acid binding;GO:0004523//RNA-DNA hybrid ribonuclease activity;
S.schlegelii_GLEAN_10019402	4.81761	4.32793	0.00253922	0.0312919	gi|808860528|gb|KKF12522.1|/0/WD repeat-containing protein 20 [Larimichthys crocea]	Q8TBZ3/0.0/ WDR20_HUMAN WD repeat-containing protein 20 OS=Homo sapiens GN=WDR20 PE=1 SV=2	aam:106490508/5e-119/SYMPK; symplekin; K06100 symplekin	molecular_function:GO:0005515//protein binding;
S.schlegelii_GLEAN_10006602	4.82365	4.33081	0.00240434	0.0309185	gi|736194215|ref|XP_010772233.1|/1.36858e-135/PREDICTED: IQ domain-containing protein D isoform X1 [Notothenia coriiceps]	Q96DY2/2e-23/ IQCD_HUMAN IQ domain-containing protein D OS=Homo sapiens GN=IQCD PE=2 SV=2	NA	molecular_function:GO:0005515//protein binding;
S.schlegelii_GLEAN_10021410	4.82445	4.33134	0.00266132	0.0324064	gi|736220106|ref|XP_010779627.1|/0/PREDICTED: long-chain fatty acid transport protein 1-like [Notothenia coriiceps]	Q6PCB7/0.0/ S27A1_HUMAN Long-chain fatty acid transport protein 1 OS=Homo sapiens GN=SLC27A1 PE=2 SV=1	lcf:108902729/0.0/slc27a1; long-chain fatty acid transport protein 1; K08745 solute carrier family 27 (fatty acid transporter), member 1/4 [EC:6.2.1.-]	biological_process:GO:0008152//metabolic process;cellular_component:GO:0016021//integral component of membrane;molecular_function:GO:0003824//catalytic activity;GO:0004467//long-chain fatty acid-CoA ligase activity;GO:0015245//fatty acid transporter activity;GO:0031957//very long-chain fatty acid-CoA ligase activity;
S.schlegelii_GLEAN_10010322	4.82449	4.33121	0.00240044	0.0309185	gi|542202880|ref|XP_003449589.2|/9.9963e-114/PREDICTED: transmembrane protein 237A-like [Oreochromis niloticus] &gt;gi|542202882|ref|XP_005475340.1| PREDICTED: transmembrane protein 237A-like [Oreochromis niloticus] &gt;gi|542202886|ref|XP_005475342.1| PREDICTED: transmembrane protein 237A-like [Oreochromis niloticus] &gt;gi|542202888|ref|XP_005475343.1| PREDICTED: transmembrane protein 237A-like…	F1Q930/2e-33/ T237A_DANRE Transmembrane protein 237A OS=Danio rerio GN=tmem237a PE=3 SV=1	fca:101086996/5e-28/MPP4, TMEM237; transmembrane protein 237; K21109 MAGUK p55 subfamily member 4	NA
S.schlegelii_GLEAN_10006279	4.82656	4.33221	0.00241554	0.0309185	gi|736296721|ref|XP_010791664.1|/0/PREDICTED: cyclin-A1 [Notothenia coriiceps] &gt;gi|736296724|ref|XP_010791665.1| PREDICTED: cyclin-A1 [Notothenia coriiceps]	Q61456/2e-122/ CCNA1_MOUSE Cyclin-A1 OS=Mus musculus GN=Ccna1 PE=1 SV=2	ncc:104964547/0.0/ccna1; cyclin-A1; K06627 cyclin-A	cellular_component:GO:0005634//nucleus;
S.schlegelii_GLEAN_10000696	4.82724	4.33256	0.00251299	0.0311939	gi|542201952|ref|XP_005474996.1|/3.99724e-180/PREDICTED: E3 ubiquitin-protein ligase rififylin [Oreochromis niloticus] &gt;gi|542201954|ref|XP_005474997.1| PREDICTED: E3 ubiquitin-protein ligase rififylin [Oreochromis niloticus] &gt;gi|542201956|ref|XP_005474998.1| PREDICTED: E3 ubiquitin-protein ligase rififylin [Oreochromis niloticus] &gt;gi|542201958|ref|XP_005474999.1| PREDICTED: E3 ubiquitin…	Q8WZ73/2e-126/ RFFL_HUMAN E3 ubiquitin-protein ligase rififylin OS=Homo sapiens GN=RFFL PE=1 SV=1	lcf:108874429/0.0/rffl; E3 ubiquitin-protein ligase rififylin; K20804 E3 ubiquitin-protein ligase RNF34 [EC:2.3.2.27]	molecular_function:GO:0005515//protein binding;GO:0008270//zinc ion binding;
S.schlegelii_GLEAN_10018024	4.83196	4.33479	0.0023694	0.0309185	gi|808876530|gb|KKF25166.1|/0/Cytoplasmic dynein 1 light intermediate chain 1 [Larimichthys crocea]	Q90828/0.0/ DC1L1_CHICK Cytoplasmic dynein 1 light intermediate chain 1 OS=Gallus gallus GN=DYNC1LI1 PE=1 SV=1	lco:104922056/0.0/cytoplasmic dynein 1 light intermediate chain 1; K10416 dynein light intermediate chain 1, cytosolic	biological_process:GO:0007018//microtubule-based movement;cellular_component:GO:0005868//cytoplasmic dynein complex;molecular_function:GO:0003777//microtubule motor activity;
S.schlegelii_GLEAN_10011263	4.83334	4.33546	0.00244456	0.0309195	gi|734642670|ref|XP_010750281.1|/0/PREDICTED: UDP-N-acetylhexosamine pyrophosphorylase-like protein 1 isoform X4 [Larimichthys crocea]	Q7ZWD4/0.0/ UAP1L_DANRE UDP-N-acetylhexosamine pyrophosphorylase-like protein 1 OS=Danio rerio GN=uap1l1 PE=2 SV=1	lcf:108900752/0.0/UDP-N-acetylhexosamine pyrophosphorylase-like protein 1; K00972 UDP-N-acetylglucosamine/UDP-N-acetylgalactosamine diphosphorylase [EC:2.7.7.23 2.7.7.83]	biological_process:GO:0008152//metabolic process;molecular_function:GO:0070569//uridylyltransferase activity;
S.schlegelii_GLEAN_10012259	4.83335	4.33544	0.00235322	0.0309185	gi|808859593|gb|KKF11699.1|/0/Erythrocyte band 7 integral membrane protein [Larimichthys crocea]	P27105/4e-132/ STOM_HUMAN Erythrocyte band 7 integral membrane protein OS=Homo sapiens GN=STOM PE=1 SV=3	lco:104923823/0.0/erythrocyte band 7 integral membrane protein; K17286 erythrocyte band 7 integral membrane protein	cellular_component:GO:0016020//membrane;
S.schlegelii_GLEAN_10011952	4.83478	4.33609	0.00251754	0.0312001	gi|410908995|ref|XP_003967976.1|/0/PREDICTED: wiskott-Aldrich syndrome protein family member 3 [Takifugu rubripes]	Q9UPY6/3e-174/ WASF3_HUMAN Wiskott-Aldrich syndrome protein family member 3 OS=Homo sapiens GN=WASF3 PE=1 SV=2	lco:104924972/0.0/wasf3; WAS protein family member 3; K06083 WAS protein family, member 3	biological_process:GO:0030036//actin cytoskeleton organization;cellular_component:GO:0005856//cytoskeleton;molecular_function:GO:0003779//actin binding;
S.schlegelii_GLEAN_10014105	4.83502	4.33626	0.00245368	0.0309195	gi|584005952|ref|XP_006797965.1|/0/PREDICTED: importin subunit alpha-1-like [Neolamprologus brichardi]	P52293/0.0/ IMA1_MOUSE Importin subunit alpha-1 OS=Mus musculus GN=Kpna2 PE=1 SV=2	lcf:108898652/0.0/importin subunit alpha-1-like; K15043 importin subunit alpha-2	biological_process:GO:0006606//protein import into nucleus;cellular_component:GO:0005634//nucleus;GO:0005737//cytoplasm;molecular_function:GO:0005515//protein binding;GO:0008565//protein transporter activity;
S.schlegelii_GLEAN_10017074	4.83516	4.33612	0.00276173	0.0335228	gi|808859957|gb|KKF12034.1|/1.03679e-154/Homeobox protein DBX2 [Larimichthys crocea]	Q6ZNG2/5e-44/ DBX2_HUMAN Homeobox protein DBX2 OS=Homo sapiens GN=DBX2 PE=2 SV=2	nvl:108561904/1e-18/homeobox protein H2.0; K09339 homeobox protein HLX1	biological_process:GO:0006355//regulation of transcription, DNA-templated;molecular_function:GO:0003677//DNA binding;GO:0043565//sequence-specific DNA binding;
S.schlegelii_GLEAN_10009122	4.83556	4.33651	0.00244148	0.0309195	gi|642108631|emb|CDQ72378.1|/0/unnamed protein product [Oncorhynchus mykiss]	Q9WVH3/6e-123/ FOXO4_MOUSE Forkhead box protein O4 OS=Mus musculus GN=Foxo4 PE=1 SV=1	csem:103390850/0.0/foxo4; forkhead box protein O4 isoform X1; K12358 forkhead box protein O4	biological_process:GO:0006355//regulation of transcription, DNA-templated;molecular_function:GO:0003700//sequence-specific DNA binding transcription factor activity;GO:0043565//sequence-specific DNA binding;
S.schlegelii_GLEAN_10018093	4.83619	4.33681	0.00233376	0.0309185	gi|657572751|ref|XP_008290004.1|/1.1365e-128/PREDICTED: WAS/WASL-interacting protein family member 3-like [Stegastes partitus]	Q8TF74/2e-11/ WIPF2_HUMAN WAS/WASL-interacting protein family member 2 OS=Homo sapiens GN=WIPF2 PE=1 SV=1	lcf:108877121/1e-129/wipf3; WAS/WASL-interacting protein family member 3; K19475 WAS/WASL-interacting protein	molecular_function:GO:0003779//actin binding;
S.schlegelii_GLEAN_10013354	4.83705	4.33723	0.0024459	0.0309195	gi|657809778|ref|XP_008332181.1|/6.19621e-123/PREDICTED: prostaglandin F synthase-like [Cynoglossus semilaevis]	Q09632/8e-61/ YOF5_CAEEL Uncharacterized oxidoreductase ZK1290.5 OS=Caenorhabditis elegans GN=ZK1290.5 PE=3 SV=3	soc:105203033/2e-35/aldose reductase-like; K00011 aldehyde reductase [EC:1.1.1.21]	biological_process:GO:0055114//oxidation-reduction process;molecular_function:GO:0016491//oxidoreductase activity;
S.schlegelii_GLEAN_10023331	4.83837	4.33787	0.00240329	0.0309185	gi|734641161|ref|XP_010749452.1|/0/PREDICTED: AT-rich interactive domain-containing protein 5A isoform X1 [Larimichthys crocea]	Q3U108/2e-56/ ARI5A_MOUSE AT-rich interactive domain-containing protein 5A OS=Mus musculus GN=Arid5a PE=1 SV=1	aag:5571774/8e-16/AT-rich interactive domain-containing protein 4B isoform X3; K07874 Ras-related protein Rab-1A	molecular_function:GO:0003677//DNA binding;
S.schlegelii_GLEAN_10016767	4.83952	4.33841	0.00236755	0.0309185	gi|734631174|ref|XP_010743964.1|/1.77576e-150/PREDICTED: secretory carrier-associated membrane protein 4 [Larimichthys crocea] &gt;gi|734631176|ref|XP_010743965.1| PREDICTED: secretory carrier-associated membrane protein 4 [Larimichthys crocea]	Q5RCY9/3e-98/ SCAM4_PONAB Secretory carrier-associated membrane protein 4 OS=Pongo abelii GN=SCAMP4 PE=2 SV=1	lco:104930785/3e-151/scamp4; secretory carrier-associated membrane protein 4; K19995 secretory carrier-associated membrane protein	biological_process:GO:0015031//protein transport;cellular_component:GO:0016021//integral component of membrane;
S.schlegelii_GLEAN_10021716	4.84626	4.34165	0.00237477	0.0309185	gi|734624207|ref|XP_010740142.1|/0/PREDICTED: stomatin-like protein 2, mitochondrial [Larimichthys crocea]	Q4FZT0/9e-177/ STML2_RAT Stomatin-like protein 2, mitochondrial OS=Rattus norvegicus GN=Stoml2 PE=1 SV=1	dse:Dsec_GM16067/8e-113/Dsec\GM16067-PA; K03364 cell division cycle 20-like protein 1, cofactor of APC complex	cellular_component:GO:0016020//membrane;
S.schlegelii_GLEAN_10009508	4.84767	4.34233	0.00237563	0.0309185	gi|657789276|ref|XP_008321403.1|/0/PREDICTED: sphingosine kinase 2-like [Cynoglossus semilaevis]	Q9NRA0/4e-157/ SPHK2_HUMAN Sphingosine kinase 2 OS=Homo sapiens GN=SPHK2 PE=1 SV=2	csem:103388269/0.0/sphingosine kinase 2-like; K04718 sphingosine kinase [EC:2.7.1.91]	molecular_function:GO:0016301//kinase activity;
S.schlegelii_GLEAN_10008104	4.84839	4.34269	0.0023821	0.0309185	gi|657534653|ref|XP_008274172.1|/1.63613e-121/PREDICTED: immunoglobulin superfamily member 5-like isoform X4 [Stegastes partitus]	Q5VJ70/8e-12/ IGSF5_RAT Immunoglobulin superfamily member 5 OS=Rattus norvegicus GN=Igsf5 PE=1 SV=1	lcf:108873763/5e-121/LOW QUALITY PROTEIN: immunoglobulin superfamily member 5-like; K06786 junctional adhesion molecule 4	molecular_function:GO:0005515//protein binding;
S.schlegelii_GLEAN_10012914	4.84946	4.34319	0.00243157	0.0309195	gi|657531060|ref|XP_008300119.1|/0/PREDICTED: poly(ADP-ribose) glycohydrolase ARH3 [Stegastes partitus]	Q66HT8/2e-179/ ARHL2_DANRE Poly(ADP-ribose) glycohydrolase ARH3 OS=Danio rerio GN=adprhl2 PE=2 SV=2	lcf:108896146/0.0/adprhl2; poly(ADP-ribose) glycohydrolase ARH3; K11687 poly(ADP-ribose) glycohydrolase ARH3 [EC:3.2.1.143]	NA
S.schlegelii_GLEAN_10000106	4.85069	4.34376	0.00244957	0.0309195	gi|734633524|ref|XP_010745252.1|/1.29648e-96/PREDICTED: regulator of G-protein signaling 17-like [Larimichthys crocea]	Q9UGC6/2e-76/ RGS17_HUMAN Regulator of G-protein signaling 17 OS=Homo sapiens GN=RGS17 PE=1 SV=2	lco:104931845/9e-97/regulator of G-protein signaling 17-like; K16449 regulator of G-protein signaling	NA
S.schlegelii_GLEAN_10014212	4.85229	4.34455	0.00236712	0.0309185	gi|657546314|ref|XP_008278360.1|/0/PREDICTED: cyclin-T2 isoform X2 [Stegastes partitus]	Q7TQK0/0.0/ CCNT2_MOUSE Cyclin-T2 OS=Mus musculus GN=Ccnt2 PE=1 SV=1	lco:104923135/0.0/ccnt2; cyclin T2; K15188 cyclin T	biological_process:GO:0006351//transcription, DNA-templated;
S.schlegelii_GLEAN_10015683	4.85629	4.34649	0.00236676	0.0309185	gi|734633442|ref|XP_010745207.1|/0/PREDICTED: inositol polyphosphate 1-phosphatase isoform X1 [Larimichthys crocea]	P49441/1e-125/ INPP_HUMAN Inositol polyphosphate 1-phosphatase OS=Homo sapiens GN=INPP1 PE=1 SV=1	lcf:108898919/0.0/inpp1; inositol polyphosphate 1-phosphatase; K01107 inositol polyphosphate 1-phosphatase [EC:3.1.3.57]	biological_process:GO:0046854//phosphatidylinositol phosphorylation;
S.schlegelii_GLEAN_10006615	4.85715	4.34689	0.00246909	0.0309999	gi|808857655|gb|KKF10197.1|/0/Transitional endoplasmic reticulum ATPase [Larimichthys crocea]	Q7ZU99/0.0/ TERA_DANRE Transitional endoplasmic reticulum ATPase OS=Danio rerio GN=vcp PE=1 SV=1	lcf:108878173/0.0/vcp; transitional endoplasmic reticulum ATPase; K13525 transitional endoplasmic reticulum ATPase	molecular_function:GO:0005524//ATP binding;
S.schlegelii_GLEAN_10006880	4.85851	4.34756	0.00238473	0.0309185	gi|808872739|gb|KKF22139.1|/0/E3 ubiquitin-protein ligase RFWD3 [Larimichthys crocea]	Q6PCD5/0.0/ RFWD3_HUMAN E3 ubiquitin-protein ligase RFWD3 OS=Homo sapiens GN=RFWD3 PE=1 SV=3	lco:104934605/0.0/rfwd3; ring finger and WD repeat domain 3; K15691 E3 ubiquitin-protein ligase RFWD3 [EC:2.3.2.27]	molecular_function:GO:0005515//protein binding;
S.schlegelii_GLEAN_10006470	4.8586	4.34761	0.00234722	0.0309185	gi|808873040|gb|KKF22408.1|/0/RNA polymerase II-associated protein 3 [Larimichthys crocea]	Q5ZKQ3/0.0/ RPAP3_CHICK RNA polymerase II-associated protein 3 OS=Gallus gallus GN=RPAP3 PE=2 SV=1	cin:100180725/4e-61/RNA polymerase II-associated protein 3-like; K00237 succinate dehydrogenase (ubiquinone) membrane anchor subunit	molecular_function:GO:0005515//protein binding;
S.schlegelii_GLEAN_10007608	4.86002	4.3483	0.00123824	0.0175567	gi|432909254|ref|XP_004078142.1|/1.88176e-155/PREDICTED: tubulin polymerization-promoting protein [Oryzias latipes]	O94811/7e-99/ TPPP_HUMAN Tubulin polymerization-promoting protein OS=Homo sapiens GN=TPPP PE=1 SV=1	ncc:104948739/3e-100/centrosomal protein of 72 kDa-like; K16532 centrosomal protein CEP72	biological_process:GO:0001578//microtubule bundle formation;GO:0046785//microtubule polymerization;molecular_function:GO:0015631//tubulin binding;
S.schlegelii_GLEAN_10010467	4.86398	4.35022	0.00125025	0.0175567	gi|734634564|ref|XP_010745823.1|/8.54518e-171/PREDICTED: ras-related protein Rab-20 [Larimichthys crocea]	Q9NX57/1e-101/ RAB20_HUMAN Ras-related protein Rab-20 OS=Homo sapiens GN=RAB20 PE=1 SV=1	lco:104932338/1e-170/rab20; RAB20, member RAS oncogene family; K07911 Ras-related protein Rab-20	biological_process:GO:0007165//signal transduction;GO:0007264//small GTPase mediated signal transduction;GO:0015031//protein transport;cellular_component:GO:0005622//intracellular;GO:0016020//membrane;molecular_function:GO:0005525//GTP binding;
S.schlegelii_GLEAN_10017428	4.86758	4.35195	0.00123848	0.0175567	gi|734621898|ref|XP_010738868.1|/0/PREDICTED: cysteine protease ATG4D-like [Larimichthys crocea]	Q684M2/1e-177/ ATG4D_PIG Cysteine protease ATG4D OS=Sus scrofa GN=ATG4D PE=3 SV=1	lco:104926657/0.0/cysteine protease ATG4D-like; K08342 cysteine protease ATG4 [EC:3.4.22.-]	NA
S.schlegelii_GLEAN_10010447	4.86973	4.353	0.00125135	0.0175567	gi|808879753|gb|KKF27737.1|/0/Leucine-rich repeat-containing protein 58 [Larimichthys crocea]	Q32NT4/4e-168/ LRC58_XENLA Leucine-rich repeat-containing protein 58 OS=Xenopus laevis GN=lrrc58 PE=2 SV=1	crg:105330272/3e-23/leucine-rich repeat protein 1; K10348 LRR-repeat protein 1	molecular_function:GO:0005515//protein binding;
S.schlegelii_GLEAN_10009497	4.87044	4.35333	0.00122995	0.0175567	gi|734607826|ref|XP_010731130.1|/0/PREDICTED: cytochrome P450 11B, mitochondrial-like [Larimichthys crocea]	Q92104/2e-180/ CP11B_LITCT Cytochrome P450 11B, mitochondrial OS=Lithobates catesbeiana GN=CYP11B PE=2 SV=1	lcf:108885901/0.0/cytochrome P450 11B, mitochondrial; K00497 steroid 11beta-monooxygenase [EC:1.14.15.4]	biological_process:GO:0055114//oxidation-reduction process;molecular_function:GO:0005506//iron ion binding;GO:0016705//oxidoreductase activity, acting on paired donors, with incorporation or reduction of molecular oxygen;GO:0020037//heme binding;
S.schlegelii_GLEAN_10009220	4.87435	4.35524	0.00126169	0.0175608	gi|908516367|ref|XP_013130746.1|/0/PREDICTED: regulator of nonsense transcripts 3A isoform X1 [Oreochromis niloticus]	B0S733/0.0/ REN3A_DANRE Regulator of nonsense transcripts 3A OS=Danio rerio GN=upf3a PE=2 SV=2	lcf:108901251/0.0/upf3a; regulator of nonsense transcripts 3A isoform X1; K14328 regulator of nonsense transcripts 3	NA
S.schlegelii_GLEAN_10020627	4.875	4.35547	0.00142559	0.0192355	gi|831530086|ref|XP_012720704.1|/0/PREDICTED: acetyl-CoA acetyltransferase, mitochondrial [Fundulus heteroclitus]	Q6AZA0/0.0/ THIL_DANRE Acetyl-CoA acetyltransferase, mitochondrial OS=Danio rerio GN=acat1 PE=2 SV=1	lcf:108894025/0.0/acat1; acetyl-CoA acetyltransferase, mitochondrial; K00626 acetyl-CoA C-acetyltransferase [EC:2.3.1.9]	biological_process:GO:0008152//metabolic process;molecular_function:GO:0016747//transferase activity, transferring acyl groups other than amino-acyl groups;
S.schlegelii_GLEAN_10021805	4.87734	4.35668	0.00127513	0.0176234	gi|808858910|gb|KKF11216.1|/0/Alpha-methylacyl-CoA racemase [Larimichthys crocea]	O09174/0.0/ AMACR_MOUSE Alpha-methylacyl-CoA racemase OS=Mus musculus GN=Amacr PE=1 SV=4	lcf:108874111/0.0/amacr; alpha-methylacyl-CoA racemase; K01796 alpha-methylacyl-CoA racemase [EC:5.1.99.4]	molecular_function:GO:0003824//catalytic activity;
S.schlegelii_GLEAN_10006800	4.87738	4.35673	0.00126938	0.0175914	gi|808847654|gb|KKF08692.1|/2.60036e-174/Proteasome subunit alpha type-2 [Larimichthys crocea]	P25787/5e-165/ PSA2_HUMAN Proteasome subunit alpha type-2 OS=Homo sapiens GN=PSMA2 PE=1 SV=2	lcf:108888110/5e-175/psma2; proteasome subunit alpha type-2; K02726 20S proteasome subunit alpha 2 [EC:3.4.25.1]	biological_process:GO:0006511//ubiquitin-dependent protein catabolic process;GO:0051603//proteolysis involved in cellular protein catabolic process;cellular_component:GO:0005839//proteasome core complex;GO:0019773//proteasome core complex, alpha-subunit complex;molecular_function:GO:0004175//endopeptidase activity;GO:0004298//threonine-type endopeptidase activity;
S.schlegelii_GLEAN_10021101	4.87813	4.35708	0.00127303	0.0176234	gi|734618245|ref|XP_010736858.1|/0/PREDICTED: UPF0249 protein ydjC homolog isoform X3 [Larimichthys crocea] &gt;gi|734618247|ref|XP_010736860.1| PREDICTED: UPF0249 protein ydjC homolog isoform X3 [Larimichthys crocea] &gt;gi|734618249|ref|XP_010736861.1| PREDICTED: UPF0249 protein ydjC homolog isoform X3 [Larimichthys crocea]	A2BIR6/6e-156/ YDJC_DANRE Carbohydrate deacetylase OS=Danio rerio GN=ydjc PE=3 SV=1	NA	NA
S.schlegelii_GLEAN_10007663	4.87841	4.35714	0.00132606	0.0181223	gi|734595788|ref|XP_010733446.1|/0/PREDICTED: sialic acid synthase [Larimichthys crocea] &gt;gi|734595790|ref|XP_010733454.1| PREDICTED: sialic acid synthase [Larimichthys crocea]	Q9NR45/0.0/ SIAS_HUMAN Sialic acid synthase OS=Homo sapiens GN=NANS PE=1 SV=2	lco:104922341/0.0/nans; N-acetylneuraminate synthase; K05304 sialic acid synthase [EC:2.5.1.56 2.5.1.57 2.5.1.132]	biological_process:GO:0016051//carbohydrate biosynthetic process;
S.schlegelii_GLEAN_10009362	4.87921	4.35761	0.00123826	0.0175567	gi|542258994|ref|XP_005464745.1|/0/PREDICTED: LOW QUALITY PROTEIN: myotonin-protein kinase [Oreochromis niloticus]	P54265/2e-173/ DMPK_MOUSE Myotonin-protein kinase OS=Mus musculus GN=Dmpk PE=1 SV=1	lcf:108900079/0.0/myotonin-protein kinase-like isoform X1; K08788 dystrophia myotonica-protein kinase [EC:2.7.11.1]	biological_process:GO:0006468//protein phosphorylation;GO:0031532//actin cytoskeleton reorganization;molecular_function:GO:0004672//protein kinase activity;GO:0004674//protein serine/threonine kinase activity;GO:0005524//ATP binding;
S.schlegelii_GLEAN_10024101	4.88091	4.35843	0.00120864	0.0175567	gi|928008944|ref|XP_013858008.1|/0/PREDICTED: GTP-binding protein 2-like [Austrofundulus limnaeus]	Q3UJK4/0.0/ GTPB2_MOUSE GTP-binding protein 2 OS=Mus musculus GN=Gtpbp2 PE=1 SV=1	lcf:108895022/3e-17/LOW QUALITY PROTEIN: elongation factor 1-alpha-like; K03231 elongation factor 1-alpha	molecular_function:GO:0003924//GTPase activity;GO:0005525//GTP binding;
S.schlegelii_GLEAN_10013142	4.88146	4.35871	0.00124066	0.0175567	gi|734630437|ref|XP_010743557.1|/0/PREDICTED: tripartite motif-containing protein 16-like [Larimichthys crocea]	Q99PP9/1e-41/ TRI16_MOUSE Tripartite motif-containing protein 16 OS=Mus musculus GN=Trim16 PE=1 SV=2	lco:104930458/0.0/tripartite motif-containing protein 16-like; K10652 tripartite motif-containing protein 25 [EC:2.3.2.27]	cellular_component:GO:0005622//intracellular;molecular_function:GO:0005515//protein binding;GO:0008270//zinc ion binding;
S.schlegelii_GLEAN_10006488	4.88149	4.35872	0.00125154	0.0175567	gi|657541878|ref|XP_008276763.1|/0/PREDICTED: neurofilament light polypeptide-like isoform X1 [Stegastes partitus]	Q2NL23/1e-08/ CC107_BOVIN Coiled-coil domain-containing protein 107 OS=Bos taurus GN=CCDC107 PE=2 SV=1	NA	NA
S.schlegelii_GLEAN_10016541	4.88156	4.35876	0.00126537	0.0175608	gi|736164669|ref|XP_010764175.1|/0/PREDICTED: transmembrane protein 120A-like [Notothenia coriiceps]	A3KNK1/2e-167/ T120A_DANRE Transmembrane protein 120A OS=Danio rerio GN=tmem120a PE=2 SV=1	spu:588956/2e-82/transmembrane protein 120A; K14574 ribosome maturation protein SDO1	cellular_component:GO:0016021//integral component of membrane;
S.schlegelii_GLEAN_10019529	4.88264	4.35928	0.00124612	0.0175567	gi|736310018|ref|XP_010795695.1|/0/PREDICTED: lactase-like protein [Notothenia coriiceps]	Q6UWM7/0.0/ LCTL_HUMAN Lactase-like protein OS=Homo sapiens GN=LCTL PE=1 SV=2	spu:587972/0.0/lactase-like protein; K01229 lactase-phlorizin hydrolase [EC:3.2.1.108 3.2.1.62]	biological_process:GO:0005975//carbohydrate metabolic process;molecular_function:GO:0004553//hydrolase activity, hydrolyzing O-glycosyl compounds;
S.schlegelii_GLEAN_10008422	4.88598	4.36092	0.0012416	0.0175567	gi|808882425|gb|KKF29816.1|/0/ATP synthase mitochondrial F1 complex assembly factor 2 [Larimichthys crocea]	Q91YY4/3e-137/ ATPF2_MOUSE ATP synthase mitochondrial F1 complex assembly factor 2 OS=Mus musculus GN=Atpaf2 PE=1 SV=1	lcf:108890771/0.0/atpaf2; ATP synthase mitochondrial F1 complex assembly factor 2; K07556 ATP synthase mitochondrial F1 complex assembly factor 2	biological_process:GO:0043461//proton-transporting ATP synthase complex assembly;
S.schlegelii_GLEAN_10023607	4.88813	4.36196	0.0012647	0.0175608	gi|736278913|ref|XP_010790425.1|/0/PREDICTED: major facilitator superfamily domain-containing protein 10 [Notothenia coriiceps] &gt;gi|736279050|ref|XP_010790426.1| PREDICTED: major facilitator superfamily domain-containing protein 10 [Notothenia coriiceps]	Q0P5M9/9e-161/ MFS10_BOVIN Major facilitator superfamily domain-containing protein 10 OS=Bos taurus GN=MFSD10 PE=2 SV=1	ccar:109106597/2e-107/uncharacterized protein LOC109106597; K05202 glutamate receptor, ionotropic kainate 2	biological_process:GO:0055085//transmembrane transport;cellular_component:GO:0016021//integral component of membrane;molecular_function:GO:0005215//transporter activity;
S.schlegelii_GLEAN_10013825	4.88893	4.36235	0.00122463	0.0175567	gi|736188484|ref|XP_010770720.1|/0/PREDICTED: endonuclease III-like protein 1 [Notothenia coriiceps]	P78549/8e-121/ NTH_HUMAN Endonuclease III-like protein 1 OS=Homo sapiens GN=NTHL1 PE=1 SV=2	lcf:108875624/0.0/nthl1; LOW QUALITY PROTEIN: endonuclease III-like protein 1; K10773 endonuclease III [EC:4.2.99.18]	biological_process:GO:0006284//base-excision repair;molecular_function:GO:0003677//DNA binding;
S.schlegelii_GLEAN_10023003	4.88939	4.36258	0.00126168	0.0175608	gi|808860075|gb|KKF12134.1|/2.2855e-152/Ubiquitin thioesterase OTUB2 [Larimichthys crocea]	Q9CQX0/4e-69/ OTUB2_MOUSE Ubiquitin thioesterase OTUB2 OS=Mus musculus GN=Otub2 PE=1 SV=1	lco:104921398/4e-153/otub2; OTU deubiquitinase, ubiquitin aldehyde binding 2; K09603 ubiquitin thioesterase protein OTUB2 [EC:3.4.19.12]	biological_process:GO:0016579//protein deubiquitination;molecular_function:GO:0016787//hydrolase activity;
S.schlegelii_GLEAN_10012327	4.89	4.36289	0.00121106	0.0175567	gi|657581560|ref|XP_008294803.1|/0/PREDICTED: gamma-aminobutyric acid receptor subunit rho-3-like isoform X1 [Stegastes partitus]	A8MPY1/0.0/ GBRR3_HUMAN Gamma-aminobutyric acid receptor subunit rho-3 OS=Homo sapiens GN=GABRR3 PE=3 SV=2	tru:101072487/0.0/gamma-aminobutyric acid receptor subunit rho-3-like; K05190 gamma-aminobutyric acid receptor subunit rho	biological_process:GO:0006810//transport;GO:0006811//ion transport;cellular_component:GO:0016020//membrane;GO:0016021//integral component of membrane;molecular_function:GO:0005230//extracellular ligand-gated ion channel activity;
S.schlegelii_GLEAN_10005793	4.89101	4.36336	0.00122273	0.0175567	gi|657574160|ref|XP_008290774.1|/1.44809e-122/PREDICTED: interleukin-18 receptor 1-like [Stegastes partitus]	Q13478/3e-27/ IL18R_HUMAN Interleukin-18 receptor 1 OS=Homo sapiens GN=IL18R1 PE=1 SV=1	lcf:108887958/1e-120/interleukin-18 receptor 1-like; K05173 interleukin 18 receptor 1	biological_process:GO:0007165//signal transduction;molecular_function:GO:0005515//protein binding;
S.schlegelii_GLEAN_10003530	4.89116	4.36352	0.00134719	0.0183388	gi|736198050|ref|XP_010773580.1|/0/PREDICTED: transmembrane protein 43 [Notothenia coriiceps]	Q9BTV4/3e-167/ TMM43_HUMAN Transmembrane protein 43 OS=Homo sapiens GN=TMEM43 PE=1 SV=1	NA	NA
S.schlegelii_GLEAN_10020620	4.89213	4.3639	0.00129956	0.0178326	gi|657568806|ref|XP_008287853.1|/0/PREDICTED: 52 kDa repressor of the inhibitor of the protein kinase isoform X1 [Stegastes partitus]	O43422/0.0/ P52K_HUMAN 52 kDa repressor of the inhibitor of the protein kinase OS=Homo sapiens GN=THAP12 PE=1 SV=2	zne:110828697/4e-07/zinc finger protein 226-like; K09228 KRAB domain-containing zinc finger protein	molecular_function:GO:0003676//nucleic acid binding;
S.schlegelii_GLEAN_10001959	4.89372	4.3647	0.00120982	0.0175567	gi|908513402|ref|XP_013129083.1|/0/PREDICTED: nuclear receptor subfamily 4 group A member 1-like [Oreochromis niloticus]	P62510/2e-143/ ERR3_RAT Estrogen-related receptor gamma OS=Rattus norvegicus GN=Esrrg PE=2 SV=1	lcf:108892719/0.0/estrogen-related receptor gamma-like; K08554 estrogen-related receptor gamma	biological_process:GO:0006355//regulation of transcription, DNA-templated;GO:0043401//steroid hormone mediated signaling pathway;cellular_component:GO:0005634//nucleus;molecular_function:GO:0003677//DNA binding;GO:0003700//sequence-specific DNA binding transcription factor activity;GO:0003707//steroid hormone receptor activity;GO:0008270//zinc ion binding;GO:0043565//sequence-specific DNA binding;
S.schlegelii_GLEAN_10011247	4.89602	4.36582	0.00127678	0.0176303	gi|657564602|ref|XP_008285558.1|/0/PREDICTED: cyclin-dependent kinase 9 isoform X1 [Stegastes partitus]	Q5ZKN1/0.0/ CDK9_CHICK Cyclin-dependent kinase 9 OS=Gallus gallus GN=CDK9 PE=2 SV=1	mze:101485106/0.0/cdk9; cyclin dependent kinase 9; K02211 cyclin-dependent kinase 9 [EC:2.7.11.22 2.7.11.23]	biological_process:GO:0006468//protein phosphorylation;molecular_function:GO:0004672//protein kinase activity;GO:0005524//ATP binding;
S.schlegelii_GLEAN_10021785	4.905	4.37024	0.00123962	0.0175567	gi|808871116|gb|KKF20868.1|/2.90583e-115/Proprotein convertase subtilisin/kexin type 5 [Larimichthys crocea]	Q04592/3e-62/ PCSK5_MOUSE Proprotein convertase subtilisin/kexin type 5 OS=Mus musculus GN=Pcsk5 PE=1 SV=3	lcf:108874103/2e-115/LOW QUALITY PROTEIN: proprotein convertase subtilisin/kexin type 5-like; K08654 proprotein convertase subtilisin/kexin type 5 [EC:3.4.21.-]	biological_process:GO:0006508//proteolysis;molecular_function:GO:0004252//serine-type endopeptidase activity;
S.schlegelii_GLEAN_10011790	4.90508	4.37029	0.00128093	0.017656	gi|808878788|gb|KKF27002.1|/7.11744e-125/Protein Dr1 [Larimichthys crocea]	Q5XI68/1e-90/ NC2B_RAT Protein Dr1 OS=Rattus norvegicus GN=Dr1 PE=2 SV=1	lcf:108878985/1e-125/dr1; protein Dr1; K21751 down-regulator of transcription 1	NA
S.schlegelii_GLEAN_10016911	4.91461	4.37496	0.00122257	0.0175567	gi|808860033|gb|KKF12096.1|/0/Paxillin [Larimichthys crocea]	O60711/1e-130/ LPXN_HUMAN Leupaxin OS=Homo sapiens GN=LPXN PE=1 SV=1	lcf:108877413/0.0/leupaxin-like; K05760 paxillin	molecular_function:GO:0008270//zinc ion binding;
S.schlegelii_GLEAN_10011305	4.91503	4.37517	0.00134691	0.0183388	gi|410903219|ref|XP_003965091.1|/0/PREDICTED: target of rapamycin complex 2 subunit MAPKAP1 isoform X2 [Takifugu rubripes]	Q9W6S3/0.0/ SIN1_CHICK Target of rapamycin complex 2 subunit MAPKAP1 OS=Gallus gallus GN=MAPKAP1 PE=2 SV=1	tru:101074258/0.0/mapkap1; mitogen-activated protein kinase associated protein 1; K20410 target of rapamycin complex 2 subunit MAPKAP1	cellular_component:GO:0031932//TORC2 complex;
S.schlegelii_GLEAN_10000226	4.91534	4.37537	0.00135622	0.0184127	gi|808879928|gb|KKF27902.1|/0/7SK snRNA methylphosphate capping enzyme [Larimichthys crocea]	A3KQ55/2e-125/ MEPCE_DANRE 7SK snRNA methylphosphate capping enzyme OS=Danio rerio GN=mepce PE=3 SV=2	lco:104936943/0.0/mepce; methylphosphate capping enzyme; K15190 7SK snRNA methylphosphate capping enzyme [EC:2.1.1.-]	biological_process:GO:0000154//rRNA modification;molecular_function:GO:0000179//rRNA (adenine-N6,N6-)-dimethyltransferase activity;GO:0008168//methyltransferase activity;GO:0008649//rRNA methyltransferase activity;
S.schlegelii_GLEAN_10020750	4.91631	4.37579	0.00122719	0.0175567	gi|657579064|ref|XP_008293435.1|/0/PREDICTED: myelin proteolipid protein-like isoform X1 [Stegastes partitus]	P79826/4e-142/ MYPR_ONCMY Myelin proteolipid protein OS=Oncorhynchus mykiss GN=plp PE=2 SV=1	sasa:106604242/2e-126/myelin proteolipid protein-like; K17271 myelin proteolipid protein	cellular_component:GO:0016021//integral component of membrane;
S.schlegelii_GLEAN_10018852	4.91739	4.37633	0.00125429	0.0175567	gi|808866698|gb|KKF17370.1|/8.04924e-160/Poly [ADP-ribose] polymerase 11 [Larimichthys crocea]	Q8K3Y6/3e-12/ ZCCHV_RAT Zinc finger CCCH-type antiviral protein 1 OS=Rattus norvegicus GN=Zc3hav1 PE=1 SV=1	xma:102234909/4e-15/poly [ADP-ribose] polymerase 12-like; K15259 poly [ADP-ribose] polymerase 7/11/12/13 [EC:2.4.2.30]	molecular_function:GO:0046872//metal ion binding;
S.schlegelii_GLEAN_10009161	4.91784	4.3766	0.00135395	0.0184021	gi|939297726|ref|XP_014267251.1|/9.03328e-105/PREDICTED: RNA-directed DNA polymerase from mobile element jockey-like [Maylandia zebra]	NA	ncc:104952435/7e-11/uncharacterized protein LOC104952435; K11647 SWI/SNF-related matrix-associated actin-dependent regulator of chromatin subfamily A member 2/4 [EC:3.6.4.-]	molecular_function:GO:0004386//helicase activity;GO:0005524//ATP binding;
S.schlegelii_GLEAN_10022815	4.91886	4.37706	0.00122995	0.0175567	gi|229366886|gb|ACQ58423.1|/0/Peptidyl-prolyl cis-trans isomerase E [Anoplopoma fimbria]	Q9UNP9/0.0/ PPIE_HUMAN Peptidyl-prolyl cis-trans isomerase E OS=Homo sapiens GN=PPIE PE=1 SV=1	lco:104919330/0.0/ppie; peptidylprolyl isomerase E; K09564 peptidyl-prolyl isomerase E (cyclophilin E) [EC:5.2.1.8]	biological_process:GO:0000413//protein peptidyl-prolyl isomerization;GO:0006457//protein folding;molecular_function:GO:0003676//nucleic acid binding;GO:0003755//peptidyl-prolyl cis-trans isomerase activity;
S.schlegelii_GLEAN_10022526	4.91954	4.37727	0.0014246	0.0192355	gi|808858035|gb|KKF10501.1|/0/Protein atonal [Larimichthys crocea]	D2CLZ9/3e-61/ ATOH8_DANRE Protein atonal homolog 8 OS=Danio rerio GN=atoh8 PE=2 SV=1	lco:104937159/0.0/atoh8; atonal bHLH transcription factor 8; K09084 atonal protein 8	biological_process:GO:0006355//regulation of transcription, DNA-templated;GO:0030154//cell differentiation;molecular_function:GO:0003700//sequence-specific DNA binding transcription factor activity;GO:0046983//protein dimerization activity;
S.schlegelii_GLEAN_10004884	4.92497	4.38008	0.0012572	0.0175608	gi|734630029|ref|XP_010743335.1|/0/PREDICTED: spindle assembly checkpoint kinase-like [Larimichthys crocea]	P54665/1e-18/ CC2H2_TRYBB Cell division control protein 2 homolog 2 OS=Trypanosoma brucei brucei GN=CRK2 PE=3 SV=1	mze:101478955/0.0/cyclin-dependent kinase 3-like; K08829 male germ cell-associated kinase [EC:2.7.11.22]	biological_process:GO:0006468//protein phosphorylation;molecular_function:GO:0004672//protein kinase activity;GO:0005524//ATP binding;
S.schlegelii_GLEAN_10022777	4.92533	4.38038	0.00139209	0.0188331	gi|734613991|ref|XP_010734528.1|/0/PREDICTED: uncharacterized protein LOC104923197 [Larimichthys crocea] &gt;gi|808867289|gb|KKF17869.1| hypothetical protein EH28_03802 [Larimichthys crocea]	NA	NA	NA
S.schlegelii_GLEAN_10010301	4.9259	4.38051	0.00131407	0.0180157	gi|736175005|ref|XP_010766968.1|/0/PREDICTED: F-box only protein 4 [Notothenia coriiceps]	Q8CHQ0/1e-111/ FBX4_MOUSE F-box only protein 4 OS=Mus musculus GN=Fbxo4 PE=1 SV=2	ncc:104943310/0.0/fbxo4; F-box only protein 4; K10291 F-box protein 4	molecular_function:GO:0005515//protein binding;
S.schlegelii_GLEAN_10022936	4.92688	4.38102	0.00128725	0.0177192	gi|808885733|gb|KKF32434.1|/0/Protein angel [Larimichthys crocea]	B2RYM0/2e-129/ ANGE1_RAT Protein angel homolog 1 OS=Rattus norvegicus GN=Angel1 PE=1 SV=2	lcf:108892493/0.0/angel1; protein angel homolog 1; K18729 protein angel	NA
S.schlegelii_GLEAN_10016118	4.93027	4.38305	0.00158711	0.0213211	gi|583988477|ref|XP_006789459.1|/0/PREDICTED: synaptotagmin-1-like [Neolamprologus brichardi]	Q5R4J5/6e-176/ SYT1_PONAB Synaptotagmin-1 OS=Pongo abelii GN=SYT1 PE=2 SV=1	lcf:108875169/0.0/synaptotagmin-1-like; K15290 synaptotagmin-1	cellular_component:GO:0016020//membrane;molecular_function:GO:0005515//protein binding;
S.schlegelii_GLEAN_10007536	4.93064	4.3829	0.00122683	0.0175567	gi|736250843|ref|XP_010787984.1|/0/PREDICTED: zinc finger and BTB domain-containing protein 32 [Notothenia coriiceps] &gt;gi|736250846|ref|XP_010787985.1| PREDICTED: zinc finger and BTB domain-containing protein 32 [Notothenia coriiceps]	Q802Y8/3e-51/ ZB16A_DANRE Zinc finger and BTB domain-containing protein 16-A OS=Danio rerio GN=zbtb16a PE=1 SV=1	lco:104925517/0.0/zbtb32; zinc finger and BTB domain-containing protein 16-A; K10055 zinc finger and BTB domain-containing protein 16	molecular_function:GO:0005515//protein binding;GO:0046872//metal ion binding;
S.schlegelii_GLEAN_10009594	4.93304	4.38409	0.00136312	0.0184736	gi|734627076|ref|XP_010741709.1|/0/PREDICTED: tapasin-related protein isoform X2 [Larimichthys crocea]	Q9BX59/8e-64/ TPSNR_HUMAN Tapasin-related protein OS=Homo sapiens GN=TAPBPL PE=1 SV=2	cmk:103191457/8e-35/tapasin-like; K08058 TAP binding protein (tapasin)	biological_process:GO:0019885//antigen processing and presentation of endogenous peptide antigen via MHC class I;cellular_component:GO:0016020//membrane;molecular_function:GO:0005515//protein binding;
S.schlegelii_GLEAN_10018065	4.93324	4.38415	0.00129836	0.0178321	gi|808878182|gb|KKF26458.1|/0/CAS1 domain-containing protein 1 [Larimichthys crocea]	Q1LW89/0.0/ CASD1_DANRE N-acetylneuraminate 9-O-acetyltransferase OS=Danio rerio GN=casd1 PE=2 SV=2	lco:104922871/0.0/casd1; CAS1 domain containing 1; K03377 N-acetylneuraminate 9-O-acetyltransferase [EC:2.3.1.45]	NA
S.schlegelii_GLEAN_10021993	4.93402	4.38449	0.00131843	0.0180594	gi|808870803|gb|KKF20592.1|/0/Eukaryotic translation initiation factor 3 subunit F [Larimichthys crocea] &gt;gi|808875763|gb|KKF24503.1| Eukaryotic translation initiation factor 3 subunit F [Larimichthys crocea]	Q4R5B8/2e-161/ EIF3F_MACFA Eukaryotic translation initiation factor 3 subunit F OS=Macaca fascicularis GN=EIF3F PE=2 SV=1	lco:109140914/0.0/eukaryotic translation initiation factor 3 subunit F-like; K03249 translation initiation factor 3 subunit F	molecular_function:GO:0005515//protein binding;
S.schlegelii_GLEAN_10006465	4.93443	4.38463	0.00135424	0.0184021	gi|657555048|ref|XP_008282001.1|/0/PREDICTED: sarcalumenin isoform X1 [Stegastes partitus]	Q7TQ48/0.0/ SRCA_MOUSE Sarcalumenin OS=Mus musculus GN=Srl PE=1 SV=1	epa:110233290/3e-60/EH domain-containing protein 3-like; K12476 EH domain-containing protein 3	molecular_function:GO:0005525//GTP binding;
S.schlegelii_GLEAN_10002850	4.9347	4.38491	0.00125012	0.0175567	gi|328677201|gb|AEB31323.1|/1.05745e-145/hypothetical protein, partial [Epinephelus bruneus]	P11842/2e-109/ CRBA4_BOVIN Beta-crystallin A4 OS=Bos taurus GN=CRYBA4 PE=1 SV=3	bacu:103015945/6e-20/TBCCD1; TBCC domain containing 1; K16810 TBCC domain-containing protein 1	NA
S.schlegelii_GLEAN_10003964	4.93506	4.38515	0.00134361	0.0183225	gi|734628936|ref|XP_010742729.1|/0/PREDICTED: zona pellucida sperm-binding protein 3-like [Larimichthys crocea]	P79762/3e-60/ ZP3_CHICK Zona pellucida sperm-binding protein 3 OS=Gallus gallus GN=ZP3 PE=1 SV=4	lcf:108880306/0.0/zona pellucida sperm-binding protein 3-like; K19928 zona pellucida sperm-binding protein 3	NA
S.schlegelii_GLEAN_10011215	4.93716	4.38613	0.00125063	0.0175567	gi|408689299|gb|AFU81223.1|/0/complement component 9 [Oplegnathus fasciatus]	P79755/0.0/ CO9_TAKRU Complement component C9 OS=Takifugu rubripes GN=c9 PE=3 SV=1	tru:101068974/0.0/c9; complement C9; K04000 complement component 9	biological_process:GO:0006955//immune response;cellular_component:GO:0005579//membrane attack complex;molecular_function:GO:0005515//protein binding;
S.schlegelii_GLEAN_10018765	4.9385	4.38678	0.00122312	0.0175567	gi|808874835|gb|KKF23827.1|/0/Anoctamin-6 [Larimichthys crocea]	Q6P9J9/0.0/ ANO6_MOUSE Anoctamin-6 OS=Mus musculus GN=Ano6 PE=1 SV=1	lco:104932588/0.0/ano6; anoctamin 6; K19500 anoctamin-6	biological_process:GO:0002407//dendritic cell chemotaxis;GO:0007596//blood coagulation;GO:0030501//positive regulation of bone mineralization;GO:0034767//positive regulation of ion transmembrane transport;GO:0061588//calcium activated phospholipid scrambling;GO:1902476//chloride transmembrane transport;molecular_function:GO:0046983//protein dimerization activity;
S.schlegelii_GLEAN_10003451	4.93974	4.38741	0.00124459	0.0175567	gi|734645478|ref|XP_010751831.1|/0/PREDICTED: general transcription factor 3C polypeptide 3 [Larimichthys crocea]	Q9Y5Q9/0.0/ TF3C3_HUMAN General transcription factor 3C polypeptide 3 OS=Homo sapiens GN=GTF3C3 PE=1 SV=1	lco:104937322/0.0/gtf3c3; general transcription factor IIIC subunit 3; K15201 general transcription factor 3C polypeptide 3 (transcription factor C subunit 4)	molecular_function:GO:0005515//protein binding;
S.schlegelii_GLEAN_10018812	4.94073	4.3879	0.00125851	0.0175608	gi|736238956|ref|XP_010784385.1|/0/PREDICTED: mesoderm-specific transcript homolog protein isoform X2 [Notothenia coriiceps]	Q5EB52/1e-167/ MEST_HUMAN Mesoderm-specific transcript homolog protein OS=Homo sapiens GN=MEST PE=2 SV=2	NA	molecular_function:GO:0003824//catalytic activity;
S.schlegelii_GLEAN_10009730	4.94173	4.3884	0.00125415	0.0175567	gi|808872919|gb|KKF22307.1|/4.70466e-139/Ras-related protein Rab-19 [Larimichthys crocea]	A4D1S5/7e-102/ RAB19_HUMAN Ras-related protein Rab-19 OS=Homo sapiens GN=RAB19 PE=2 SV=2	lco:104934074/9e-140/ras-related protein Rab-19; K17047 Ras-related protein Rab-19	biological_process:GO:0006886//intracellular protein transport;GO:0006913//nucleocytoplasmic transport;GO:0007165//signal transduction;GO:0007264//small GTPase mediated signal transduction;GO:0015031//protein transport;cellular_component:GO:0005622//intracellular;GO:0016020//membrane;molecular_function:GO:0003924//GTPase activity;GO:0005525//GTP binding;
S.schlegelii_GLEAN_10003542	4.94273	4.38889	0.00127451	0.0176234	gi|736198076|ref|XP_010773594.1|/1.75869e-168/PREDICTED: adaptin ear-binding coat-associated protein 2 [Notothenia coriiceps]	Q5R630/2e-113/ NECP1_PONAB Adaptin ear-binding coat-associated protein 1 OS=Pongo abelii GN=NECAP1 PE=2 SV=1	ncc:104949015/3e-169/necap2; adaptin ear-binding coat-associated protein 2; K20069 adaptin ear-binding coat-associated protein 1/2	biological_process:GO:0006897//endocytosis;cellular_component:GO:0016020//membrane;
S.schlegelii_GLEAN_10015242	4.94404	4.38953	0.00122931	0.0175567	gi|808884711|gb|KKF31614.1|/3.50738e-79/DnaJ [Larimichthys crocea]	Q0VBY7/1e-33/ DJC24_BOVIN DnaJ homolog subfamily C member 24 OS=Bos taurus GN=DNAJC24 PE=2 SV=2	lcf:108884608/2e-81/dnajc24; dnaJ homolog subfamily C member 24 isoform X1; K17867 diphthamide biosynthesis protein 4	NA
S.schlegelii_GLEAN_10001856	4.9515	4.39327	0.00123621	0.0175567	gi|734645021|ref|XP_010751579.1|/4.91697e-149/PREDICTED: uncharacterized protein LOC104937124 [Larimichthys crocea]	P04942/2e-09/ KV6A8_MOUSE Ig kappa chain V-VI region NQ5-61.1.2 OS=Mus musculus PE=2 SV=1	mze:101486288/2e-66/uncharacterized LOC101486288; K16826 signal-regulatory protein beta 2	molecular_function:GO:0005515//protein binding;
S.schlegelii_GLEAN_10005900	4.95222	4.39372	0.00138087	0.0186978	gi|808872037|gb|KKF21593.1|/1.2945e-153/Protein FAM57A [Larimichthys crocea]	Q71RH2/2e-81/ FA57B_HUMAN Protein FAM57B OS=Homo sapiens GN=FAM57B PE=2 SV=1	aml:100477596/6e-44/DOC2A; double C2 domain alpha; K19916 double C2-like domain-containing protein alpha	cellular_component:GO:0016021//integral component of membrane;
S.schlegelii_GLEAN_10008139	4.95289	4.39397	0.00124593	0.0175567	gi|431836474|gb|AGA93878.1|/0/RhAG [Porichthys notatus]	Q02094/0.0/ RHAG_HUMAN Ammonium transporter Rh type A OS=Homo sapiens GN=RHAG PE=1 SV=2	hcq:109508057/0.0/rhag; ammonium transporter Rh type A; K06580 ammonium transporter Rh	biological_process:GO:0015696//ammonium transport;GO:0072488//ammonium transmembrane transport;cellular_component:GO:0016020//membrane;molecular_function:GO:0008519//ammonium transmembrane transporter activity;
S.schlegelii_GLEAN_10006755	4.95313	4.3941	0.00132033	0.0180692	gi|317419677|emb|CBN81714.1|/0/Tubulin polyglutamylase ttll6 [Dicentrarchus labrax]	A8CVX7/0.0/ TTLL6_DANRE Tubulin polyglutamylase ttll6 OS=Danio rerio GN=ttll6 PE=2 SV=1	ncc:104945484/0.0/ttll6; tubulin polyglutamylase TTLL6; K16582 tubulin polyglutamylase TTLL6/13 [EC:6.-.-.-]	biological_process:GO:0006464//cellular protein modification process;
S.schlegelii_GLEAN_10010761	4.9547	4.39488	0.00121973	0.0175567	gi|542241459|ref|XP_003453238.2|/0/PREDICTED: D-beta-hydroxybutyrate dehydrogenase, mitochondrial-like [Oreochromis niloticus]	Q80XN0/8e-65/ BDH_MOUSE D-beta-hydroxybutyrate dehydrogenase, mitochondrial OS=Mus musculus GN=Bdh1 PE=1 SV=2	mze:101487783/0.0/D-beta-hydroxybutyrate dehydrogenase, mitochondrial-like; K00019 3-hydroxybutyrate dehydrogenase [EC:1.1.1.30]	biological_process:GO:0008152//metabolic process;molecular_function:GO:0016491//oxidoreductase activity;
S.schlegelii_GLEAN_10007402	4.95689	4.39597	0.00126603	0.0175608	gi|734633540|ref|XP_010745261.1|/0/PREDICTED: abhydrolase domain-containing protein 4 [Larimichthys crocea]	Q8VD66/3e-139/ ABHD4_MOUSE Protein ABHD4 OS=Mus musculus GN=Abhd4 PE=1 SV=1	lco:104931854/0.0/abhd4; abhydrolase domain containing 4; K13698 abhydrolase domain-containing protein 4	NA
S.schlegelii_GLEAN_10021698	4.95821	4.39663	0.00121766	0.0175567	gi|808872309|gb|KKF21780.1|/1.57307e-78/UPF0414 transmembrane protein [Larimichthys crocea]	Q5ZLH4/8e-59/ TM230_CHICK Transmembrane protein 230 OS=Gallus gallus GN=TMEM230 PE=2 SV=1	NA	NA
S.schlegelii_GLEAN_10015947	4.95929	4.39717	0.00126249	0.0175608	gi|808884938|gb|KKF31813.1|/9.82271e-128/Serine/arginine-rich splicing factor 4 [Larimichthys crocea]	Q8VE97/3e-104/ SRSF4_MOUSE Serine/arginine-rich splicing factor 4 OS=Mus musculus GN=Srsf4 PE=2 SV=1	lco:104937358/9e-130/serine/arginine-rich splicing factor 6-like; K12893 splicing factor, arginine/serine-rich 4/5/6	molecular_function:GO:0003676//nucleic acid binding;
S.schlegelii_GLEAN_10016743	4.96132	4.39819	0.00125282	0.0175567	gi|808863305|gb|KKF14682.1|/0/Protein zyg-11 [Larimichthys crocea] &gt;gi|808863309|gb|KKF14686.1| Protein zyg-11 [Larimichthys crocea]	Q5TYQ1/0.0/ ZYG11_DANRE Protein zyg-11 homolog OS=Danio rerio GN=zyg11 PE=2 SV=1	lco:109142494/0.0/protein zyg-11 homolog; K10350 Zyg-11 protein homolog	molecular_function:GO:0005515//protein binding;
S.schlegelii_GLEAN_10007931	4.96136	4.39821	0.00123589	0.0175567	gi|229365996|gb|ACQ57978.1|/9.28567e-132/Williams-Beuren syndrome chromosomal region 27 protein [Anoplopoma fimbria]	Q8N6F8/3e-58/ MET27_HUMAN Methyltransferase-like protein 27 OS=Homo sapiens GN=METTL27 PE=1 SV=2	NA	NA
S.schlegelii_GLEAN_10006666	4.96597	4.40051	0.00120966	0.0175567	gi|542239252|ref|XP_005457213.1|/0/PREDICTED: NXPE family member 3-like isoform X3 [Oreochromis niloticus]	Q08BN9/0.0/ NXPE3_DANRE NXPE family member 3 OS=Danio rerio GN=nxpe3 PE=2 SV=1	xma:102227992/3e-95/homer protein homolog 3-like; K15010 homer	NA
S.schlegelii_GLEAN_10005007	4.96609	4.4006	0.00121003	0.0175567	gi|808884315|gb|KKF31305.1|/0/Creatine kinase M-type [Larimichthys crocea]	P00564/3e-105/ KCRM_RAT Creatine kinase M-type OS=Rattus norvegicus GN=Ckm PE=1 SV=2	lco:104935441/0.0/creatine kinase M-type-like; K00933 creatine kinase [EC:2.7.3.2]	molecular_function:GO:0016301//kinase activity;GO:0016772//transferase activity, transferring phosphorus-containing groups;
S.schlegelii_GLEAN_10017690	4.96644	4.40076	0.00123907	0.0175567	gi|736208563|ref|XP_010776537.1|/8.34167e-126/PREDICTED: PHD and RING finger domain-containing protein 1-like [Notothenia coriiceps]	A6H619/8e-41/ PHRF1_MOUSE PHD and RING finger domain-containing protein 1 OS=Mus musculus GN=Phrf1 PE=1 SV=2	lcf:108890336/3e-135/PHD and RING finger domain-containing protein 1-like; K17586 PHD and RING finger domain-containing protein 1	molecular_function:GO:0005515//protein binding;GO:0008270//zinc ion binding;
S.schlegelii_GLEAN_10018667	4.96949	4.40231	0.00132657	0.0181223	gi|734626183|ref|XP_010741222.1|/0/PREDICTED: LOW QUALITY PROTEIN: ras GTPase-activating protein-binding protein 1-like [Larimichthys crocea]	Q5RB87/0.0/ G3BP1_PONAB Ras GTPase-activating protein-binding protein 1 OS=Pongo abelii GN=G3BP1 PE=2 SV=1	lco:104928605/0.0/g3bp1; G3BP stress granule assembly factor 1; K17265 Ras GTPase-activating protein-binding protein 1 [EC:3.6.4.12 3.6.4.13]	biological_process:GO:0006810//transport;cellular_component:GO:0005622//intracellular;molecular_function:GO:0003676//nucleic acid binding;
S.schlegelii_GLEAN_10008817	4.97167	4.40339	0.00123685	0.0175567	gi|542196497|ref|XP_005472922.1|/8.02372e-141/PREDICTED: uncharacterized protein C2orf47 homolog, mitochondrial-like [Oreochromis niloticus]	Q8BHE8/2e-35/ MAIP1_MOUSE m-AAA protease-interacting protein 1, mitochondrial OS=Mus musculus GN=Maip1 PE=1 SV=1	NA	NA
S.schlegelii_GLEAN_10006878	4.97176	4.40343	0.00123834	0.0175567	gi|657748919|ref|XP_008309810.1|/0/PREDICTED: fibulin-7-like [Cynoglossus semilaevis]	Q53RD9/2e-100/ FBLN7_HUMAN Fibulin-7 OS=Homo sapiens GN=FBLN7 PE=2 SV=1	lcf:108872677/0.0/LOW QUALITY PROTEIN: fibulin-7-like; K17342 fibulin 7	molecular_function:GO:0005509//calcium ion binding;GO:0005515//protein binding;
S.schlegelii_GLEAN_10018259	4.97194	4.40352	0.00121006	0.0175567	gi|657581838|ref|XP_008294954.1|/0/PREDICTED: nucleolar protein 14 [Stegastes partitus]	P78316/0.0/ NOP14_HUMAN Nucleolar protein 14 OS=Homo sapiens GN=NOP14 PE=1 SV=3	lcf:108874053/0.0/nop14; nucleolar protein 14; K14766 nucleolar protein 14	cellular_component:GO:0032040//small-subunit processome;
S.schlegelii_GLEAN_10012666	4.97211	4.40363	0.00121112	0.0175567	gi|734607796|ref|XP_010731113.1|/0/PREDICTED: rho guanine nucleotide exchange factor 19-like [Larimichthys crocea]	Q8BWA8/1e-75/ ARHGJ_MOUSE Rho guanine nucleotide exchange factor 19 OS=Mus musculus GN=Arhgef19 PE=1 SV=1	lcf:108889975/0.0/rho guanine nucleotide exchange factor 19-like; K20684 Rho guanine nucleotide exchange factor 5	biological_process:GO:0035023//regulation of Rho protein signal transduction;molecular_function:GO:0005089//Rho guanyl-nucleotide exchange factor activity;
S.schlegelii_GLEAN_10001790	4.97534	4.40552	0.00147286	0.0198384	gi|657587629|ref|XP_008298115.1|/0/PREDICTED: protein FAM151A-like [Stegastes partitus]	A5PN38/6e-164/ F151A_DANRE Protein FAM151A OS=Danio rerio GN=fam151a PE=3 SV=1	aam:106496341/7e-16/zinc finger FYVE domain-containing protein 16-like; K04679 MAD, mothers against decapentaplegic interacting protein	NA
S.schlegelii_GLEAN_10011663	4.97979	4.40748	0.00123738	0.0175567	gi|734608734|ref|XP_010731637.1|/0/PREDICTED: zinc finger protein 644-like [Larimichthys crocea]	Q9H582/2e-70/ ZN644_HUMAN Zinc finger protein 644 OS=Homo sapiens GN=ZNF644 PE=1 SV=2	sbq:101035198/1e-11/ZFP69B; zinc finger protein ZFP69B isoform X2; K09228 KRAB domain-containing zinc finger protein	molecular_function:GO:0046872//metal ion binding;
S.schlegelii_GLEAN_10022294	4.99553	4.41561	0.000868132	0.0128175	gi|657583262|ref|XP_008295730.1|/0/PREDICTED: interferon regulatory factor 4-like [Stegastes partitus] &gt;gi|657583264|ref|XP_008295731.1| PREDICTED: interferon regulatory factor 4-like [Stegastes partitus] &gt;gi|657587784|ref|XP_008298200.1| PREDICTED: interferon regulatory factor 4-like [Stegastes partitus] &gt;gi|657587786|ref|XP_008298202.1| PREDICTED: interferon regulatory factor 4-like [S…	Q15306/2e-160/ IRF4_HUMAN Interferon regulatory factor 4 OS=Homo sapiens GN=IRF4 PE=1 SV=1	lco:104931524/0.0/irf4; interferon regulatory factor 4; K09445 interferon regulatory factor 4	biological_process:GO:0006355//regulation of transcription, DNA-templated;molecular_function:GO:0000975//regulatory region DNA binding;GO:0003700//sequence-specific DNA binding transcription factor activity;
S.schlegelii_GLEAN_10018031	4.99703	4.4162	0.000659506	0.0101125	gi|736297253|ref|XP_010791853.1|/2.30349e-148/PREDICTED: uncharacterized protein LOC104964702 [Notothenia coriiceps]	NA	NA	NA
S.schlegelii_GLEAN_10010040	4.99919	4.4173	0.000630508	0.0100507	gi|317418749|emb|CBN80787.1|/0/Pancreatic elastase [Dicentrarchus labrax]	Q7SIG3/5e-137/ ELA1_SALSA Elastase-1 OS=Salmo salar PE=1 SV=1	lco:104922033/0.0/elastase-1-like; K01326 pancreatic elastase I [EC:3.4.21.36]	biological_process:GO:0006508//proteolysis;molecular_function:GO:0004252//serine-type endopeptidase activity;
S.schlegelii_GLEAN_10003694	5.00026	4.41778	0.000701393	0.0104767	gi|657550343|ref|XP_008279790.1|/0/PREDICTED: putative aminopeptidase W07G4.4 [Stegastes partitus]	Q8NDH3/8e-16/ PEPL1_HUMAN Probable aminopeptidase NPEPL1 OS=Homo sapiens GN=NPEPL1 PE=1 SV=3	dre:767682/0.0/zgc:152830; uncharacterized protein LOC767682; K01255 leucyl aminopeptidase [EC:3.4.11.1]	biological_process:GO:0006508//proteolysis;GO:0019538//protein metabolic process;cellular_component:GO:0005622//intracellular;GO:0005737//cytoplasm;molecular_function:GO:0004177//aminopeptidase activity;GO:0008235//metalloexopeptidase activity;GO:0030145//manganese ion binding;
S.schlegelii_GLEAN_10011588	5.00089	4.41816	0.000654114	0.0101125	gi|808885100|gb|KKF31952.1|/0/UDP-glucuronic acid/UDP-N-acetylgalactosamine transporter [Larimichthys crocea]	Q5RDC9/1e-173/ S35D2_PONAB UDP-N-acetylglucosamine/UDP-glucose/GDP-mannose transporter OS=Pongo abelii GN=SLC35D2 PE=2 SV=1	lco:104933504/0.0/UDP-glucuronic acid/UDP-N-acetylgalactosamine transporter-like; K15281 solute carrier family 35	NA
S.schlegelii_GLEAN_10013137	5.00109	4.41827	0.00063858	0.0100664	gi|908511587|ref|XP_013129286.1|/0/PREDICTED: TRPM8 channel-associated factor homolog [Oreochromis niloticus]	A4IG42/0.0/ TCAF_DANRE TRPM8 channel-associated factor homolog OS=Danio rerio GN=tcaf PE=2 SV=1	sbq:104651700/2e-18/LOW QUALITY PROTEIN: protein FAM115E-like; K01587 phosphoribosylaminoimidazole carboxylase / phosphoribosylaminoimidazole-succinocarboxamide synthase [EC:4.1.1.21 6.3.2.6]	NA
S.schlegelii_GLEAN_10019081	5.00707	4.4213	0.000656888	0.0101125	gi|734629619|ref|XP_010743110.1|/0/PREDICTED: RNA polymerase-associated protein CTR9 homolog [Larimichthys crocea]	Q62018/0.0/ CTR9_MOUSE RNA polymerase-associated protein CTR9 homolog OS=Mus musculus GN=Ctr9 PE=1 SV=2	lco:104930101/0.0/ctr9; CTR9 homolog, Paf1/RNA polymerase II complex component; K15176 RNA polymerase-associated protein CTR9	molecular_function:GO:0005515//protein binding;
S.schlegelii_GLEAN_10008175	5.01314	4.4244	0.000643347	0.0100802	gi|617302021|ref|XP_007545411.1|/0/PREDICTED: cleavage and polyadenylation specificity factor subunit 2 isoform X2 [Poecilia formosa] &gt;gi|961806778|ref|XP_014913137.1| PREDICTED: cleavage and polyadenylation specificity factor subunit 2 [Poecilia latipinna]	O35218/0.0/ CPSF2_MOUSE Cleavage and polyadenylation specificity factor subunit 2 OS=Mus musculus GN=Cpsf2 PE=1 SV=1	lco:104930840/0.0/cpsf2; cleavage and polyadenylation specific factor 2; K14402 cleavage and polyadenylation specificity factor subunit 2	biological_process:GO:0006378//mRNA polyadenylation;GO:0006379//mRNA cleavage;cellular_component:GO:0005847//mRNA cleavage and polyadenylation specificity factor complex;
S.schlegelii_GLEAN_10021403	5.01602	4.42588	0.000630991	0.0100507	gi|736185131|ref|XP_010769842.1|/8.36367e-127/PREDICTED: transmembrane emp24 domain-containing protein 1 [Notothenia coriiceps]	Q28BQ6/1e-75/ TMED1_XENTR Transmembrane emp24 domain-containing protein 1 OS=Xenopus tropicalis GN=tmed1 PE=2 SV=1	lco:104918588/8e-130/tmed1; transmembrane emp24 domain-containing protein 1; K20348 p24 family protein gamma-1	biological_process:GO:0006810//transport;cellular_component:GO:0016021//integral component of membrane;
S.schlegelii_GLEAN_10019929	5.01898	4.42737	0.000666923	0.0101493	gi|736224528|ref|XP_010780835.1|/6.30278e-145/PREDICTED: CD302 antigen [Notothenia coriiceps]	A8WH75/2e-29/ CD302_PIG CD302 antigen OS=Sus scrofa GN=CD302 PE=2 SV=1	ncc:104955250/1e-145/cd302; CD302 antigen; K06722 CD302 antigen	NA
S.schlegelii_GLEAN_10017038	5.01936	4.42759	0.000662822	0.010127	gi|734608938|ref|XP_010731750.1|/9.09233e-93/PREDICTED: myoD family inhibitor domain-containing protein-like [Larimichthys crocea]	Q9P1T7/5e-08/ MDFIC_HUMAN MyoD family inhibitor domain-containing protein OS=Homo sapiens GN=MDFIC PE=1 SV=2	tng:GSTEN00016116G001/2e-38/unnamed protein product; K09409 forkhead box protein P	NA
S.schlegelii_GLEAN_10007987	5.02256	4.42922	0.000636835	0.0100664	gi|930774087|ref|XP_005952588.2|/1.09691e-126/PREDICTED: CMP-N-acetylneuraminate-beta-galactosamide-alpha-2,3-sialyltransferase 1-like, partial [Haplochromis burtoni]	Q02745/2e-53/ SIA4A_PIG CMP-N-acetylneuraminate-beta-galactosamide-alpha-2,3-sialyltransferase 1 OS=Sus scrofa GN=ST3GAL1 PE=1 SV=1	lcf:108900331/4e-115/CMP-N-acetylneuraminate-beta-galactosamide- alpha-2,3-sialyltransferase 1-like; K00780 beta-galactoside alpha-2,3-sialyltransferase (sialyltransferase 4A) [EC:2.4.99.4]	biological_process:GO:0006486//protein glycosylation;molecular_function:GO:0008373//sialyltransferase activity;
S.schlegelii_GLEAN_10009418	5.02262	4.42927	0.000790069	0.0117213	gi|597744980|ref|XP_007234534.1|/2.66038e-86/PREDICTED: protein yippee-like 3 isoform X1 [Astyanax mexicanus]	Q65Z54/3e-87/ YPEL3_ORYLA Protein yippee-like 3 OS=Oryzias latipes GN=ypel3 PE=3 SV=1	sgh:107568027/4e-25/zinc transporter 10-like; K14697 solute carrier family 30 (zinc transporter), member 10	NA
S.schlegelii_GLEAN_10022344	5.02685	4.4316	0.000844799	0.012497	gi|736223589|ref|XP_010780552.1|/1.07224e-45/PREDICTED: protein phosphatase 1 regulatory subunit 17 [Notothenia coriiceps]	Q9Z2E4/1e-06/ PPR17_MOUSE Protein phosphatase 1 regulatory subunit 17 OS=Mus musculus GN=Ppp1r17 PE=1 SV=1	ncc:104955025/2e-46/ppp1r17; protein phosphatase 1 regulatory subunit 17; K08067 protein phosphatase 1 regulatory subunit 17	NA
S.schlegelii_GLEAN_10003422	5.02726	4.43162	0.000633237	0.0100664	gi|734645769|ref|XP_010751992.1|/3.26239e-154/PREDICTED: interactor protein for cytohesin exchange factors 1-like [Larimichthys crocea]	Q5DU31/4e-72/ ICEF1_MOUSE Interactor protein for cytohesin exchange factors 1 OS=Mus musculus GN=Ipcef1 PE=1 SV=2	lcf:108872444/1e-152/connector enhancer of kinase suppressor of ras 3-like; K17536 connector enhancer of kinase suppressor of Ras 2	NA
S.schlegelii_GLEAN_10010543	5.02739	4.43165	0.000699005	0.0104612	gi|736162098|ref|XP_010791502.1|/0/PREDICTED: cell cycle control protein 50A-like [Notothenia coriiceps]	Q2T9P5/3e-106/ CC50C_BOVIN Cell cycle control protein 50C OS=Bos taurus GN=TMEM30C PE=2 SV=1	NA	cellular_component:GO:0016020//membrane;
S.schlegelii_GLEAN_10004498	5.02944	4.43277	0.000676188	0.0102502	gi|642112373|emb|CDQ70107.1|/0/unnamed protein product [Oncorhynchus mykiss]	O15209/2e-94/ ZBT22_HUMAN Zinc finger and BTB domain-containing protein 22 OS=Homo sapiens GN=ZBTB22 PE=1 SV=1	lcf:108881906/0.0/LOW QUALITY PROTEIN: zinc finger and BTB domain-containing protein 22-like; K10502 zinc finger and BTB domain-containing protein 22	molecular_function:GO:0005515//protein binding;GO:0046872//metal ion binding;
S.schlegelii_GLEAN_10013434	5.02947	4.43276	0.0006491	0.0101085	gi|808878716|gb|KKF26943.1|/4.35986e-159/Methyl-CpG-binding domain protein 3 [Larimichthys crocea]	O95983/2e-120/ MBD3_HUMAN Methyl-CpG-binding domain protein 3 OS=Homo sapiens GN=MBD3 PE=1 SV=1	lco:104929650/8e-160/methyl-CpG-binding domain protein 3; K11591 methyl-CpG-binding domain protein 3	NA
S.schlegelii_GLEAN_10004651	5.0298	4.43294	0.000666838	0.0101493	gi|736251597|ref|XP_010788204.1|/0/PREDICTED: Golgi membrane protein 1 [Notothenia coriiceps] &gt;gi|736251601|ref|XP_010788205.1| PREDICTED: Golgi membrane protein 1 [Notothenia coriiceps]	Q91XA2/2e-53/ GOLM1_MOUSE Golgi membrane protein 1 OS=Mus musculus GN=Golm1 PE=1 SV=2	NA	NA
S.schlegelii_GLEAN_10010700	5.03138	4.43372	0.00066854	0.0101638	gi|542224287|ref|XP_005451529.1|/0/PREDICTED: tetratricopeptide repeat protein 16-like isoform X5 [Oreochromis niloticus]	Q8NEE8/1e-100/ TTC16_HUMAN Tetratricopeptide repeat protein 16 OS=Homo sapiens GN=TTC16 PE=2 SV=2	phi:102101929/5e-06/STIP1; stress induced phosphoprotein 1; K09553 stress-induced-phosphoprotein 1	molecular_function:GO:0005515//protein binding;
S.schlegelii_GLEAN_10017558	5.03237	4.43424	0.000643252	0.0100802	gi|736214358|ref|XP_010778145.1|/8.86671e-108/PREDICTED: PTB domain-containing engulfment adapter protein 1-like [Notothenia coriiceps]	Q9UBP9/9e-21/ GULP1_HUMAN PTB domain-containing engulfment adapter protein 1 OS=Homo sapiens GN=GULP1 PE=1 SV=1	ncc:104962908/2e-18/extracellular serine/threonine protein kinase FAM20C-like; K21958 extracellular serine/threonine protein kinase FAM20C [EC:2.7.11.1]	molecular_function:GO:0005515//protein binding;
S.schlegelii_GLEAN_10016738	5.03675	4.4365	0.000637517	0.0100664	gi|734620447|ref|XP_010738073.1|/8.13817e-117/PREDICTED: tumor necrosis factor ligand superfamily member 6-like [Larimichthys crocea]	P41047/2e-22/ TNFL6_MOUSE Tumor necrosis factor ligand superfamily member 6 OS=Mus musculus GN=Faslg PE=1 SV=1	lco:104926008/2e-117/tumor necrosis factor ligand superfamily member 6-like; K04389 tumor necrosis factor ligand superfamily member 6	biological_process:GO:0006955//immune response;cellular_component:GO:0016020//membrane;molecular_function:GO:0005164//tumor necrosis factor receptor binding;
S.schlegelii_GLEAN_10010054	5.03699	4.4366	0.000684174	0.0102908	gi|229367976|gb|ACQ58968.1|/1.17911e-123/PRA1 family protein 3 [Anoplopoma fimbria]	Q5R4X8/4e-88/ PRAF3_PONAB PRA1 family protein 3 OS=Pongo abelii GN=ARL6IP5 PE=2 SV=1	lco:104932179/8e-125/arl6ip5; ADP ribosylation factor like GTPase 6 interacting protein 5; K20393 PRA1 family protein 3	NA
S.schlegelii_GLEAN_10014348	5.03888	4.4376	0.000653676	0.0101125	gi|736190542|ref|XP_010771284.1|/2.40862e-133/PREDICTED: uncharacterized protein LOC104947050 [Notothenia coriiceps] &gt;gi|736190546|ref|XP_010771285.1| PREDICTED: uncharacterized protein LOC104947050 [Notothenia coriiceps] &gt;gi|736190551|ref|XP_010771286.1| PREDICTED: uncharacterized protein LOC104947050 [Notothenia coriiceps] &gt;gi|736190556|ref|XP_010771287.1| PREDICTED: uncharacterized pr…	NA	NA	NA
S.schlegelii_GLEAN_10004451	5.0391	4.43771	0.000646628	0.0101007	gi|657553272|ref|XP_008281043.1|/0/PREDICTED: macrophage-capping protein [Stegastes partitus]	Q6AYC4/1e-110/ CAPG_RAT Macrophage-capping protein OS=Rattus norvegicus GN=Capg PE=1 SV=1	lcf:108879978/0.0/nuclear factor 7, brain-like; K12015 tripartite motif-containing protein 39 [EC:2.3.2.27]	biological_process:GO:0051016//barbed-end actin filament capping;molecular_function:GO:0003779//actin binding;GO:0005515//protein binding;
S.schlegelii_GLEAN_10015811	5.04014	4.43824	0.000649834	0.0101096	gi|657555151|ref|XP_008282038.1|/0/PREDICTED: ER membrane protein complex subunit 3 [Stegastes partitus]	Q7SXW4/0.0/ EMC3_DANRE ER membrane protein complex subunit 3 OS=Danio rerio GN=emc3 PE=2 SV=1	dgr:Dgri_GH17886/3e-11/GH17886 gene product from transcript GH17886-RA; K02907 large subunit ribosomal protein L30	cellular_component:GO:0016020//membrane;
S.schlegelii_GLEAN_10021458	5.04164	4.43903	0.000636592	0.0100664	gi|808877988|gb|KKF26301.1|/0/GTPase IMAP family member 8 [Larimichthys crocea]	Q8ND71/3e-25/ GIMA8_HUMAN GTPase IMAP family member 8 OS=Homo sapiens GN=GIMAP8 PE=2 SV=2	ncc:104955459/6e-49/uncharacterized protein LOC104955459; K04868 voltage-dependent calcium channel gamma-3	molecular_function:GO:0005525//GTP binding;
S.schlegelii_GLEAN_10023786	5.04175	4.43906	0.00065949	0.0101125	gi|734610921|ref|XP_010732839.1|/1.32037e-173/PREDICTED: thioredoxin-dependent peroxide reductase, mitochondrial [Larimichthys crocea]	Q5REY3/7e-131/ PRDX3_PONAB Thioredoxin-dependent peroxide reductase, mitochondrial OS=Pongo abelii GN=PRDX3 PE=2 SV=1	lco:104921870/1e-173/prdx3; peroxiredoxin 3; K20011 peroxiredoxin 3 [EC:1.11.1.15]	biological_process:GO:0055114//oxidation-reduction process;molecular_function:GO:0016209//antioxidant activity;GO:0016491//oxidoreductase activity;GO:0051920//peroxiredoxin activity;
S.schlegelii_GLEAN_10010084	5.04191	4.43916	0.000644696	0.0100903	gi|657554837|ref|XP_008281901.1|/0/PREDICTED: aladin isoform X1 [Stegastes partitus]	Q9NRG9/0.0/ AAAS_HUMAN Aladin OS=Homo sapiens GN=AAAS PE=1 SV=1	lcf:108900213/0.0/aaas; aladin isoform X1; K14320 aladin	molecular_function:GO:0005515//protein binding;
S.schlegelii_GLEAN_10023586	5.04313	4.43978	0.000638963	0.0100664	gi|734615099|ref|XP_010735126.1|/0/PREDICTED: keratin, type I cytoskeletal 18-like [Larimichthys crocea]	O57611/3e-92/ K1C18_SCYST Keratin, type I cytoskeletal 18 OS=Scyliorhinus stellaris GN=krt18 PE=1 SV=1	lcf:108876015/0.0/keratin, type I cytoskeletal 18-like; K07604 type I keratin, acidic	cellular_component:GO:0005882//intermediate filament;molecular_function:GO:0005198//structural molecule activity;
S.schlegelii_GLEAN_10020984	5.04591	4.44122	0.00066369	0.0101302	gi|657586523|ref|XP_008297511.1|/2.60431e-127/PREDICTED: dorsal-ventral patterning tolloid-like protein 1, partial [Stegastes partitus]	O57460/1e-110/ TLL1_DANRE Dorsal-ventral patterning tolloid-like protein 1 OS=Danio rerio GN=tll1 PE=2 SV=1	xma:102227476/3e-126/dorsal-ventral patterning tolloid-like protein 1; K09608 tolloid-like protein 1 [EC:3.4.24.-]	NA
S.schlegelii_GLEAN_10010000	5.05062	4.44365	0.000661712	0.010127	gi|734606547|ref|XP_010730421.1|/0/PREDICTED: SH3 and cysteine-rich domain-containing protein 3 [Larimichthys crocea]	Q6DBR6/5e-180/ STAC3_DANRE SH3 and cysteine-rich domain-containing protein 3 OS=Danio rerio GN=stac3 PE=1 SV=1	bmy:Bm1_02735/9e-12/Variant SH3 domain containing protein; K20045 intersectin	biological_process:GO:0035556//intracellular signal transduction;molecular_function:GO:0005515//protein binding;
S.schlegelii_GLEAN_10018990	5.05198	4.44435	0.000651843	0.0101125	gi|736297845|ref|XP_010792063.1|/0/PREDICTED: high-affinity choline transporter 1-like [Notothenia coriiceps] &gt;gi|736297849|ref|XP_010792064.1| PREDICTED: high-affinity choline transporter 1-like [Notothenia coriiceps]	Q8UWF0/0.0/ SC5A7_TORMA High-affinity choline transporter 1 OS=Torpedo marmorata GN=CHT1 PE=2 SV=1	ncc:104964870/0.0/high-affinity choline transporter 1-like; K14387 solute carrier family 5 (high affinity choline transporter), member 7	biological_process:GO:0006810//transport;GO:0055085//transmembrane transport;cellular_component:GO:0016020//membrane;molecular_function:GO:0005215//transporter activity;
S.schlegelii_GLEAN_10001135	5.05349	4.44518	0.000678497	0.0102644	gi|808871988|gb|KKF21554.1|/0/Alcohol dehydrogenase [NADP(+)] B [Larimichthys crocea]	Q568L5/0.0/ A1A1B_DANRE Alcohol dehydrogenase [NADP(+)] B OS=Danio rerio GN=akr1a1b PE=2 SV=1	lcf:108878819/0.0/akr1a1; alcohol dehydrogenase [NADP(+)] isoform X1; K00002 alcohol dehydrogenase (NADP+) [EC:1.1.1.2]	biological_process:GO:0055114//oxidation-reduction process;molecular_function:GO:0016491//oxidoreductase activity;
S.schlegelii_GLEAN_10014878	5.05358	4.44518	0.000656687	0.0101125	gi|657596820|ref|XP_008303132.1|/6.57959e-134/PREDICTED: keratin, type I cytoskeletal 18-like isoform X1 [Stegastes partitus] &gt;gi|657596822|ref|XP_008303133.1| PREDICTED: keratin, type I cytoskeletal 18-like isoform X1 [Stegastes partitus]	O57611/4e-51/ K1C18_SCYST Keratin, type I cytoskeletal 18 OS=Scyliorhinus stellaris GN=krt18 PE=1 SV=1	lcf:108892836/1e-136/keratin, type I cytoskeletal 18-like; K07604 type I keratin, acidic	cellular_component:GO:0005882//intermediate filament;molecular_function:GO:0005198//structural molecule activity;
S.schlegelii_GLEAN_10014686	5.05833	4.44762	0.000630906	0.0100507	gi|734634728|ref|XP_010745914.1|/8.44571e-110/PREDICTED: dual specificity protein phosphatase 22 [Larimichthys crocea]	Q566R7/8e-80/ DS22B_DANRE Dual specificity protein phosphatase 22-B OS=Danio rerio GN=dusp22b PE=2 SV=2	lcf:108879569/1e-107/dusp22; LOW QUALITY PROTEIN: dual specificity protein phosphatase 22; K14165 atypical dual specificity phosphatase [EC:3.1.3.16 3.1.3.48]	biological_process:GO:0006470//protein dephosphorylation;GO:0016311//dephosphorylation;molecular_function:GO:0008138//protein tyrosine/serine/threonine phosphatase activity;GO:0016791//phosphatase activity;
S.schlegelii_GLEAN_10011955	5.05935	4.44816	0.000629866	0.0100507	gi|808866162|gb|KKF16918.1|/4.4301e-111/60S ribosomal protein L21 [Larimichthys crocea]	A5JSS2/3e-101/ RL21_CAPHI 60S ribosomal protein L21 OS=Capra hircus GN=RPL21 PE=2 SV=1	lco:104924961/8e-112/rpl21; ribosomal protein L21; K02889 large subunit ribosomal protein L21e	biological_process:GO:0006412//translation;cellular_component:GO:0005622//intracellular;GO:0005840//ribosome;molecular_function:GO:0003735//structural constituent of ribosome;
S.schlegelii_GLEAN_10021033	5.05965	4.44832	0.000659898	0.0101125	gi|808870416|gb|KKF20263.1|/0/BRCA1-associated ATM activator 1 [Larimichthys crocea]	Q1RLU1/1e-136/ BRAT1_DANRE BRCA1-associated ATM activator 1 OS=Danio rerio GN=brat1 PE=2 SV=1	NA	NA
S.schlegelii_GLEAN_10022818	5.06161	4.44946	0.000754815	0.0112091	gi|734605015|ref|XP_010729592.1|/0/PREDICTED: hydroxymethylglutaryl-CoA lyase, mitochondrial [Larimichthys crocea]	Q29448/0.0/ HMGCL_BOVIN Hydroxymethylglutaryl-CoA lyase, mitochondrial OS=Bos taurus GN=HMGCL PE=2 SV=2	ncc:104946720/0.0/hmgcl; hydroxymethylglutaryl-CoA lyase, mitochondrial isoform X1; K01640 hydroxymethylglutaryl-CoA lyase [EC:4.1.3.4]	biological_process:GO:0046951//ketone body biosynthetic process;cellular_component:GO:0005739//mitochondrion;molecular_function:GO:0003824//catalytic activity;GO:0004419//hydroxymethylglutaryl-CoA lyase activity;
S.schlegelii_GLEAN_10022305	5.06297	4.45005	0.000653284	0.0101125	gi|808878557|gb|KKF26784.1|/0/Insulin-like growth factor-binding protein 3 [Larimichthys crocea]	P17936/1e-91/ IBP3_HUMAN Insulin-like growth factor-binding protein 3 OS=Homo sapiens GN=IGFBP3 PE=1 SV=2	lco:104929330/0.0/insulin-like growth factor-binding protein 3; K10138 insulin-like growth factor-binding protein 3	biological_process:GO:0001558//regulation of cell growth;cellular_component:GO:0005576//extracellular region;molecular_function:GO:0005520//insulin-like growth factor binding;
S.schlegelii_GLEAN_10002864	5.07135	4.45442	0.000684343	0.0102908	gi|734619044|ref|XP_010737304.1|/0/PREDICTED: dnaJ homolog subfamily B member 1 [Larimichthys crocea]	Q3MI00/9e-164/ DNJB1_BOVIN DnaJ homolog subfamily B member 1 OS=Bos taurus GN=DNAJB1 PE=2 SV=3	lco:104925391/0.0/dnajb1; dnaJ homolog subfamily B member 1; K09507 DnaJ homolog subfamily B member 1	NA
S.schlegelii_GLEAN_10006147	5.07172	4.4546	0.000684938	0.0102908	gi|734650657|ref|XP_010754665.1|/4.51393e-157/PREDICTED: uncharacterized protein LOC104939814 [Larimichthys crocea]	Q05A80/1e-10/ CAPR2_MOUSE Caprin-2 OS=Mus musculus GN=Caprin2 PE=1 SV=1	ccar:109107100/7e-32/complement C1q tumor necrosis factor-related protein 6-like isoform X1; K19470 complement C1q tumor necrosis factor-related protein 6	NA
S.schlegelii_GLEAN_10013808	5.07519	4.45642	0.000670487	0.0101833	gi|734611880|ref|XP_010733366.1|/0/PREDICTED: soluble calcium-activated nucleotidase 1-like isoform X1 [Larimichthys crocea]	Q8K4Y7/0.0/ CANT1_RAT Soluble calcium-activated nucleotidase 1 OS=Rattus norvegicus GN=Cant1 PE=1 SV=1	lco:104922273/0.0/soluble calcium-activated nucleotidase 1-like; K12304 soluble calcium-activated nucleotidase 1 [EC:3.6.1.6]	molecular_function:GO:0005509//calcium ion binding;GO:0016462//pyrophosphatase activity;
S.schlegelii_GLEAN_10007714	5.07566	4.45664	0.000636687	0.0100664	gi|657583442|ref|XP_008295829.1|/6.94569e-120/PREDICTED: lysM and putative peptidoglycan-binding domain-containing protein 1 [Stegastes partitus]	Q5HZA4/7e-51/ LYSM1_RAT LysM and putative peptidoglycan-binding domain-containing protein 1 OS=Rattus norvegicus GN=Lysmd1 PE=1 SV=1	NA	NA
S.schlegelii_GLEAN_10016331	5.07695	4.45731	0.000734581	0.0109192	gi|229366380|gb|ACQ58170.1|/0/PIH1 domain-containing protein 2 [Anoplopoma fimbria]	Q5PRB3/1e-91/ PIHD2_DANRE PIH1 domain-containing protein 2 OS=Danio rerio GN=pih1d2 PE=2 SV=1	NA	NA
S.schlegelii_GLEAN_10002191	5.07717	4.45742	0.000690631	0.0103561	gi|808876806|gb|KKF25406.1|/0/Nuclear factor 7, ovary [Larimichthys crocea]	Q02084/7e-50/ A33_PLEWA Zinc-binding protein A33 OS=Pleurodeles waltl PE=1 SV=2	lco:104925383/0.0/nuclear factor 7, brain-like; K12012 tripartite motif-containing protein 35	cellular_component:GO:0005622//intracellular;molecular_function:GO:0005515//protein binding;GO:0008270//zinc ion binding;
S.schlegelii_GLEAN_10011500	5.0772	4.45744	0.000639846	0.0100664	gi|974069856|ref|XP_015232534.1|/2.1668e-81/PREDICTED: hemoglobin subunit beta-like [Cyprinodon variegatus]	P80044/2e-79/ HBB_TREBE Hemoglobin subunit beta OS=Trematomus bernacchii GN=hbb PE=1 SV=2	nfu:107388127/1e-80/hemoglobin subunit beta-1-like; K13825 hemoglobin subunit epsilon	biological_process:GO:0015671//oxygen transport;cellular_component:GO:0005833//hemoglobin complex;molecular_function:GO:0005506//iron ion binding;GO:0019825//oxygen binding;GO:0020037//heme binding;
S.schlegelii_GLEAN_10018649	5.08087	4.45937	0.000634641	0.0100664	gi|808858883|gb|KKF11195.1|/0/Protein bicaudal C [Larimichthys crocea]	Q99MQ1/1e-143/ BICC1_MOUSE Protein bicaudal C homolog 1 OS=Mus musculus GN=Bicc1 PE=1 SV=1	lco:104927295/0.0/protein bicaudal C homolog 1-like; K18756 protein bicaudal C	molecular_function:GO:0003676//nucleic acid binding;GO:0003723//RNA binding;GO:0005515//protein binding;
S.schlegelii_GLEAN_10017035	5.08097	4.45943	0.000655284	0.0101125	gi|734608940|ref|XP_010731751.1|/0/PREDICTED: probable methyltransferase BTM2 homolog isoform X1 [Larimichthys crocea]	Q0P410/0.0/ BMT2_DANRE Probable methyltransferase BMT2 homolog OS=Danio rerio GN=zgc:153606 PE=2 SV=1	NA	NA
S.schlegelii_GLEAN_10016375	5.08103	4.45945	0.000657963	0.0101125	gi|734650953|ref|XP_010754827.1|/0/PREDICTED: NLR family member X1 [Larimichthys crocea]	Q3TL44/0.0/ NLRX1_MOUSE NLR family member X1 OS=Mus musculus GN=Nlrx1 PE=1 SV=1	lco:104939972/0.0/nlrx1; NLR family member X1; K12653 NLR family member X1	NA
S.schlegelii_GLEAN_10021007	5.0837	4.46083	0.000666145	0.0101493	gi|734594764|ref|XP_010727752.1|/0/PREDICTED: TNFAIP3-interacting protein 2 [Larimichthys crocea]	Q99JG7/3e-69/ TNIP2_MOUSE TNFAIP3-interacting protein 2 OS=Mus musculus GN=Tnip2 PE=1 SV=1	mgp:100541824/8e-08/CEP55; centrosomal protein 55; K16456 centrosomal protein CEP55	NA
S.schlegelii_GLEAN_10016905	5.08378	4.46088	0.000645305	0.0100903	gi|657575453|ref|XP_008291463.1|/2.65267e-125/PREDICTED: L-selectin-like isoform X2 [Stegastes partitus]	P18337/2e-52/ LYAM1_MOUSE L-selectin OS=Mus musculus GN=Sell PE=1 SV=1	nfu:107393219/2e-121/L-selectin-like; K06495 selectin, lymphocyte	NA
S.schlegelii_GLEAN_10013904	5.08599	4.46205	0.000676227	0.0102502	gi|734650291|ref|XP_010754469.1|/0/PREDICTED: uncharacterized protein LOC104939612 [Larimichthys crocea]	P10394/2e-25/ POL4_DROME Retrovirus-related Pol polyprotein from transposon 412 OS=Drosophila melanogaster GN=POL PE=3 SV=1	pxy:105386838/2e-33/uncharacterized LOC105386838; K14401 cleavage and polyadenylation specificity factor subunit 1	biological_process:GO:0015074//DNA integration;
S.schlegelii_GLEAN_10015884	5.08928	4.46431	0.000909325	0.0133999	gi|657596571|ref|XP_008302994.1|/1.1058e-68/PREDICTED: cocaine- and amphetamine-regulated transcript protein-like [Stegastes partitus]	Q16568/5e-17/ CART_HUMAN Cocaine- and amphetamine-regulated transcript protein OS=Homo sapiens GN=CARTPT PE=1 SV=1	fab:101820844/9e-14/CARTPT; CART prepropeptide; K06236 collagen, type I, alpha	biological_process:GO:0000186//activation of MAPKK activity;GO:0001678//cellular glucose homeostasis;GO:0007186//G-protein coupled receptor signaling pathway;GO:0008343//adult feeding behavior;GO:0009267//cellular response to starvation;GO:0032099//negative regulation of appetite;cellular_component:GO:0005615//extracellular space;
S.schlegelii_GLEAN_10001789	5.08967	4.46397	0.000677002	0.0102518	gi|657571157|ref|XP_008289136.1|/5.74949e-120/PREDICTED: ubiquitin-like-conjugating enzyme ATG10 [Stegastes partitus] &gt;gi|657571159|ref|XP_008289137.1| PREDICTED: ubiquitin-like-conjugating enzyme ATG10 [Stegastes partitus] &gt;gi|657571161|ref|XP_008289138.1| PREDICTED: ubiquitin-like-conjugating enzyme ATG10 [Stegastes partitus]	Q8R1P4/2e-57/ ATG10_MOUSE Ubiquitin-like-conjugating enzyme ATG10 OS=Mus musculus GN=Atg10 PE=1 SV=1	lco:109142683/2e-132/ubiquitin-like-conjugating enzyme ATG10; K17888 ubiquitin-like-conjugating enzyme ATG10	NA
S.schlegelii_GLEAN_10018788	5.09629	4.46742	0.000642205	0.0100802	gi|734600748|ref|XP_010755478.1|/0/PREDICTED: proline-rich protein 5-like [Larimichthys crocea]	Q8AVJ1/2e-144/ PRR5_XENLA Proline-rich protein 5 OS=Xenopus laevis GN=prr5 PE=2 SV=1	lcf:108894949/0.0/proline-rich protein 5-like; K20411 proline-rich protein 5	NA
S.schlegelii_GLEAN_10005876	5.09702	4.46781	0.000639337	0.0100664	gi|657596935|ref|XP_008303192.1|/7.27969e-129/PREDICTED: uncharacterized protein C1orf50 homolog [Stegastes partitus]	Q502G5/2e-112/ CA050_DANRE Uncharacterized protein C1orf50 homolog OS=Danio rerio GN=zgc:112255 PE=2 SV=1	NA	NA
S.schlegelii_GLEAN_10014756	5.09704	4.46778	0.000702841	0.0104778	gi|734604641|ref|XP_010729383.1|/0/PREDICTED: transcription factor MafB-like [Larimichthys crocea]	O75444/3e-47/ MAF_HUMAN Transcription factor Maf OS=Homo sapiens GN=MAF PE=1 SV=2	ola:105353878/0.0/transcription factor MafA-like; K07595 transcription factor MAFA	biological_process:GO:0006355//regulation of transcription, DNA-templated;GO:0007468//regulation of rhodopsin gene expression;GO:0046548//retinal rod cell development;cellular_component:GO:0005634//nucleus;molecular_function:GO:0003677//DNA binding;GO:0003700//sequence-specific DNA binding transcription factor activity;GO:0043565//sequence-specific DNA binding;
S.schlegelii_GLEAN_10003016	5.09828	4.46852	0.00068857	0.0103353	gi|657555018|ref|XP_008281990.1|/0/PREDICTED: dnaJ homolog subfamily A member 3, mitochondrial isoform X2 [Stegastes partitus]	Q96EY1/0.0/ DNJA3_HUMAN DnaJ homolog subfamily A member 3, mitochondrial OS=Homo sapiens GN=DNAJA3 PE=1 SV=2	lco:104925697/0.0/dnaja3; dnaJ homolog subfamily A member 3, mitochondrial; K09504 DnaJ homolog subfamily A member 3	molecular_function:GO:0031072//heat shock protein binding;GO:0051082//unfolded protein binding;
S.schlegelii_GLEAN_10002097	5.0995	4.46909	0.000683264	0.0102908	gi|657539513|ref|XP_008275921.1|/3.3198e-109/PREDICTED: interleukin-5 receptor subunit alpha-like [Stegastes partitus] &gt;gi|657597596|ref|XP_008303544.1| PREDICTED: interleukin-5 receptor subunit alpha-like [Stegastes partitus]	P15509/1e-11/ CSF2R_HUMAN Granulocyte-macrophage colony-stimulating factor receptor subunit alpha OS=Homo sapiens GN=CSF2RA PE=1 SV=1	hcq:109520534/9e-103/granulocyte-macrophage colony-stimulating factor receptor subunit alpha-like; K05066 granulocyte-macrophage colony-stimulating factor receptor alpha	NA
S.schlegelii_GLEAN_10020582	5.10026	4.46951	0.000652675	0.0101125	gi|734626557|ref|XP_010741427.1|/0/PREDICTED: putative ATP-dependent RNA helicase DHX33 [Larimichthys crocea] &gt;gi|808858230|gb|KKF10644.1| putative ATP-dependent RNA helicase DHX33 [Larimichthys crocea]	F4IE66/0.0/ PRP22_ARATH Pre-mRNA-splicing factor ATP-dependent RNA helicase DEAH10 OS=Arabidopsis thaliana GN=RID1 PE=1 SV=1	lco:104928778/0.0/dhx33; DEAH-box helicase 33; K17820 ATP-dependent RNA helicase DHX33 [EC:3.6.4.13]	molecular_function:GO:0004386//helicase activity;
S.schlegelii_GLEAN_10011080	5.10029	4.46953	0.000648542	0.0101085	gi|410914403|ref|XP_003970677.1|/0/PREDICTED: aurora kinase B-like [Takifugu rubripes]	Q6NW76/0.0/ AURKB_DANRE Aurora kinase B OS=Danio rerio GN=aurkb PE=2 SV=1	lcf:108895095/0.0/LOW QUALITY PROTEIN: aurora kinase B-like; K11479 aurora kinase B [EC:2.7.11.1]	biological_process:GO:0006468//protein phosphorylation;GO:0007049//cell cycle;GO:0007067//mitotic nuclear division;GO:0031577//spindle checkpoint;GO:0032467//positive regulation of cytokinesis;GO:0043988//histone H3-S28 phosphorylation;cellular_component:GO:0032133//chromosome passenger complex;molecular_function:GO:0004672//protein kinase activity;GO:0004674//protein serine/threonine kinase acti…
S.schlegelii_GLEAN_10004806	5.10048	4.46963	0.000628896	0.0100507	gi|617417706|ref|XP_007557445.1|/0/PREDICTED: 60S ribosomal protein L3-like [Poecilia formosa]	P39023/0.0/ RL3_HUMAN 60S ribosomal protein L3 OS=Homo sapiens GN=RPL3 PE=1 SV=2	els:105013119/0.0/rpl3l; 60S ribosomal protein L3-like; K02925 large subunit ribosomal protein L3e	biological_process:GO:0006412//translation;cellular_component:GO:0005622//intracellular;GO:0005840//ribosome;molecular_function:GO:0003735//structural constituent of ribosome;
S.schlegelii_GLEAN_10007461	5.10059	4.46969	0.000657693	0.0101125	gi|734649470|ref|XP_010754022.1|/1.3549e-154/PREDICTED: protein C21orf2 [Larimichthys crocea] &gt;gi|734649472|ref|XP_010754023.1| PREDICTED: protein C21orf2 [Larimichthys crocea] &gt;gi|808884219|gb|KKF31220.1| Hypothetical protein EH28_18781 [Larimichthys crocea]	O43822/2e-81/ CU002_HUMAN Protein C21orf2 OS=Homo sapiens GN=C21orf2 PE=1 SV=1	ccar:109102187/8e-10/lrrc6; protein tilB homolog; K19753 protein TilB	molecular_function:GO:0005515//protein binding;
S.schlegelii_GLEAN_10015485	5.10124	4.47017	0.000723805	0.0107694	gi|657571280|ref|XP_008289205.1|/0/PREDICTED: traB domain-containing protein [Stegastes partitus] &gt;gi|657571282|ref|XP_008289206.1| PREDICTED: traB domain-containing protein [Stegastes partitus]	Q9H4I3/3e-155/ TRABD_HUMAN TraB domain-containing protein OS=Homo sapiens GN=TRABD PE=1 SV=1	NA	NA
S.schlegelii_GLEAN_10020242	5.10168	4.47026	0.000638099	0.0100664	gi|403947493|gb|AFR51715.1|/0/gonadotropin releasing hormone receptor [Sebastes schlegelii]	Q95MH6/1e-111/ GNRR2_CHLAE Gonadotropin-releasing hormone II receptor OS=Chlorocebus aethiops GN=GNRHR2 PE=2 SV=1	lcf:108877053/0.0/LOW QUALITY PROTEIN: gonadotropin-releasing hormone II receptor-like; K04280 gonadotropin-releasing hormone receptor	biological_process:GO:0007186//G-protein coupled receptor signaling pathway;cellular_component:GO:0016021//integral component of membrane;molecular_function:GO:0004930//G-protein coupled receptor activity;GO:0016500//protein-hormone receptor activity;
S.schlegelii_GLEAN_10007152	5.10222	4.47047	0.000367627	0.00601162	gi|734630243|ref|XP_010743453.1|/0/PREDICTED: GPI mannosyltransferase 3 [Larimichthys crocea] &gt;gi|734630245|ref|XP_010743454.1| PREDICTED: GPI mannosyltransferase 3 [Larimichthys crocea]	Q7SXZ1/0.0/ PIGB_DANRE GPI mannosyltransferase 3 OS=Danio rerio GN=pigb PE=2 SV=1	lco:104930379/0.0/pigb; phosphatidylinositol glycan anchor biosynthesis class B; K05286 phosphatidylinositol glycan, class B [EC:2.4.1.-]	molecular_function:GO:0016757//transferase activity, transferring glycosyl groups;
S.schlegelii_GLEAN_10010484	5.10265	4.47076	0.000629215	0.0100507	gi|736210278|ref|XP_010776998.1|/0/PREDICTED: ornithine carbamoyltransferase, mitochondrial [Notothenia coriiceps]	P00480/0.0/ OTC_HUMAN Ornithine carbamoyltransferase, mitochondrial OS=Homo sapiens GN=OTC PE=1 SV=3	lcf:108901069/0.0/otc; ornithine carbamoyltransferase, mitochondrial; K00611 ornithine carbamoyltransferase [EC:2.1.3.3]	biological_process:GO:0006520//cellular amino acid metabolic process;molecular_function:GO:0016597//amino acid binding;GO:0016743//carboxyl- or carbamoyltransferase activity;
S.schlegelii_GLEAN_10022124	5.10338	4.47114	0.000328507	0.00554311	gi|930753390|ref|XP_005936722.2|/0/PREDICTED: calreticulin-like [Haplochromis burtoni]	P15253/0.0/ CALR_RABIT Calreticulin OS=Oryctolagus cuniculus GN=CALR PE=1 SV=1	nfu:107383602/0.0/calreticulin-like; K08057 calreticulin	biological_process:GO:0006457//protein folding;cellular_component:GO:0005783//endoplasmic reticulum;molecular_function:GO:0005509//calcium ion binding;GO:0051082//unfolded protein binding;
S.schlegelii_GLEAN_10014182	5.10423	4.47169	0.000702083	0.0104767	gi|657582020|ref|XP_008295052.1|/0/PREDICTED: methylmalonic aciduria and homocystinuria type D protein, mitochondrial isoform X1 [Stegastes partitus]	Q9H3L0/1e-155/ MMAD_HUMAN Methylmalonic aciduria and homocystinuria type D protein, mitochondrial OS=Homo sapiens GN=MMADHC PE=1 SV=2	NA	biological_process:GO:0009235//cobalamin metabolic process;
S.schlegelii_GLEAN_10012456	5.10642	4.47269	0.000368655	0.00602202	gi|657584969|ref|XP_008296659.1|/2.11581e-130/PREDICTED: zinc finger protein 414 [Stegastes partitus]	Q32KV8/5e-32/ ZN414_BOVIN Zinc finger protein 414 OS=Bos taurus GN=ZNF414 PE=2 SV=1	NA	molecular_function:GO:0046872//metal ion binding;
S.schlegelii_GLEAN_10012277	5.11198	4.47567	0.000361012	0.0059287	gi|229366302|gb|ACQ58131.1|/8.08893e-104/60S ribosomal protein L23a [Anoplopoma fimbria]	P62752/5e-83/ RL23A_RAT 60S ribosomal protein L23a OS=Rattus norvegicus GN=Rpl23a PE=2 SV=1	bpec:110158510/2e-104/rpl23a; 60S ribosomal protein L23a; K02893 large subunit ribosomal protein L23Ae	biological_process:GO:0006412//translation;cellular_component:GO:0005840//ribosome;molecular_function:GO:0003735//structural constituent of ribosome;
S.schlegelii_GLEAN_10014066	5.11717	4.47849	0.000377285	0.00613687	gi|808870703|gb|KKF20507.1|/0/Zinc finger protein Gfi-1 [Larimichthys crocea]	O42409/2e-62/ GFI1B_CHICK Zinc finger protein Gfi-1b OS=Gallus gallus GN=GFI1B PE=2 SV=1	lco:104931375/0.0/zinc finger protein Gfi-1b-like; K09223 growth factor independent 1	biological_process:GO:0006355//regulation of transcription, DNA-templated;GO:0030097//hemopoiesis;GO:0051569//regulation of histone H3-K4 methylation;molecular_function:GO:0046872//metal ion binding;
S.schlegelii_GLEAN_10016175	5.1176	4.47868	0.000383632	0.00622035	gi|808881061|gb|KKF28749.1|/1.05455e-64/hypothetical protein EH28_05958 [Larimichthys crocea]	NA	NA	NA
S.schlegelii_GLEAN_10003415	5.11964	4.47993	0.000408505	0.00657504	gi|499020634|ref|XP_004561098.1|/3.57868e-154/PREDICTED: paired box protein Pax-1 isoform X1 [Maylandia zebra] &gt;gi|548372133|ref|XP_005732781.1| PREDICTED: paired box protein Pax-1-like [Pundamilia nyererei] &gt;gi|554838972|ref|XP_005929931.1| PREDICTED: paired box protein Pax-1-like [Haplochromis burtoni] &gt;gi|930744867|ref|XP_014191503.1| PREDICTED: paired box protein Pax-1-like [Haplochr…	P09084/1e-96/ PAX1_MOUSE Paired box protein Pax-1 OS=Mus musculus GN=Pax1 PE=1 SV=4	mze:101476349/7e-155/pax1; paired box protein Pax-1; K09382 paired box protein 1/9	biological_process:GO:0006355//regulation of transcription, DNA-templated;molecular_function:GO:0003677//DNA binding;
S.schlegelii_GLEAN_10017375	5.12813	4.48422	0.000394465	0.0063691	gi|736299458|ref|XP_010792566.1|/0/PREDICTED: phosphoinositide 3-kinase regulatory subunit 6 [Notothenia coriiceps]	Q5UE93/1e-158/ PI3R6_HUMAN Phosphoinositide 3-kinase regulatory subunit 6 OS=Homo sapiens GN=PIK3R6 PE=1 SV=1	ncc:104965306/0.0/pik3r6; phosphoinositide 3-kinase regulatory subunit 6; K21290 phosphoinositide-3-kinase regulatory subunit 5/6	cellular_component:GO:0005944//phosphatidylinositol 3-kinase complex, class IB;molecular_function:GO:0046935//1-phosphatidylinositol-3-kinase regulator activity;
S.schlegelii_GLEAN_10021335	5.13001	4.48529	0.000380121	0.00616993	gi|736178779|ref|XP_010768039.1|/0/PREDICTED: otopetrin-2-like [Notothenia coriiceps]	Q80SX5/8e-157/ OTOP2_MOUSE Otopetrin-2 OS=Mus musculus GN=Otop2 PE=2 SV=1	gja:107109672/2e-40/PDZD7; PDZ domain containing 7; K21882 PDZ domain-containing protein 7	NA
S.schlegelii_GLEAN_10006236	5.13057	4.4855	0.00036074	0.0059287	gi|808859585|gb|KKF11691.1|/9.57155e-163/Nuclear speckle splicing regulatory protein 1 [Larimichthys crocea]	Q568R1/6e-113/ NSRP1_DANRE Nuclear speckle splicing regulatory protein 1 OS=Danio rerio GN=nsrp1 PE=1 SV=2	lco:109136793/2e-163/nuclear speckle splicing regulatory protein 1-like; K13206 coiled-coil domain-containing protein 55	NA
S.schlegelii_GLEAN_10022248	5.13248	4.48654	0.000337317	0.00564819	gi|808866621|gb|KKF17302.1|/1.49633e-161/Cyclin-dependent kinase 5 [Larimichthys crocea]	P51166/1e-158/ CDK5_XENLA Cyclin-dependent-like kinase 5 OS=Xenopus laevis GN=cdk5 PE=2 SV=1	lcf:108883365/2e-160/cdk5; cyclin-dependent-like kinase 5; K02090 cyclin-dependent kinase 5 [EC:2.7.11.22]	biological_process:GO:0006468//protein phosphorylation;molecular_function:GO:0004672//protein kinase activity;GO:0005524//ATP binding;
S.schlegelii_GLEAN_10010689	5.13635	4.4885	0.000367185	0.0060108	gi|768948949|ref|XP_011613663.1|/0/PREDICTED: UDP-glucuronosyltransferase 2A2-like isoform X1 [Takifugu rubripes]	Q9GLD9/5e-134/ UDB33_MACMU UDP-glucuronosyltransferase 2B33 OS=Macaca mulatta GN=UGT2B33 PE=1 SV=1	tru:101068548/0.0/UDP-glucuronosyltransferase 2A2-like; K00699 glucuronosyltransferase [EC:2.4.1.17]	biological_process:GO:0008152//metabolic process;molecular_function:GO:0016758//transferase activity, transferring hexosyl groups;
S.schlegelii_GLEAN_10004974	5.14159	4.4914	0.000348261	0.00576865	gi|657589013|ref|XP_008298874.1|/0/PREDICTED: iroquois-class homeodomain protein irx-4-B-like [Stegastes partitus]	Q688D0/2e-98/ IRX4_XENTR Iroquois-class homeodomain protein irx-4 OS=Xenopus tropicalis GN=irx4 PE=2 SV=1	aqu:105312674/5e-11/flocculation protein FLO11-like; K03006 DNA-directed RNA polymerase II subunit RPB1 [EC:2.7.7.6]	biological_process:GO:0006355//regulation of transcription, DNA-templated;cellular_component:GO:0005634//nucleus;molecular_function:GO:0003677//DNA binding;GO:0043565//sequence-specific DNA binding;
S.schlegelii_GLEAN_10022628	5.14166	4.49141	0.000346575	0.00575086	gi|657578116|ref|XP_008292917.1|/0/PREDICTED: platelet-derived growth factor receptor-like protein [Stegastes partitus]	Q15198/4e-142/ PGFRL_HUMAN Platelet-derived growth factor receptor-like protein OS=Homo sapiens GN=PDGFRL PE=1 SV=1	ocu:100343352/3e-23/FLT1; fms related tyrosine kinase 1; K05096 FMS-like tyrosine kinase 1 [EC:2.7.10.1]	molecular_function:GO:0005515//protein binding;
S.schlegelii_GLEAN_10001524	5.14205	4.49162	0.000380099	0.00616993	gi|974118076|ref|XP_015258581.1|/0/PREDICTED: protein Red [Cyprinodon variegatus]	Q5NVI3/0.0/ RED_PONAB Protein Red OS=Pongo abelii GN=IK PE=2 SV=1	nfu:107372919/0.0/ik; protein Red; K13109 IK cytokine	cellular_component:GO:0005634//nucleus;
S.schlegelii_GLEAN_10010573	5.14796	4.4946	0.000429915	0.00691241	gi|736252247|ref|XP_010788421.1|/0/PREDICTED: sideroflexin-2 [Notothenia coriiceps]	Q5EA43/2e-165/ SFXN2_BOVIN Sideroflexin-2 OS=Bos taurus GN=SFXN2 PE=2 SV=2	pxy:105395647/3e-08/DNA replication licensing factor Mcm6-like; K02542 DNA replication licensing factor MCM6 [EC:3.6.4.12]	biological_process:GO:0006811//ion transport;GO:0055085//transmembrane transport;cellular_component:GO:0016020//membrane;molecular_function:GO:0015075//ion transmembrane transporter activity;
S.schlegelii_GLEAN_10010244	5.15038	4.49604	0.00035609	0.005873	gi|229367000|gb|ACQ58480.1|/7.47891e-88/Probable gluconokinase [Anoplopoma fimbria]	B0BML1/4e-32/ GNTK_XENTR Probable gluconokinase OS=Xenopus tropicalis GN=idnk PE=2 SV=1	ncc:104966897/1e-82/idnk; probable gluconokinase isoform X1; K00851 gluconokinase [EC:2.7.1.12]	NA
S.schlegelii_GLEAN_10006542	5.15134	4.49659	0.000371058	0.00605483	gi|736263146|ref|XP_010790387.1|/0/PREDICTED: monocarboxylate transporter 4 [Notothenia coriiceps]	P57788/0.0/ MOT4_CHICK Monocarboxylate transporter 4 OS=Gallus gallus GN=SLC16A3 PE=2 SV=1	ncc:104963490/0.0/slc16a3; monocarboxylate transporter 4; K08180 MFS transporter, MCP family, solute carrier family 16 (monocarboxylic acid transporters), member 3	biological_process:GO:0015718//monocarboxylic acid transport;GO:0055085//transmembrane transport;cellular_component:GO:0005887//integral component of plasma membrane;GO:0016021//integral component of membrane;molecular_function:GO:0008028//monocarboxylic acid transmembrane transporter activity;GO:0015129//lactate transmembrane transporter activity;
S.schlegelii_GLEAN_10018744	5.15137	4.49661	0.000345987	0.00574984	gi|736217681|ref|XP_010779001.1|/6.14421e-136/PREDICTED: spermatogenesis-associated protein 4 [Notothenia coriiceps]	Q8NEY3/2e-61/ SPAT4_HUMAN Spermatogenesis-associated protein 4 OS=Homo sapiens GN=SPATA4 PE=1 SV=1	NA	NA
S.schlegelii_GLEAN_10019437	5.15285	4.49736	0.00035512	0.00587274	gi|657565728|ref|XP_008286177.1|/0/PREDICTED: bone morphogenetic protein 2 [Stegastes partitus]	Q804S2/0.0/ BMP2_TETNG Bone morphogenetic protein 2 OS=Tetraodon nigroviridis GN=bmp2 PE=3 SV=2	lcf:108896937/0.0/bmp2; bone morphogenetic protein 2; K21283 bone morphogenetic protein 2	biological_process:GO:0040007//growth;cellular_component:GO:0005576//extracellular region;molecular_function:GO:0008083//growth factor activity;
S.schlegelii_GLEAN_10003215	5.15297	4.49745	0.000327488	0.00553808	gi|808868428|gb|KKF18751.1|/1.88674e-131/Outcome predictor in acute leukemia 1 [Larimichthys crocea]	Q9NX94/6e-59/ WBP1L_HUMAN WW domain binding protein 1-like OS=Homo sapiens GN=WBP1L PE=1 SV=2	acs:103282658/2e-38/dact3; dishevelled binding antagonist of beta catenin 3; K22154 dapper	NA
S.schlegelii_GLEAN_10006352	5.16005	4.50131	0.000358181	0.00589482	gi|736294843|ref|XP_010790994.1|/1.73267e-145/PREDICTED: histamine N-methyltransferase A-like isoform X2 [Notothenia coriiceps]	Q4SBY6/1e-60/ HNMT_TETNG Histamine N-methyltransferase OS=Tetraodon nigroviridis GN=hnmt PE=3 SV=1	lcf:108886889/2e-151/histamine N-methyltransferase A-like isoform X1; K00546 histamine N-methyltransferase [EC:2.1.1.8]	NA
S.schlegelii_GLEAN_10001615	5.16173	4.50211	0.00035816	0.00589482	gi|657594838|ref|XP_008302053.1|/0/PREDICTED: sequestosome-1 isoform X2 [Stegastes partitus]	O08623/8e-117/ SQSTM_RAT Sequestosome-1 OS=Rattus norvegicus GN=Sqstm1 PE=1 SV=1	lco:104938308/0.0/sqstm1; sequestosome 1; K14381 sequestosome 1	molecular_function:GO:0005515//protein binding;GO:0008270//zinc ion binding;
S.schlegelii_GLEAN_10002756	5.16229	4.50244	0.000346002	0.00574984	gi|736198576|ref|XP_010773816.1|/0/PREDICTED: probable ATP-dependent RNA helicase DHX40 [Notothenia coriiceps]	Q8IX18/0.0/ DHX40_HUMAN Probable ATP-dependent RNA helicase DHX40 OS=Homo sapiens GN=DHX40 PE=1 SV=2	ncc:104949204/0.0/dhx40; probable ATP-dependent RNA helicase DHX40; K18711 ATP-dependent RNA helicase DHX40 [EC:3.6.4.13]	molecular_function:GO:0003676//nucleic acid binding;GO:0004386//helicase activity;GO:0005524//ATP binding;GO:0008026//ATP-dependent helicase activity;
S.schlegelii_GLEAN_10002723	5.16238	4.50246	0.00035531	0.00587274	gi|657596921|ref|XP_008303185.1|/1.5037e-111/PREDICTED: testicular haploid expressed gene protein-like [Stegastes partitus]	Q5XHX8/2e-14/ THEG_RAT Testicular haploid expressed gene protein OS=Rattus norvegicus GN=Theg PE=1 SV=2	xma:102226847/3e-42/interleukin-6 receptor subunit beta-like; K05060 interleukin 6 signal transducer	NA
S.schlegelii_GLEAN_10018966	5.16391	4.50333	0.000386294	0.00625691	gi|808879334|gb|KKF27392.1|/0/Methyltransferase-like protein 21C [Larimichthys crocea]	A6QP81/1e-75/ MT21C_BOVIN Protein-lysine methyltransferase METTL21C OS=Bos taurus GN=METTL21C PE=2 SV=1	lcf:108888033/0.0/uncharacterized protein LOC108888033; K21805 protein N-lysine methyltransferase METTL21C [EC:2.1.1.-]	NA
S.schlegelii_GLEAN_10004419	5.16472	4.50374	0.000346812	0.00575086	gi|961886207|ref|XP_014852154.1|/0/PREDICTED: disks large-associated protein 2-like isoform X4 [Poecilia mexicana]	P97837/0.0/ DLGP2_RAT Disks large-associated protein 2 OS=Rattus norvegicus GN=Dlgap2 PE=1 SV=3	ccar:109079041/5e-127/disks large-associated protein 1-like; K15008 discs, large-associated protein 1	biological_process:GO:0007270//neuron-neuron synaptic transmission;GO:0023052//signaling;
S.schlegelii_GLEAN_10012378	5.16563	4.50423	0.000342071	0.00570924	gi|657583061|ref|XP_008295619.1|/5.32589e-147/PREDICTED: gamma-crystallin N-A-like [Stegastes partitus]	Q5XTN8/3e-47/ CRGNA_DANRE Gamma-crystallin N-A OS=Danio rerio GN=crygna PE=2 SV=1	bacu:103015945/5e-36/TBCCD1; TBCC domain containing 1; K16810 TBCC domain-containing protein 1	NA
S.schlegelii_GLEAN_10008964	5.16817	4.5056	0.000330377	0.005561	gi|348502465|ref|XP_003438788.1|/0/PREDICTED: cAMP-dependent protein kinase type I-alpha regulatory subunit [Oreochromis niloticus] &gt;gi|499023339|ref|XP_004562433.1| PREDICTED: cAMP-dependent protein kinase type I-alpha regulatory subunit [Maylandia zebra] &gt;gi|542215663|ref|XP_005448218.1| PREDICTED: cAMP-dependent protein kinase type I-alpha regulatory subunit [Oreochromis niloticus] &gt;g…	P00514/0.0/ KAP0_BOVIN cAMP-dependent protein kinase type I-alpha regulatory subunit OS=Bos taurus GN=PRKAR1A PE=1 SV=2	hcq:109516312/0.0/prkar1a; cAMP-dependent protein kinase type I-alpha regulatory subunit; K04739 cAMP-dependent protein kinase regulator	NA
S.schlegelii_GLEAN_10016309	5.16852	4.50617	0.00043271	0.00695006	gi|657572260|ref|XP_008289737.1|/0/PREDICTED: 52 kDa repressor of the inhibitor of the protein kinase-like [Stegastes partitus]	O43422/0.0/ P52K_HUMAN 52 kDa repressor of the inhibitor of the protein kinase OS=Homo sapiens GN=THAP12 PE=1 SV=2	hmg:100196989/8e-08/zinc finger MYM-type protein 1-like; K14829 pre-rRNA-processing protein IPI3	molecular_function:GO:0003676//nucleic acid binding;
S.schlegelii_GLEAN_10016674	5.17211	4.50771	0.000362122	0.00594058	gi|657577984|ref|XP_008292845.1|/0/PREDICTED: leucine zipper transcription factor-like protein 1 [Stegastes partitus]	Q562C6/1e-134/ LZTL1_RAT Leucine zipper transcription factor-like protein 1 OS=Rattus norvegicus GN=Lztfl1 PE=2 SV=1	lco:104932190/4e-180/lztfl1; leucine zipper transcription factor like 1; K19400 leucine zipper transcription factor-like protein 1	NA
S.schlegelii_GLEAN_10005281	5.17251	4.50797	0.000364266	0.00596937	gi|734646286|ref|XP_010752275.1|/0/PREDICTED: uncharacterized protein LOC104937682, partial [Larimichthys crocea]	Q4P9K9/1e-17/ CHS8_USTMA Chitin synthase 8 OS=Ustilago maydis (strain 521 / FGSC 9021) GN=CHS8 PE=3 SV=1	csem:103393822/0.0/LOW QUALITY PROTEIN: uncharacterized protein LOC103393822; K00698 chitin synthase [EC:2.4.1.16]	molecular_function:GO:0016758//transferase activity, transferring hexosyl groups;
S.schlegelii_GLEAN_10021565	5.17254	4.50791	0.000355943	0.005873	gi|548347385|ref|XP_005726090.1|/0/PREDICTED: beta-1,3-N-acetylglucosaminyltransferase lunatic fringe [Pundamilia nyererei]	Q8JHF2/0.0/ LFNG_DANRE Beta-1,3-N-acetylglucosaminyltransferase lunatic fringe OS=Danio rerio GN=lfng PE=2 SV=2	ncc:104964482/0.0/lfng; beta-1,3-N-acetylglucosaminyltransferase lunatic fringe; K05948 fringe [EC:2.4.1.222]	cellular_component:GO:0016020//membrane;molecular_function:GO:0016757//transferase activity, transferring glycosyl groups;
S.schlegelii_GLEAN_10016347	5.17295	4.50817	0.000330654	0.005561	gi|542201430|ref|XP_005474797.1|/0/PREDICTED: multidrug and toxin extrusion protein 1-like isoform X2 [Oreochromis niloticus]	A1L1P9/0.0/ S47A1_DANRE Multidrug and toxin extrusion protein 1 OS=Danio rerio GN=slc47a1 PE=2 SV=1	lcf:108875966/0.0/multidrug and toxin extrusion protein 1-like; K03327 multidrug resistance protein, MATE family	biological_process:GO:0006855//drug transmembrane transport;GO:0055085//transmembrane transport;cellular_component:GO:0016020//membrane;molecular_function:GO:0015238//drug transmembrane transporter activity;GO:0015297//antiporter activity;
S.schlegelii_GLEAN_10014011	5.17429	4.50888	0.000337678	0.00564819	gi|808865584|gb|KKF16436.1|/6.89039e-126/Transforming protein p29 [Larimichthys crocea]	P20171/2e-103/ RASH_RAT GTPase HRas OS=Rattus norvegicus GN=Hras PE=1 SV=2	lco:104930345/1e-126/GTPase HRas; K07827 GTPase KRas	biological_process:GO:0007165//signal transduction;GO:0007264//small GTPase mediated signal transduction;GO:0015031//protein transport;cellular_component:GO:0005622//intracellular;GO:0016020//membrane;molecular_function:GO:0005525//GTP binding;
S.schlegelii_GLEAN_10009048	5.17978	4.51172	0.000397728	0.0064083	gi|808875012|gb|KKF23983.1|/3.22033e-153/NEDD4 family-interacting protein 1 [Larimichthys crocea]	Q6GLN5/5e-111/ NFIP1_XENLA NEDD4 family-interacting protein 1 OS=Xenopus laevis GN=ndfip1 PE=2 SV=1	NA	biological_process:GO:0007034//vacuolar transport;GO:0030001//metal ion transport;
S.schlegelii_GLEAN_10020310	5.18183	4.51295	0.000345633	0.00574984	gi|657588677|ref|XP_008298690.1|/0/PREDICTED: cathepsin B [Stegastes partitus]	P43233/1e-180/ CATB_CHICK Cathepsin B OS=Gallus gallus GN=CTSB PE=2 SV=1	bpec:110172821/0.0/ctsb; cathepsin B; K01363 cathepsin B [EC:3.4.22.1]	biological_process:GO:0006508//proteolysis;GO:0050790//regulation of catalytic activity;molecular_function:GO:0004197//cysteine-type endopeptidase activity;GO:0008234//cysteine-type peptidase activity;
S.schlegelii_GLEAN_10007740	5.18468	4.51449	0.000329594	0.00555534	gi|657584040|ref|XP_008296156.1|/0/PREDICTED: calpain-7 [Stegastes partitus]	Q9R1S8/0.0/ CAN7_MOUSE Calpain-7 OS=Mus musculus GN=Capn7 PE=2 SV=1	lcf:108884652/0.0/calpain-7-like; K08576 calpain-7 [EC:3.4.22.-]	biological_process:GO:0006508//proteolysis;cellular_component:GO:0005622//intracellular;molecular_function:GO:0004198//calcium-dependent cysteine-type endopeptidase activity;
S.schlegelii_GLEAN_10007308	5.18686	4.51566	0.000372321	0.006069	gi|734629783|ref|XP_010743201.1|/0/PREDICTED: dnaJ homolog subfamily A member 1 [Larimichthys crocea]	Q5E954/0.0/ DNJA1_BOVIN DnaJ homolog subfamily A member 1 OS=Bos taurus GN=DNAJA1 PE=2 SV=2	lco:104930178/0.0/dnaja1, DnaJ; DnaJ heat shock protein family (Hsp40) member A1; K09502 DnaJ homolog subfamily A member 1	molecular_function:GO:0031072//heat shock protein binding;GO:0051082//unfolded protein binding;
S.schlegelii_GLEAN_10004868	5.18711	4.5158	0.000333275	0.00559283	gi|765146643|ref|XP_011484091.1|/0/PREDICTED: bromodomain-containing protein 2-like isoform X1 [Oryzias latipes]	Q7JJ13/0.0/ BRD2_MOUSE Bromodomain-containing protein 2 OS=Mus musculus GN=Brd2 PE=1 SV=1	lco:104928643/0.0/bromodomain-containing protein 2; K08871 bromodomain-containing protein 2	molecular_function:GO:0005515//protein binding;
S.schlegelii_GLEAN_10004701	5.19478	4.51992	0.000375819	0.00611951	gi|734603271|ref|XP_010728635.1|/2.72879e-132/PREDICTED: U2 small nuclear ribonucleoprotein B&apos;&apos; [Larimichthys crocea]	Q9CQI7/7e-115/ RU2B_MOUSE U2 small nuclear ribonucleoprotein B'' OS=Mus musculus GN=Snrpb2 PE=1 SV=1	lco:104918546/5e-133/snrpb2; small nuclear ribonucleoprotein polypeptide B2; K11094 U2 small nuclear ribonucleoprotein B''	biological_process:GO:0000398//mRNA splicing, via spliceosome;molecular_function:GO:0003676//nucleic acid binding;GO:0017069//snRNA binding;
S.schlegelii_GLEAN_10021733	5.19729	4.52132	0.000326426	0.00552621	gi|736243072|ref|XP_010785561.1|/0/PREDICTED: prostaglandin E2 receptor EP4 subtype-like [Notothenia coriiceps]	P32240/1e-165/ PE2R4_MOUSE Prostaglandin E2 receptor EP4 subtype OS=Mus musculus GN=Ptger4 PE=2 SV=1	ncc:104959373/0.0/prostaglandin E2 receptor EP4 subtype-like; K04261 prostaglandin E receptor 4	biological_process:GO:0007186//G-protein coupled receptor signaling pathway;cellular_component:GO:0016021//integral component of membrane;molecular_function:GO:0004930//G-protein coupled receptor activity;GO:0004955//prostaglandin receptor activity;GO:0004957//prostaglandin E receptor activity;
S.schlegelii_GLEAN_10020327	5.20502	4.5255	0.000332269	0.00558204	gi|808858773|gb|KKF11096.1|/0/Programmed cell death protein 2 [Larimichthys crocea]	Q2YDC9/7e-121/ PDCD2_BOVIN Programmed cell death protein 2 OS=Bos taurus GN=PDCD2 PE=2 SV=1	lco:104920165/0.0/pdcd2; programmed cell death 2; K14801 pre-rRNA-processing protein TSR4	cellular_component:GO:0005737//cytoplasm;
S.schlegelii_GLEAN_10002261	5.20977	4.52812	0.00039573	0.00638281	gi|657586774|ref|XP_008297650.1|/0/PREDICTED: collagenase 3-like [Stegastes partitus]	O62806/4e-150/ MMP13_RABIT Collagenase 3 OS=Oryctolagus cuniculus GN=MMP13 PE=2 SV=1	lcf:108893138/0.0/collagenase 3-like; K07994 matrix metalloproteinase-13 (collagenase 3) [EC:3.4.24.-]	biological_process:GO:0006508//proteolysis;cellular_component:GO:0031012//extracellular matrix;molecular_function:GO:0004222//metalloendopeptidase activity;GO:0008237//metallopeptidase activity;GO:0008270//zinc ion binding;
S.schlegelii_GLEAN_10015524	5.21472	4.53079	0.000177878	0.00314668	gi|584001605|ref|XP_006795839.1|/0/PREDICTED: probable polypeptide N-acetylgalactosaminyltransferase 8-like [Neolamprologus brichardi]	Q9NY28/0.0/ GALT8_HUMAN Probable polypeptide N-acetylgalactosaminyltransferase 8 OS=Homo sapiens GN=GALNT8 PE=2 SV=1	lcf:108901830/0.0/probable polypeptide N-acetylgalactosaminyltransferase 8; K00710 polypeptide N-acetylgalactosaminyltransferase [EC:2.4.1.41]	NA
S.schlegelii_GLEAN_10023301	5.21559	4.53128	0.000191561	0.00331241	gi|401664002|dbj|BAM36382.1|/1.37554e-118/Kruppel-like factor 9 [Oplegnathus fasciatus]	Q01713/3e-57/ KLF9_RAT Krueppel-like factor 9 OS=Rattus norvegicus GN=Klf9 PE=2 SV=1	lco:104922802/5e-115/klf9; Kruppel like factor 9; K09208 krueppel-like factor 9/13/14/16	molecular_function:GO:0046872//metal ion binding;
S.schlegelii_GLEAN_10018100	5.21781	4.53248	0.000178999	0.0031556	gi|928036144|ref|XP_013866676.1|/6.00977e-96/PREDICTED: sorting nexin-10A-like [Austrofundulus limnaeus]	F1Q506/3e-81/ SNXAA_DANRE Sorting nexin-10A OS=Danio rerio GN=snx10a PE=1 SV=1	lcf:108877418/8e-94/sorting nexin-10A-like isoform X1; K17924 sorting nexin-10/11	molecular_function:GO:0035091//phosphatidylinositol binding;
S.schlegelii_GLEAN_10010458	5.21813	4.53267	0.00024987	0.0042489	gi|736213914|ref|XP_010778026.1|/0/PREDICTED: Na(+)/H(+) exchange regulatory cofactor NHE-RF3 [Notothenia coriiceps] &gt;gi|736213918|ref|XP_010778027.1| PREDICTED: Na(+)/H(+) exchange regulatory cofactor NHE-RF3 [Notothenia coriiceps]	Q5RCF7/6e-123/ NHRF3_PONAB Na(+)/H(+) exchange regulatory cofactor NHE-RF3 OS=Pongo abelii GN=PDZK1 PE=2 SV=1	dre:100535100/2e-36/Na(+)/H(+) exchange regulatory cofactor NHE-RF2-like; K13358 Na(+)/H(+) exchange regulatory cofactor NHE-RF2	molecular_function:GO:0005515//protein binding;
S.schlegelii_GLEAN_10011537	5.2182	4.5328	0.000207336	0.00355714	gi|657539516|ref|XP_008275922.1|/0/PREDICTED: patched domain-containing protein 3-like [Stegastes partitus]	Q0EEE2/6e-127/ PTHD3_MOUSE Patched domain-containing protein 3 OS=Mus musculus GN=Ptchd3 PE=1 SV=1	pvt:110074931/2e-32/NPC1; Niemann-Pick C1 protein; K12385 Niemann-Pick C1 protein	cellular_component:GO:0016020//membrane;molecular_function:GO:0008158//hedgehog receptor activity;
S.schlegelii_GLEAN_10022171	5.22237	4.53496	0.000178889	0.0031556	gi|808883881|gb|KKF30942.1|/4.40825e-135/BAG family molecular chaperone regulator 1 [Larimichthys crocea]	Q99933/7e-78/ BAG1_HUMAN BAG family molecular chaperone regulator 1 OS=Homo sapiens GN=BAG1 PE=1 SV=4	lco:104922584/8e-136/bag1; BAG family molecular chaperone regulator 1; K09555 BCL2-associated athanogene 1	molecular_function:GO:0005515//protein binding;GO:0051087//chaperone binding;
S.schlegelii_GLEAN_10019400	5.22608	4.53699	0.000212345	0.00363497	gi|942095858|ref|XP_014338239.1|/0/PREDICTED: LOW QUALITY PROTEIN: heat shock protein HSP 90-alpha-like [Bos mutus]	P30946/0.0/ HS90A_RABIT Heat shock protein HSP 90-alpha OS=Oryctolagus cuniculus GN=HSP90AA1 PE=1 SV=2	hai:109381021/0.0/HSP90AA1; heat shock protein 90 alpha family class A member 1; K04079 molecular chaperone HtpG	biological_process:GO:0006457//protein folding;GO:0006950//response to stress;molecular_function:GO:0005524//ATP binding;GO:0051082//unfolded protein binding;
S.schlegelii_GLEAN_10022555	5.22685	4.53743	0.000204769	0.00352097	gi|941818086|ref|XP_014330519.1|/0/PREDICTED: LOW QUALITY PROTEIN: protocadherin-18 [Xiphophorus maculatus]	Q9HCL0/0.0/ PCD18_HUMAN Protocadherin-18 OS=Homo sapiens GN=PCDH18 PE=2 SV=3	xma:102229972/0.0/pcdh18; protocadherin 18; K16499 protocadherin delta 2	biological_process:GO:0007155//cell adhesion;GO:0007156//homophilic cell adhesion via plasma membrane adhesion molecules;GO:0007399//nervous system development;cellular_component:GO:0005886//plasma membrane;GO:0016020//membrane;molecular_function:GO:0005509//calcium ion binding;
S.schlegelii_GLEAN_10022178	5.22982	4.53904	0.000174568	0.00310601	gi|908520490|ref|XP_013124308.1|/0/PREDICTED: oxygen-regulated protein 1-like [Oreochromis niloticus]	Q8MJ05/1e-78/ RP1_BOVIN Oxygen-regulated protein 1 OS=Bos taurus GN=RP1 PE=2 SV=1	lcf:108883235/0.0/oxygen-regulated protein 1-like; K19538 retinitis pigmentosa 1	biological_process:GO:0035556//intracellular signal transduction;
S.schlegelii_GLEAN_10017580	5.23063	4.53948	0.000179709	0.00316067	gi|348544909|ref|XP_003459923.1|/0/PREDICTED: histone-lysine N-methyltransferase SUV39H1 [Oreochromis niloticus]	Q5RB81/0.0/ SUV91_PONAB Histone-lysine N-methyltransferase SUV39H1 OS=Pongo abelii GN=SUV39H1 PE=2 SV=1	mze:101475727/0.0/suv39h1; suppressor of variegation 3-9 homolog 1; K11419 histone-lysine N-methyltransferase SUV39H [EC:2.1.1.43]	biological_process:GO:0034968//histone lysine methylation;cellular_component:GO:0005634//nucleus;molecular_function:GO:0005515//protein binding;GO:0008270//zinc ion binding;GO:0018024//histone-lysine N-methyltransferase activity;
S.schlegelii_GLEAN_10013081	5.23223	4.54036	0.000174143	0.00310205	gi|657587261|ref|XP_008297914.1|/0/PREDICTED: 26S proteasome non-ATPase regulatory subunit 2 [Stegastes partitus]	Q13200/0.0/ PSMD2_HUMAN 26S proteasome non-ATPase regulatory subunit 2 OS=Homo sapiens GN=PSMD2 PE=1 SV=3	lco:104920890/0.0/psmd2; proteasome 26S subunit, non-ATPase 2; K03028 26S proteasome regulatory subunit N1	NA
S.schlegelii_GLEAN_10023704	5.23243	4.54042	0.000188359	0.00327919	gi|808876162|gb|KKF24823.1|/0/putative ATP-dependent RNA helicase DHX37 [Larimichthys crocea]	Q8IY37/1e-127/ DHX37_HUMAN Probable ATP-dependent RNA helicase DHX37 OS=Homo sapiens GN=DHX37 PE=1 SV=1	lco:104921651/0.0/dhx37; DEAH-box helicase 37; K14780 ATP-dependent RNA helicase DHX37/DHR1 [EC:3.6.4.13]	molecular_function:GO:0004386//helicase activity;
S.schlegelii_GLEAN_10002757	5.23703	4.54299	0.000189481	0.00328383	gi|808872227|gb|KKF21711.1|/0/Zona pellucida sperm-binding protein 4 [Larimichthys crocea]	Q8CH34/1e-40/ ZP4_RAT Zona pellucida sperm-binding protein 4 OS=Rattus norvegicus GN=Zp4 PE=2 SV=1	cmk:103183312/4e-40/zona pellucida sperm-binding protein 4-like; K19926 zona pellucida sperm-binding protein 1	NA
S.schlegelii_GLEAN_10004798	5.23766	4.54337	0.000189461	0.00328383	gi|657565670|ref|XP_008286145.1|/1.3881e-153/PREDICTED: glucose-induced degradation protein 4 homolog isoform X1 [Stegastes partitus]	Q9CPY6/4e-135/ GID4_MOUSE Glucose-induced degradation protein 4 homolog OS=Mus musculus GN=Gid4 PE=1 SV=1	NA	NA
S.schlegelii_GLEAN_10012316	5.24038	4.54493	0.000204448	0.00351939	gi|961797493|ref|XP_014849393.1|/4.45263e-177/PREDICTED: peroxiredoxin-4-like [Poecilia mexicana]	O08807/1e-153/ PRDX4_MOUSE Peroxiredoxin-4 OS=Mus musculus GN=Prdx4 PE=1 SV=1	nfu:107386417/5e-178/peroxiredoxin-4-like; K03386 peroxiredoxin (alkyl hydroperoxide reductase subunit C) [EC:1.11.1.15]	biological_process:GO:0055114//oxidation-reduction process;molecular_function:GO:0016209//antioxidant activity;GO:0016491//oxidoreductase activity;GO:0051920//peroxiredoxin activity;
S.schlegelii_GLEAN_10021506	5.24319	4.54648	0.000212965	0.00363745	gi|657577283|ref|XP_008292464.1|/2.23609e-130/PREDICTED: melanoregulin-like [Stegastes partitus]	Q6GQM0/2e-108/ MREG_DANRE Melanoregulin OS=Danio rerio GN=mreg PE=2 SV=1	NA	biological_process:GO:0032402//melanosome transport;cellular_component:GO:0042470//melanosome;
S.schlegelii_GLEAN_10012421	5.24553	4.54757	0.000207571	0.0035572	gi|742084869|ref|XP_010875820.1|/0/PREDICTED: microfibrillar-associated protein 1 [Esox lucius]	Q5EA98/0.0/ MFAP1_BOVIN Microfibrillar-associated protein 1 OS=Bos taurus GN=MFAP1 PE=2 SV=1	els:105014864/0.0/mfap1; microfibrillar-associated protein 1; K13110 microfibrillar-associated protein 1	NA
S.schlegelii_GLEAN_10012142	5.25258	4.55155	0.000178192	0.00314861	gi|768943662|ref|XP_011611485.1|/1.21988e-132/PREDICTED: ras-related protein Rap-1b [Takifugu rubripes]	Q6TEN1/1e-126/ RAP1B_DANRE Ras-related protein Rap-1b OS=Danio rerio GN=rap1b PE=2 SV=1	tru:101070080/2e-133/ras-related protein Rap-1b; K07836 Ras-related protein Rap-1B	biological_process:GO:0006886//intracellular protein transport;GO:0006913//nucleocytoplasmic transport;GO:0007165//signal transduction;GO:0007264//small GTPase mediated signal transduction;GO:0015031//protein transport;cellular_component:GO:0005622//intracellular;GO:0016020//membrane;molecular_function:GO:0003924//GTPase activity;GO:0005525//GTP binding;
S.schlegelii_GLEAN_10001673	5.25344	4.55198	0.000185464	0.00323982	gi|229367240|gb|ACQ58600.1|/8.93423e-178/TIP41-like protein [Anoplopoma fimbria]	Q5FW12/2e-135/ TIPRL_XENTR TIP41-like protein OS=Xenopus tropicalis GN=tiprl PE=2 SV=1	mze:101468679/1e-177/tiprl; TOR signaling pathway regulator; K17607 type 2A phosphatase activator TIP41	NA
S.schlegelii_GLEAN_10015650	5.25694	4.55399	0.00018878	0.00328098	gi|808862299|gb|KKF13888.1|/5.44174e-173/Proteasome subunit alpha type-5, partial [Larimichthys crocea]	Q9Z2U1/8e-167/ PSA5_MOUSE Proteasome subunit alpha type-5 OS=Mus musculus GN=Psma5 PE=1 SV=1	bpec:110168438/9e-173/psma5; proteasome subunit alpha type-5; K02729 20S proteasome subunit alpha 5 [EC:3.4.25.1]	biological_process:GO:0006511//ubiquitin-dependent protein catabolic process;GO:0051603//proteolysis involved in cellular protein catabolic process;cellular_component:GO:0005839//proteasome core complex;GO:0019773//proteasome core complex, alpha-subunit complex;molecular_function:GO:0004175//endopeptidase activity;GO:0004298//threonine-type endopeptidase activity;
S.schlegelii_GLEAN_10008143	5.25765	4.55428	0.000212817	0.00363745	gi|929246718|ref|XP_013999457.1|/0/PREDICTED: serine/threonine-protein kinase Nek2-like [Salmo salar]	P51955/0.0/ NEK2_HUMAN Serine/threonine-protein kinase Nek2 OS=Homo sapiens GN=NEK2 PE=1 SV=1	lcf:108895981/0.0/nek2; serine/threonine-protein kinase Nek2 isoform X1; K20872 NIMA (never in mitosis gene a)-related kinase 2 [EC:2.7.11.1]	biological_process:GO:0006468//protein phosphorylation;molecular_function:GO:0004672//protein kinase activity;GO:0005524//ATP binding;
S.schlegelii_GLEAN_10005674	5.25987	4.55492	0.000258373	0.00438862	gi|928078195|ref|XP_013889133.1|/0/PREDICTED: transcriptional repressor scratch 1-like [Austrofundulus limnaeus]	Q99M85/1e-120/ SCRT1_MOUSE Transcriptional repressor scratch 1 OS=Mus musculus GN=Scrt1 PE=1 SV=1	nfu:107391295/0.0/transcriptional repressor scratch 1-like; K09219 scratch	molecular_function:GO:0046872//metal ion binding;
S.schlegelii_GLEAN_10022213	5.26603	4.559	0.000183956	0.00322081	gi|808873287|gb|KKF22635.1|/0/Phosphotriesterase-related protein [Larimichthys crocea]	Q4RWX9/0.0/ PTER_TETNG Phosphotriesterase-related protein OS=Tetraodon nigroviridis GN=pter PE=3 SV=1	lco:104917712/0.0/pter; phosphotriesterase related; K07048 phosphotriesterase-related protein	biological_process:GO:0009056//catabolic process;molecular_function:GO:0008270//zinc ion binding;
S.schlegelii_GLEAN_10009908	5.26729	4.55967	0.000179904	0.00316067	gi|734625720|ref|XP_010740969.1|/1.17958e-164/PREDICTED: R3H domain-containing protein 4 [Larimichthys crocea]	Q2KIL7/9e-89/ R3HD4_BOVIN R3H domain-containing protein 4 OS=Bos taurus GN=R3HDM4 PE=2 SV=1	tng:GSTEN00012848G001/7e-68/unnamed protein product; K05641 ATP-binding cassette, subfamily A (ABC1), member 1	molecular_function:GO:0003676//nucleic acid binding;
S.schlegelii_GLEAN_10004804	5.27194	4.56226	0.000176113	0.00312265	gi|334362331|gb|AEG78365.1|/0/40S ribosomal protein S2 [Epinephelus coioides]	Q90YS3/6e-170/ RS2_ICTPU 40S ribosomal protein S2 OS=Ictalurus punctatus GN=rps2 PE=2 SV=1	nfu:107376551/0.0/rps2; 40S ribosomal protein S2; K02981 small subunit ribosomal protein S2e	biological_process:GO:0006412//translation;cellular_component:GO:0005840//ribosome;molecular_function:GO:0003723//RNA binding;GO:0003735//structural constituent of ribosome;
S.schlegelii_GLEAN_10010680	5.27211	4.56233	0.00018526	0.00323982	gi|542224348|ref|XP_005451550.1|/0/PREDICTED: prostaglandin E synthase 2 isoform X1 [Oreochromis niloticus]	Q7ZUC7/0.0/ PGES2_DANRE Prostaglandin E synthase 2 OS=Danio rerio GN=ptges2 PE=2 SV=1	mze:101478781/0.0/ptges2; prostaglandin E synthase 2; K05309 microsomal prostaglandin-E synthase 2 [EC:5.3.99.3]	biological_process:GO:0045454//cell redox homeostasis;molecular_function:GO:0005515//protein binding;GO:0009055//electron carrier activity;GO:0015035//protein disulfide oxidoreductase activity;
S.schlegelii_GLEAN_10022589	5.27789	4.56557	0.000185869	0.00324321	gi|734634442|ref|XP_010745755.1|/0/PREDICTED: coiled-coil domain-containing protein 37 [Larimichthys crocea]	Q4R8V8/5e-61/ CP100_MACFA Cilia- and flagella-associated protein 100 OS=Macaca fascicularis GN=CFAP100 PE=2 SV=2	smm:Smp_147450/3e-12/serine/threonine kinase; K04345 protein kinase A [EC:2.7.11.11]	NA
S.schlegelii_GLEAN_10021844	5.27798	4.56549	0.000196694	0.00338972	gi|966637545|gb|KTF72649.1|/4.46678e-103/hypothetical protein cypCar_00043125 [Cyprinus carpio]	A7M7C7/6e-43/ SKOR2_MOUSE SKI family transcriptional corepressor 2 OS=Mus musculus GN=Skor2 PE=1 SV=1	NA	biological_process:GO:0030512//negative regulation of transforming growth factor beta receptor signaling pathway;cellular_component:GO:0005634//nucleus;GO:0005737//cytoplasm;molecular_function:GO:0003714//transcription corepressor activity;GO:0046332//SMAD binding;
S.schlegelii_GLEAN_10007510	5.27992	4.5667	0.000183402	0.00321478	gi|831484526|ref|XP_012738351.1|/2.27631e-46/PREDICTED: cytochrome c oxidase assembly factor 3 homolog, mitochondrial-like [Fundulus heteroclitus]	A8KB87/5e-19/ COA3_DANRE Cytochrome c oxidase assembly factor 3 homolog, mitochondrial OS=Danio rerio GN=coa3a PE=3 SV=1	pret:103468286/4e-46/cytochrome c oxidase assembly factor 3 homolog, mitochondrial-like; K18175 cytochrome c oxidase assembly factor 3, animal type	NA
S.schlegelii_GLEAN_10023021	5.28152	4.56759	0.000176817	0.00313152	gi|808862478|gb|KKF14025.1|/0/Transforming acidic coiled-coil-containing protein 3 [Larimichthys crocea]	Q9Y6A5/2e-93/ TACC3_HUMAN Transforming acidic coiled-coil-containing protein 3 OS=Homo sapiens GN=TACC3 PE=1 SV=1	lco:104921594/0.0/tacc3; transforming acidic coiled-coil containing protein 3; K14283 transforming acidic coiled-coil-containing protein 3	NA
S.schlegelii_GLEAN_10023291	5.28198	4.56787	0.000213846	0.00364845	gi|657527222|ref|XP_008286734.1|/0/PREDICTED: metallo-beta-lactamase domain-containing protein 2 [Stegastes partitus]	Q8BL86/3e-148/ MBLC2_MOUSE Metallo-beta-lactamase domain-containing protein 2 OS=Mus musculus GN=Mblac2 PE=1 SV=2	ocu:100353303/4e-25/SEL1L; SEL1L ERAD E3 ligase adaptor subunit; K14026 SEL1 protein	NA
S.schlegelii_GLEAN_10005500	5.28741	4.57086	0.000175044	0.00310729	gi|734633754|ref|XP_010745378.1|/1.67933e-154/PREDICTED: 39S ribosomal protein L47, mitochondrial [Larimichthys crocea]	Q8K2Y7/1e-91/ RM47_MOUSE 39S ribosomal protein L47, mitochondrial OS=Mus musculus GN=Mrpl47 PE=1 SV=2	lco:104931949/4e-155/mrpl47; mitochondrial ribosomal protein L47; K17428 large subunit ribosomal protein L47	biological_process:GO:0006412//translation;cellular_component:GO:0005761//mitochondrial ribosome;molecular_function:GO:0003735//structural constituent of ribosome;
S.schlegelii_GLEAN_10021061	5.29073	4.57273	0.0001877	0.00327143	gi|801371625|ref|XP_012062509.1|/1.00408e-151/PREDICTED: actin-2, muscle-specific-like [Atta cephalotes]	Q8JJB8/5e-140/ ACTG_TRISC Actin, cytoplasmic 2 OS=Triakis scyllium GN=actg1 PE=2 SV=1	acep:105625806/2e-152/actin-2, muscle-specific-like; K05692 actin beta/gamma 1	NA
S.schlegelii_GLEAN_10009496	5.29731	4.57649	0.00019219	0.00331955	gi|657573606|ref|XP_008290473.1|/1.55167e-76/PREDICTED: complexin-3-like [Stegastes partitus]	Q0IIE0/1e-11/ CPLX3_BOVIN Complexin-3 OS=Bos taurus GN=CPLX3 PE=2 SV=1	lcf:108885904/3e-81/complexin-3-like; K15295 complexin-3/4	biological_process:GO:0006836//neurotransmitter transport;molecular_function:GO:0019905//syntaxin binding;
S.schlegelii_GLEAN_10016562	5.29776	4.57665	0.000179889	0.00316067	gi|808859729|gb|KKF11828.1|/1.55552e-137/39S ribosomal protein L44, mitochondrial [Larimichthys crocea]	Q9CY73/7e-88/ RM44_MOUSE 39S ribosomal protein L44, mitochondrial OS=Mus musculus GN=Mrpl44 PE=1 SV=3	lcf:108886328/2e-145/mrpl44; 39S ribosomal protein L44, mitochondrial; K17425 large subunit ribosomal protein L44 [EC:3.1.26.-]	NA
S.schlegelii_GLEAN_10012155	5.30273	4.57944	0.000182559	0.00320365	gi|734648299|ref|XP_010753374.1|/0/PREDICTED: probable serine racemase [Larimichthys crocea]	Q54HH2/7e-36/ SRR_DICDI Probable serine racemase OS=Dictyostelium discoideum GN=srr PE=3 SV=1	ncc:104959443/5e-121/celsr1; cadherin EGF LAG seven-pass G-type receptor 1; K04600 cadherin EGF LAG seven-pass G-type receptor 1	NA
S.schlegelii_GLEAN_10000149	5.30491	4.58064	0.000172078	0.00306882	gi|734641815|ref|XP_010749810.1|/0/PREDICTED: solute carrier family 22 member 13-like [Larimichthys crocea]	O35956/8e-52/ S22A6_RAT Solute carrier family 22 member 6 OS=Rattus norvegicus GN=Slc22a6 PE=1 SV=1	lcf:108873217/0.0/solute carrier family 22 member 13-like; K08209 MFS transporter, OCT family, solute carrier family 22 (organic cation transporter), member 13	biological_process:GO:0055085//transmembrane transport;cellular_component:GO:0016021//integral component of membrane;
S.schlegelii_GLEAN_10020492	5.30576	4.58112	0.000169306	0.00302291	gi|499013923|ref|XP_004558101.1|/0/PREDICTED: oxysterols receptor LXR-alpha [Maylandia zebra] &gt;gi|499013927|ref|XP_004558102.1| PREDICTED: oxysterols receptor LXR-alpha [Maylandia zebra] &gt;gi|499013931|ref|XP_004558103.1| PREDICTED: oxysterols receptor LXR-alpha [Maylandia zebra] &gt;gi|499013935|ref|XP_004558104.1| PREDICTED: oxysterols receptor LXR-alpha [Maylandia zebra] &gt;gi|548537198|…	Q5E9B6/0.0/ NR1H3_BOVIN Oxysterols receptor LXR-alpha OS=Bos taurus GN=NR1H3 PE=2 SV=1	mze:101487674/0.0/nr1h3; nuclear receptor subfamily 1 group H member 3; K08536 liver X receptor alpha	biological_process:GO:0006355//regulation of transcription, DNA-templated;GO:0043401//steroid hormone mediated signaling pathway;cellular_component:GO:0005634//nucleus;molecular_function:GO:0003677//DNA binding;GO:0003700//sequence-specific DNA binding transcription factor activity;GO:0003707//steroid hormone receptor activity;GO:0008270//zinc ion binding;GO:0043565//sequence-specific DNA binding;
S.schlegelii_GLEAN_10019913	5.31121	4.58419	0.000105962	0.0019439	gi|808857247|gb|KKF09854.1|/0/Cysteine/serine-rich nuclear protein 3 [Larimichthys crocea]	Q8WYN3/0.0/ CSRN3_HUMAN Cysteine/serine-rich nuclear protein 3 OS=Homo sapiens GN=CSRNP3 PE=2 SV=1	lco:104924197/0.0/csrnp3; cysteine and serine rich nuclear protein 3; K17494 cysteine/serine-rich nuclear protein	NA
S.schlegelii_GLEAN_10003539	5.31377	4.58555	0.000101768	0.00188045	gi|808872280|gb|KKF21757.1|/9.70136e-121/Solute carrier family 25 member 34 [Larimichthys crocea]	Q6PH61/1e-93/ S2534_DANRE Solute carrier family 25 member 34 OS=Danio rerio GN=slc25a34 PE=2 SV=1	lco:109140668/8e-123/solute carrier family 25 member 34-like; K15117 solute carrier family 25, member 34/35	NA
S.schlegelii_GLEAN_10012189	5.31671	4.58727	9.30796e-05	0.00177374	gi|657581135|ref|XP_008294569.1|/0/PREDICTED: phospholipase A-2-activating protein [Stegastes partitus]	Q9Y263/0.0/ PLAP_HUMAN Phospholipase A-2-activating protein OS=Homo sapiens GN=PLAA PE=1 SV=2	lco:104937611/0.0/plaa; phospholipase A2 activating protein; K14018 phospholipase A-2-activating protein	molecular_function:GO:0005515//protein binding;
S.schlegelii_GLEAN_10011554	5.31771	4.58789	0.000110403	0.0020062	gi|974062489|ref|XP_015228489.1|/3.00748e-123/PREDICTED: presqualene diphosphate phosphatase-like [Cyprinodon variegatus]	Q5TZ07/7e-70/ PLPP6_DANRE Phospholipid phosphatase 6 OS=Danio rerio GN=plpp6 PE=2 SV=1	amj:106737209/4e-18/PLPP6; dimethylaniline monooxygenase [N-oxide-forming] 5; K00485 dimethylaniline monooxygenase (N-oxide forming) [EC:1.14.13.8]	NA
S.schlegelii_GLEAN_10008962	5.31807	4.58805	9.4211e-05	0.00178311	gi|808886932|gb|KKF33426.1|/0/WD repeat-containing protein 49 [Larimichthys crocea]	Q8IV35/4e-51/ WDR49_HUMAN WD repeat-containing protein 49 OS=Homo sapiens GN=WDR49 PE=2 SV=1	ola:101172029/0.0/WD repeat-containing protein on Y chromosome-like isoform X2; K21957 pseudokinase FAM20A	molecular_function:GO:0005515//protein binding;
S.schlegelii_GLEAN_10010668	5.31855	4.58831	9.07522e-05	0.0017376	gi|930734964|ref|XP_014188977.1|/0/PREDICTED: extracellular matrix protein FRAS1 [Haplochromis burtoni]	Q86XX4/0.0/ FRAS1_HUMAN Extracellular matrix protein FRAS1 OS=Homo sapiens GN=FRAS1 PE=1 SV=2	NA	NA
S.schlegelii_GLEAN_10023055	5.32011	4.58919	9.28104e-05	0.00177252	gi|317419138|emb|CBN81175.1|/0/Pol polyprotein [Dicentrarchus labrax]	P0CT39/4e-121/ TF26_SCHPO Transposon Tf2-6 polyprotein OS=Schizosaccharomyces pombe (strain 972 / ATCC 24843) GN=Tf2-6 PE=3 SV=1	npr:108785838/1e-109/myeloperoxidase-like; K10789 myeloperoxidase [EC:1.11.2.2]	biological_process:GO:0015074//DNA integration;
S.schlegelii_GLEAN_10012281	5.32134	4.58991	0.000127312	0.00228373	gi|348518702|ref|XP_003446870.1|/1.17401e-116/PREDICTED: serine/arginine-rich splicing factor 1B isoform X1 [Oreochromis niloticus] &gt;gi|542194752|ref|XP_005472263.1| PREDICTED: serine/arginine-rich splicing factor 1B isoform X1 [Oreochromis niloticus] &gt;gi|542194755|ref|XP_005472264.1| PREDICTED: serine/arginine-rich splicing factor 1B isoform X1 [Oreochromis niloticus] &gt;gi|908490479|ref|…	Q5ZML3/4e-120/ SRSF1_CHICK Serine/arginine-rich splicing factor 1 OS=Gallus gallus GN=SRSF1 PE=1 SV=3	sfm:108921269/2e-123/serine/arginine-rich splicing factor 1B isoform X1; K12890 splicing factor, arginine/serine-rich 1	molecular_function:GO:0003676//nucleic acid binding;
S.schlegelii_GLEAN_10010595	5.32731	4.59324	8.98273e-05	0.00172412	gi|734614466|ref|XP_010734790.1|/0/PREDICTED: GLTSCR1-like protein [Larimichthys crocea]	Q6AI39/1e-78/ BICRL_HUMAN BRD4-interacting chromatin-remodeling complex-associated protein-like OS=Homo sapiens GN=BICRAL PE=1 SV=2	zne:110833515/5e-16/mucin-12-like isoform X1; K14971 nuclear receptor coactivator 6	NA
S.schlegelii_GLEAN_10016501	5.32747	4.59332	9.72308e-05	0.00181849	gi|542201258|ref|XP_005474732.1|/0/PREDICTED: probable E3 ubiquitin-protein ligase HERC6 isoform X2 [Oreochromis niloticus]	Q8IVU3/0.0/ HERC6_HUMAN Probable E3 ubiquitin-protein ligase HERC6 OS=Homo sapiens GN=HERC6 PE=2 SV=2	lcf:108890869/0.0/probable E3 ubiquitin-protein ligase HERC4; K10615 E3 ubiquitin-protein ligase HERC4 [EC:2.3.2.26]	molecular_function:GO:0004842//ubiquitin-protein transferase activity;
S.schlegelii_GLEAN_10002080	5.32749	4.59351	0.000110757	0.00200788	gi|734647445|ref|XP_010752910.1|/0/PREDICTED: lipase member H-like [Larimichthys crocea]	Q6DBU8/2e-178/ LIPH_DANRE Lipase member H OS=Danio rerio GN=liph PE=2 SV=1	lco:104938247/0.0/lipase member H-like; K19404 phosphatidic acid-selective&#160;phospholipase A1 [EC:3.1.1.-]	molecular_function:GO:0052689//carboxylic ester hydrolase activity;
S.schlegelii_GLEAN_10002691	5.32865	4.59399	9.49692e-05	0.00178927	gi|657589494|ref|XP_008299139.1|/3.5239e-156/PREDICTED: fibroleukin-like [Stegastes partitus]	P12804/9e-103/ FGL2_MOUSE Fibroleukin OS=Mus musculus GN=Fgl2 PE=1 SV=1	epa:110239347/4e-61/hemicentin-1-like; K17341 hemicentin	NA
S.schlegelii_GLEAN_10007806	5.32905	4.59424	9.07559e-05	0.0017376	gi|808868890|gb|KKF19101.1|/0/Left-right determination factor 2 [Larimichthys crocea]	O00292/3e-80/ LFTY2_HUMAN Left-right determination factor 2 OS=Homo sapiens GN=LEFTY2 PE=1 SV=2	lco:104927083/0.0/left-right determination factor 2; K04668 left-right determination factor	biological_process:GO:0016049//cell growth;GO:0040007//growth;molecular_function:GO:0005160//transforming growth factor beta receptor binding;GO:0008083//growth factor activity;
S.schlegelii_GLEAN_10009567	5.32935	4.5944	9.4892e-05	0.00178927	gi|229366236|gb|ACQ58098.1|/1.26796e-62/C-type lectin domain family 4 member C [Anoplopoma fimbria]	Q67EQ1/1e-12/ CLC4E_RAT C-type lectin domain family 4 member E OS=Rattus norvegicus GN=Clec4e PE=2 SV=1	lco:104929026/7e-50/C-type lectin domain family 4 member E-like; K17515 C-type lectin domain family 9 member A	NA
S.schlegelii_GLEAN_10023880	5.33086	4.59526	9.31054e-05	0.00177374	gi|808874117|gb|KKF23301.1|/0/Leucine-rich repeat transmembrane protein FLRT3 [Larimichthys crocea]	Q9NZU0/0.0/ FLRT3_HUMAN Leucine-rich repeat transmembrane protein FLRT3 OS=Homo sapiens GN=FLRT3 PE=1 SV=1	lco:104918231/0.0/flrt3; fibronectin leucine rich transmembrane protein 3; K16362 leucine-rich repeat transmembrane protein FLRT	molecular_function:GO:0005515//protein binding;
S.schlegelii_GLEAN_10023650	5.33238	4.59611	9.4193e-05	0.00178311	gi|736247616|ref|XP_010786983.1|/2.88606e-171/PREDICTED: cell division cycle protein 20 homolog B [Notothenia coriiceps]	Q86Y33/1e-70/ CD20B_HUMAN Cell division cycle protein 20 homolog B OS=Homo sapiens GN=CDC20B PE=1 SV=3	cmk:103177878/2e-67/cdc20b; cell division cycle 20B; K03363 cell division cycle 20, cofactor of APC complex	molecular_function:GO:0005515//protein binding;
S.schlegelii_GLEAN_10003527	5.33414	4.59687	0.000116879	0.00210395	gi|734636768|ref|XP_010747039.1|/0/PREDICTED: twinfilin-2-like [Larimichthys crocea]	Q6GMH3/0.0/ TWF2_DANRE Twinfilin-2 OS=Danio rerio GN=twf2 PE=2 SV=1	lco:104933321/0.0/twinfilin-2-like; K08870 twinfilin	biological_process:GO:0030837//negative regulation of actin filament polymerization;cellular_component:GO:0005622//intracellular;molecular_function:GO:0003779//actin binding;
S.schlegelii_GLEAN_10010153	5.3429	4.60221	0.000108799	0.00198645	gi|808884916|gb|KKF31791.1|/0/Tyrosine-protein kinase STYK1 [Larimichthys crocea]	Q6J9G0/4e-69/ STYK1_HUMAN Tyrosine-protein kinase STYK1 OS=Homo sapiens GN=STYK1 PE=1 SV=4	lco:104936376/0.0/styk1; serine/threonine/tyrosine kinase 1; K17510 tyrosine-protein kinase STYK1 [EC:2.7.10.2]	biological_process:GO:0006468//protein phosphorylation;molecular_function:GO:0004672//protein kinase activity;GO:0005524//ATP binding;
S.schlegelii_GLEAN_10022751	5.34967	4.60587	9.99834e-05	0.00185416	gi|808871841|gb|KKF21419.1|/0/Gap junction beta-1 protein [Larimichthys crocea]	Q6WGK6/4e-127/ CXB1_HORSE Gap junction beta-1 protein OS=Equus caballus GN=GJB1 PE=2 SV=1	nfu:107395772/0.0/uncharacterized protein LOC107395772; K18405 tudor domain-containing protein 1/4/6/7	biological_process:GO:0007154//cell communication;cellular_component:GO:0005922//connexon complex;
S.schlegelii_GLEAN_10008496	5.35098	4.60671	0.000108933	0.00198647	gi|808876004|gb|KKF24688.1|/0/N-acetyllactosaminide beta-1,3-N-acetylglucosaminyltransferase [Larimichthys crocea]	L7YAI7/0.0/ B4GA1_DANRE Beta-1,4-glucuronyltransferase 1 OS=Danio rerio GN=b4gat1 PE=2 SV=1	lco:104932297/0.0/b4gat1; beta-1,4-glucuronyltransferase 1; K21032 beta-1,4-glucuronyltransferase 1 [EC:2.4.1.-]	NA
S.schlegelii_GLEAN_10020187	5.35469	4.60814	0.000142066	0.00254541	gi|734595682|ref|XP_010732837.1|/0/PREDICTED: CCR4-NOT transcription complex subunit 8 [Larimichthys crocea] &gt;gi|734595684|ref|XP_010732844.1| PREDICTED: CCR4-NOT transcription complex subunit 8 [Larimichthys crocea]	Q9UFF9/0.0/ CNOT8_HUMAN CCR4-NOT transcription complex subunit 8 OS=Homo sapiens GN=CNOT8 PE=1 SV=1	lcf:108899868/0.0/cnot8; CCR4-NOT transcription complex subunit 8; K12581 CCR4-NOT transcription complex subunit 7/8	biological_process:GO:0006351//transcription, DNA-templated;cellular_component:GO:0005634//nucleus;
S.schlegelii_GLEAN_10002695	5.35703	4.60998	0.00011071	0.00200788	gi|736164465|ref|XP_010764123.1|/0/PREDICTED: armadillo repeat-containing protein 10 [Notothenia coriiceps]	B1WBW4/1e-50/ ARM10_RAT Armadillo repeat-containing protein 10 OS=Rattus norvegicus GN=Armc10 PE=1 SV=1	NA	NA
S.schlegelii_GLEAN_10013124	5.3579	4.61055	9.88236e-05	0.00184155	gi|808870081|gb|KKF20004.1|/0/Serine--tRNA ligase, mitochondrial [Larimichthys crocea]	Q9N0F3/0.0/ SYSM_BOVIN Serine--tRNA ligase, mitochondrial OS=Bos taurus GN=SARS2 PE=1 SV=1	lco:104927209/0.0/sars2; seryl-tRNA synthetase 2, mitochondrial; K01875 seryl-tRNA synthetase [EC:6.1.1.11]	biological_process:GO:0006418//tRNA aminoacylation for protein translation;GO:0006434//seryl-tRNA aminoacylation;cellular_component:GO:0005737//cytoplasm;molecular_function:GO:0000166//nucleotide binding;GO:0004812//aminoacyl-tRNA ligase activity;GO:0004828//serine-tRNA ligase activity;GO:0005524//ATP binding;
S.schlegelii_GLEAN_10009125	5.35956	4.61146	0.000101484	0.00187746	gi|736248003|ref|XP_010787123.1|/6.46125e-133/PREDICTED: ras-related protein Rap-2c [Notothenia coriiceps]	Q8BU31/5e-118/ RAP2C_MOUSE Ras-related protein Rap-2c OS=Mus musculus GN=Rap2c PE=1 SV=1	ncc:104960673/1e-133/rap2c; ras-related protein Rap-2c; K07839 Ras-related protein Rap-2C	biological_process:GO:0007165//signal transduction;GO:0007264//small GTPase mediated signal transduction;GO:0015031//protein transport;cellular_component:GO:0005622//intracellular;GO:0016020//membrane;molecular_function:GO:0005525//GTP binding;
S.schlegelii_GLEAN_10012593	5.35967	4.61159	8.91213e-05	0.00171486	gi|657568375|ref|XP_008287618.1|/0/PREDICTED: male-specific lethal 3 homolog isoform X2 [Stegastes partitus]	Q8N5Y2/0.0/ MS3L1_HUMAN Male-specific lethal 3 homolog OS=Homo sapiens GN=MSL3 PE=1 SV=1	lco:104924092/0.0/msl3; male-specific lethal 3 homolog (Drosophila); K18403 male-specific lethal 3	biological_process:GO:0006355//regulation of transcription, DNA-templated;GO:0016568//chromatin modification;cellular_component:GO:0005634//nucleus;
S.schlegelii_GLEAN_10004060	5.36092	4.61222	0.000104182	0.00191583	gi|808847616|gb|KKF08654.1|/0/Elongation of very long chain fatty acids protein 4 [Larimichthys crocea] &gt;gi|808880271|gb|KKF28188.1| Elongation of very long chain fatty acids protein 4 [Larimichthys crocea]	Q3S8M4/1e-152/ ELOV4_MACMU Elongation of very long chain fatty acids protein 4 OS=Macaca mulatta GN=ELOVL4 PE=3 SV=1	lco:109137957/0.0/elongation of very long chain fatty acids protein 4-like; K10249 elongation of very long chain fatty acids protein 4 [EC:2.3.1.199]	cellular_component:GO:0016021//integral component of membrane;
S.schlegelii_GLEAN_10004865	5.36243	4.61315	9.70932e-05	0.00181849	gi|542196464|ref|XP_005472909.1|/1.20766e-122/PREDICTED: neurogenic locus notch homolog protein 1-like [Oreochromis niloticus]	NA	sgh:107592489/2e-61/neurogenic locus notch homolog protein 1-like; K02599 Notch 1	NA
S.schlegelii_GLEAN_10020258	5.36497	4.61473	0.000106883	0.0019538	gi|657541935|ref|XP_008276784.1|/0/PREDICTED: tetraspanin-3 [Stegastes partitus]	Q5RE11/3e-149/ TSN3_PONAB Tetraspanin-3 OS=Pongo abelii GN=TSPAN3 PE=2 SV=1	lcf:108877032/0.0/tetraspanin-3; K17293 tetraspanin-3	cellular_component:GO:0016021//integral component of membrane;
S.schlegelii_GLEAN_10014562	5.36709	4.61582	9.94177e-05	0.00184792	gi|530891438|gb|AGT55554.1|/3.4922e-67/deiodinase II, partial [Sciaenops ocellatus]	P79747/1e-61/ IOD2_FUNHE Type II iodothyronine deiodinase OS=Fundulus heteroclitus GN=dio2 PE=2 SV=4	lco:104922564/6e-65/dio2; iodothyronine deiodinase 2; K17904 type II thyroxine 5'-deiodinase [EC:1.21.99.4]	biological_process:GO:0055114//oxidation-reduction process;molecular_function:GO:0004800//thyroxine 5'-deiodinase activity;
S.schlegelii_GLEAN_10008628	5.36716	4.6158	0.000106392	0.00194946	gi|808885949|gb|KKF32626.1|/9.57319e-81/hypothetical protein EH28_20897 [Larimichthys crocea]	NA	lcf:108889622/6e-88/sperm acrosome membrane-associated protein 4-like; K19894 sperm acrosome membrane-associated protein 4	NA
S.schlegelii_GLEAN_10014790	5.37149	4.61847	0.000111373	0.00201667	gi|47226777|emb|CAG06619.1|/0/unnamed protein product, partial [Tetraodon nigroviridis]	Q90805/9e-106/ CNG1_CHICK Cyclic nucleotide-gated channel cone photoreceptor subunit alpha OS=Gallus gallus PE=2 SV=1	lco:104936445/4e-141/cyclic nucleotide-gated cation channel alpha-3-like; K04950 cyclic nucleotide gated channel alpha 3	biological_process:GO:0006811//ion transport;GO:0055085//transmembrane transport;cellular_component:GO:0016020//membrane;molecular_function:GO:0005216//ion channel activity;
S.schlegelii_GLEAN_10020967	5.37162	4.6185	9.95264e-05	0.00184792	gi|972965292|ref|XP_015199913.1|/5.79541e-18/PREDICTED: apelin receptor early endogenous ligand [Lepisosteus oculatus]	P0DMC2/2e-11/ ELA_DANRE Apelin receptor early endogenous ligand OS=Danio rerio GN=apela PE=1 SV=1	NA	NA
S.schlegelii_GLEAN_10011334	5.37565	4.62073	9.22219e-05	0.00176347	gi|657580432|ref|XP_008294180.1|/0/PREDICTED: cyclin-G2-like [Stegastes partitus]	Q16589/1e-113/ CCNG2_HUMAN Cyclin-G2 OS=Homo sapiens GN=CCNG2 PE=2 SV=1	lcf:108897225/0.0/cyclin-G2-like; K10146 cyclin G2	biological_process:GO:0051726//regulation of cell cycle;
S.schlegelii_GLEAN_10013576	5.37835	4.62239	0.000109059	0.00198647	gi|390407618|dbj|BAM21037.1|/1.41446e-101/bactericidal permeability-increasing protein [Oplegnathus fasciatus]	P18428/7e-17/ LBP_HUMAN Lipopolysaccharide-binding protein OS=Homo sapiens GN=LBP PE=1 SV=3	pret:103468035/7e-82/lipopolysaccharide-binding protein; K05399 lipopolysaccharide-binding protein	molecular_function:GO:0008289//lipid binding;
S.schlegelii_GLEAN_10010109	5.37899	4.62265	8.86416e-05	0.00170777	gi|808863610|gb|KKF14910.1|/0/Transcription factor-like 5 protein [Larimichthys crocea]	Q9UL49/1e-21/ TCFL5_HUMAN Transcription factor-like 5 protein OS=Homo sapiens GN=TCFL5 PE=2 SV=2	lcf:108900230/0.0/tcfl5; transcription factor-like 5 protein isoform X1; K09092 transcription factor-like 5	molecular_function:GO:0046983//protein dimerization activity;
S.schlegelii_GLEAN_10009118	5.38013	4.62319	0.000114531	0.00206412	gi|657531681|ref|XP_008302224.1|/0/PREDICTED: atlastin-3 [Stegastes partitus]	Q6DD88/0.0/ ATLA3_HUMAN Atlastin-3 OS=Homo sapiens GN=ATL3 PE=1 SV=1	tru:101073013/0.0/atl3; atlastin GTPase 3; K17339 atlastin [EC:3.6.5.-]	molecular_function:GO:0003924//GTPase activity;GO:0005525//GTP binding;
S.schlegelii_GLEAN_10005470	5.38174	4.62421	0.000123062	0.00221008	gi|432853545|ref|XP_004067760.1|/5.61209e-69/PREDICTED: U6 snRNA-associated Sm-like protein LSm7 [Oryzias latipes] &gt;gi|657594478|ref|XP_008301854.1| PREDICTED: U6 snRNA-associated Sm-like protein LSm7 [Stegastes partitus] &gt;gi|657738499|ref|XP_008329212.1| PREDICTED: U6 snRNA-associated Sm-like protein LSm7 [Cynoglossus semilaevis]	Q9UK45/2e-67/ LSM7_HUMAN U6 snRNA-associated Sm-like protein LSm7 OS=Homo sapiens GN=LSM7 PE=1 SV=1	bpec:110160204/1e-69/lsm7; U6 snRNA-associated Sm-like protein LSm7; K12626 U6 snRNA-associated Sm-like protein LSm7	NA
S.schlegelii_GLEAN_10008956	5.38395	4.62543	9.92599e-05	0.00184744	gi|736301007|ref|XP_010793105.1|/0/PREDICTED: homeobox protein DLX-3 [Notothenia coriiceps]	Q01702/3e-151/ DLX3B_DANRE Homeobox protein Dlx3b OS=Danio rerio GN=dlx3b PE=2 SV=1	ncc:104965792/0.0/dlx3; homeobox protein DLX-3; K09315 homeobox protein DLX3	biological_process:GO:0006355//regulation of transcription, DNA-templated;molecular_function:GO:0003677//DNA binding;GO:0043565//sequence-specific DNA binding;
S.schlegelii_GLEAN_10006244	5.38508	4.62612	9.7906e-05	0.00182889	gi|498982064|ref|XP_004550213.1|/1.19843e-141/PREDICTED: ovarian cancer-associated gene 2 protein [Maylandia zebra]	Q503Y4/4e-114/ OVCA2_DANRE Esterase OVCA2 OS=Danio rerio GN=ovca2 PE=2 SV=1	oaa:100092375/1e-40/diphthamide biosynthesis protein 1-like; K07561 2-(3-amino-3-carboxypropyl)histidine synthase [EC:2.5.1.108]	NA
S.schlegelii_GLEAN_10004200	5.39514	4.63197	0.000101328	0.00187682	gi|808883827|gb|KKF30902.1|/1.00532e-75/Homeobox expressed in ES cells 1 [Larimichthys crocea]	P79775/3e-32/ ANF1_CHICK Homeobox protein ANF-1 OS=Gallus gallus PE=2 SV=2	lcf:108890802/1e-76/homeobox expressed in ES cells 1-like isoform X1; K09354 homeobox protein expressed in ES cells 1	biological_process:GO:0006355//regulation of transcription, DNA-templated;molecular_function:GO:0003677//DNA binding;GO:0043565//sequence-specific DNA binding;
S.schlegelii_GLEAN_10011848	5.39548	4.63193	0.000113794	0.00205566	gi|554823771|ref|XP_005922558.1|/8.22007e-138/PREDICTED: pituitary adenylate cyclase-activating polypeptide isoform X1 [Haplochromis burtoni]	P41585/5e-90/ PACA_ONCNE Glucagon family neuropeptides OS=Oncorhynchus nerka PE=2 SV=1	lcf:108894999/6e-133/adcyap1; pituitary adenylate cyclase-activating polypeptide isoform X1; K05262 adenylate cyclase activating polypeptide	cellular_component:GO:0005576//extracellular region;molecular_function:GO:0005179//hormone activity;
S.schlegelii_GLEAN_10013588	5.39702	4.633	9.33854e-05	0.00177687	gi|657565156|ref|XP_008285860.1|/1.47094e-179/PREDICTED: tafazzin [Stegastes partitus]	Q16635/3e-142/ TAZ_HUMAN Tafazzin OS=Homo sapiens GN=TAZ PE=1 SV=1	lco:104933578/3e-177/taz; tafazzin; K13511 monolysocardiolipin acyltransferase [EC:2.3.1.-]	biological_process:GO:0006644//phospholipid metabolic process;GO:0008152//metabolic process;molecular_function:GO:0016746//transferase activity, transferring acyl groups;
S.schlegelii_GLEAN_10014236	5.39884	4.63397	0.000104995	0.00192847	gi|808876360|gb|KKF24996.1|/2.10791e-53/Protein S100-A13 [Larimichthys crocea]	P79342/4e-22/ S10AD_BOVIN Protein S100-A13 OS=Bos taurus GN=S100A13 PE=3 SV=2	ccar:109096687/3e-16/protein S100-A1-like; K17274 calpactin-1 light chain	molecular_function:GO:0005509//calcium ion binding;
S.schlegelii_GLEAN_10007986	5.39931	4.63433	8.82455e-05	0.00170227	gi|734626125|ref|XP_010741189.1|/2.01348e-154/PREDICTED: CMP-N-acetylneuraminate-beta-galactosamide-alpha-2,3-sialyltransferase 1-like [Larimichthys crocea]	Q02745/1e-89/ SIA4A_PIG CMP-N-acetylneuraminate-beta-galactosamide-alpha-2,3-sialyltransferase 1 OS=Sus scrofa GN=ST3GAL1 PE=1 SV=1	lcf:108900355/2e-165/CMP-N-acetylneuraminate-beta-galactosamide- alpha-2,3-sialyltransferase 1-like isoform X1; K00780 beta-galactoside alpha-2,3-sialyltransferase (sialyltransferase 4A) [EC:2.4.99.4]	biological_process:GO:0006486//protein glycosylation;molecular_function:GO:0008373//sialyltransferase activity;
S.schlegelii_GLEAN_10007580	5.39971	4.63461	0.0001027	0.00189539	gi|808857351|gb|KKF09948.1|/0/3-hydroxyisobutyrate dehydrogenase, mitochondrial [Larimichthys crocea]	P31937/0.0/ 3HIDH_HUMAN 3-hydroxyisobutyrate dehydrogenase, mitochondrial OS=Homo sapiens GN=HIBADH PE=1 SV=2	lco:104927761/0.0/3-hydroxyisobutyrate dehydrogenase, mitochondrial; K00020 3-hydroxyisobutyrate dehydrogenase [EC:1.1.1.31]	biological_process:GO:0055114//oxidation-reduction process;molecular_function:GO:0004616//phosphogluconate dehydrogenase (decarboxylating) activity;GO:0016491//oxidoreductase activity;GO:0051287//NAD binding;
S.schlegelii_GLEAN_10015997	5.40085	4.63523	9.40154e-05	0.00178311	gi|808870554|gb|KKF20380.1|/0/Actin-binding Rho-activating protein [Larimichthys crocea]	Q8BUZ1/3e-83/ ABRA_MOUSE Actin-binding Rho-activating protein OS=Mus musculus GN=Abra PE=1 SV=1	pxy:105391464/1e-14/uncharacterized LOC105391464; K15271 ATP-dependent DNA helicase HFM1/MER3 [EC:3.6.4.12]	biological_process:GO:0035025//positive regulation of Rho protein signal transduction;molecular_function:GO:0003779//actin binding;
S.schlegelii_GLEAN_10011669	5.40892	4.63988	4.89252e-05	0.000983562	gi|961910552|ref|XP_014905610.1|/0/PREDICTED: 60S ribosomal protein L5-like [Poecilia latipinna]	P22451/0.0/ RL5_CHICK 60S ribosomal protein L5 OS=Gallus gallus GN=RPL5 PE=2 SV=2	ola:101160347/0.0/60S ribosomal protein L5-like; K02932 large subunit ribosomal protein L5e	biological_process:GO:0006412//translation;cellular_component:GO:0005622//intracellular;GO:0005840//ribosome;molecular_function:GO:0003735//structural constituent of ribosome;GO:0008097//5S rRNA binding;
S.schlegelii_GLEAN_10018719	5.40925	4.64012	5.38603e-05	0.00105893	gi|808882790|gb|KKF30107.1|/0/Cyclin-A2 [Larimichthys crocea]	P20248/9e-166/ CCNA2_HUMAN Cyclin-A2 OS=Homo sapiens GN=CCNA2 PE=1 SV=2	lcf:108901509/0.0/ccna2; cyclin-A2; K06627 cyclin-A	biological_process:GO:0000079//regulation of cyclin-dependent protein serine/threonine kinase activity;GO:0010389//regulation of G2/M transition of mitotic cell cycle;cellular_component:GO:0005634//nucleus;molecular_function:GO:0019901//protein kinase binding;
S.schlegelii_GLEAN_10013071	5.40968	4.64003	6.24476e-05	0.00121531	gi|808866871|gb|KKF17502.1|/0/Cytochrome P450 2G1 [Larimichthys crocea]	P24461/0.0/ CP2G1_RABIT Cytochrome P450 2G1 OS=Oryctolagus cuniculus GN=CYP2G1 PE=1 SV=1	lco:109141663/0.0/cytochrome P450 2G1-like; K17859 cytochrome P450 family 2 subfamily Y	biological_process:GO:0055114//oxidation-reduction process;molecular_function:GO:0005506//iron ion binding;GO:0016705//oxidoreductase activity, acting on paired donors, with incorporation or reduction of molecular oxygen;GO:0020037//heme binding;
S.schlegelii_GLEAN_10010807	5.41664	4.64449	5.97248e-05	0.00116528	gi|734601973|ref|XP_010727918.1|/0/PREDICTED: interferon alpha/beta receptor 1-like [Larimichthys crocea]	Q61727/4e-07/ I10R1_MOUSE Interleukin-10 receptor subunit alpha OS=Mus musculus GN=Il10ra PE=2 SV=1	lco:104918008/0.0/uncharacterized LOC104918008; K05134 interleukin 10 receptor alpha	molecular_function:GO:0005515//protein binding;
S.schlegelii_GLEAN_10016545	5.41729	4.64473	4.76624e-05	0.00096551	gi|734616187|ref|XP_010735724.1|/2.56348e-131/PREDICTED: B-cell CLL/lymphoma 7 protein family member B [Larimichthys crocea]	A2BIL8/8e-74/ BC7BB_DANRE B-cell CLL/lymphoma 7 protein family member B-B OS=Danio rerio GN=bcl7bb PE=2 SV=1	NA	NA
S.schlegelii_GLEAN_10002942	5.41788	4.64503	5.19719e-05	0.00102839	gi|808883616|gb|KKF30728.1|/1.00889e-180/Adventurous-gliding motility protein Z [Larimichthys crocea]	O94919/2e-15/ ENDD1_HUMAN Endonuclease domain-containing 1 protein OS=Homo sapiens GN=ENDOD1 PE=1 SV=2	nfu:107395309/1e-92/endonuclease domain-containing 1 protein-like; K15049 endonuclease domain-containing 1 protein	molecular_function:GO:0003676//nucleic acid binding;GO:0016787//hydrolase activity;GO:0046872//metal ion binding;
S.schlegelii_GLEAN_10019565	5.41892	4.64567	5.15962e-05	0.00102492	gi|734626734|ref|XP_010741522.1|/0/PREDICTED: bestrophin-1 [Larimichthys crocea]	O76090/0.0/ BEST1_HUMAN Bestrophin-1 OS=Homo sapiens GN=BEST1 PE=1 SV=1	lcf:108887003/0.0/LOW QUALITY PROTEIN: bestrophin-1-like; K13878 bestrophin-1	NA
S.schlegelii_GLEAN_10007974	5.42144	4.64686	7.38324e-05	0.00142963	gi|734649616|ref|XP_010754102.1|/0/PREDICTED: ETS-related transcription factor Elf-3-like isoform X1 [Larimichthys crocea]	Q3UPW2/1e-84/ ELF3_MOUSE ETS-related transcription factor Elf-3 OS=Mus musculus GN=Elf3 PE=1 SV=1	lcf:108886568/0.0/ETS-related transcription factor Elf-3-like isoform X1; K09429 E74-like factor 3	biological_process:GO:0006355//regulation of transcription, DNA-templated;cellular_component:GO:0005634//nucleus;molecular_function:GO:0003700//sequence-specific DNA binding transcription factor activity;GO:0043565//sequence-specific DNA binding;
S.schlegelii_GLEAN_10004980	5.42397	4.64864	6.39448e-05	0.00124131	gi|808881282|gb|KKF28938.1|/1.34581e-132/Transcription factor E2F3 [Larimichthys crocea]	O35261/4e-58/ E2F3_MOUSE Transcription factor E2F3 OS=Mus musculus GN=E2f3 PE=1 SV=2	lcf:108900426/6e-141/transcription factor E2F3-like; K06620 transcription factor E2F3	biological_process:GO:0006355//regulation of transcription, DNA-templated;cellular_component:GO:0005667//transcription factor complex;molecular_function:GO:0003700//sequence-specific DNA binding transcription factor activity;
S.schlegelii_GLEAN_10001483	5.42532	4.6494	5.33575e-05	0.00105174	gi|499049501|ref|XP_004575286.1|/1.46595e-139/PREDICTED: CXXC-type zinc finger protein 5-like [Maylandia zebra]	Q0VFP6/3e-41/ CXXC4_XENTR CXXC-type zinc finger protein 4 OS=Xenopus tropicalis GN=cxxc4 PE=2 SV=2	mze:101475654/3e-140/CXXC-type zinc finger protein 5-like; K03344 Dvl-binding protein IDAX	molecular_function:GO:0003677//DNA binding;GO:0008270//zinc ion binding;
S.schlegelii_GLEAN_10003196	5.42647	4.65004	4.73313e-05	0.000960069	gi|229365948|gb|ACQ57954.1|/2.45484e-70/Replication protein A 14 kDa subunit [Anoplopoma fimbria]	P35244/6e-42/ RFA3_HUMAN Replication protein A 14 kDa subunit OS=Homo sapiens GN=RPA3 PE=1 SV=1	ncc:104959024/2e-70/rpa3; replication protein A 14 kDa subunit; K10740 replication factor A3	biological_process:GO:0006260//DNA replication;GO:0006281//DNA repair;GO:0006310//DNA recombination;cellular_component:GO:0005634//nucleus;molecular_function:GO:0003677//DNA binding;
S.schlegelii_GLEAN_10018332	5.4267	4.65016	5.04541e-05	0.00100744	gi|808874200|gb|KKF23362.1|/0/Keratin, type I cytoskeletal 17 [Larimichthys crocea]	Q6IFU8/5e-147/ K1C17_RAT Keratin, type I cytoskeletal 17 OS=Rattus norvegicus GN=Krt17 PE=1 SV=1	lco:104920375/0.0/keratin, type I cytoskeletal 19-like; K07604 type I keratin, acidic	cellular_component:GO:0005882//intermediate filament;molecular_function:GO:0005198//structural molecule activity;
S.schlegelii_GLEAN_10023396	5.43293	4.65366	6.33165e-05	0.00123066	gi|808886689|gb|KKF33247.1|/0/ELMO domain-containing protein 3, partial [Larimichthys crocea]	Q58DT5/3e-120/ ELMD3_BOVIN ELMO domain-containing protein 3 OS=Bos taurus GN=ELMOD3 PE=2 SV=1	gga:426044/7e-138/ELMOD3, ADRA2L1, ADRA2RL1, ADRARL1, ALPHA2BAR, alpha-2BAR; ELMO domain containing 3; K04139 adrenergic receptor alpha-2B	molecular_function:GO:0005096//GTPase activator activity;
S.schlegelii_GLEAN_10020783	5.43358	4.65419	5.68825e-05	0.00111265	gi|657592580|ref|XP_008300824.1|/0/PREDICTED: mitochondrial ornithine transporter 1-like [Stegastes partitus]	Q9Y619/2e-148/ ORNT1_HUMAN Mitochondrial ornithine transporter 1 OS=Homo sapiens GN=SLC25A15 PE=1 SV=1	lcf:108893758/0.0/mitochondrial ornithine transporter 1-like; K15101 solute carrier family 25 (mitochondrial ornithine transporter) member 2/15	NA
S.schlegelii_GLEAN_10022363	5.43662	4.65609	6.02676e-05	0.00117438	gi|808864902|gb|KKF15911.1|/0/Isopentenyl-diphosphate Delta-isomerase 1 [Larimichthys crocea]	O35586/2e-138/ IDI1_MESAU Isopentenyl-diphosphate Delta-isomerase 1 OS=Mesocricetus auratus GN=IDI1 PE=2 SV=1	lcf:108898279/0.0/idi1; isopentenyl-diphosphate Delta-isomerase 1; K01823 isopentenyl-diphosphate Delta-isomerase [EC:5.3.3.2]	biological_process:GO:0008299//isoprenoid biosynthetic process;molecular_function:GO:0004452//isopentenyl-diphosphate delta-isomerase activity;GO:0016787//hydrolase activity;
S.schlegelii_GLEAN_10015679	5.43836	4.65698	4.94159e-05	0.000990577	gi|736185216|ref|XP_010769873.1|/4.95205e-82/PREDICTED: neuritin [Notothenia coriiceps]	Q8CFV4/2e-29/ NRN1_MOUSE Neuritin OS=Mus musculus GN=Nrn1 PE=1 SV=1	lcm:102355909/4e-21/breast cancer anti-estrogen resistance protein 1-like; K05726 breast cancer anti-estrogen resistance 1	biological_process:GO:0007399//nervous system development;
S.schlegelii_GLEAN_10010808	5.43918	4.6574	5.24945e-05	0.00103739	gi|808885624|gb|KKF32342.1|/0/Transmembrane protease serine 13 [Larimichthys crocea]	Q9BYE2/1e-93/ TMPSD_HUMAN Transmembrane protease serine 13 OS=Homo sapiens GN=TMPRSS13 PE=2 SV=4	lcf:108895271/0.0/transmembrane protease serine 13-like; K09643 transmembrane protease serine 13	biological_process:GO:0006508//proteolysis;cellular_component:GO:0016020//membrane;molecular_function:GO:0004252//serine-type endopeptidase activity;
S.schlegelii_GLEAN_10014903	5.44004	4.65799	5.51563e-05	0.00108164	gi|808882412|gb|KKF29806.1|/0/Autophagy-related protein 13 [Larimichthys crocea]	Q5RE28/0.0/ ATG13_PONAB Autophagy-related protein 13 OS=Pongo abelii GN=ATG13 PE=2 SV=1	lco:104917973/0.0/atg13; autophagy related 13; K08331 autophagy-related protein 13	biological_process:GO:0006914//autophagy;cellular_component:GO:1990316//ATG1/UKL1 kinase complex;
S.schlegelii_GLEAN_10021742	5.44379	4.66016	4.99604e-05	0.00100018	gi|734649187|ref|XP_010753862.1|/0/PREDICTED: 60S ribosomal protein L7a, partial [Larimichthys crocea]	O57592/0.0/ RL7A_TAKRU 60S ribosomal protein L7a OS=Takifugu rubripes GN=rpl7a PE=3 SV=3	lco:104939085/0.0/rpl7a; ribosomal protein L7a; K02936 large subunit ribosomal protein L7Ae	biological_process:GO:0042254//ribosome biogenesis;cellular_component:GO:0030529//ribonucleoprotein complex;
S.schlegelii_GLEAN_10006759	5.44968	4.66355	5.35793e-05	0.00105476	gi|499030418|ref|XP_004565922.1|/6.1739e-137/PREDICTED: charged multivesicular body protein 2a [Maylandia zebra] &gt;gi|548346871|ref|XP_005725837.1| PREDICTED: charged multivesicular body protein 2a [Pundamilia nyererei] &gt;gi|554805688|ref|XP_005913786.1| PREDICTED: charged multivesicular body protein 2a [Haplochromis burtoni] &gt;gi|583996287|ref|XP_006793256.1| PREDICTED: charged multivesicu…	Q7ZW25/3e-133/ CHM2A_DANRE Charged multivesicular body protein 2a OS=Danio rerio GN=chmp2a PE=2 SV=1	mze:101479948/1e-137/chmp2a; charged multivesicular body protein 2A; K12191 charged multivesicular body protein 2A	biological_process:GO:0007034//vacuolar transport;
S.schlegelii_GLEAN_10006492	5.45322	4.66569	5.18219e-05	0.00102674	gi|657541905|ref|XP_008276773.1|/0/PREDICTED: dnaJ homolog subfamily C member 2 [Stegastes partitus]	Q6NWJ4/0.0/ DNJC2_DANRE DnaJ homolog subfamily C member 2 OS=Danio rerio GN=dnajc2 PE=2 SV=1	lco:104923760/0.0/dnajc2, DnaJ; DnaJ heat shock protein family (Hsp40) member C2; K09522 DnaJ homolog subfamily C member 2	NA
S.schlegelii_GLEAN_10019060	5.45908	4.6691	4.93727e-05	0.000990577	gi|808867255|gb|KKF17843.1|/0/Vitamin D 25-hydroxylase [Larimichthys crocea]	Q6VVW9/0.0/ CP2R1_MOUSE Vitamin D 25-hydroxylase OS=Mus musculus GN=Cyp2r1 PE=1 SV=1	lco:104919371/0.0/vitamin D 25-hydroxylase; K07419 vitamin D 25-hydroxylase [EC:1.14.14.24]	biological_process:GO:0055114//oxidation-reduction process;molecular_function:GO:0005506//iron ion binding;GO:0016705//oxidoreductase activity, acting on paired donors, with incorporation or reduction of molecular oxygen;GO:0020037//heme binding;
S.schlegelii_GLEAN_10020173	5.46069	4.67002	5.0997e-05	0.00101433	gi|734596210|ref|XP_010735722.1|/0/PREDICTED: dual specificity protein kinase CLK4-like [Larimichthys crocea] &gt;gi|734596212|ref|XP_010735730.1| PREDICTED: dual specificity protein kinase CLK4-like [Larimichthys crocea]	P22518/1e-158/ CLK1_MOUSE Dual specificity protein kinase CLK1 OS=Mus musculus GN=Clk1 PE=1 SV=2	lco:104924162/0.0/dual specificity protein kinase CLK4-like; K08823 CDC-like kinase [EC:2.7.12.1]	biological_process:GO:0006468//protein phosphorylation;molecular_function:GO:0004672//protein kinase activity;GO:0005524//ATP binding;
S.schlegelii_GLEAN_10022965	5.46184	4.67071	4.7927e-05	0.000967043	gi|657525662|ref|XP_008281296.1|/7.73978e-95/PREDICTED: iron-sulfur cluster assembly 2 homolog, mitochondrial [Stegastes partitus]	Q86U28/3e-50/ ISCA2_HUMAN Iron-sulfur cluster assembly 2 homolog, mitochondrial OS=Homo sapiens GN=ISCA2 PE=1 SV=2	lcf:108892504/3e-95/isca2; iron-sulfur cluster assembly 2 homolog, mitochondrial; K22072 iron-sulfur cluster assembly 2	NA
S.schlegelii_GLEAN_10012119	5.4656	4.67292	4.89379e-05	0.000983562	gi|657597039|ref|XP_008303245.1|/0/PREDICTED: E3 ubiquitin-protein ligase Mdm2 [Stegastes partitus]	O42354/3e-144/ MDM2_DANRE E3 ubiquitin-protein ligase Mdm2 OS=Danio rerio GN=mdm2 PE=2 SV=1	lcf:108895890/0.0/mdm2; E3 ubiquitin-protein ligase Mdm2 isoform X1; K06643 E3 ubiquitin-protein ligase Mdm2 [EC:2.3.2.27]	biological_process:GO:0000122//negative regulation of transcription from RNA polymerase II promoter;GO:0016567//protein ubiquitination;molecular_function:GO:0005515//protein binding;GO:0008270//zinc ion binding;
S.schlegelii_GLEAN_10012420	5.46848	4.67461	4.78227e-05	0.000967043	gi|808884353|gb|KKF31334.1|/4.66983e-80/Huntingtin-interacting protein K [Larimichthys crocea]	Q9CR41/7e-69/ HYPK_MOUSE Huntingtin-interacting protein K OS=Mus musculus GN=Hypk PE=1 SV=2	NA	NA
S.schlegelii_GLEAN_10003373	5.47127	4.67636	7.50867e-05	0.00145209	gi|808873740|gb|KKF22971.1|/9.64347e-143/Zona pellucida sperm-binding protein 2 [Larimichthys crocea]	NA	lav:100663698/2e-24/zona pellucida sperm-binding protein 2-like; K19927 zona pellucida sperm-binding protein 2	NA
S.schlegelii_GLEAN_10023953	5.4735	4.67813	8.3132e-05	0.00160565	gi|657576864|ref|XP_008292233.1|/1.6571e-129/PREDICTED: BAG family molecular chaperone regulator 2 [Stegastes partitus]	Q91YN9/2e-90/ BAG2_MOUSE BAG family molecular chaperone regulator 2 OS=Mus musculus GN=Bag2 PE=1 SV=1	lco:104939886/1e-129/bag2; BCL2 associated athanogene 2; K09556 BCL2-associated athanogene 2	molecular_function:GO:0051087//chaperone binding;
S.schlegelii_GLEAN_10021685	5.47761	4.68002	5.07271e-05	0.00101099	gi|229366714|gb|ACQ58337.1|/5.13261e-94/60S ribosomal protein L27 [Anoplopoma fimbria] &gt;gi|808884753|gb|KKF31656.1| 60S ribosomal protein L27 [Larimichthys crocea]	Q7ZV82/2e-94/ RL27_DANRE 60S ribosomal protein L27 OS=Danio rerio GN=rpl27 PE=2 SV=3	bpec:110164083/1e-94/rpl27; 60S ribosomal protein L27; K02901 large subunit ribosomal protein L27e	biological_process:GO:0006412//translation;cellular_component:GO:0005622//intracellular;GO:0005840//ribosome;molecular_function:GO:0003735//structural constituent of ribosome;
S.schlegelii_GLEAN_10000275	5.48079	4.68187	4.88559e-05	0.000983562	gi|974120144|ref|XP_015259715.1|/0/PREDICTED: gelsolin-like [Cyprinodon variegatus] &gt;gi|974120146|ref|XP_015259716.1| PREDICTED: gelsolin-like [Cyprinodon variegatus]	P06396/0.0/ GELS_HUMAN Gelsolin OS=Homo sapiens GN=GSN PE=1 SV=1	lcf:108894356/0.0/gelsolin-like isoform X1; K05768 gelsolin	biological_process:GO:0045010//actin nucleation;GO:0051014//actin filament severing;GO:0051016//barbed-end actin filament capping;molecular_function:GO:0003779//actin binding;GO:0005509//calcium ion binding;
S.schlegelii_GLEAN_10022295	5.48836	4.68646	5.49388e-05	0.00107875	gi|808878546|gb|KKF26773.1|/1.64309e-72/Dual specificity protein phosphatase 22-B [Larimichthys crocea]	Q566R7/4e-54/ DS22B_DANRE Dual specificity protein phosphatase 22-B OS=Danio rerio GN=dusp22b PE=2 SV=2	lco:104931523/3e-73/dusp22; dual specificity phosphatase 22; K14165 atypical dual specificity phosphatase [EC:3.1.3.16 3.1.3.48]	biological_process:GO:0006470//protein dephosphorylation;GO:0016311//dephosphorylation;molecular_function:GO:0008138//protein tyrosine/serine/threonine phosphatase activity;GO:0016791//phosphatase activity;
S.schlegelii_GLEAN_10020677	5.49631	4.69107	2.84053e-05	0.000592614	gi|808861446|gb|KKF13274.1|/9.40831e-140/Claudin-7-A [Larimichthys crocea]	Q6DHP1/2e-115/ CLD7A_DANRE Claudin-7-A OS=Danio rerio GN=cldn7a PE=2 SV=1	lco:104920020/2e-140/claudin-7-B; K06087 claudin	cellular_component:GO:0005923//tight junction;GO:0016021//integral component of membrane;molecular_function:GO:0005198//structural molecule activity;
S.schlegelii_GLEAN_10013787	5.49703	4.69152	3.00052e-05	0.000621769	gi|542242957|ref|XP_003453875.2|/0/PREDICTED: DNA polymerase lambda [Oreochromis niloticus]	Q5RKI3/0.0/ DPOLL_RAT DNA polymerase lambda OS=Rattus norvegicus GN=Poll PE=2 SV=1	lcf:108875602/0.0/poll; DNA polymerase lambda; K03512 DNA polymerase lambda [EC:2.7.7.7 4.2.99.-]	biological_process:GO:0006281//DNA repair;cellular_component:GO:0005634//nucleus;molecular_function:GO:0003677//DNA binding;GO:0003887//DNA-directed DNA polymerase activity;GO:0016779//nucleotidyltransferase activity;GO:0034061//DNA polymerase activity;
S.schlegelii_GLEAN_10014620	5.49908	4.69275	2.74923e-05	0.000575914	gi|734627798|ref|XP_010742101.1|/1.43995e-94/PREDICTED: tuberoinfundibular peptide of 39 residues [Larimichthys crocea]	P0C172/1e-12/ TIP39_RAT Tuberoinfundibular peptide of 39 residues OS=Rattus norvegicus GN=Pth2 PE=2 SV=1	NA	biological_process:GO:0007218//neuropeptide signaling pathway;cellular_component:GO:0005576//extracellular region;
S.schlegelii_GLEAN_10003974	5.50682	4.6973	2.61269e-05	0.000552587	gi|334306121|gb|AEG76955.1|/7.07136e-86/relaxin 3a precursor [Acanthopagrus schlegelii] &gt;gi|334306127|gb|AEG76958.1| relaxin 3a [Acanthopagrus schlegelii]	Q5CZK2/3e-23/ REL3_PANTR Relaxin-3 OS=Pan troglodytes GN=RLN3 PE=3 SV=1	lcf:108879322/4e-89/relaxin-3-like isoform X1; K22000 relaxin 3	cellular_component:GO:0005576//extracellular region;molecular_function:GO:0005179//hormone activity;
S.schlegelii_GLEAN_10015731	5.5069	4.69746	3.84135e-05	0.000784361	gi|736261414|ref|XP_010789847.1|/0/PREDICTED: nuclear receptor subfamily 1 group D member 1-like [Notothenia coriiceps]	Q14995/9e-152/ NR1D2_HUMAN Nuclear receptor subfamily 1 group D member 2 OS=Homo sapiens GN=NR1D2 PE=1 SV=3	ncc:104963001/0.0/nuclear receptor subfamily 1 group D member 1-like; K03728 nuclear receptor subfamily 1 group D member 1	biological_process:GO:0006355//regulation of transcription, DNA-templated;GO:0043401//steroid hormone mediated signaling pathway;cellular_component:GO:0005634//nucleus;molecular_function:GO:0003677//DNA binding;GO:0003700//sequence-specific DNA binding transcription factor activity;GO:0003707//steroid hormone receptor activity;GO:0008270//zinc ion binding;GO:0043565//sequence-specific DNA binding;
S.schlegelii_GLEAN_10006882	5.50707	4.69743	2.58301e-05	0.000547872	gi|808860003|gb|KKF12070.1|/2.04815e-147/Transmembrane emp24 domain-containing protein 6 [Larimichthys crocea]	Q8WW62/1e-82/ TMED6_HUMAN Transmembrane emp24 domain-containing protein 6 OS=Homo sapiens GN=TMED6 PE=2 SV=2	lco:109143165/4e-148/transmembrane emp24 domain-containing protein 6-like; K20351 p24 family protein gamma-5	biological_process:GO:0006810//transport;cellular_component:GO:0016021//integral component of membrane;
S.schlegelii_GLEAN_10018089	5.51451	4.7019	2.67557e-05	0.000563558	gi|82468419|gb|ABB76649.1|/2.49387e-145/deleted in azoospermia-like protein [Lates calcarifer]	Q9YGW7/3e-106/ DAZL_DANRE Deleted in azoospermia-like OS=Danio rerio GN=dazl PE=1 SV=1	sgh:107598320/2e-10/ras GTPase-activating protein-binding protein 1-like; K17265 Ras GTPase-activating protein-binding protein 1 [EC:3.6.4.12 3.6.4.13]	molecular_function:GO:0003676//nucleic acid binding;
S.schlegelii_GLEAN_10000782	5.51452	4.70188	2.4985e-05	0.000536566	gi|908538380|ref|XP_013131570.1|/0/PREDICTED: E3 ubiquitin-protein ligase TRIM21-like [Oreochromis niloticus]	Q02084/2e-85/ A33_PLEWA Zinc-binding protein A33 OS=Pleurodeles waltl PE=1 SV=2	mze:101469958/0.0/E3 ubiquitin-protein ligase TRIM21-like; K12015 tripartite motif-containing protein 39 [EC:2.3.2.27]	cellular_component:GO:0005622//intracellular;molecular_function:GO:0005515//protein binding;GO:0008270//zinc ion binding;GO:0046872//metal ion binding;
S.schlegelii_GLEAN_10016041	5.52176	4.7062	2.46515e-05	0.000530146	gi|808876394|gb|KKF25030.1|/0/Eomesodermin [Larimichthys crocea]	P79944/0.0/ EOMES_XENLA Eomesodermin OS=Xenopus laevis GN=eomes PE=2 SV=1	lcf:108889084/0.0/eomesodermin-like isoform X1; K10173 eomesodermin protein	biological_process:GO:0006355//regulation of transcription, DNA-templated;cellular_component:GO:0005634//nucleus;molecular_function:GO:0003700//sequence-specific DNA binding transcription factor activity;
S.schlegelii_GLEAN_10000117	5.52265	4.70673	2.57178e-05	0.000547872	gi|499037668|ref|XP_004569481.1|/0/PREDICTED: tripartite motif-containing protein 16-like [Maylandia zebra]	Q99PP9/5e-64/ TRI16_MOUSE Tripartite motif-containing protein 16 OS=Mus musculus GN=Trim16 PE=1 SV=2	mze:101468976/0.0/tripartite motif-containing protein 16-like; K12006 tripartite motif-containing protein 16	cellular_component:GO:0005622//intracellular;molecular_function:GO:0005515//protein binding;GO:0008270//zinc ion binding;
S.schlegelii_GLEAN_10013289	5.52351	4.70723	2.57727e-05	0.000547872	gi|736235822|ref|XP_010783605.1|/0/PREDICTED: vacuolar protein sorting-associated protein 4B isoform X1 [Notothenia coriiceps]	Q0VD48/0.0/ VPS4B_BOVIN Vacuolar protein sorting-associated protein 4B OS=Bos taurus GN=VPS4B PE=2 SV=1	ncc:104957654/0.0/vps4b; vacuolar protein sorting-associated protein 4B isoform X1; K12196 vacuolar protein-sorting-associated protein 4	molecular_function:GO:0005524//ATP binding;
S.schlegelii_GLEAN_10007238	5.52413	4.70771	4.594e-05	0.000933079	gi|736172429|ref|XP_010766239.1|/1.23839e-131/PREDICTED: tetratricopeptide repeat protein 9C [Notothenia coriiceps]	Q9BGT1/7e-57/ TTC9C_MACFA Tetratricopeptide repeat protein 9C OS=Macaca fascicularis GN=TTC9C PE=2 SV=1	nvl:108556545/3e-13/70 kDa peptidyl-prolyl isomerase-like; K20097 FK506-binding protein-like	molecular_function:GO:0005515//protein binding;
S.schlegelii_GLEAN_10012990	5.52426	4.70785	3.20264e-05	0.000658321	gi|734599558|ref|XP_010753261.1|/4.55501e-36/PREDICTED: uncharacterized protein LOC104938556 [Larimichthys crocea]	NA	lcf:108889522/1e-21/prostate stem cell antigen-like; K06846 lymphocyte antigen 6 complex locus protein D/E/G6/H	NA
S.schlegelii_GLEAN_10018974	5.52788	4.70983	2.68679e-05	0.000565147	gi|808858547|gb|KKF10909.1|/0/Transmembrane and coiled-coil domain-containing protein 3 [Larimichthys crocea]	Q8BH01/0.0/ TMCO3_MOUSE Transmembrane and coiled-coil domain-containing protein 3 OS=Mus musculus GN=Tmco3 PE=2 SV=1	NA	biological_process:GO:0006812//cation transport;GO:0055085//transmembrane transport;cellular_component:GO:0016021//integral component of membrane;molecular_function:GO:0015299//solute:proton antiporter activity;
S.schlegelii_GLEAN_10005859	5.52827	4.71008	2.70707e-05	0.000568632	gi|808866185|gb|KKF16941.1|/0/Myb-related protein A [Larimichthys crocea]	P52550/0.0/ MYBA_CHICK Myb-related protein A OS=Gallus gallus GN=MYBL1 PE=2 SV=1	lco:104921592/0.0/mybl1; MYB proto-oncogene like 1; K09421 myb-related protein A	biological_process:GO:0006355//regulation of transcription, DNA-templated;
S.schlegelii_GLEAN_10009104	5.52954	4.71086	2.58049e-05	0.000547872	gi|657531642|ref|XP_008302060.1|/0/PREDICTED: ligand of Numb protein X 2-like [Stegastes partitus]	Q8N448/0.0/ LNX2_HUMAN Ligand of Numb protein X 2 OS=Homo sapiens GN=LNX2 PE=1 SV=1	lco:104931567/0.0/ligand of Numb protein X 2-like; K10692 ligand of Numb protein X 1/2 [EC:2.3.2.27]	molecular_function:GO:0005515//protein binding;GO:0008270//zinc ion binding;GO:0046872//metal ion binding;
S.schlegelii_GLEAN_10023402	5.53289	4.71286	2.58061e-05	0.000547872	gi|736164827|ref|XP_010764213.1|/0/PREDICTED: uncharacterized protein C5orf34 homolog isoform X1 [Notothenia coriiceps]	A4FUB0/4e-69/ CE034_BOVIN Uncharacterized protein C5orf34 homolog OS=Bos taurus PE=2 SV=1	sgh:107567649/4e-26/uncharacterized protein LOC107567649; K14322 polyadenylate-binding protein-interacting protein 1	NA
S.schlegelii_GLEAN_10009869	5.53643	4.71478	3.13125e-05	0.000645373	gi|736215395|ref|XP_010778417.1|/0/PREDICTED: probable ATP-dependent RNA helicase DDX59 [Notothenia coriiceps]	Q5T1V6/0.0/ DDX59_HUMAN Probable ATP-dependent RNA helicase DDX59 OS=Homo sapiens GN=DDX59 PE=1 SV=1	lcf:108881210/0.0/ddx59; probable ATP-dependent RNA helicase DDX59; K19466 ATP-dependent RNA helicase DDX59 [EC:3.6.4.13]	molecular_function:GO:0003676//nucleic acid binding;GO:0005524//ATP binding;
S.schlegelii_GLEAN_10004152	5.53662	4.71509	2.75498e-05	0.000576332	gi|736232875|ref|XP_010782869.1|/0/PREDICTED: NADPH oxidase 1 [Notothenia coriiceps]	Q61093/0.0/ CY24B_MOUSE Cytochrome b-245 heavy chain OS=Mus musculus GN=Cybb PE=1 SV=1	ncc:104956977/0.0/nox1; NADPH oxidase 1; K08008 NADPH oxidase 1	biological_process:GO:0042554//superoxide anion generation;GO:0055114//oxidation-reduction process;cellular_component:GO:0016020//membrane;molecular_function:GO:0016175//superoxide-generating NADPH oxidase activity;GO:0016491//oxidoreductase activity;
S.schlegelii_GLEAN_10021381	5.5389	4.71651	2.85254e-05	0.000594312	gi|736246418|ref|XP_010786620.1|/0/PREDICTED: E3 ubiquitin-protein ligase TRIM39-like [Notothenia coriiceps]	Q9HCM9/5e-63/ TRI39_HUMAN E3 ubiquitin-protein ligase TRIM39 OS=Homo sapiens GN=TRIM39 PE=1 SV=2	ncc:104960320/0.0/E3 ubiquitin-protein ligase TRIM39-like; K12015 tripartite motif-containing protein 39 [EC:2.3.2.27]	molecular_function:GO:0005515//protein binding;GO:0008270//zinc ion binding;
S.schlegelii_GLEAN_10017614	5.54157	4.71806	2.54803e-05	0.000545225	gi|657580002|ref|XP_008293945.1|/0/PREDICTED: uncharacterized protein KIAA2013 homolog [Stegastes partitus]	A4IH88/0.0/ K2013_XENTR Uncharacterized protein KIAA2013 homolog OS=Xenopus tropicalis PE=2 SV=1	tng:GSTEN00008052G001/2e-10/unnamed protein product; K19721 collagen, type V/XI/XXIV/XXVII, alpha	NA
S.schlegelii_GLEAN_10008570	5.54337	4.71905	3.11168e-05	0.000642203	gi|808879608|gb|KKF27611.1|/3.34622e-74/LSM domain-containing protein 1 [Larimichthys crocea]	A2BIG9/3e-52/ LSMD1_DANRE N-alpha-acetyltransferase 38, NatC auxiliary subunit OS=Danio rerio GN=naa38 PE=3 SV=1	lco:104927617/6e-75/naa38; N(alpha)-acetyltransferase 38, NatC auxiliary subunit; K20824 N-alpha-acetyltransferase 38, NatC auxiliary subunit	NA
S.schlegelii_GLEAN_10009434	5.54679	4.72099	3.27204e-05	0.000670789	gi|657532115|ref|XP_008303749.1|/3.39169e-105/PREDICTED: THO complex subunit 4 [Stegastes partitus]	B5FXN8/4e-99/ THOC4_TAEGU THO complex subunit 4 OS=Taeniopygia guttata GN=ALYREF PE=2 SV=1	sfm:108936956/1e-111/LOW QUALITY PROTEIN: THO complex subunit 4-like; K12881 THO complex subunit 4	molecular_function:GO:0003676//nucleic acid binding;
S.schlegelii_GLEAN_10015713	5.54822	4.72207	2.66332e-05	0.000561748	gi|736153295|ref|XP_010780707.1|/0/PREDICTED: matrix metalloproteinase-19 [Notothenia coriiceps]	Q9JHI0/1e-178/ MMP19_MOUSE Matrix metalloproteinase-19 OS=Mus musculus GN=Mmp19 PE=2 SV=1	lcf:108898953/0.0/matrix metalloproteinase-19-like; K07998 matrix metalloproteinase-19 (RASI) [EC:3.4.24.-]	biological_process:GO:0006508//proteolysis;cellular_component:GO:0031012//extracellular matrix;molecular_function:GO:0004222//metalloendopeptidase activity;GO:0008237//metallopeptidase activity;GO:0008270//zinc ion binding;
S.schlegelii_GLEAN_10016890	5.54833	4.72225	3.03869e-05	0.000628829	gi|966704260|gb|KTG36501.1|/2.28001e-36/hypothetical protein cypCar_00013907 [Cyprinus carpio]	P00126/4e-24/ QCR6_BOVIN Cytochrome b-c1 complex subunit 6, mitochondrial OS=Bos taurus GN=UQCRH PE=1 SV=2	ccar:109060060/8e-37/cytochrome b-c1 complex subunit 6, mitochondrial-like; K00416 ubiquinol-cytochrome c reductase subunit 6	biological_process:GO:0006122//mitochondrial electron transport, ubiquinol to cytochrome c;molecular_function:GO:0008121//ubiquinol-cytochrome-c reductase activity;
S.schlegelii_GLEAN_10017650	5.55091	4.72344	3.43262e-05	0.000701836	gi|734637730|ref|XP_010747566.1|/0/PREDICTED: alpha-1,3-mannosyl-glycoprotein 4-beta-N-acetylglucosaminyltransferase C-like [Larimichthys crocea]	Q5U3T0/2e-140/ MGT4C_DANRE Alpha-1,3-mannosyl-glycoprotein 4-beta-N-acetylglucosaminyltransferase C OS=Danio rerio GN=mgat4c PE=2 SV=1	lcf:108899620/0.0/alpha-1,3-mannosyl-glycoprotein 4-beta-N-acetylglucosaminyltransferase C-like isoform X1; K13748 alpha-1,3-mannosylglycoprotein beta-1,4-N-acetylglucosaminyltransferase C [EC:2.4.1.201 2.4.1.145]	biological_process:GO:0005975//carbohydrate metabolic process;cellular_component:GO:0016020//membrane;molecular_function:GO:0016758//transferase activity, transferring hexosyl groups;
S.schlegelii_GLEAN_10023265	5.55355	4.72537	5.33421e-05	0.00105174	gi|808863750|gb|KKF15038.1|/0/WD repeat-containing protein 54 [Larimichthys crocea]	Q9R0D8/2e-105/ WDR54_MOUSE WD repeat-containing protein 54 OS=Mus musculus GN=Wdr54 PE=1 SV=1	NA	NA
S.schlegelii_GLEAN_10006410	5.55371	4.72537	2.58326e-05	0.000547872	gi|734628540|ref|XP_010742512.1|/1.29865e-138/PREDICTED: GRAM domain-containing protein 3-like [Larimichthys crocea]	Q5FVG8/4e-36/ GRM2B_RAT GRAM domain-containing protein 2B OS=Rattus norvegicus GN=Gramd2b PE=1 SV=1	epa:110240202/1e-08/TBC1 domain family member 9-like; K19951 TBC1 domain family member 8/9	NA
S.schlegelii_GLEAN_10012667	5.55502	4.72618	2.73585e-05	0.000573893	gi|736229602|ref|XP_010782145.1|/3.31337e-169/PREDICTED: REM2- and Rab-like small GTPase 1 [Notothenia coriiceps]	Q66JN8/1e-133/ RSG1_DANRE REM2- and Rab-like small GTPase 1 OS=Danio rerio GN=rsg1 PE=2 SV=1	crg:105339891/7e-12/ras-related protein Rab-1A-like; K07874 Ras-related protein Rab-1A	biological_process:GO:0007264//small GTPase mediated signal transduction;GO:0015031//protein transport;molecular_function:GO:0005525//GTP binding;
S.schlegelii_GLEAN_10014049	5.55886	4.72848	2.62789e-05	0.000555037	gi|808885774|gb|KKF32475.1|/0/Nuclear factor interleukin-3-regulated protein [Larimichthys crocea]	Q68EL6/7e-29/ NFIL3_DANRE Nuclear factor interleukin-3-regulated protein OS=Danio rerio GN=nfil3 PE=2 SV=1	lco:104930245/0.0/nuclear factor interleukin-3-regulated protein; K09059 nuclear factor, interleukin 3 regulated	biological_process:GO:0006355//regulation of transcription, DNA-templated;molecular_function:GO:0003700//sequence-specific DNA binding transcription factor activity;GO:0043565//sequence-specific DNA binding;
S.schlegelii_GLEAN_10012933	5.56006	4.72939	3.405e-05	0.000697117	gi|542209012|ref|XP_005477650.1|/0/PREDICTED: uncharacterized protein C2orf71 homolog [Oreochromis niloticus]	A6NGG8/4e-34/ CB071_HUMAN Uncharacterized protein C2orf71 OS=Homo sapiens GN=C2orf71 PE=1 SV=1	tng:GSTEN00035528G001/2e-10/unnamed protein product; K04622 G protein-coupled receptor family C group 6 member A	NA
S.schlegelii_GLEAN_10022088	5.56203	4.73	4.24949e-05	0.00086425	gi|348522002|ref|XP_003448515.1|/9.24387e-129/PREDICTED: gamma-crystallin N-A-like [Oreochromis niloticus] &gt;gi|499002879|ref|XP_004555339.1| PREDICTED: gamma-crystallin N-A-like [Maylandia zebra] &gt;gi|548353770|ref|XP_005729128.1| PREDICTED: gamma-crystallin N-A-like [Pundamilia nyererei] &gt;gi|554828168|ref|XP_005924686.1| PREDICTED: gamma-crystallin N-A-like [Haplochromis burtoni]	Q5XTN8/1e-115/ CRGNA_DANRE Gamma-crystallin N-A OS=Danio rerio GN=crygna PE=2 SV=1	bacu:103015945/1e-39/TBCCD1; TBCC domain containing 1; K16810 TBCC domain-containing protein 1	NA
S.schlegelii_GLEAN_10014177	5.56724	4.73345	3.08262e-05	0.00063706	gi|348537537|ref|XP_003456250.1|/6.8419e-150/PREDICTED: insulin-induced gene 2 protein [Oreochromis niloticus]	Q80UA9/9e-127/ INSI2_RAT Insulin-induced gene 2 protein OS=Rattus norvegicus GN=Insig2 PE=2 SV=1	NA	NA
S.schlegelii_GLEAN_10020156	5.57782	4.73995	1.39563e-05	0.00031239	gi|657596324|ref|XP_008302859.1|/2.85983e-155/PREDICTED: transmembrane protein 136-like [Stegastes partitus]	Q1LXV8/1e-102/ TM136_DANRE Transmembrane protein 136 OS=Danio rerio GN=tmem136 PE=2 SV=1	NA	cellular_component:GO:0016021//integral component of membrane;
S.schlegelii_GLEAN_10022879	5.57822	4.73995	2.02993e-05	0.000439626	gi|736217779|ref|XP_010779029.1|/0/PREDICTED: abscission/NoCut checkpoint regulator [Notothenia coriiceps]	Q9DAZ9/6e-147/ ANCHR_MOUSE Abscission/NoCut checkpoint regulator OS=Mus musculus GN=Zfyve19 PE=1 SV=2	hst:105187269/2e-06/uncharacterized LOC105187269; K04679 MAD, mothers against decapentaplegic interacting protein	molecular_function:GO:0046872//metal ion binding;
S.schlegelii_GLEAN_10009364	5.57849	4.74013	1.70549e-05	0.000372515	gi|657546165|ref|XP_008278309.1|/9.71769e-156/PREDICTED: putative transcription factor ovo-like protein 3 [Stegastes partitus]	Q8CIV7/6e-62/ OVOL2_MOUSE Transcription factor Ovo-like 2 OS=Mus musculus GN=Ovol2 PE=2 SV=2	csem:103395033/2e-136/transcription factor Ovo-like 2; K09216 ovo	biological_process:GO:0006351//transcription, DNA-templated;GO:0006366//transcription from RNA polymerase II promoter;cellular_component:GO:0005634//nucleus;molecular_function:GO:0000981//sequence-specific DNA binding RNA polymerase II transcription factor activity;GO:0003700//sequence-specific DNA binding transcription factor activity;GO:0046872//metal ion binding;
S.schlegelii_GLEAN_10023085	5.57908	4.74165	4.16452e-05	0.000848093	gi|808858107|gb|KKF10560.1|/0/Four and a half LIM domains protein 2 [Larimichthys crocea]	Q14192/2e-153/ FHL2_HUMAN Four and a half LIM domains protein 2 OS=Homo sapiens GN=FHL2 PE=1 SV=3	lcf:108874966/0.0/four and a half LIM domains protein 2-like; K14380 four and a half LIM domains protein 2	molecular_function:GO:0008270//zinc ion binding;
S.schlegelii_GLEAN_10023222	5.58161	4.74224	1.32685e-05	0.000297428	gi|35181688|gb|AAN77875.1|/7.21502e-110/growth hormone secretagogue receptor 1a [Acanthopagrus schlegelii]	Q95254/3e-62/ GHSR_PIG Growth hormone secretagogue receptor type 1 OS=Sus scrofa GN=GHSR PE=2 SV=1	lco:104920044/4e-110/ghsr; growth hormone secretagogue receptor; K04284 growth hormone secretagogue receptor	biological_process:GO:0007186//G-protein coupled receptor signaling pathway;cellular_component:GO:0016021//integral component of membrane;molecular_function:GO:0004930//G-protein coupled receptor activity;GO:0016520//growth hormone-releasing hormone receptor activity;
S.schlegelii_GLEAN_10014389	5.5817	4.74197	1.86753e-05	0.000405601	gi|657805418|ref|XP_008329854.1|/1.95312e-141/PREDICTED: ras-related protein Rab-25-like [Cynoglossus semilaevis]	Q9WTL2/1e-96/ RAB25_MOUSE Ras-related protein Rab-25 OS=Mus musculus GN=Rab25 PE=1 SV=2	csem:103394362/4e-142/ras-related protein Rab-25-like; K07906 Ras-related protein Rab-25	biological_process:GO:0006886//intracellular protein transport;GO:0006913//nucleocytoplasmic transport;GO:0007165//signal transduction;GO:0007264//small GTPase mediated signal transduction;GO:0015031//protein transport;cellular_component:GO:0005622//intracellular;GO:0016020//membrane;molecular_function:GO:0003924//GTPase activity;GO:0005525//GTP binding;
S.schlegelii_GLEAN_10000935	5.58402	4.74376	1.4845e-05	0.000328925	gi|542251567|ref|XP_005461850.1|/5.91834e-179/PREDICTED: protein FAM53C-like [Oreochromis niloticus] &gt;gi|542251569|ref|XP_005461851.1| PREDICTED: protein FAM53C-like [Oreochromis niloticus] &gt;gi|542251573|ref|XP_005461853.1| PREDICTED: protein FAM53C-like [Oreochromis niloticus]	Q8BXQ8/3e-25/ FA53C_MOUSE Protein FAM53C OS=Mus musculus GN=Fam53c PE=1 SV=1	NA	NA
S.schlegelii_GLEAN_10007586	5.58719	4.74564	1.39829e-05	0.000312528	gi|808857344|gb|KKF09941.1|/6.52708e-116/Chromobox protein, partial [Larimichthys crocea]	P23198/4e-53/ CBX3_MOUSE Chromobox protein homolog 3 OS=Mus musculus GN=Cbx3 PE=1 SV=2	lcf:108891497/4e-118/chromobox protein homolog 3-like; K11586 chromobox protein 3	cellular_component:GO:0005634//nucleus;
S.schlegelii_GLEAN_10006365	5.58747	4.74586	1.47053e-05	0.0003263	gi|299507654|gb|ADJ21806.1|/1.86858e-149/gamma-interferon-inducible lysosomal thiol reductase [Oplegnathus fasciatus]	A6QPN6/2e-60/ GILT_BOVIN Gamma-interferon-inducible lysosomal thiol reductase OS=Bos taurus GN=IFI30 PE=2 SV=1	lcf:108883664/3e-141/ifi30; gamma-interferon-inducible lysosomal thiol reductase isoform X1; K08059 interferon, gamma-inducible protein 30	NA
S.schlegelii_GLEAN_10011435	5.59162	4.74832	1.31171e-05	0.000294464	gi|317419147|emb|CBN81184.1|/0/Transcription factor Sox-8 [Dicentrarchus labrax]	P57074/4e-132/ SOX8_CHICK Transcription factor SOX-8 OS=Gallus gallus GN=SOX8 PE=2 SV=1	lco:104929246/0.0/transcription factor Sox-8; K09270 transcription factor SOX7/8/10/18 (SOX group E/F)	biological_process:GO:0006355//regulation of transcription, DNA-templated;molecular_function:GO:0000981//sequence-specific DNA binding RNA polymerase II transcription factor activity;
S.schlegelii_GLEAN_10012196	5.59324	4.74918	1.68539e-05	0.000368649	gi|736300340|ref|XP_010792876.1|/0/PREDICTED: la-related protein 7 [Notothenia coriiceps] &gt;gi|736300344|ref|XP_010792877.1| PREDICTED: la-related protein 7 [Notothenia coriiceps]	Q7ZWE3/0.0/ LARP7_DANRE La-related protein 7 OS=Danio rerio GN=larp7 PE=2 SV=1	ncc:104965593/0.0/larp7; la-related protein 7; K15191 La-related protein 7	biological_process:GO:0006396//RNA processing;cellular_component:GO:0005634//nucleus;GO:0030529//ribonucleoprotein complex;molecular_function:GO:0003676//nucleic acid binding;GO:0003723//RNA binding;
S.schlegelii_GLEAN_10003829	5.59411	4.74934	2.0822e-05	0.000450313	gi|317419141|emb|CBN81178.1|/4.06388e-100/Pol polyprotein [Dicentrarchus labrax]	Q86TG7/1e-41/ PEG10_HUMAN Retrotransposon-derived protein PEG10 OS=Homo sapiens GN=PEG10 PE=1 SV=2	sgh:107556838/1e-34/tripartite motif-containing protein 35-like; K12012 tripartite motif-containing protein 35	NA
S.schlegelii_GLEAN_10022878	5.59435	4.75008	1.5558e-05	0.000342744	gi|583981507|ref|XP_006786056.1|/0/PREDICTED: mitotic checkpoint serine/threonine-protein kinase BUB1 beta-like isoform X2 [Neolamprologus brichardi]	Q9Z1S0/2e-120/ BUB1B_MOUSE Mitotic checkpoint serine/threonine-protein kinase BUB1 beta OS=Mus musculus GN=Bub1b PE=1 SV=2	mze:101474622/0.0/bub1b; BUB1 mitotic checkpoint serine/threonine kinase B; K06637 mitotic checkpoint serine/threonine-protein kinase BUB1 beta [EC:2.7.11.1]	biological_process:GO:0007094//mitotic spindle assembly checkpoint;
S.schlegelii_GLEAN_10002227	5.60762	4.75807	1.54589e-05	0.00034105	gi|255672669|gb|ACU27024.1|/6.73092e-139/novel immune-type receptor 24 [Dicentrarchus labrax]	P01696/2e-07/ KV15_RABIT Ig kappa chain V region K29-213 OS=Oryctolagus cuniculus PE=1 SV=1	lcf:108881991/2e-127/uncharacterized protein LOC108881991 isoform X1; K16826 signal-regulatory protein beta 2	molecular_function:GO:0005515//protein binding;
S.schlegelii_GLEAN_10003756	5.60837	4.75876	2.39187e-05	0.000515107	gi|354832335|gb|AER42657.1|/0/keratin type II E3 [Epinephelus coioides]	P18520/0.0/ ION3_CARAU Intermediate filament protein ON3 OS=Carassius auratus PE=2 SV=1	lcf:108884038/0.0/keratin, type II cytoskeletal 8-like; K07605 type II keratin, basic	cellular_component:GO:0005882//intermediate filament;GO:0045095//keratin filament;molecular_function:GO:0005198//structural molecule activity;
S.schlegelii_GLEAN_10000593	5.61775	4.76441	1.78173e-05	0.000388064	gi|808874675|gb|KKF23722.1|/2.63899e-122/Cysteine string protein [Larimichthys crocea]	P56101/1e-61/ DNJC5_TETCF DnaJ homolog subfamily C member 5 OS=Tetronarce californica GN=dnajc5 PE=1 SV=1	lco:104928829/5e-123/dnajc5g; DnaJ heat shock protein family (Hsp40) member C5 gamma; K09525 DnaJ homolog subfamily C member 5	NA
S.schlegelii_GLEAN_10011643	5.61873	4.76486	1.62609e-05	0.000356186	gi|657522603|ref|XP_008280381.1|/1.10216e-131/PREDICTED: claudin-1-like [Stegastes partitus]	P56745/1e-83/ CLD1_RAT Claudin-1 OS=Rattus norvegicus GN=Cldn1 PE=1 SV=2	lco:104920908/9e-130/claudin-1; K06087 claudin	cellular_component:GO:0005923//tight junction;GO:0016021//integral component of membrane;molecular_function:GO:0005198//structural molecule activity;
S.schlegelii_GLEAN_10009500	5.62033	4.76618	2.19139e-05	0.00047326	gi|657789287|ref|XP_008321409.1|/0/PREDICTED: zinc finger and BTB domain-containing protein 7B isoform X1 [Cynoglossus semilaevis]	O15156/2e-70/ ZBT7B_HUMAN Zinc finger and BTB domain-containing protein 7B OS=Homo sapiens GN=ZBTB7B PE=1 SV=2	lcf:108885895/0.0/zinc finger and BTB domain-containing protein 7B-like isoform X1; K10494 zinc finger and BTB domain-containing protein 7	molecular_function:GO:0005515//protein binding;GO:0046872//metal ion binding;
S.schlegelii_GLEAN_10013442	5.6284	4.77051	2.53711e-05	0.000544097	gi|348501372|ref|XP_003438244.1|/1.43702e-167/PREDICTED: ubiquitin-conjugating enzyme E2 R1-like [Oreochromis niloticus] &gt;gi|498943481|ref|XP_004542543.1| PREDICTED: ubiquitin-conjugating enzyme E2 R1-like [Maylandia zebra] &gt;gi|498943487|ref|XP_004542544.1| PREDICTED: ubiquitin-conjugating enzyme E2 R1-like [Maylandia zebra] &gt;gi|554819693|ref|XP_005920591.1| PREDICTED: ubiquitin-conjugat…	P49427/4e-146/ UB2R1_HUMAN Ubiquitin-conjugating enzyme E2 R1 OS=Homo sapiens GN=CDC34 PE=1 SV=2	mze:101480834/3e-168/ubiquitin-conjugating enzyme E2 R1-like; K02207 ubiquitin-conjugating enzyme E2 R [EC:2.3.2.23]	NA
S.schlegelii_GLEAN_10003772	5.63287	4.77363	1.43925e-05	0.000320285	gi|499051190|ref|XP_004576108.1|/2.82199e-86/PREDICTED: microsomal glutathione S-transferase 1 [Maylandia zebra] &gt;gi|499051192|ref|XP_004576109.1| PREDICTED: microsomal glutathione S-transferase 1 [Maylandia zebra]	P10620/8e-59/ MGST1_HUMAN Microsomal glutathione S-transferase 1 OS=Homo sapiens GN=MGST1 PE=1 SV=1	lcf:108899601/1e-89/microsomal glutathione S-transferase 1-like; K00799 glutathione S-transferase [EC:2.5.1.18]	NA
S.schlegelii_GLEAN_10007380	5.63288	4.77355	1.52732e-05	0.00033744	gi|736252768|ref|XP_010788629.1|/5.78307e-83/PREDICTED: cytokine-like protein 1 [Notothenia coriiceps]	Q9NRR1/2e-17/ CYTL1_HUMAN Cytokine-like protein 1 OS=Homo sapiens GN=CYTL1 PE=1 SV=1	NA	NA
S.schlegelii_GLEAN_10005710	5.6337	4.77413	1.59497e-05	0.000350368	gi|226443390|ref|NP_001139894.1|/8.12803e-118/Polyglutamine-binding protein 1 [Salmo salar] &gt;gi|221219770|gb|ACM08546.1| Polyglutamine-binding protein 1 [Salmo salar]	Q91VJ5/1e-91/ PQBP1_MOUSE Polyglutamine-binding protein 1 OS=Mus musculus GN=Pqbp1 PE=1 SV=1	sasa:100286483/2e-118/pqbp1; Polyglutamine-binding protein 1; K12865 polyglutamine-binding protein 1	molecular_function:GO:0005515//protein binding;
S.schlegelii_GLEAN_10021883	5.63485	4.77491	2.35761e-05	0.000508442	gi|808880852|gb|KKF28563.1|/1.43508e-73/Coiled-coil domain-containing protein 74A [Larimichthys crocea]	Q96LY2/9e-10/ CC74B_HUMAN Coiled-coil domain-containing protein 74B OS=Homo sapiens GN=CCDC74B PE=2 SV=1	NA	NA
S.schlegelii_GLEAN_10006184	5.63612	4.77558	1.30908e-05	0.000294303	gi|808857168|gb|KKF09781.1|/0/Nuclear factor 7, ovary [Larimichthys crocea]	Q02084/1e-82/ A33_PLEWA Zinc-binding protein A33 OS=Pleurodeles waltl PE=1 SV=2	lcf:108881168/0.0/E3 ubiquitin-protein ligase TRIM39-like; K12015 tripartite motif-containing protein 39 [EC:2.3.2.27]	cellular_component:GO:0005622//intracellular;molecular_function:GO:0005515//protein binding;GO:0008270//zinc ion binding;GO:0046872//metal ion binding;
S.schlegelii_GLEAN_10009078	5.64444	4.78088	1.84635e-05	0.000401569	gi|657523456|ref|XP_008305244.1|/1.73466e-108/PREDICTED: transcription cofactor vestigial-like protein 3 [Stegastes partitus]	Q99990/2e-08/ VGLL1_HUMAN Transcription cofactor vestigial-like protein 1 OS=Homo sapiens GN=VGLL1 PE=1 SV=1	NA	biological_process:GO:0006355//regulation of transcription, DNA-templated;cellular_component:GO:0005634//nucleus;
S.schlegelii_GLEAN_10016790	5.65282	4.78597	1.50739e-05	0.000333514	gi|734602976|ref|XP_010728470.1|/4.42571e-97/PREDICTED: uncharacterized protein C19orf60 homolog [Larimichthys crocea] &gt;gi|808869915|gb|KKF19850.1| Hypothetical protein EH28_14269 [Larimichthys crocea]	Q17Q97/1e-32/ CS060_BOVIN Uncharacterized protein C19orf60 homolog OS=Bos taurus PE=2 SV=1	NA	NA
S.schlegelii_GLEAN_10016310	5.65773	4.78893	7.31801e-06	0.000173408	gi|808881805|gb|KKF29305.1|/0/Dual specificity tyrosine-phosphorylation-regulated kinase 1A [Larimichthys crocea]	Q61214/0.0/ DYR1A_MOUSE Dual specificity tyrosine-phosphorylation-regulated kinase 1A OS=Mus musculus GN=Dyrk1a PE=1 SV=1	lcf:108899766/0.0/dyrk1a; dual specificity tyrosine-phosphorylation-regulated kinase 1A isoform X1; K08825 dual specificity tyrosine-phosphorylation-regulated kinase 1 [EC:2.7.12.1]	biological_process:GO:0006468//protein phosphorylation;GO:0046777//protein autophosphorylation;molecular_function:GO:0004672//protein kinase activity;GO:0004712//protein serine/threonine/tyrosine kinase activity;GO:0005524//ATP binding;
S.schlegelii_GLEAN_10010427	5.6598	4.79035	8.92348e-06	0.000206045	gi|229366976|gb|ACQ58468.1|/7.8779e-166/Nucleoporin NUP53 [Anoplopoma fimbria]	Q6P6X9/3e-121/ NUP53_DANRE Nucleoporin NUP53 OS=Danio rerio GN=nup35 PE=1 SV=1	xma:102229723/2e-158/nup35; nucleoporin 35; K14313 nuclear pore complex protein Nup53	NA
S.schlegelii_GLEAN_10005067	5.66464	4.79335	9.58768e-06	0.000219076	gi|499048714|ref|XP_004574899.1|/0/PREDICTED: E3 ubiquitin-protein ligase RING1 isoform X2 [Maylandia zebra]	Q66J69/3e-177/ RNG2A_XENLA E3 ubiquitin-protein ligase RING2-A OS=Xenopus laevis GN=rnf2-a PE=2 SV=1	mze:101466722/0.0/ring1; ring finger protein 1; K10695 E3 ubiquitin-protein ligase RNF1/2 [EC:2.3.2.27]	molecular_function:GO:0005515//protein binding;GO:0008270//zinc ion binding;GO:0046872//metal ion binding;
S.schlegelii_GLEAN_10011426	5.66832	4.79574	9.73454e-06	0.000222101	gi|736238371|ref|XP_010784245.1|/0/PREDICTED: acyl-coenzyme A thioesterase 1-like [Notothenia coriiceps] &gt;gi|736238375|ref|XP_010784246.1| PREDICTED: acyl-coenzyme A thioesterase 1-like [Notothenia coriiceps]	Q9QYR9/2e-145/ ACOT2_MOUSE Acyl-coenzyme A thioesterase 2, mitochondrial OS=Mus musculus GN=Acot2 PE=1 SV=2	ncc:104958218/0.0/acyl-coenzyme A thioesterase 1-like; K01068 acyl-coenzyme A thioesterase 1/2/4 [EC:3.1.2.2]	NA
S.schlegelii_GLEAN_10017638	5.66836	4.79546	8.57459e-06	0.000198587	gi|808884779|gb|KKF31671.1|/3.22178e-177/Deoxyribonuclease gamma [Larimichthys crocea]	O89107/1e-96/ DNSL3_RAT Deoxyribonuclease gamma OS=Rattus norvegicus GN=Dnase1l3 PE=1 SV=1	lco:104935655/2e-178/deoxyribonuclease gamma-like; K11995 deoxyribonuclease-1-like protein [EC:3.1.21.-]	biological_process:GO:0006308//DNA catabolic process;molecular_function:GO:0004536//deoxyribonuclease activity;GO:0016888//endodeoxyribonuclease activity, producing 5'-phosphomonoesters;
S.schlegelii_GLEAN_10013275	5.66913	4.796	7.55465e-06	0.000177714	gi|51922055|gb|AAU14142.1|/1.76612e-103/luteinizing hormone beta subunit [Sebastes schlegelii]	Q91121/5e-88/ GTHB2_MORSA Gonadotropin subunit beta-2 OS=Morone saxatilis GN=cgbb PE=2 SV=2	lcf:108872887/1e-90/gonadotropin subunit beta-2; K08521 luteinizing hormone beta polypeptide	cellular_component:GO:0005576//extracellular region;molecular_function:GO:0005179//hormone activity;
S.schlegelii_GLEAN_10008915	5.67113	4.79743	9.58298e-06	0.000219076	gi|657753841|ref|XP_008312437.1|/0/PREDICTED: 3-phosphoinositide-dependent protein kinase 1 [Cynoglossus semilaevis]	O55173/0.0/ PDPK1_RAT 3-phosphoinositide-dependent protein kinase 1 OS=Rattus norvegicus GN=Pdpk1 PE=1 SV=2	csem:103381714/0.0/pdpk1; 3-phosphoinositide-dependent protein kinase 1 isoform X2; K06276 3-phosphoinositide dependent protein kinase-1 [EC:2.7.11.1]	biological_process:GO:0006468//protein phosphorylation;molecular_function:GO:0004672//protein kinase activity;GO:0005524//ATP binding;
S.schlegelii_GLEAN_10004203	5.67366	4.79863	1.0327e-05	0.000234227	gi|808883824|gb|KKF30899.1|/1.15827e-75/Endoplasmic reticulum-Golgi intermediate compartment protein 3 [Larimichthys crocea]	Q803I2/5e-71/ ERGI3_DANRE Endoplasmic reticulum-Golgi intermediate compartment protein 3 OS=Danio rerio GN=ergic3 PE=2 SV=1	lco:104938204/8e-73/ergic3; ERGIC and golgi 3; K20367 endoplasmic reticulum-Golgi intermediate compartment protein 3	NA
S.schlegelii_GLEAN_10021473	5.67381	4.79895	7.58735e-06	0.00017814	gi|410902949|ref|XP_003964956.1|/8.47896e-148/PREDICTED: transmembrane protein 98 [Takifugu rubripes]	Q6INX1/2e-127/ TMM98_XENLA Transmembrane protein 98 OS=Xenopus laevis GN=tmem98 PE=2 SV=1	sasa:106565069/1e-09/ccndbp1; cyclin D1 binding protein 1; K21626 cyclin-D1-binding protein 1	NA
S.schlegelii_GLEAN_10012006	5.67866	4.80098	1.7552e-05	0.000382827	gi|808884075|gb|KKF31094.1|/0/Zinc finger protein 397 [Larimichthys crocea]	Q8NF99/7e-39/ ZN397_HUMAN Zinc finger protein 397 OS=Homo sapiens GN=ZNF397 PE=1 SV=2	amex:103047296/6e-44/gastrula zinc finger protein XlCGF26.1-like; K09228 KRAB domain-containing zinc finger protein	molecular_function:GO:0046872//metal ion binding;
S.schlegelii_GLEAN_10022779	5.68376	4.80513	7.52262e-06	0.000177434	gi|808867291|gb|KKF17871.1|/1.28648e-148/ES1 protein, mitochondrial [Larimichthys crocea] &gt;gi|808875029|gb|KKF24000.1| ES1 protein, mitochondrial [Larimichthys crocea]	P30042/4e-100/ ES1_HUMAN ES1 protein homolog, mitochondrial OS=Homo sapiens GN=C21orf33 PE=1 SV=3	NA	NA
S.schlegelii_GLEAN_10009134	5.68587	4.80644	7.16484e-06	0.00017004	gi|808859228|gb|KKF11418.1|/0/Syntaxin-5 [Larimichthys crocea]	Q08DB5/1e-152/ STX5_BOVIN Syntaxin-5 OS=Bos taurus GN=STX5 PE=2 SV=1	lcf:108872569/0.0/stx5; syntaxin-5 isoform X1; K08490 syntaxin 5	biological_process:GO:0006886//intracellular protein transport;cellular_component:GO:0016020//membrane;molecular_function:GO:0005484//SNAP receptor activity;GO:0005515//protein binding;
S.schlegelii_GLEAN_10008883	5.68715	4.80858	2.54947e-05	0.000545225	gi|939289512|ref|XP_014265227.1|/0/PREDICTED: major facilitator superfamily domain-containing protein 1-like [Maylandia zebra]	Q1JQC1/4e-68/ MFSD1_BOVIN Major facilitator superfamily domain-containing protein 1 OS=Bos taurus GN=MFSD1 PE=2 SV=1	tsp:Tsp_08498/8e-37/phosphatidylinositol 4-kinase beta; K19801 phosphatidylinositol 4-kinase B [EC:2.7.1.67]	biological_process:GO:0055085//transmembrane transport;cellular_component:GO:0016021//integral component of membrane;
S.schlegelii_GLEAN_10008318	5.68748	4.80758	8.67524e-06	0.000200615	gi|808880805|gb|KKF28529.1|/8.27313e-140/E3 ubiquitin-protein ligase RNF180 [Larimichthys crocea]	Q86T96/9e-64/ RN180_HUMAN E3 ubiquitin-protein ligase RNF180 OS=Homo sapiens GN=RNF180 PE=2 SV=2	lcf:108901116/3e-147/E3 ubiquitin-protein ligase RNF180-like; K15708 E3 ubiquitin-protein ligase RNF180 [EC:2.3.2.27]	molecular_function:GO:0005515//protein binding;GO:0008270//zinc ion binding;GO:0046872//metal ion binding;
S.schlegelii_GLEAN_10004305	5.69028	4.80967	1.20826e-05	0.000272434	gi|736190019|ref|XP_010771135.1|/1.42952e-38/PREDICTED: uncharacterized protein LOC104946924 [Notothenia coriiceps]	NA	NA	NA
S.schlegelii_GLEAN_10017810	5.69132	4.80999	9.95548e-06	0.000226469	gi|736298045|ref|XP_010792135.1|/2.13728e-108/PREDICTED: tumor protein p53-inducible nuclear protein 2 isoform X4 [Notothenia coriiceps]	Q8IXH6/3e-16/ T53I2_HUMAN Tumor protein p53-inducible nuclear protein 2 OS=Homo sapiens GN=TP53INP2 PE=1 SV=2	ola:101160480/1e-98/tumor protein p53-inducible nuclear protein 2; K21247 tumor protein p53-inducible nuclear protein 2	NA
S.schlegelii_GLEAN_10003618	5.69228	4.81065	1.56403e-05	0.000344063	gi|657545140|ref|XP_008277930.1|/0/PREDICTED: E3 ubiquitin/ISG15 ligase TRIM25-like [Stegastes partitus]	Q61510/2e-38/ TRI25_MOUSE E3 ubiquitin/ISG15 ligase TRIM25 OS=Mus musculus GN=Trim25 PE=1 SV=2	lco:104933205/0.0/E3 ubiquitin/ISG15 ligase TRIM25-like; K10652 tripartite motif-containing protein 25 [EC:2.3.2.27]	cellular_component:GO:0005622//intracellular;molecular_function:GO:0005515//protein binding;GO:0008270//zinc ion binding;
S.schlegelii_GLEAN_10002878	5.69563	4.81251	7.71485e-06	0.000180582	gi|584028779|ref|XP_006808916.1|/1.6603e-139/PREDICTED: ceramide-1-phosphate transfer protein-like [Neolamprologus brichardi]	Q5TA50/2e-37/ CPTP_HUMAN Ceramide-1-phosphate transfer protein OS=Homo sapiens GN=CPTP PE=1 SV=1	NA	biological_process:GO:0046836//glycolipid transport;cellular_component:GO:0005737//cytoplasm;molecular_function:GO:0017089//glycolipid transporter activity;GO:0051861//glycolipid binding;
S.schlegelii_GLEAN_10018189	5.69801	4.81404	7.8003e-06	0.000182304	gi|348532833|ref|XP_003453910.1|/0/PREDICTED: mothers against decapentaplegic homolog 4-like [Oreochromis niloticus] &gt;gi|908471385|ref|XP_013132169.1| PREDICTED: mothers against decapentaplegic homolog 4-like [Oreochromis niloticus]	Q13485/0.0/ SMAD4_HUMAN Mothers against decapentaplegic homolog 4 OS=Homo sapiens GN=SMAD4 PE=1 SV=1	mze:101481185/0.0/mothers against decapentaplegic homolog 4-like; K04501 mothers against decapentaplegic homolog 4	biological_process:GO:0006355//regulation of transcription, DNA-templated;GO:0007179//transforming growth factor beta receptor signaling pathway;cellular_component:GO:0005622//intracellular;GO:0005667//transcription factor complex;molecular_function:GO:0003700//sequence-specific DNA binding transcription factor activity;
S.schlegelii_GLEAN_10010522	5.70037	4.81553	7.37284e-06	0.000174437	gi|229366330|gb|ACQ58145.1|/6.60117e-93/39S ribosomal protein L30, mitochondrial precursor [Anoplopoma fimbria]	Q4R6U7/5e-55/ RM30_MACFA 39S ribosomal protein L30, mitochondrial OS=Macaca fascicularis GN=MRPL30 PE=2 SV=1	lco:104932323/9e-88/mrpl30; mitochondrial ribosomal protein L30; K02907 large subunit ribosomal protein L30	NA
S.schlegelii_GLEAN_10021106	5.70207	4.81654	9.35009e-06	0.000215248	gi|657554540|ref|XP_008281739.1|/2.2941e-180/PREDICTED: E3 ubiquitin-protein ligase DTX3L-like [Stegastes partitus]	Q8TDB6/4e-75/ DTX3L_HUMAN E3 ubiquitin-protein ligase DTX3L OS=Homo sapiens GN=DTX3L PE=1 SV=1	lcf:108897991/0.0/E3 ubiquitin-protein ligase DTX3L-like isoform X1; K06058 deltex [EC:2.3.2.27]	molecular_function:GO:0005515//protein binding;GO:0008270//zinc ion binding;
S.schlegelii_GLEAN_10004311	5.703	4.81714	7.6187e-06	0.000178603	gi|13161882|emb|CAC33027.1|/6.32443e-74/Lsm4 protein [Takifugu rubripes]	Q9QXA5/7e-53/ LSM4_MOUSE U6 snRNA-associated Sm-like protein LSm4 OS=Mus musculus GN=Lsm4 PE=1 SV=1	tru:101078563/2e-74/lsm4; LSM4 homolog, U6 small nuclear RNA and mRNA degradation associated; K12623 U6 snRNA-associated Sm-like protein LSm4	biological_process:GO:0006396//RNA processing;
S.schlegelii_GLEAN_10007159	5.70748	4.81994	1.17527e-05	0.000265386	gi|548415825|ref|XP_005741719.1|/0/PREDICTED: prolyl 3-hydroxylase OGFOD1 isoform X1 [Pundamilia nyererei]	Q5R4R3/0.0/ OGFD1_PONAB Prolyl 3-hydroxylase OGFOD1 OS=Pongo abelii GN=OGFOD1 PE=2 SV=1	aga:AgaP_AGAP002933/2e-58/AGAP002933-PB; K05291 phosphatidylinositol glycan, class S	biological_process:GO:0055114//oxidation-reduction process;molecular_function:GO:0005506//iron ion binding;GO:0016491//oxidoreductase activity;GO:0016705//oxidoreductase activity, acting on paired donors, with incorporation or reduction of molecular oxygen;GO:0016706//oxidoreductase activity, acting on paired donors, with incorporation or reduction of molecular oxygen, 2-oxoglutarate as one donor…
S.schlegelii_GLEAN_10005427	5.71306	4.82347	7.05256e-06	0.000167895	gi|657548559|ref|XP_008279163.1|/0/PREDICTED: protein FAM83F [Stegastes partitus]	Q8NEG4/8e-110/ FA83F_HUMAN Protein FAM83F OS=Homo sapiens GN=FAM83F PE=1 SV=1	xla:108702758/2e-54/fam83d.S; family with sequence similarity 83 member D S homeolog; K16805 protein FAM83D	NA
S.schlegelii_GLEAN_10022893	5.71716	4.82613	1.2307e-05	0.000277089	gi|835868944|ref|XP_012777283.1|/0/PREDICTED: adhesion G-protein coupled receptor G2-like [Maylandia zebra]	Q86Y34/2e-52/ AGRG3_HUMAN Adhesion G protein-coupled receptor G3 OS=Homo sapiens GN=ADGRG3 PE=1 SV=1	lcf:108892452/0.0/adhesion G protein-coupled receptor G3-like; K08451 G protein-coupled receptor 64	biological_process:GO:0007166//cell surface receptor signaling pathway;GO:0007186//G-protein coupled receptor signaling pathway;cellular_component:GO:0016020//membrane;GO:0016021//integral component of membrane;molecular_function:GO:0004888//transmembrane signaling receptor activity;GO:0004930//G-protein coupled receptor activity;
S.schlegelii_GLEAN_10019246	5.72047	4.82857	1.13439e-05	0.000256533	gi|736191875|ref|XP_010771629.1|/0/PREDICTED: abhydrolase domain-containing protein 3-like isoform X1 [Notothenia coriiceps]	Q8WU67/5e-154/ ABHD3_HUMAN Phospholipase ABHD3 OS=Homo sapiens GN=ABHD3 PE=1 SV=2	ncc:104947340/0.0/abhydrolase domain-containing protein 3-like isoform X1; K13696 abhydrolase domain-containing protein 1/3	NA
S.schlegelii_GLEAN_10020649	5.73165	4.83544	5.42874e-06	0.00013148	gi|548492952|ref|XP_005749599.1|/9.33542e-55/PREDICTED: tight junction-associated protein 1-like [Pundamilia nyererei]	Q6R6L0/9e-14/ BEGIN_SHEEP Brain-enriched guanylate kinase-associated protein OS=Ovis aries GN=BEGAIN PE=2 SV=1	tru:101072987/7e-17/tjap1; tight junction associated protein 1; K06105 tight junction protein 4	NA
S.schlegelii_GLEAN_10003222	5.73193	4.83557	4.89964e-06	0.000119609	gi|657578017|ref|XP_008292864.1|/0/PREDICTED: cell cycle control protein 50A-like [Stegastes partitus]	Q5F362/1e-179/ CC50A_CHICK Cell cycle control protein 50A OS=Gallus gallus GN=TMEM30A PE=2 SV=1	ccar:109070702/1e-30/fibulin-2-like; K17307 fibulin 1/2	biological_process:GO:0015914//phospholipid transport;cellular_component:GO:0016020//membrane;GO:0016021//integral component of membrane;
S.schlegelii_GLEAN_10008133	5.73761	4.83896	3.9605e-06	0.000100187	gi|736185293|ref|XP_010769897.1|/0/PREDICTED: tau-tubulin kinase 2-like isoform X2 [Notothenia coriiceps]	Q6IQ55/0.0/ TTBK2_HUMAN Tau-tubulin kinase 2 OS=Homo sapiens GN=TTBK2 PE=1 SV=2	lcf:108895963/0.0/LOW QUALITY PROTEIN: tau-tubulin kinase 2-like; K08815 tau tubulin kinase [EC:2.7.11.26]	biological_process:GO:0006468//protein phosphorylation;molecular_function:GO:0004672//protein kinase activity;GO:0005524//ATP binding;
S.schlegelii_GLEAN_10013820	5.73816	4.83935	4.41189e-06	0.000109619	gi|734624529|ref|XP_010740318.1|/3.78126e-107/PREDICTED: lysine-rich nucleolar protein 1 [Larimichthys crocea]	Q1ED39/2e-23/ KNOP1_HUMAN Lysine-rich nucleolar protein 1 OS=Homo sapiens GN=KNOP1 PE=1 SV=1	tng:GSTEN00026287G001/5e-45/unnamed protein product; K04619 G protein-coupled receptor family C group 5 member B	NA
S.schlegelii_GLEAN_10008267	5.73979	4.84033	3.73232e-06	9.61394e-05	gi|808886833|gb|KKF33337.1|/0/Calreticulin [Larimichthys crocea]	P15253/0.0/ CALR_RABIT Calreticulin OS=Oryctolagus cuniculus GN=CALR PE=1 SV=1	lco:104929336/0.0/calreticulin-like; K08057 calreticulin	biological_process:GO:0006457//protein folding;cellular_component:GO:0005783//endoplasmic reticulum;molecular_function:GO:0005509//calcium ion binding;GO:0051082//unfolded protein binding;
S.schlegelii_GLEAN_10009604	5.74675	4.84475	4.20459e-06	0.000105493	gi|617393608|ref|XP_007550220.1|/0/PREDICTED: gamma-enolase [Poecilia formosa] &gt;gi|961866340|ref|XP_014893941.1| PREDICTED: gamma-enolase [Poecilia latipinna] &gt;gi|961913528|ref|XP_014859313.1| PREDICTED: gamma-enolase [Poecilia mexicana]	P07323/0.0/ ENOG_RAT Gamma-enolase OS=Rattus norvegicus GN=Eno2 PE=1 SV=2	lcf:108880749/0.0/eno2; gamma-enolase; K01689 enolase [EC:4.2.1.11]	biological_process:GO:0006096//glycolytic process;cellular_component:GO:0000015//phosphopyruvate hydratase complex;molecular_function:GO:0000287//magnesium ion binding;GO:0004634//phosphopyruvate hydratase activity;
S.schlegelii_GLEAN_10016826	5.75032	4.84701	3.78604e-06	9.67927e-05	gi|736296644|ref|XP_010791635.1|/2.7689e-118/PREDICTED: serine protease 57-like [Notothenia coriiceps]	Q14B24/2e-49/ PRS57_MOUSE Serine protease 57 OS=Mus musculus GN=Prss57 PE=2 SV=2	lcm:102354524/3e-44/GZMM; granzyme M; K08649 granzyme M [EC:3.4.21.-]	biological_process:GO:0006508//proteolysis;molecular_function:GO:0004252//serine-type endopeptidase activity;
S.schlegelii_GLEAN_10019641	5.75108	4.84761	4.66887e-06	0.000114705	gi|808870972|gb|KKF20742.1|/0/UDP-glucuronosyltransferase 2A1 [Larimichthys crocea]	P06133/5e-147/ UD2B4_HUMAN UDP-glucuronosyltransferase 2B4 OS=Homo sapiens GN=UGT2B4 PE=1 SV=2	hcq:109507597/0.0/UDP-glucuronosyltransferase 2C1-like isoform X1; K00699 glucuronosyltransferase [EC:2.4.1.17]	biological_process:GO:0008152//metabolic process;molecular_function:GO:0016758//transferase activity, transferring hexosyl groups;
S.schlegelii_GLEAN_10007602	5.75287	4.84772	9.3885e-06	0.000215809	gi|734600293|ref|XP_010755231.1|/2.46858e-73/PREDICTED: uncharacterized protein LOC104940344 [Larimichthys crocea] &gt;gi|734600295|ref|XP_010755232.1| PREDICTED: uncharacterized protein LOC104940344 [Larimichthys crocea]	NA	sfm:108927387/2e-26/uncharacterized protein LOC108927387 isoform X1; K22190 membrane-spanning 4-domains subfamily A member 3/4/8/12/15/18	cellular_component:GO:0016021//integral component of membrane;
S.schlegelii_GLEAN_10004497	5.75607	4.85072	4.40173e-06	0.000109544	gi|499044196|ref|XP_004572696.1|/0/PREDICTED: carboxy-terminal kinesin 2 [Maylandia zebra] &gt;gi|835997076|ref|XP_004572695.2| PREDICTED: carboxy-terminal kinesin 2 [Maylandia zebra]	P79955/3e-143/ CTK2_XENLA Carboxy-terminal kinesin 2 OS=Xenopus laevis PE=2 SV=1	lcf:108881909/0.0/carboxy-terminal kinesin 2-like; K10405 kinesin family member C1	biological_process:GO:0007018//microtubule-based movement;cellular_component:GO:0005871//kinesin complex;molecular_function:GO:0003777//microtubule motor activity;GO:0005524//ATP binding;GO:0008017//microtubule binding;
S.schlegelii_GLEAN_10023546	5.75637	4.85088	4.50952e-06	0.000111683	gi|736191382|ref|XP_010771505.1|/0/PREDICTED: replication factor C subunit 5 [Notothenia coriiceps]	Q9D0F6/4e-163/ RFC5_MOUSE Replication factor C subunit 5 OS=Mus musculus GN=Rfc5 PE=1 SV=1	ncc:104947226/0.0/rfc5; replication factor C subunit 5; K10756 replication factor C subunit 3/5	molecular_function:GO:0005524//ATP binding;
S.schlegelii_GLEAN_10009002	5.75652	4.85114	6.07794e-06	0.00014628	gi|928050757|ref|XP_013874513.1|/1.01551e-80/PREDICTED: polyadenylate-binding protein-interacting protein 2B isoform X1 [Austrofundulus limnaeus]	Q9ULR5/2e-49/ PAI2B_HUMAN Polyadenylate-binding protein-interacting protein 2B OS=Homo sapiens GN=PAIP2B PE=1 SV=2	NA	NA
S.schlegelii_GLEAN_10009365	5.75718	4.8514	4.21439e-06	0.000105566	gi|584011355|ref|XP_006800593.1|/4.37027e-84/PREDICTED: vasodilator-stimulated phosphoprotein-like [Neolamprologus brichardi]	Q2TA49/5e-67/ VASP_BOVIN Vasodilator-stimulated phosphoprotein OS=Bos taurus GN=VASP PE=2 SV=3	mze:101486503/4e-83/vasodilator-stimulated phosphoprotein-like; K06274 vasodilator-stimulated phosphoprotein	biological_process:GO:0008154//actin polymerization or depolymerization;GO:0051289//protein homotetramerization;cellular_component:GO:0005856//cytoskeleton;molecular_function:GO:0003779//actin binding;GO:0017124//SH3 domain binding;
S.schlegelii_GLEAN_10015476	5.75754	4.8516	3.7948e-06	9.67927e-05	gi|808877725|gb|KKF26132.1|/0/Carbohydrate sulfotransferase 1 [Larimichthys crocea]	Q9EQC0/7e-148/ CHST1_MOUSE Carbohydrate sulfotransferase 1 OS=Mus musculus GN=Chst1 PE=2 SV=1	lco:104935271/0.0/carbohydrate sulfotransferase 1; K01022 keratan sulfate 6-sulfotransferase 1 [EC:2.8.2.21]	cellular_component:GO:0016020//membrane;molecular_function:GO:0005044//scavenger receptor activity;GO:0008146//sulfotransferase activity;
S.schlegelii_GLEAN_10011627	5.76081	4.8538	4.61502e-06	0.000113929	gi|734608710|ref|XP_010731624.1|/5.53852e-149/PREDICTED: sorting nexin-16-like [Larimichthys crocea]	Q8C080/6e-87/ SNX16_MOUSE Sorting nexin-16 OS=Mus musculus GN=Snx16 PE=1 SV=2	lco:104920920/1e-148/sorting nexin-16-like; K17928 sorting nexin-16	molecular_function:GO:0035091//phosphatidylinositol binding;
S.schlegelii_GLEAN_10011882	5.76248	4.8554	8.29286e-06	0.000192935	gi|808868356|gb|KKF18692.1|/6.33914e-141/hypothetical protein EH28_19972 [Larimichthys crocea]	NA	ncc:104950769/2e-28/htr5a; 5-hydroxytryptamine receptor 5A; K04161 5-hydroxytryptamine receptor 5	NA
S.schlegelii_GLEAN_10011342	5.76594	4.85702	4.92761e-06	0.00012	gi|657550470|ref|XP_008279834.1|/4.96496e-174/PREDICTED: transcription cofactor vestigial-like protein 2 isoform X2 [Stegastes partitus]	Q8BGW8/2e-87/ VGLL2_MOUSE Transcription cofactor vestigial-like protein 2 OS=Mus musculus GN=Vgll2 PE=1 SV=1	NA	biological_process:GO:0006355//regulation of transcription, DNA-templated;cellular_component:GO:0005634//nucleus;
S.schlegelii_GLEAN_10004069	5.77338	4.86168	3.73789e-06	9.61394e-05	gi|734646975|ref|XP_010752652.1|/4.23655e-100/PREDICTED: nuclear receptor coactivator 7-like isoform X2 [Larimichthys crocea]	Q5ZMS4/2e-46/ NCOA7_CHICK Nuclear receptor coactivator 7 OS=Gallus gallus GN=NCOA7 PE=2 SV=1	myi:110463658/7e-13/uncharacterized protein LOC110463658; K21841 TBC1 domain family member 24	NA
S.schlegelii_GLEAN_10008296	5.77346	4.86215	6.76721e-06	0.000161352	gi|736202105|ref|XP_010774773.1|/0/PREDICTED: fumarate hydratase, mitochondrial [Notothenia coriiceps]	Q7SX99/0.0/ FUMH_DANRE Fumarate hydratase, mitochondrial OS=Danio rerio GN=fh PE=2 SV=1	ncc:104950031/0.0/fh; fumarate hydratase, mitochondrial; K01679 fumarate hydratase, class II [EC:4.2.1.2]	biological_process:GO:0006099//tricarboxylic acid cycle;molecular_function:GO:0003824//catalytic activity;GO:0016829//lyase activity;
S.schlegelii_GLEAN_10004026	5.77634	4.86357	3.72413e-06	9.61075e-05	gi|734647267|ref|XP_010752814.1|/0/PREDICTED: sorting nexin-21 [Larimichthys crocea]	Q3UR97/2e-65/ SNX21_MOUSE Sorting nexin-21 OS=Mus musculus GN=Snx21 PE=1 SV=1	lcf:108876344/0.0/snx21; sorting nexin-21; K17932 sorting nexin-21	molecular_function:GO:0035091//phosphatidylinositol binding;
S.schlegelii_GLEAN_10010487	5.77766	4.86442	3.70682e-06	9.5822e-05	gi|52783263|sp|Q9DFQ7.2|RL24_GILMI/1.1306e-95/RecName: Full=60S ribosomal protein L24	Q9DFQ7/2e-97/ RL24_GILMI 60S ribosomal protein L24 OS=Gillichthys mirabilis GN=rpl24 PE=2 SV=2	csem:103391676/3e-92/rpl24; 60S ribosomal protein L24; K02896 large subunit ribosomal protein L24e	NA
S.schlegelii_GLEAN_10003145	5.78035	4.86614	4.93131e-06	0.00012	gi|974104252|ref|XP_015251020.1|/0/PREDICTED: LOW QUALITY PROTEIN: NACHT, LRR and PYD domains-containing protein 3-like [Cyprinodon variegatus]	A0ZSK3/2e-37/ STXA_SYNVE Neoverrucotoxin subunit alpha OS=Synanceia verrucosa PE=1 SV=1	xma:102233962/0.0/NACHT, LRR and PYD domains-containing protein 3-like; K12800 NACHT, LRR and PYD domains-containing protein 3	molecular_function:GO:0005515//protein binding;
S.schlegelii_GLEAN_10013169	5.78159	4.8669	3.90113e-06	9.90114e-05	gi|736308089|ref|XP_010795196.1|/1.42168e-108/PREDICTED: uncharacterized protein LOC104967440 [Notothenia coriiceps]	NA	NA	molecular_function:GO:0005515//protein binding;
S.schlegelii_GLEAN_10000222	5.78307	4.86814	6.23278e-06	0.000149538	gi|734648756|ref|XP_010753623.1|/0/PREDICTED: spectrin beta chain, non-erythrocytic 4-like [Larimichthys crocea]	Q9H254/2e-73/ SPTN4_HUMAN Spectrin beta chain, non-erythrocytic 4 OS=Homo sapiens GN=SPTBN4 PE=1 SV=2	lcf:108893882/0.0/spectrin beta chain, non-erythrocytic 4-like; K06115 spectrin beta	molecular_function:GO:0005515//protein binding;
S.schlegelii_GLEAN_10023457	5.78313	4.86797	4.11704e-06	0.000103805	gi|736243746|ref|XP_010785794.1|/0/PREDICTED: neurofilament light polypeptide-like [Notothenia coriiceps]	Q02916/5e-160/ NFL_COTJA Neurofilament light polypeptide OS=Coturnix japonica GN=NEFL PE=3 SV=3	ncc:104959585/0.0/neurofilament light polypeptide-like; K04572 neurofilament light polypeptide	cellular_component:GO:0005882//intermediate filament;GO:0005883//neurofilament;molecular_function:GO:0005198//structural molecule activity;
S.schlegelii_GLEAN_10016139	5.78833	4.87125	3.81363e-06	9.71116e-05	gi|808885671|gb|KKF32378.1|/0/Calumenin-B [Larimichthys crocea]	B5X4E0/0.0/ CALUB_SALSA Calumenin-B OS=Salmo salar GN=calub PE=2 SV=1	shx:MS3_01466/1e-38/Band 7 protein; K17286 erythrocyte band 7 integral membrane protein	molecular_function:GO:0005509//calcium ion binding;
S.schlegelii_GLEAN_10007024	5.78876	4.87109	8.34993e-06	0.000193968	gi|317418705|emb|CBN80743.1|/0/Adenosine receptor A1 [Dicentrarchus labrax]	P28190/2e-116/ AA1R_BOVIN Adenosine receptor A1 OS=Bos taurus GN=ADORA1 PE=2 SV=3	ncc:104941391/0.0/adenosine receptor A1-like; K04265 adenosine A1 receptor	biological_process:GO:0001973//adenosine receptor signaling pathway;GO:0007186//G-protein coupled receptor signaling pathway;cellular_component:GO:0016021//integral component of membrane;molecular_function:GO:0001609//G-protein coupled adenosine receptor activity;GO:0004930//G-protein coupled receptor activity;
S.schlegelii_GLEAN_10024002	5.79092	4.8729	3.74452e-06	9.6149e-05	gi|734626773|ref|XP_010741543.1|/0/PREDICTED: protein aurora borealis [Larimichthys crocea]	Q5U3U6/9e-132/ BORA_DANRE Protein aurora borealis OS=Danio rerio GN=bora PE=2 SV=1	lco:104928876/0.0/bora; bora, aurora kinase A activator; K16831 protein aurora borealis	NA
S.schlegelii_GLEAN_10023364	5.7911	4.87343	7.89091e-06	0.000184141	gi|734631965|ref|XP_010744392.1|/0/PREDICTED: early growth response protein 3 [Larimichthys crocea]	P43300/0.0/ EGR3_MOUSE Early growth response protein 3 OS=Mus musculus GN=Egr3 PE=2 SV=2	lcf:108878740/0.0/egr3; early growth response protein 3; K12497 early growth response protein 3	molecular_function:GO:0046872//metal ion binding;
S.schlegelii_GLEAN_10010139	5.79275	4.87432	5.4562e-06	0.000131937	gi|734600006|ref|XP_010755075.1|/9.25378e-136/PREDICTED: uncharacterized protein LOC104940224 isoform X2 [Larimichthys crocea]	Q7Z5L3/4e-14/ C1QL2_HUMAN Complement C1q-like protein 2 OS=Homo sapiens GN=C1QL2 PE=2 SV=2	lcf:108891176/1e-21/LOW QUALITY PROTEIN: complement C1q tumor necrosis factor-related protein 3-like; K18744 caprin-2	NA
S.schlegelii_GLEAN_10003135	5.79417	4.875	4.12438e-06	0.000103819	gi|939313320|ref|XP_014262743.1|/0/PREDICTED: GTPase IMAP family member 8-like [Maylandia zebra]	Q9NUV9/6e-50/ GIMA4_HUMAN GTPase IMAP family member 4 OS=Homo sapiens GN=GIMAP4 PE=1 SV=1	amex:111196761/6e-61/interaptin-like; K18626 trichohyalin	molecular_function:GO:0005525//GTP binding;
S.schlegelii_GLEAN_10015990	5.79422	4.875	4.52456e-06	0.000111875	gi|657588365|ref|XP_008298519.1|/6.36456e-125/PREDICTED: mediator of RNA polymerase II transcription subunit 30-like [Stegastes partitus]	Q0IHI6/1e-52/ MED30_XENLA Mediator of RNA polymerase II transcription subunit 30 OS=Xenopus laevis GN=med30 PE=2 SV=1	hcq:109518057/5e-120/mediator of RNA polymerase II transcription subunit 30-like isoform X1; K15143 mediator of RNA polymerase II transcription subunit 30	NA
S.schlegelii_GLEAN_10018962	5.79514	4.87559	4.18369e-06	0.00010514	gi|736160004|ref|XP_010785052.1|/0/PREDICTED: mitochondrial ribonuclease P protein 1 [Notothenia coriiceps]	A4IHS0/9e-130/ MRRP1_XENTR Mitochondrial ribonuclease P protein 1 OS=Xenopus tropicalis GN=trmt10c PE=2 SV=1	ncc:104958915/0.0/trmt10c; mitochondrial ribonuclease P protein 1; K17654 mitochondrial ribonuclease P protein 1 [EC:2.1.1.-]	cellular_component:GO:0005739//mitochondrion;
S.schlegelii_GLEAN_10003507	5.79649	4.87634	6.21003e-06	0.000149225	gi|47224722|emb|CAG00316.1|/9.23383e-102/unnamed protein product [Tetraodon nigroviridis]	NA	lcf:108873100/1e-88/protein FAM161A-like; K16772 protein FAM161A	NA
S.schlegelii_GLEAN_10018356	5.79717	4.87694	4.63379e-06	0.000114025	gi|229366722|gb|ACQ58341.1|/1.40128e-81/Nattectin precursor [Anoplopoma fimbria] &gt;gi|229367852|gb|ACQ58906.1| Nattectin precursor [Anoplopoma fimbria]	P81018/4e-23/ LADD_ONCMY Ladderlectin OS=Oncorhynchus mykiss PE=1 SV=2	ncc:104967547/6e-55/ladderlectin-like; K22244 regenerating islet-derived protein 4	NA
S.schlegelii_GLEAN_10007830	5.79744	4.87721	5.04911e-06	0.000122479	gi|734650801|ref|XP_010754744.1|/0/PREDICTED: alpha-1,6-mannosyl-glycoprotein 2-beta-N-acetylglucosaminyltransferase-like [Larimichthys crocea]	O19071/6e-145/ MGAT2_PIG Alpha-1,6-mannosyl-glycoprotein 2-beta-N-acetylglucosaminyltransferase OS=Sus scrofa GN=MGAT2 PE=3 SV=1	lco:104939903/0.0/alpha-1,6-mannosyl-glycoprotein 2-beta-N-acetylglucosaminyltransferase-like; K00736 alpha-1,6-mannosyl-glycoprotein beta-1,2-N-acetylglucosaminyltransferase [EC:2.4.1.143]	biological_process:GO:0009312//oligosaccharide biosynthetic process;cellular_component:GO:0005795//Golgi stack;GO:0016021//integral component of membrane;molecular_function:GO:0008455//alpha-1,6-mannosylglycoprotein 2-beta-N-acetylglucosaminyltransferase activity;
S.schlegelii_GLEAN_10008428	5.79908	4.87818	4.32638e-06	0.000108019	gi|808867769|gb|KKF18271.1|/0/Transmembrane protein 130 [Larimichthys crocea] &gt;gi|808882432|gb|KKF29823.1| Transmembrane protein 130 [Larimichthys crocea]	Q5R6F5/4e-27/ TM130_PONAB Transmembrane protein 130 OS=Pongo abelii GN=TMEM130 PE=2 SV=1	NA	NA
S.schlegelii_GLEAN_10023099	5.79978	4.87858	2.17516e-06	5.89057e-05	gi|938070369|gb|KPP69064.1|/0/actin, alpha cardiac muscle 1-like [Scleropages formosus]	Q6P640/0.0/ ACTC_XENTR Actin, alpha cardiac muscle 1 OS=Xenopus tropicalis GN=actc1 PE=2 SV=1	sasa:106601553/0.0/actc1; actin, alpha, cardiac muscle 1; K12314 actin, alpha cardiac muscle	NA
S.schlegelii_GLEAN_10003011	5.80525	4.88207	2.40913e-06	6.40002e-05	gi|808858567|gb|KKF10925.1|/0/Cytochrome P450 2K1 [Larimichthys crocea]	Q92090/0.0/ CP2K1_ONCMY Cytochrome P450 2K1 OS=Oncorhynchus mykiss GN=cyp2k1 PE=2 SV=1	lco:104925694/0.0/cytochrome P450 2K1-like; K17854 cytochrome P450 family 2 subfamily K	biological_process:GO:0055114//oxidation-reduction process;molecular_function:GO:0005506//iron ion binding;GO:0016705//oxidoreductase activity, acting on paired donors, with incorporation or reduction of molecular oxygen;GO:0020037//heme binding;
S.schlegelii_GLEAN_10020621	5.80539	4.88224	2.31285e-06	6.21957e-05	gi|736181199|ref|XP_010768702.1|/0/PREDICTED: cytoskeleton-associated protein 2-like [Notothenia coriiceps]	Q8WWK9/1e-18/ CKAP2_HUMAN Cytoskeleton-associated protein 2 OS=Homo sapiens GN=CKAP2 PE=1 SV=1	lcf:108893456/0.0/cytoskeleton-associated protein 2-like; K16769 cytoskeleton-associated protein 2	NA
S.schlegelii_GLEAN_10004230	5.80856	4.88428	2.80439e-06	7.37352e-05	gi|657588246|ref|XP_008298454.1|/2.8241e-140/PREDICTED: heterogeneous nuclear ribonucleoprotein C-like [Stegastes partitus] &gt;gi|657588248|ref|XP_008298455.1| PREDICTED: heterogeneous nuclear ribonucleoprotein C-like [Stegastes partitus]	P19600/6e-99/ HNRPC_XENLA Heterogeneous nuclear ribonucleoprotein C OS=Xenopus laevis GN=hnrnpc PE=2 SV=1	xma:102230228/1e-133/heterogeneous nuclear ribonucleoprotein C-like; K12884 heterogeneous nuclear ribonucleoprotein C1/C2	molecular_function:GO:0003676//nucleic acid binding;
S.schlegelii_GLEAN_10017748	5.81224	4.88661	2.10288e-06	5.75574e-05	gi|743692451|gb|AJC52397.1|/3.49227e-155/macrophage colony-stimulating factor 2 [Epinephelus coioides]	NA	amex:103035984/5e-71/uncharacterized protein LOC103035984 isoform X1; K05453 macrophage colony-stimulating factor 1	cellular_component:GO:0016021//integral component of membrane;molecular_function:GO:0005125//cytokine activity;GO:0008083//growth factor activity;
S.schlegelii_GLEAN_10014952	5.81274	4.88687	2.35757e-06	6.3067e-05	gi|584020742|ref|XP_006805054.1|/3.24676e-165/PREDICTED: 39S ribosomal protein L39, mitochondrial-like [Neolamprologus brichardi]	Q9NYK5/9e-86/ RM39_HUMAN 39S ribosomal protein L39, mitochondrial OS=Homo sapiens GN=MRPL39 PE=1 SV=3	mze:101474684/5e-163/mrpl39; mitochondrial ribosomal protein L39; K17420 large subunit ribosomal protein L39	NA
S.schlegelii_GLEAN_10000941	5.81301	4.88714	2.18291e-06	5.90116e-05	gi|657553858|ref|XP_008281367.1|/1.93046e-177/PREDICTED: methylmalonic aciduria and homocystinuria type D homolog, mitochondrial-like [Stegastes partitus]	Q9H3L0/4e-99/ MMAD_HUMAN Methylmalonic aciduria and homocystinuria type D protein, mitochondrial OS=Homo sapiens GN=MMADHC PE=1 SV=2	NA	biological_process:GO:0009235//cobalamin metabolic process;
S.schlegelii_GLEAN_10021771	5.81666	4.88951	3.76904e-06	9.6617e-05	gi|657553190|ref|XP_008280997.1|/0/PREDICTED: phosducin-like protein [Stegastes partitus]	Q13371/1e-135/ PHLP_HUMAN Phosducin-like protein OS=Homo sapiens GN=PDCL PE=1 SV=3	lco:104924489/0.0/ptgs1; prostaglandin G/H synthase 1; K00509 prostaglandin-endoperoxide synthase 1 [EC:1.14.99.1]	NA
S.schlegelii_GLEAN_10022715	5.81848	4.89063	1.89058e-06	5.24006e-05	gi|734616308|ref|XP_010735790.1|/0/PREDICTED: leucine-rich repeat transmembrane neuronal protein 2 [Larimichthys crocea]	Q8BGA3/0.0/ LRRT2_MOUSE Leucine-rich repeat transmembrane neuronal protein 2 OS=Mus musculus GN=Lrrtm2 PE=2 SV=1	ncc:104959832/0.0/lrrtm2; leucine-rich repeat transmembrane neuronal protein 2; K16665 leucine-rich repeat transmembrane neuronal protein 1/2	molecular_function:GO:0005515//protein binding;
S.schlegelii_GLEAN_10003497	5.82308	4.89369	2.38139e-06	6.34832e-05	gi|961842466|ref|XP_014887698.1|/8.46823e-107/PREDICTED: fibrinogen alpha chain-like [Poecilia latipinna]	P06399/3e-22/ FIBA_RAT Fibrinogen alpha chain OS=Rattus norvegicus GN=Fga PE=1 SV=3	csem:103389614/9e-96/fibrinogen alpha chain-like isoform X1; K03903 fibrinogen alpha chain	biological_process:GO:0007165//signal transduction;GO:0030168//platelet activation;GO:0051258//protein polymerization;cellular_component:GO:0005577//fibrinogen complex;molecular_function:GO:0005102//receptor binding;GO:0030674//protein binding, bridging;
S.schlegelii_GLEAN_10020563	5.82521	4.89501	2.1583e-06	5.86561e-05	gi|736294607|ref|XP_010790906.1|/0/PREDICTED: phosphatidylinositol-glycan biosynthesis class W protein [Notothenia coriiceps] &gt;gi|736294610|ref|XP_010790907.1| PREDICTED: phosphatidylinositol-glycan biosynthesis class W protein [Notothenia coriiceps]	Q7TSN4/8e-143/ PIGW_RAT Phosphatidylinositol-glycan biosynthesis class W protein OS=Rattus norvegicus GN=Pigw PE=1 SV=1	ncc:104963919/0.0/pigw; phosphatidylinositol-glycan biosynthesis class W protein; K05283 phosphatidylinositol glycan, class W [EC:2.3.-.-]	biological_process:GO:0006506//GPI anchor biosynthetic process;cellular_component:GO:0005789//endoplasmic reticulum membrane;GO:0016021//integral component of membrane;molecular_function:GO:0016746//transferase activity, transferring acyl groups;
S.schlegelii_GLEAN_10013127	5.82547	4.89468	3.46406e-06	9.00012e-05	gi|808870084|gb|KKF20007.1|/0/F-box only protein 46 [Larimichthys crocea]	Q6PJ61/0.0/ FBX46_HUMAN F-box only protein 46 OS=Homo sapiens GN=FBXO46 PE=1 SV=3	lco:104927207/0.0/fbxo46; F-box protein 46; K10320 F-box protein 46	biological_process:GO:0035556//intracellular signal transduction;molecular_function:GO:0005515//protein binding;
S.schlegelii_GLEAN_10023417	5.82897	4.89742	1.90214e-06	5.26259e-05	gi|657532223|ref|XP_008304109.1|/0/PREDICTED: sodium-dependent phosphate transporter 1-A-like [Stegastes partitus]	Q6NV12/0.0/ S20AA_DANRE Sodium-dependent phosphate transporter 1-A OS=Danio rerio GN=slc20a1a PE=2 SV=1	lcf:108878689/0.0/sodium-dependent phosphate transporter 1-A-like; K14640 solute carrier family 20 (sodium-dependent phosphate transporter)	biological_process:GO:0006817//phosphate ion transport;cellular_component:GO:0016020//membrane;molecular_function:GO:0005315//inorganic phosphate transmembrane transporter activity;
S.schlegelii_GLEAN_10017271	5.83015	4.89821	2.11875e-06	5.78887e-05	gi|808861575|gb|KKF13384.1|/0/Microtubule-associated protein RP/EB family member 3 [Larimichthys crocea]	Q5XIT1/5e-159/ MARE3_RAT Microtubule-associated protein RP/EB family member 3 OS=Rattus norvegicus GN=Mapre3 PE=1 SV=1	ncc:104942797/0.0/mapre3; microtubule-associated protein RP/EB family member 3 isoform X1; K10436 microtubule-associated protein, RP/EB family	molecular_function:GO:0005515//protein binding;GO:0008017//microtubule binding;
S.schlegelii_GLEAN_10012140	5.83062	4.89826	2.92211e-06	7.65684e-05	gi|673912017|gb|AIK66528.1|/1.02556e-88/interleukin 22 [Dicentrarchus labrax]	Q9JJY8/8e-07/ IL22B_MOUSE Interleukin-22b OS=Mus musculus GN=Il22b PE=2 SV=2	lcf:108901409/6e-97/interleukin-24-like isoform X1; K05445 interleukin 22	cellular_component:GO:0005576//extracellular region;
S.schlegelii_GLEAN_10002342	5.83317	4.89928	4.81859e-06	0.000117818	gi|734615270|ref|XP_010735219.1|/0/PREDICTED: ankyrin repeat and SOCS box protein 13-like [Larimichthys crocea]	Q8WXK3/6e-119/ ASB13_HUMAN Ankyrin repeat and SOCS box protein 13 OS=Homo sapiens GN=ASB13 PE=1 SV=2	lco:104923746/0.0/ankyrin repeat and SOCS box protein 13-like; K10335 ankyrin repeat and SOCS box protein 13	biological_process:GO:0035556//intracellular signal transduction;molecular_function:GO:0005515//protein binding;
S.schlegelii_GLEAN_10013486	5.83829	4.90347	2.24164e-06	6.03865e-05	gi|808869052|gb|KKF19230.1|/8.62573e-107/UPF0485 protein [Larimichthys crocea]	Q504E7/1e-80/ SZRD1_DANRE SUZ domain-containing protein 1 OS=Danio rerio GN=szrd1 PE=1 SV=1	tgu:100232199/4e-08/adaptin ear-binding coat-associated protein 2-like; K20069 adaptin ear-binding coat-associated protein 1/2	NA
S.schlegelii_GLEAN_10015839	5.83952	4.90425	1.93663e-06	5.33876e-05	gi|551531486|ref|XP_005817193.1|/0/PREDICTED: putative RNA-binding protein 15 [Xiphophorus maculatus]	Q62504/6e-19/ MINT_MOUSE Msx2-interacting protein OS=Mus musculus GN=Spen PE=1 SV=2	xtr:100490588/8e-169/rbm15; RNA binding motif protein 15; K13190 RNA-binding protein 15	molecular_function:GO:0003676//nucleic acid binding;
S.schlegelii_GLEAN_10006883	5.84024	4.90471	1.9899e-06	5.47416e-05	gi|808860000|gb|KKF12067.1|/1.57322e-100/Transmembrane emp24 domain-containing protein 6 [Larimichthys crocea]	Q8WW62/2e-61/ TMED6_HUMAN Transmembrane emp24 domain-containing protein 6 OS=Homo sapiens GN=TMED6 PE=2 SV=2	lcf:108872676/4e-103/transmembrane emp24 domain-containing protein 6-like; K20351 p24 family protein gamma-5	biological_process:GO:0006810//transport;cellular_component:GO:0016021//integral component of membrane;
S.schlegelii_GLEAN_10018132	5.84024	4.90472	2.59311e-06	6.86504e-05	gi|657578850|ref|XP_008293316.1|/3.9062e-82/PREDICTED: gap junction beta-4 protein-like [Stegastes partitus]	P36380/3e-30/ CXB4_RAT Gap junction beta-4 protein OS=Rattus norvegicus GN=Gjb4 PE=2 SV=1	lcf:108900446/2e-82/gap junction beta-4 protein-like; K07623 gap junction beta-4 protein	biological_process:GO:0007154//cell communication;cellular_component:GO:0005922//connexon complex;
S.schlegelii_GLEAN_10009703	5.84295	4.90643	2.15023e-06	5.85405e-05	gi|734598444|ref|XP_010747511.1|/0/PREDICTED: interferon-related developmental regulator 1 [Larimichthys crocea]	Q5S1U6/0.0/ IFRD1_PIG Interferon-related developmental regulator 1 OS=Sus scrofa GN=IFRD1 PE=2 SV=1	tup:102497672/2e-129/SLC4A2; solute carrier family 4 member 2; K13855 solute carrier family 4 (anion exchanger), member 2	NA
S.schlegelii_GLEAN_10003246	5.84548	4.90815	2.32424e-06	6.23928e-05	gi|657555776|ref|XP_008282258.1|/2.40933e-84/PREDICTED: SNARE-associated protein Snapin [Stegastes partitus]	O95295/1e-68/ SNAPN_HUMAN SNARE-associated protein Snapin OS=Homo sapiens GN=SNAPIN PE=1 SV=1	ncc:104956200/2e-83/snapin; SNARE-associated protein Snapin; K20002 SNARE-associated protein Snapin	biological_process:GO:0006886//intracellular protein transport;cellular_component:GO:0031083//BLOC-1 complex;
S.schlegelii_GLEAN_10006635	5.8485	4.90991	2.84456e-06	7.46636e-05	gi|315436772|gb|ADU18547.1|/0/betaine homocysteine methyltransferase isoform 5, partial [Sparus aurata]	Q32LQ4/0.0/ BHMT1_DANRE Betaine--homocysteine S-methyltransferase 1 OS=Danio rerio GN=bhmt PE=2 SV=1	lcf:108878770/0.0/betaine--homocysteine S-methyltransferase 1-like; K00544 betaine-homocysteine S-methyltransferase [EC:2.1.1.5]	NA
S.schlegelii_GLEAN_10014338	5.85069	4.91187	3.79223e-06	9.67927e-05	gi|736190614|ref|XP_010771303.1|/4.52554e-106/PREDICTED: stathmin-2-like [Notothenia coriiceps]	P55821/2e-78/ STMN2_MOUSE Stathmin-2 OS=Mus musculus GN=Stmn2 PE=1 SV=1	dre:550548/9e-50/stmn1b; stathmin 1b; K04381 stathmin	biological_process:GO:0031110//regulation of microtubule polymerization or depolymerization;
S.schlegelii_GLEAN_10008783	5.85163	4.91212	1.99287e-06	5.47416e-05	gi|734635243|ref|XP_010746199.1|/0/PREDICTED: hyaluronan and proteoglycan link protein 2 isoform X1 [Larimichthys crocea]	Q9ESM3/2e-135/ HPLN2_MOUSE Hyaluronan and proteoglycan link protein 2 OS=Mus musculus GN=Hapln2 PE=1 SV=1	lco:104932621/0.0/hapln2; hyaluronan and proteoglycan link protein 2; K06851 hyaluronan and proteoglycan link protein 2	biological_process:GO:0007155//cell adhesion;molecular_function:GO:0005515//protein binding;GO:0005540//hyaluronic acid binding;
S.schlegelii_GLEAN_10005206	5.85427	4.91351	3.55591e-06	9.22314e-05	gi|736301054|ref|XP_010793122.1|/0/PREDICTED: abhydrolase domain-containing protein 8-like [Notothenia coriiceps]	Q6AX59/0.0/ ABHD8_XENLA Protein ABHD8 OS=Xenopus laevis GN=abhd8 PE=2 SV=1	lcf:108896437/0.0/protein ABHD8-like isoform X1; K13701 abhydrolase domain-containing protein 8	molecular_function:GO:0003824//catalytic activity;
S.schlegelii_GLEAN_10015163	5.85701	4.91564	2.13911e-06	5.83412e-05	gi|317419489|emb|CBN81526.1|/0/DnaJ homolog subfamily B member 12 [Dicentrarchus labrax]	Q9NXW2/8e-162/ DJB12_HUMAN DnaJ homolog subfamily B member 12 OS=Homo sapiens GN=DNAJB12 PE=1 SV=4	lco:104928462/0.0/dnajb12, DnaJ; DnaJ heat shock protein family (Hsp40) member B12; K09518 DnaJ homolog subfamily B member 12	NA
S.schlegelii_GLEAN_10019806	5.86371	4.91953	4.72839e-06	0.000115797	gi|355467779|gb|AER92771.1|/0/Toll-like receptor 7, partial [Hippoglossus hippoglossus]	Q9NYK1/2e-146/ TLR7_HUMAN Toll-like receptor 7 OS=Homo sapiens GN=TLR7 PE=2 SV=1	ncc:104947493/0.0/tlr7; toll-like receptor 7; K05404 toll-like receptor 7	biological_process:GO:0002755//MyD88-dependent toll-like receptor signaling pathway;GO:0006955//immune response;GO:0007165//signal transduction;GO:0034154//toll-like receptor 7 signaling pathway;GO:0051607//defense response to virus;cellular_component:GO:0016021//integral component of membrane;molecular_function:GO:0003727//single-stranded RNA binding;GO:0004888//transmembrane signaling receptor …
S.schlegelii_GLEAN_10003847	5.86392	4.92017	2.17505e-06	5.89057e-05	gi|657571206|ref|XP_008289164.1|/0/PREDICTED: putative N-acetylglucosamine-6-phosphate deacetylase [Stegastes partitus]	Q6P0U0/0.0/ NAGA_DANRE N-acetylglucosamine-6-phosphate deacetylase OS=Danio rerio GN=amdhd2 PE=2 SV=1	lco:104923353/0.0/amdhd2; amidohydrolase domain containing 2; K01443 N-acetylglucosamine-6-phosphate deacetylase [EC:3.5.1.25]	molecular_function:GO:0016787//hydrolase activity;
S.schlegelii_GLEAN_10020743	5.86635	4.92178	2.45343e-06	6.50646e-05	gi|736158556|ref|XP_010779923.1|/1.09952e-124/PREDICTED: uncharacterized protein LOC104954503 [Notothenia coriiceps]	NA	NA	biological_process:GO:0040007//growth;cellular_component:GO:0005737//cytoplasm;
S.schlegelii_GLEAN_10013105	5.86743	4.92244	1.23953e-06	3.51847e-05	gi|657593111|ref|XP_008301111.1|/2.8025e-157/PREDICTED: transcription cofactor HES-6-like [Stegastes partitus]	Q96HZ4/5e-68/ HES6_HUMAN Transcription cofactor HES-6 OS=Homo sapiens GN=HES6 PE=2 SV=1	lco:104919393/2e-143/transcription cofactor HES-6; K09087 hairy and enhancer of split 2/6/7	biological_process:GO:0006355//regulation of transcription, DNA-templated;molecular_function:GO:0003677//DNA binding;GO:0046983//protein dimerization activity;
S.schlegelii_GLEAN_10020122	5.87546	4.92787	1.55318e-06	4.3362e-05	gi|657599382|ref|XP_008304501.1|/4.17171e-173/PREDICTED: protein orai-2 [Stegastes partitus] &gt;gi|657599384|ref|XP_008304502.1| PREDICTED: protein orai-2 [Stegastes partitus]	Q6NZI6/2e-150/ ORAI2_XENLA Protein orai-2 OS=Xenopus laevis GN=orai2 PE=2 SV=1	lco:104921107/9e-169/orai2; ORAI calcium release-activated calcium modulator 2; K16057 calcium release-activated calcium channel protein 2	cellular_component:GO:0016021//integral component of membrane;
S.schlegelii_GLEAN_10022025	5.87713	4.92879	1.47055e-06	4.11389e-05	gi|734635806|ref|XP_010746511.1|/0/PREDICTED: nipped-B-like protein B, partial [Larimichthys crocea]	Q9BWW8/8e-14/ APOL6_HUMAN Apolipoprotein L6 OS=Homo sapiens GN=APOL6 PE=2 SV=1	sasa:106608984/2e-164/uncharacterized LOC106608984; K14480 apolipoprotein L	biological_process:GO:0006869//lipid transport;GO:0042157//lipoprotein metabolic process;cellular_component:GO:0005576//extracellular region;molecular_function:GO:0008289//lipid binding;
S.schlegelii_GLEAN_10016250	5.87872	4.92983	1.18877e-06	3.38657e-05	gi|928081481|ref|XP_013855565.1|/4.36361e-60/PREDICTED: UPF0235 protein C15orf40 homolog [Austrofundulus limnaeus]	Q9CRC3/4e-38/ CO040_MOUSE UPF0235 protein C15orf40 homolog OS=Mus musculus PE=1 SV=1	nfu:107396205/2e-59/UPF0235 protein C15orf40 homolog; K09131 uncharacterized protein	NA
S.schlegelii_GLEAN_10018840	5.88237	4.93199	2.3652e-06	6.3161e-05	gi|808866687|gb|KKF17359.1|/2.92034e-164/Transmembrane protein 53 [Larimichthys crocea]	Q6DHN0/4e-10/ TMM53_DANRE Transmembrane protein 53 OS=Danio rerio GN=tmem53 PE=2 SV=1	NA	NA
S.schlegelii_GLEAN_10015961	5.88314	4.93271	1.09905e-06	3.14848e-05	gi|908527412|ref|XP_013127999.1|/6.80047e-158/PREDICTED: cell surface glycoprotein 1-like, partial [Oreochromis niloticus]	Q96JE9/3e-21/ MAP6_HUMAN Microtubule-associated protein 6 OS=Homo sapiens GN=MAP6 PE=1 SV=2	pret:103473094/7e-82/1-phosphatidylinositol phosphodiesterase-like; K01771 1-phosphatidylinositol phosphodiesterase [EC:4.6.1.13]	NA
S.schlegelii_GLEAN_10014934	5.88332	4.93286	1.38498e-06	3.90927e-05	gi|908534369|ref|XP_013124395.1|/0/PREDICTED: zinc finger CCCH domain-containing protein 13 isoform X1 [Oreochromis niloticus] &gt;gi|908534371|ref|XP_013124396.1| PREDICTED: zinc finger CCCH domain-containing protein 13 isoform X1 [Oreochromis niloticus]	Q5T200/3e-98/ ZC3HD_HUMAN Zinc finger CCCH domain-containing protein 13 OS=Homo sapiens GN=ZC3H13 PE=1 SV=1	NA	molecular_function:GO:0046872//metal ion binding;
S.schlegelii_GLEAN_10022227	5.88412	4.93326	1.47087e-06	4.11389e-05	gi|974056737|ref|XP_015225343.1|/0/PREDICTED: aquaporin-1 [Cyprinodon variegatus]	P50501/5e-112/ AQPA_PELES Aquaporin FA-CHIP OS=Pelophylax esculentus GN=AQPA PE=2 SV=1	lco:104917699/0.0/aquaporin FA-CHIP; K09864 aquaporin-1	biological_process:GO:0006810//transport;cellular_component:GO:0016020//membrane;molecular_function:GO:0005215//transporter activity;
S.schlegelii_GLEAN_10008233	5.88497	4.93381	1.43763e-06	4.03562e-05	gi|808869393|gb|KKF19435.1|/2.38001e-43/HLA class II histocompatibility antigen gamma chain [Larimichthys crocea]	Q5XHC5/1e-08/ IBP2_XENLA Insulin-like growth factor-binding protein 2 OS=Xenopus laevis GN=igfbp2 PE=2 SV=1	mdo:100029179/1e-07/CD74; CD74 molecule; K06505 CD74 antigen	biological_process:GO:0006886//intracellular protein transport;GO:0006955//immune response;GO:0019882//antigen processing and presentation;cellular_component:GO:0016020//membrane;molecular_function:GO:0042289//MHC class II protein binding;
S.schlegelii_GLEAN_10002293	5.88855	4.93618	1.35149e-06	3.82174e-05	gi|657580165|ref|XP_008294035.1|/0/PREDICTED: vitamin K-dependent protein C-like [Stegastes partitus]	Q9GLP2/3e-138/ PROC_PIG Vitamin K-dependent protein C OS=Sus scrofa GN=PROC PE=2 SV=1	lcf:108882451/0.0/proc; vitamin K-dependent protein C; K01344 protein C (activated) [EC:3.4.21.69]	biological_process:GO:0006508//proteolysis;cellular_component:GO:0005576//extracellular region;molecular_function:GO:0004252//serine-type endopeptidase activity;GO:0005509//calcium ion binding;GO:0005515//protein binding;
S.schlegelii_GLEAN_10002317	5.89719	4.94198	2.77849e-06	7.33053e-05	gi|974114119|ref|XP_015256409.1|/0/PREDICTED: UDP-glucuronosyltransferase 2C1-like [Cyprinodon variegatus]	P20720/4e-140/ UD12_RAT UDP-glucuronosyltransferase 1-2 OS=Rattus norvegicus GN=Ugt1a2 PE=2 SV=2	ola:101165182/0.0/UDP-glucuronosyltransferase 2B15-like; K00699 glucuronosyltransferase [EC:2.4.1.17]	biological_process:GO:0008152//metabolic process;molecular_function:GO:0016758//transferase activity, transferring hexosyl groups;
S.schlegelii_GLEAN_10022232	5.89998	4.94379	1.14473e-06	3.26717e-05	gi|736165565|ref|XP_010764391.1|/0/PREDICTED: coiled-coil domain-containing protein 13 isoform X1 [Notothenia coriiceps] &gt;gi|736165570|ref|XP_010764392.1| PREDICTED: coiled-coil domain-containing protein 13 isoform X1 [Notothenia coriiceps] &gt;gi|736165575|ref|XP_010764393.1| PREDICTED: coiled-coil domain-containing protein 13 isoform X1 [Notothenia coriiceps]	D3YV10/1e-112/ CCD13_MOUSE Coiled-coil domain-containing protein 13 OS=Mus musculus GN=Ccdc13 PE=1 SV=1	NA	NA
S.schlegelii_GLEAN_10014522	5.90221	4.94531	1.91748e-06	5.2955e-05	gi|736306409|ref|XP_010794751.1|/0/PREDICTED: mitochondrial folate transporter/carrier [Notothenia coriiceps]	Q9H2D1/8e-161/ MFTC_HUMAN Mitochondrial folate transporter/carrier OS=Homo sapiens GN=SLC25A32 PE=1 SV=2	ncc:104967062/0.0/slc25a32; mitochondrial folate transporter/carrier; K15115 solute carrier family 25 (mitochondrial folate transporter), member 32	biological_process:GO:0006839//mitochondrial transport;cellular_component:GO:0031966//mitochondrial membrane;
S.schlegelii_GLEAN_10022706	5.90247	4.94528	1.8039e-06	5.01791e-05	gi|736210525|ref|XP_010777069.1|/0/PREDICTED: serine/threonine-protein kinase Nek4-like [Notothenia coriiceps]	Q9Z1J2/6e-77/ NEK4_MOUSE Serine/threonine-protein kinase Nek4 OS=Mus musculus GN=Nek4 PE=1 SV=1	lcf:108882819/0.0/serine/threonine-protein kinase Nek4-like; K08857 NIMA (never in mitosis gene a)-related kinase 1/4/5 [EC:2.7.11.1]	biological_process:GO:0006468//protein phosphorylation;molecular_function:GO:0004672//protein kinase activity;GO:0005524//ATP binding;
S.schlegelii_GLEAN_10012673	5.9183	4.95509	3.08034e-06	8.05769e-05	gi|348521704|ref|XP_003448366.1|/0/PREDICTED: guanine nucleotide-binding protein G(I)/G(S)/G(T) subunit beta-1 [Oreochromis niloticus] &gt;gi|542229658|ref|XP_005453557.1| PREDICTED: guanine nucleotide-binding protein G(I)/G(S)/G(T) subunit beta-1 [Oreochromis niloticus] &gt;gi|542229660|ref|XP_005453558.1| PREDICTED: guanine nucleotide-binding protein G(I)/G(S)/G(T) subunit beta-1 [Oreochromis n…	Q6PH57/0.0/ GBB1_DANRE Guanine nucleotide-binding protein G(I)/G(S)/G(T) subunit beta-1 OS=Danio rerio GN=gnb1 PE=2 SV=1	bpec:110168733/0.0/guanine nucleotide-binding protein G(I)/G(S)/G(T) subunit beta-1; K04536 guanine nucleotide-binding protein G(I)/G(S)/G(T) subunit beta-1	biological_process:GO:0007165//signal transduction;molecular_function:GO:0005515//protein binding;
S.schlegelii_GLEAN_10019295	5.92037	4.95692	1.71219e-06	4.77146e-05	gi|928050413|ref|XP_013874329.1|/0/PREDICTED: L-threonine 3-dehydrogenase, mitochondrial-like [Austrofundulus limnaeus]	Q2KIR8/0.0/ TDH_BOVIN L-threonine 3-dehydrogenase, mitochondrial OS=Bos taurus GN=TDH PE=2 SV=1	lcf:108895580/0.0/LOW QUALITY PROTEIN: L-threonine 3-dehydrogenase, mitochondrial-like; K15789 threonine 3-dehydrogenase [EC:1.1.1.103]	molecular_function:GO:0003824//catalytic activity;GO:0050662//coenzyme binding;
S.schlegelii_GLEAN_10021882	5.92409	4.95977	1.23966e-06	3.51847e-05	gi|734606787|ref|XP_010730553.1|/1.70853e-84/PREDICTED: coiled-coil domain-containing protein 74A-like [Larimichthys crocea]	Q96AQ1/3e-11/ CC74A_HUMAN Coiled-coil domain-containing protein 74A OS=Homo sapiens GN=CCDC74A PE=2 SV=1	NA	NA
S.schlegelii_GLEAN_10012799	5.93093	4.96429	1.43283e-06	4.02951e-05	gi|657552527|ref|XP_008280637.1|/0/PREDICTED: cytochrome c oxidase assembly protein COX15 homolog [Stegastes partitus]	Q8BJ03/0.0/ COX15_MOUSE Cytochrome c oxidase assembly protein COX15 homolog OS=Mus musculus GN=Cox15 PE=1 SV=1	ncc:104955150/0.0/cytochrome c oxidase assembly protein COX15 homolog; K02259 cytochrome c oxidase assembly protein subunit 15	biological_process:GO:0006784//heme a biosynthetic process;GO:0055114//oxidation-reduction process;cellular_component:GO:0016021//integral component of membrane;molecular_function:GO:0016627//oxidoreductase activity, acting on the CH-CH group of donors;
S.schlegelii_GLEAN_10005248	5.94376	4.97279	6.05368e-07	1.79448e-05	gi|583997749|ref|XP_006793965.1|/6.27205e-99/PREDICTED: biogenesis of lysosome-related organelles complex 1 subunit 6-like [Neolamprologus brichardi]	Q08DU8/3e-61/ BL1S6_BOVIN Biogenesis of lysosome-related organelles complex 1 subunit 6 OS=Bos taurus GN=BLOC1S6 PE=1 SV=1	lcf:108887890/5e-102/bloc1s6; biogenesis of lysosome-related organelles complex 1 subunit 6; K20188 biogenesis of lysosome-related organelles complex 1 subunit 6	NA
S.schlegelii_GLEAN_10018848	5.95444	4.97978	9.3881e-07	2.70458e-05	gi|734603811|ref|XP_010728933.1|/0/PREDICTED: lumican [Larimichthys crocea] &gt;gi|734603813|ref|XP_010728934.1| PREDICTED: lumican [Larimichthys crocea]	P51890/6e-124/ LUM_CHICK Lumican OS=Gallus gallus GN=LUM PE=1 SV=1	lco:104918779/0.0/lum; lumican; K08122 lumican	biological_process:GO:0007601//visual perception;GO:0030199//collagen fibril organization;cellular_component:GO:0005578//proteinaceous extracellular matrix;molecular_function:GO:0005515//protein binding;
S.schlegelii_GLEAN_10006837	5.95535	4.98047	5.52316e-07	1.65965e-05	gi|808879406|gb|KKF27452.1|/0/WD repeat-containing protein 3 [Larimichthys crocea]	Q9UNX4/0.0/ WDR3_HUMAN WD repeat-containing protein 3 OS=Homo sapiens GN=WDR3 PE=1 SV=1	lcf:108872822/0.0/wdr3; LOW QUALITY PROTEIN: WD repeat-containing protein 3; K14556 U3 small nucleolar RNA-associated protein 12	molecular_function:GO:0005515//protein binding;
S.schlegelii_GLEAN_10019542	5.95634	4.98113	5.51117e-07	1.65965e-05	gi|736184893|ref|XP_010769751.1|/8.87672e-80/PREDICTED: protein FAM180A-like [Notothenia coriiceps]	Q6P0A1/9e-12/ F180B_HUMAN Protein FAM180B OS=Homo sapiens GN=FAM180B PE=2 SV=2	NA	NA
S.schlegelii_GLEAN_10009055	5.96318	4.98564	6.84473e-07	2.01262e-05	gi|657556563|ref|XP_008282575.1|/0/PREDICTED: cyclin-G1 [Stegastes partitus]	Q5E9I1/2e-131/ CCNG1_BOVIN Cyclin-G1 OS=Bos taurus GN=CCNG1 PE=2 SV=1	lcf:108882935/0.0/ccng1; cyclin-G1; K10145 cyclin G1	biological_process:GO:0051726//regulation of cell cycle;
S.schlegelii_GLEAN_10007421	5.96363	4.98611	8.10434e-07	2.36133e-05	gi|734632039|ref|XP_010744432.1|/0/PREDICTED: dehydrogenase/reductase SDR family member 1 [Larimichthys crocea]	Q99L04/5e-133/ DHRS1_MOUSE Dehydrogenase/reductase SDR family member 1 OS=Mus musculus GN=Dhrs1 PE=1 SV=1	lcf:108883937/0.0/dhrs1; dehydrogenase/reductase SDR family member 1; K11163 dehydrogenase/reductase SDR family member 1 [EC:1.1.-.-]	biological_process:GO:0008152//metabolic process;molecular_function:GO:0016491//oxidoreductase activity;
S.schlegelii_GLEAN_10006629	5.9676	4.98872	7.38914e-07	2.16115e-05	gi|808857639|gb|KKF10181.1|/0/Metaxin-3 [Larimichthys crocea]	Q4VBW0/9e-161/ MTX3_DANRE Metaxin-3 OS=Danio rerio GN=mtx3 PE=2 SV=2	lcf:108878152/0.0/mtx3; metaxin-3 isoform X1; K17776 metaxin	NA
S.schlegelii_GLEAN_10004801	5.96937	4.98984	5.86228e-07	1.74787e-05	gi|657565668|ref|XP_008286144.1|/6.76398e-168/PREDICTED: NADPH oxidase organizer 1 [Stegastes partitus]	Q8NFA2/1e-56/ NOXO1_HUMAN NADPH oxidase organizer 1 OS=Homo sapiens GN=NOXO1 PE=1 SV=1	ncc:104957771/3e-161/noxo1; NADPH oxidase organizer 1; K17934 NADPH oxidase organizer 1	molecular_function:GO:0005515//protein binding;GO:0035091//phosphatidylinositol binding;
S.schlegelii_GLEAN_10014912	5.97247	4.99174	9.31562e-07	2.68875e-05	gi|77024847|gb|ABA61355.1|/2.35304e-114/gamma M5 crystallin [Dissostichus mawsoni]	P28022/1e-75/ CRGM3_CYPCA Gamma-crystallin M3 OS=Cyprinus carpio PE=3 SV=2	bacu:103015945/4e-51/TBCCD1; TBCC domain containing 1; K16810 TBCC domain-containing protein 1	NA
S.schlegelii_GLEAN_10015121	5.97277	4.99166	1.00507e-06	2.89004e-05	gi|736175790|ref|XP_010767199.1|/0/PREDICTED: phenylethanolamine N-methyltransferase [Notothenia coriiceps]	Q06AU9/1e-94/ PNMT_PIG Phenylethanolamine N-methyltransferase OS=Sus scrofa GN=PNMT PE=2 SV=1	ncc:104943468/0.0/pnmt; phenylethanolamine N-methyltransferase; K00553 phenylethanolamine N-methyltransferase [EC:2.1.1.28]	molecular_function:GO:0008168//methyltransferase activity;
S.schlegelii_GLEAN_10012670	5.97421	4.99309	5.99218e-07	1.77969e-05	gi|736229594|ref|XP_010782142.1|/0/PREDICTED: GDH/6PGL endoplasmic bifunctional protein [Notothenia coriiceps]	Q8CFX1/0.0/ G6PE_MOUSE GDH/6PGL endoplasmic bifunctional protein OS=Mus musculus GN=H6pd PE=1 SV=2	lcf:108889991/0.0/h6pd; LOW QUALITY PROTEIN: GDH/6PGL endoplasmic bifunctional protein; K13937 hexose-6-phosphate dehydrogenase [EC:1.1.1.47 3.1.1.31]	biological_process:GO:0005975//carbohydrate metabolic process;GO:0006006//glucose metabolic process;GO:0055114//oxidation-reduction process;molecular_function:GO:0004345//glucose-6-phosphate dehydrogenase activity;GO:0050661//NADP binding;
S.schlegelii_GLEAN_10009328	5.98043	4.99726	8.6327e-07	2.50104e-05	gi|657575107|ref|XP_008291287.1|/0/PREDICTED: leucine-rich repeat neuronal protein 1-like [Stegastes partitus]	A0N0X6/0.0/ LRRN1_BOVIN Leucine-rich repeat neuronal protein 1 OS=Bos taurus GN=LRRN1 PE=3 SV=1	obi:106871330/3e-34/adhesion G protein-coupled receptor A3-like; K08455 G protein-coupled receptor 112	molecular_function:GO:0005515//protein binding;
S.schlegelii_GLEAN_10002408	5.98046	4.997	8.41266e-07	2.4419e-05	gi|736307704|ref|XP_010795100.1|/2.17692e-169/PREDICTED: tubulin polyglutamylase complex subunit 1 [Notothenia coriiceps]	Q99MS8/7e-50/ TPGS1_MOUSE Tubulin polyglutamylase complex subunit 1 OS=Mus musculus GN=Tpgs1 PE=1 SV=1	lcf:108874919/7e-172/tpgs1; LOW QUALITY PROTEIN: tubulin polyglutamylase complex subunit 1; K16581 tubulin polyglutamylase complex subunit 1	NA
[truncated: 424 more rows]

## Sheet: GO enrichment analysis
GO_ID	GO_Term	GO_Class	Pvalue	Qvalue	GeneNumber	GeneID
[truncated: 9 more rows]

## Sheet: KEGG enrichment analysis
MapID	MapTitle	Pvalue	Qvalue	GeneNumber	GeneID
[truncated: 6 more rows]
